# Supplementary material for: A Genetic Screen to Identify Gain- and Loss-of-Function Modifications that Enhance T-cell Infiltration into Tumors
Source: Oxford University Press journal article supplement (doi:10.1158/2326-6066.cir-20-0056), 2020-07-01
Supplement: 23266066cir200056-sup-235968_2_supp_6307786_q2m22h.xlsx [file 23266066cir200056-sup-235968_2_supp_6307786_q2m22h.xlsx]

## Sheet: combinedScreenData
mouse_id	sex	age_at_injection	strain	tumor_model	left_tumor_area	right_tumor_area	left_tumor_%CD4	left_tumor_%CD8	right_tumor_%CD4	right_tumor_%CD8
1-1	M	7	6070/12740	B16			0.308	0.226	0.226	0.0719
1-2	M	7	6070/12740	B16			9	11.4	0.192	0.363
2-2	F	7	6070/12740	B16			2.46	1.35	0.404	0.186
3-4	F	6	6070/12740	B16			2.64	1.2	0.581	0.234
4-2	M	6	6070/12740	B16			0.148	0.0967	0.218	0.12
5-2	F	6	6070/12740	B16			0.485	0.249	0.236	0.0999
12-3	M	7.1	6113/12775	B16	0	0	0.788	0.68	0.474	0.369
101NT-3	F	9.1	6070/12740	B16	483.103	432.326
13-1	F	6.3	6070/12740	B16	0	142.444	5.46	9.44	2.78	3.3
13-3	F	6.3	6070/12740	B16	0	122.322	13.7	5.42	1.4	0.505
14-1	F	6.3	6070/12740	B16	0	144.514	0.942	0.5	1.19	0.621
16-1	M	6.3	6113/12775	B16	397.952	296.815	0.553	0.417	0.214	0.178
16-2	M	6.3	6113/12775	B16	154.577	350.657	2.59	2.52	0.246	0.158
16-3	M	6.3	6113/12775	B16	220.756	222.673	3.8	2.44	1.01	0.611
16-4	M	6.3	6113/12775	B16	204.633	211.313	1.98	0.892	2.04	1.28
17-1	F	6.3	6113/12775	B16	270.214	392.685	0.302	0.244	0.371	0.273
17-3	F	6.3	6113/12775	B16	371.917	344.772	0.411	0.389	0.174	0.481
449-3	M	7.1	6070/12740	B16	324.619	456.018	0.381	0.254	0.223	0.157
449-4	M	7.1	6070/12740	B16	292.803	421.314	0.376	0.917	0.186	0.5
450-1	F	7.1	6070/12740	B16	0	679.733	0.232	0.213	0.164	0.46
450-3	F	7.1	6070/12740	B16	158.596	293.83	5.27	8.11	1.85	2.3
451-3	M	7.1	6070/12740	B16	291.356	254.872	0.388	0.686	0.993	0.221
451-4	M	7.1	6070/12740	B16	555.152	319.331	0.00457	0.12	0.0866	0.219
451-5	M	7.1	6070/12740	B16	251.517	276.08	1.19	2.93	1.35	2.86
452-1	F	7.4	6070/12740	B16	281.671	313.285	0.193	0.3	0.0356	0.0261
453-2	M	6.3	6113/12775	B16	456.475	481.137	0.055	0.0131	0.0195	0.0112
454-3	F	6.3	6113/12775	B16	580.974	454.296	0.0131	0.0181	0.333	0.209
455-1	M	6.7	6113/12775	B16	440.579	288.558	0.0329	0.0375	0.148	0.102
455-2	M	6.7	6113/12775	B16	341.854	329.043	0.131	0.203	0.078	0.319
456-4	F	6.7	6113/12775	B16	283.294	556.228	0.0481	0.371	0.04	0.0325
460-1	M	7.7	6070/12740	B16	342.557	323.768	0.28	0.185	0.659	0.261
461-1	F	7.7	6070/12740	B16	191.948	212.536	0.0803	0.0545	0.0854	0.0677
462-3	M	7.6	6070/12740	B16	295.168	256.252	0.0752	0.0248	0.116	0.106
462-4	M	7.6	6070/12740	B16	284.444	131.322	0.104	0.132	0.167	0.528
463-1	F	7.6	6070/12740	B16	273.067	454.775	0.296	0.265	0.125	0.0767
464-1	M	7.6	6113/12775	B16	235.683	505.75	0.179	0.0708	0.104	0.0451
464-2	M	7.6	6113/12775	B16	434.834	376.234	0.12	0.0618	0.154	0.0641
468-4	M	6.1	6113/12775	B16	280.635	239.869	0.0589	0.0414	0.0342	0.0291
469-1	F	6.1	6113/12775	B16	253.24	350.054	0.068	0.0356	0.021	0.0157
474-1	M	6.6	6070/12740	B16	449.511	428.935	0.709	0.6	0.321	0.378
474-2	M	6.6	6070/12740	B16	319.637	416.064	0.162	0.11	0.288	0.125
474-3	M	6.6	6070/12740	B16	466.325	379.008	0.43	0.331	0.355	0.331
474-4	M	6.6	6070/12740	B16	436.924	476.651	0.301	0.289	0.354	0.41
474-5	M	6.6	6070/12740	B16	196.513	399.143	0.597	0.998	0.249	0.102
475-1	F	6.6	6070/12740	B16	404.451	432.207	0.112	0.106	0.21	0.18
475-2	F	6.6	6070/12740	B16	424.256	444.603	0.203	0.101	0.33	0.224
484-1	M	7.1	6070/12740	B16	368.46	445.501	0.228	0.868	0.562	1.52
484-2	M	7.1	6070/12740	B16	334.272	470.329	1.63	1.35	0.625	0.711
484-4	M	7.1	6070/12740	B16	282.249	484.534	0.786	0.98	0.225	0.145
485-1	F	7.1	6070/12740	B16	121.958	184.862	11.4	5.57	2.01	3.66
485-2	F	7.1	6070/12740	B16	127.782	346.048	2.17	4.09	0.573	1.35
485-3	F	7.1	6070/12740	B16	585.814	258.662	0.459	0.0675	0.564	0.469
485-4	F	7.1	6070/12740	B16	290.832	405.511	2.18	0.389	0.84	0.293
486-3	M	7	6113/12775	B16	357.129	430.13	0.257	0.221	0.976	0.172
487-2	M	7.1	6113/12775	B16	264.418	121.564	0.379	0.113	0.487	0.204
487-4	M	7.1	6113/12775	B16	0	241.155	3.68	1.19	0.624	0.213
488-3	F	7.1	6113/12775	B16	202.055	360.845	0.325	0.136	0.513	0.128
489-1	M	6.9	6070/12740	B16	99.4345	606.893	1.49	0.769	0.195	0.0792
491-2	M	6.4	6070/12740	B16	318.34	365.517	0.787	0.204	0.859	0.0697
491-3	M	6.4	6070/12740	B16	390.213	327.597	0.851	0.565	0.968	0.463
497-1	F	7.3	6070/12740	B16	259.042	578.595	0.505	0.264	0.401	0.259
497-2	F	7.3	6070/12740	B16	238.376	397.402	0.225	0.103	0.24	0.17
498-1	M	7.3	6070/12740	B16	400.649	605.11	0.253	0.143	0.206	0.123
498-2	M	7.3	6070/12740	B16	140.864	341.269	4.65	9.47	1.92	3.51
499-1	M	7.4	6113/12775	B16	304.095	205.499	0.505	0.0855	1.49	0.359
499-2	M	7.4	6113/12775	B16	351.869	278.085	0.515	0.174	1.04	0.374
502-1	M	7.3	6070/12740	B16	301.791	241.053	2.79	0.895	4.69	3.17
502-3	M	7.3	6070/12740	B16	298.178	327.907	1.95	1.93	0.594	0.27
515-1	F	9.1	6113/12775	B16	471.916	372.562	1.12	1.74	0.271	1.37
515-2	F	9.1	6113/12775	B16	366.522	393.011	1.09	2.23	0.501	0.893
516-2	F	9.1	6113/12775	B16	577.09	489.24	0.69	1.07	0.357	0.306
517-1	M	9.1	6113/12775	B16	445.257	420.424	0.911	1.03	1.41	2.13
518-1	M	9	6113/12775	B16	469.766	582.211	1.46	0.922	0.619	1.25
518-2	M	9	6113/12775	B16	396.521	505.19	1.65	0.348	0.505	0.332
519-1	F	9.1	6113/12775	B16	378.176	455.663	0.134	0.171	0.188	0.0988
519-3	F	9.1	6113/12775	B16	377.524	350.71	0.0384	0.0329	0.343	0.223
520-1	M	9	6113/12775	B16	402.91	145.441	0.212	0.0769	2.39	2.54
520-2	M	9	6113/12775	B16	124.942	368.965	3.72	2.05	0.939	0.592
521-1	F	9	6113/12775	B16	537.871	397.096	0.406	0.314	0.175	0.175
521-2	F	9	6113/12775	B16	425.225	307.993	1.02	0.616	1.91	1.52
522-1	M	8.7	6070/12740	B16	488.48	232.605	0.337	0.547	2.45	3.01
522-2	M	8.7	6070/12740	B16	481.493	458.919	0.448	0.194	0.388	0.241
524-1	F	8.6	6070/12740	B16	312.356	183.712	0.744	0.347	2.22	1.76
524-2	F	8.6	6070/12740	B16	456.251	357.88	1.01	0.499	0.503	0.492
525-1	M	8.6	6070/12740	B16	406.135	466.762	0.687	0.302	0.389	0.432
525-2	M	8.6	6070/12740	B16	124.45	438.871	2.46	1.46	1.1	0.12
160-2	M	9.1	6113/12775	B16PD1	246.357	507.996	2.54	0.494	0.313	0.0353
160-3	M	9.1	6113/12775	B16PD1	283.43	580.813	3.76	1.31	0.631	0.235
161-4	F	9.1	6113/12775	B16PD1	98.2319	242.125	3.34	0.488	2.15	0.428
163-1	F	7.3	6070/12740	B16PD1	355.517	262.202
163-2	F	7.3	6070/12740	B16PD1	228.893	189.926	1.18	0.405	1.1	0.435
163-3	F	7.3	6070/12740	B16PD1	124.341	128.016
531-1	F	7.4	6113/12775	B16PD1	231.622	254.026	0.277	0.321	2.23	0.858
531-2	F	7.4	6113/12775	B16PD1	311.052	330.66	2.74	3.22	1.55	1.84
532-1	M	7.4	6113/12775	B16PD1	350.227	549.585	1.92	1.24	1.17	0.779
532-2	M	7.4	6113/12775	B16PD1	450.017	331.958	1.43	0.549	1.42	1.3
533-1	F	7.7	6070/12740	B16PD1	334.243	308.173	2.31	1.75	2.51	0.778
533-2	F	7.7	6070/12740	B16PD1	334.243	308.173	2.47	0.181	1.3	0.448
533-3	F	7.7	6070/12740	B16PD1	315.717	449.334	1.7	0.482	2.34	0.508
534-1	M	7.7	6070/12740	B16PD1			4.53	2.7	2.51	2.4
534-2	M	7.7	6070/12740	B16PD1			2.6	0.9	0.487	0.7
534-3	M	7.7	6070/12740	B16PD1			2.47	0.6	0.355	0.3
537-1	F	5.7	6070/12740	B16PD1	279.988	151.951	3.38	0.6	6.67	6.2
537-2	F	5.7	6070/12740	B16PD1	350.551	205.906	1.2	0.503	0.8	0.315
537-4	F	5.7	6070/12740	B16PD1	307.517	265.747	0.2	0.369	0.6	0.273
18-2	M	10.7	6070/12740	EL4	394.257	406.009	7.59	1.15	9.83	1.21
19-2	F	10.7	6070/12740	EL4	290.769	323.568	12.4	1.93	8.93	0.445
22-3	F	9.7	6070/12740	EL4	283.916	263.201	25.3	2.54	16.2	3.2
24-1	F	9.7	6070/12740	EL4	306.836	341.707	10.8	0.699	6.16	1
25-3	M	8.4	6113/12775	EL4	410.735	375.483	10.5	0.282	12.7	0.0595
26-4	F	8.4	6113/12775	EL4	368.852	396.302	13	0.255	9.74	0.366
27-3	M	10.1	6070/12740	EL4	450.722	331.114	12.9	4.55	15.7	1.11
28-1	F	10.1	6070/12740	EL4	409.605	307.02	18.1	1.48	17.6	0.419
28-2	F	10.1	6070/12740	EL4	290.455	333.104	29.3	1.6	24.9	1.27
28-3	F	10.1	6070/12740	EL4	278.322	340.91	11.8	0.504	15.6	0.432
28-4	F	10.1	6070/12740	EL4	300.637	332.102	19.1	2.32	14.1	2.21
29-2	M	9.7	6070/12740	EL4	383.028	338.102	12.2	2.92	12.4	1.69
32-1	F	8.9	6113/12775	EL4	375.782	334.965	22.5	1.18	24.6	0.551
32-2	F	8.9	6113/12775	EL4	363.237	340.466	26	0.126	21.2	0.193
32-3	F	8.9	6113/12775	EL4	390.057	400.841	26.5	0.23	20.7	0.27
33-2	F	9.3	6070/12740	EL4	248.829	322.843	6.41	1.05	17.6	0.45
34-5	M	9.3	6070/12740	EL4	530.663	467.284	7.62	0.635	5.88	0.176
36-2	F	8	6113/12775	EL4	395.827	387.234	9.96	0.269	18.2	0.722
36-3	F	8	6113/12775	EL4	442.586	326.513	9.09	0.28	4.82	0.059
36-4	F	8	6113/12775	EL4	415.652	325.4	23.9	0.82	20	0.805
37-2	M	7	6113/12775	EL4	424.494	411.896	12	0.986	17.8	0.641
38-3	F	7	6113/12775	EL4	376.464	402.722	12	2.43	24.2	0.503
39-4	M	11.1	6070/12740	EL4	362.89	285.305
41-1	M	9.1	6113/12775	EL4	469.667	478.582
43-2	F	9.1	6113/12775	EL4	359.793	395.259
44-2	M	8	6070/12740	EL4	575.97	403.281
45-1	F	8	6070/12740	EL4	365.177	353.126
46-2	M	8	6070/12740	EL4	215.423	279.822
47-1	F	8	6070/12740	EL4	626.101	453.186
47-2	F	8	6070/12740	EL4	268.866	379.369
48-1	M	6.3	6070/12740	EL4	316.366	331.516
48-4	M	6.3	6070/12740	EL4	214.76	336.98
49-1	F	6.3	6070/12740	EL4	333.428	217.913
52-2	M	5.3	6113/12775	EL4	173.755	185.741
52-5	M	5.3	6113/12775	EL4	388.399	255.124
54-2	M	5.3	6113/12775	EL4	128.729	218.026
54-3	M	5.3	6113/12775	EL4	377.978	251.715
54-4	M	5.3	6113/12775	EL4	207.347	0
55-2	F	5.3	6113/12775	EL4	139.01	185.768
59-1	F	12	6113/12775	EL4	263.699	483.615	12.2	1.74	28	0.218
60-1	M	11.4	6113/12775	EL4	284.328	382.717	9.14	1.67	10.7	1.38
60-2	M	11.4	6113/12775	EL4	209.052	270.038	24.4	0.483	9.4	0.435
61-2	F	11.4	6113/12775	EL4	404.124	342.258	13.6	2.79	11.5	0.759
62-1	M	11.4	6070/12740	EL4	268.337	201.009	11.4	1.17	4.93	1.14
63-1	M	9.6	6113/12775	EL4	341.475	271.653	21.2	0.413	14	0.719
64-1	F	9.6	6113/12775	EL4	346.033	316.71	10.2	0.913	14.4	0.21
64-2	F	9.6	6113/12775	EL4	343.091	370.755	15.8	1.64	10.5	0.321
64-5	F	9.6	6113/12775	EL4	332.034	430.424	11.4	1.37	20.9	0.179
65-1	M	9	6070/12740	EL4	329.803	332.233	14.2	6.18	12.6	6.14
67-1	M	8.6	6070/12740	EL4	372.878	495.784	12.6	1.3	5.35	0.948
67-2	M	8.6	6070/12740	EL4	286.793	363.414	12.9	0.8	13.7	1.38
67-3	M	8.6	6070/12740	EL4	347.166	372.585	14.3	0.619	8.13	2.37
67-4	M	8.6	6070/12740	EL4	254.758	222.229	12.5	4.86	6.1	3.01
68-1	F	8.6	6070/12740	EL4	313.998	424.694	9.18	1.14	7.21	0.829
70-1	M	7.6	6113/12775	EL4	327.467	299.344	10.9	0.302	10	0.715
70-2	M	7.6	6113/12775	EL4	421.036	433.801	9.94	1.33	9.27	1.61
70-3	M	7.6	6113/12775	EL4	173.127	217.812	9.55	1.61	8.34	0.486
72-3	M	7	6070/12740	EL4	405.746	0	19.8	1.61	13.4	5.37
104-1	M	7.3	6113/12775	EL4PD1	362.749	393.239
104-3	M	7.3	6113/12775	EL4PD1	287.397	341.335
105-2	F	7.3	6113/12775	EL4PD1	296.425	293.94
113-1	M	6.7	6070/12740	EL4PD1	278.989	319.222
113-2	M	6.7	6070/12740	EL4PD1	340.13	316.512
114-1	F	6.7	6070/12740	EL4PD1	305.588	318.888
114-3	F	6.7	6070/12740	EL4PD1	318.017	255.82
115-2	M	6.1	6070/12740	EL4PD1	152.429	274.445
115-3	M	6.1	6070/12740	EL4PD1	179.084	278.186
116-1	F	6.1	6070/12740	EL4PD1	279.41	282.785
116-2	F	6.1	6070/12740	EL4PD1	247.43	232.018
116-3	F	6.1	6070/12740	EL4PD1	325.763	309.06
117-1	M	6	6070/12740	EL4PD1	297.122	382.799
117-3	M	6	6070/12740	EL4PD1	294.184	324.331
118-1	F	6	6070/12740	EL4PD1	279.965	383.367
118-2	F	6	6070/12740	EL4PD1	268.197	225.15
118-3	F	6	6070/12740	EL4PD1	311.463	283.776
119-1	M	6.1	6070/12740	EL4PD1	332.121	268.564
119-4	M	6.1	6070/12740	EL4PD1	266.713	370.411
149-2	M	13	6113/12775	EL4PD1	357.054	475.817	4.45	2.83	10.8	2.16
149-4	M	13	6113/12775	EL4PD1	364.623	302.009	6.33	2.93	6.4	3.16
150-2	M	11.3	6070/12740	EL4PD1	98.374	205.624			5.29	21.4
150-3	M	11.3	6070/12740	EL4PD1	350.403	457.381	3.49	3.91	4.51	1.81
152-1	M	11.1	6070/12740	EL4PD1	456.3	337.544	4.02	6.99	9.96	6.65
152-2	M	11.1	6070/12740	EL4PD1	312.525	381.828	5.28	5.45	7.73	5
152-3	M	11.1	6070/12740	EL4PD1	392.45	336.042	5.04	2.19	8.59	2.06
153-3	F	11.1	6070/12740	EL4PD1	421.783	299.791	4.62	6.34	2.88	3.34
154-1	M	10.3	6070/12740	EL4PD1	460.226	380.298	3.41	3.84	3.09	3.48
156-2	M	7.7	6113/12775	EL4PD1	399.338	498.226	10.3	1.32	4.47	3.56
156-3	M	7.7	6113/12775	EL4PD1	331.25	460.275	5.98	2.32	14.9	0.681
156-4	M	7.7	6113/12775	EL4PD1	418.63	334.703	4.54	2.28	6.71	1.97
157-1	M	7.7	6113/12775	EL4PD1	390.399	331.786	11.6	2.56	4.95	2.55
157-2	M	7.7	6113/12775	EL4PD1	428.674	406.874	6.84	3.98	10.6	4.32
157-3	M	7.7	6113/12775	EL4PD1	372.453	461.439	8.03	1.45	5.16	0.355
167-1	M	14	6113/12775	LLC
168-1	F	14	6113/12775	LLC
169-2	M	12.7	6070/12740	LLC
170-1	F	12.7	6070/12740	LLC
171-2	M	10.9	6113/12775	LLC
172-2	F	10.9	6113/12775	LLC
173-3	M	9	6070/12740	LLC
174-1	F	9	6070/12740	LLC
174-2	F	9	6070/12740	LLC
174-3	F	9	6070/12740	LLC

## Sheet: summary_stats
tumor_model	total_n	ave_age_wks	stdev_age_wks
B16	86	7.32791	0.956421
B16PD1	19	7.47895	0.994194
EL4	58	8.60172	1.74532
EL4PD1	34	7.96765	2.26645
LLC	10	11.12	2.0991
all	207	7.98696	1.76357
tumor_model = all
strain	count	percent		sex	count	percent
6070/12740	122	0.589372		M	116	0.560386
6113/12775	85	0.410628		F	91	0.439614
tumor_model = B16
strain	count	percent		sex	count	percent
6070/12740	52	0.604651		M	51	0.593023
6113/12775	34	0.395349		F	35	0.406977
tumor_model = B16PD1
strain	count	percent		sex	count	percent
6070/12740	12	0.631579		M	8	0.421053
6113/12775	7	0.368421		F	11	0.578947
tumor_model = EL4
strain	count	percent		sex	count	percent
6070/12740	31	0.534483		M	25	0.431034
6113/12775	27	0.465517		F	33	0.568966
tumor_model = EL4PD1
strain	count	percent		sex	count	percent
6070/12740	24	0.705882		M	21	0.617647
6113/12775	10	0.294118		F	13	0.382353
tumor_model = LLC
strain	count	percent		sex	count	percent
6070/12740	8	0.8		M	7	0.7
6113/12775	2	0.2		F	3	0.3
