# Supplementary material for: A Genetic Screen to Identify Gain- and Loss-of-Function Modifications that Enhance T-cell Infiltration into Tumors
Source: Oxford University Press journal article supplement (doi:10.1158/2326-6066.cir-20-0056), 2020-07-01
Supplement: 23266066cir200056-sup-235968_2_supp_6307787_q5m55h.xlsx [file 23266066cir200056-sup-235968_2_supp_6307787_q5m55h.xlsx]

## Sheet: all_gene_candidates
gene_symbol	chr	start (bp)	stop (bp)	strand	# of samples	% of samples	p-value	FDR	# in gene body [+,-]	# in promoter [+,-]	average enrichment score	mice with insertion	prior CD4-Cre SB screen	Human T-ALL
Aak1	chr6	86849517	87003223	+	178	85.9903	1e-300	5.94e-298	178 [44,134]	0 [0,0]	0.969964	ID=EL4PD1_116-2,ID=EL4_41-1,ID=B16PD1_534_3,ID=B16PD1_534_2,ID=B16PD1_534_1,ID=B16_3-4,ID=B16_455-2,ID=B16_455-1,ID=EL4_28_1,ID=EL4_28_2,ID=EL4_28_3,ID=EL4_60-2,ID=B16_488-3,ID=EL4PD1_116-1,ID=EL4_26_4,ID=EL4_63-1,ID=B16_101NT-3,ID=B16_464-1,ID=EL4_60-1,ID=B16_456-4,ID=EL4PD1_156-2,ID=EL4PD1_116-3,ID=B16_487-4,ID=B16_485-3,ID=B16_487-2,ID=EL4PD1_114-3,ID=LLC_173-3,ID=EL4_68-1,ID=B16_498-2,ID=B16_…	NA	NA
Ehhadh	chr16	21761287	21787844	-	64	30.9179	1e-300	5.94e-298	1 [1,0]	63 [0,63]	1	ID=B16PD1_534_3,ID=B16PD1_534_2,ID=B16PD1_534_1,ID=EL4_28_4,ID=B16_455-1,ID=EL4_28_1,ID=EL4_28_2,ID=EL4PD1_116-1,ID=B16_101NT-3,ID=EL4_60-1,ID=B16_487-2,ID=LLC_173-3,ID=EL4_68-1,ID=B16_498-2,ID=B16_4-2,ID=B16_519-3,ID=B16_502-1,ID=B16_452-1,ID=EL4_70-1,ID=B16PD1_533_1,ID=B16PD1_533_2,ID=EL4_22_3,ID=EL4_37_2,ID=B16PD1_537_1,ID=B16PD1_537_2,ID=B16PD1_161-4,ID=EL4_19_2,ID=EL4_34_5,ID=EL4PD1_154-1,ID…	NA	NA
Macrod2	chr2	140395309	142392966	+	41	19.8068	1e-300	5.94e-298	41 [26,15]	0 [0,0]	1	ID=B16_463-1,ID=EL4_28_4,ID=B16_488-3,ID=B16_464-2,ID=B16_464-1,ID=B16_485-1,ID=B16_487-4,ID=EL4PD1_114-3,ID=B16_450-1,ID=B16_498-1,ID=EL4_18_2,ID=B16_502-3,ID=B16_460-1,ID=B16_485-2,ID=B16_474-3,ID=B16_474-4,ID=B16_474-5,ID=EL4_27_3,ID=B16_485-4,ID=EL4_67-2,ID=EL4_64-1,ID=EL4PD1_157-2,ID=B16_489-1,ID=B16_450-3,ID=B16_449-3,ID=B16_499-1,ID=EL4_24_1,ID=B16_451-5,ID=B16_453-2,ID=B16_451-3,ID=B16_46…	NA	NA
Ckb	chr12	111669361	111672338	-	39	18.8406	1e-300	5.94e-298	39 [0,39]	0 [0,0]	0.651329	ID=B16_468-4,ID=B16_455-2,ID=B16_488-3,ID=B16_464-2,ID=B16_464-1,ID=B16_456-4,ID=B16_487-4,ID=B16_519-3,ID=B16_502-1,ID=B16_452-1,ID=B16_460-1,ID=B16_474-4,ID=B16_525-1,ID=B16_485-4,ID=B16_521-2,ID=B16_521-1,ID=B16_517-1,ID=B16_522-2,ID=B16_450-3,ID=B16_449-3,ID=B16_449-4,ID=B16_522-1,ID=B16_451-5,ID=B16_518-2,ID=B16_518-1,ID=B16_461-1,ID=B16_475-1,ID=B16_462-3,ID=B16_469-1,ID=B16_474-1,ID=B16_48…	NA	NA
Rnf214	chr9	45863425	45906869	-	68	32.8502	2.87e-233	1.5e-230	68 [63,5]	0 [0,0]	0.527694	ID=B16_468-4,ID=B16_463-1,ID=B16_455-2,ID=B16_455-1,ID=B16_488-3,ID=B16_101NT-3,ID=B16_464-2,ID=B16_464-1,ID=B16_456-4,ID=B16_485-1,ID=B16_487-4,ID=B16_485-3,ID=B16_487-2,ID=B16_450-1,ID=B16_498-2,ID=B16_519-3,ID=B16_519-1,ID=B16_502-3,ID=B16_452-1,ID=B16_460-1,ID=B16_485-2,ID=B16_474-3,ID=B16_474-4,ID=B16_474-5,ID=B16_497-2,ID=EL4PD1_114-1,ID=B16_486-3,ID=B16_525-2,ID=B16_525-1,ID=B16_485-4,ID=B…	NA	NA
Sprr1b	chr3	92436809	92438789	-	21	10.1449	7.55e-145	3.2e-142	0 [0,0]	21 [21,0]	1	ID=B16PD1_534_3,ID=EL4_28_3,ID=B16_488-3,ID=EL4_18_2,ID=B16PD1_533_1,ID=B16PD1_533_2,ID=EL4_22_3,ID=B16PD1_537_4,ID=B16PD1_537_1,ID=EL4_32_2,ID=B16PD1_531_2,ID=EL4_67-1,ID=B16_521-2,ID=B16PD1_532_1,ID=EL4_70-2,ID=B16_518-2,ID=B16_499-2,ID=EL4_29_2,ID=EL4PD1_152-3,ID=B16_491-3,ID=B16_491-2	NA	NA
Cpd	chr11	76778424	76847018	-	70	33.8164	6.49e-138	2.63e-135	70 [69,1]	0 [0,0]	0.72602	ID=B16_468-4,ID=B16_463-1,ID=B16_455-2,ID=B16_455-1,ID=B16_488-3,ID=B16_101NT-3,ID=B16_464-2,ID=B16_464-1,ID=B16_456-4,ID=B16_485-1,ID=B16_487-4,ID=B16_485-3,ID=B16_487-2,ID=B16_450-1,ID=B16_498-1,ID=B16_519-3,ID=B16_519-1,ID=B16_502-3,ID=B16_502-1,ID=B16_452-1,ID=B16_460-1,ID=B16_485-2,ID=B16_474-3,ID=B16_474-4,ID=B16_474-5,ID=B16_497-1,ID=B16_486-3,ID=B16_525-2,ID=B16_525-1,ID=B16_485-4,ID=B16P…	NA	NA
Rpl48-ps1	chr10	57601393	57601948	+	16	7.72947	3.16e-127	1.23e-124	0 [0,0]	16 [16,0]	0.805975	ID=B16PD1_534_3,ID=EL4_28_1,ID=EL4_28_3,ID=B16_464-1,ID=B16_485-1,ID=B16_485-3,ID=B16_474-4,ID=B16_474-5,ID=EL4_34_5,ID=EL4PD1_157-3,ID=EL4_36_4,ID=B16_1-1,ID=B16_451-5,ID=B16_451-3,ID=B16_474-1,ID=B16_474-2	NA	NA
Son	chr16	91647506	91679207	+	46	22.2222	5.56e-127	2.06e-124	46 [45,1]	0 [0,0]	0.781759	ID=B16_455-2,ID=B16_488-3,ID=B16_101NT-3,ID=B16_456-4,ID=B16_487-4,ID=B16_485-3,ID=B16_487-2,ID=B16_450-1,ID=B16_519-3,ID=B16_519-1,ID=B16_452-1,ID=B16_460-1,ID=B16_474-3,ID=B16_474-5,ID=B16_486-3,ID=B16_525-2,ID=B16_525-1,ID=B16_485-4,ID=B16_521-1,ID=B16_454-3,ID=B16_489-1,ID=B16_522-2,ID=B16_449-3,ID=B16_449-4,ID=B16_522-1,ID=B16_499-1,ID=B16_451-5,ID=B16_453-2,ID=B16_451-3,ID=B16_518-2,ID=B16_…	NA	NA
Eif3b	chr5	140419328	140443360	+	30	14.4928	4.53e-115	1.62e-112	30 [11,19]	0 [0,0]	0.757668	ID=B16_468-4,ID=B16_455-2,ID=B16_455-1,ID=B16_101NT-3,ID=B16_456-4,ID=B16_519-3,ID=B16_519-1,ID=B16_460-1,ID=B16_525-2,ID=B16_521-2,ID=B16_521-1,ID=B16_454-3,ID=B16_517-1,ID=B16_522-2,ID=B16_449-3,ID=B16_449-4,ID=B16_522-1,ID=B16_453-2,ID=B16_518-2,ID=B16_518-1,ID=B16_462-3,ID=B16_469-1,ID=B16_524-2,ID=B16_524-1,ID=B16_451-4,ID=B16_515-2,ID=B16_515-1,ID=B16_516-2,ID=B16_520-2,ID=B16_520-1	NA	NA
Rgs11	chr17	26202951	26211315	+	18	8.69565	2.35e-112	8.06e-110	18 [18,0]	0 [0,0]	0.928158	ID=B16_455-2,ID=B16_455-1,ID=B16_101NT-3,ID=B16_519-3,ID=B16_452-1,ID=B16_454-3,ID=B16_517-1,ID=B16_449-3,ID=B16_522-1,ID=B16_453-2,ID=B16_518-1,ID=B16_462-4,ID=B16_484-1,ID=B16_515-2,ID=B16_515-1,ID=B16_516-2,ID=B16_520-2,ID=B16_474-2	NA	NA
Arhgdig	chr17	26199436	26207786	-	18	8.69565	1.43e-106	4.71e-104	18 [18,0]	0 [0,0]	0.928158	ID=B16_455-2,ID=B16_455-1,ID=B16_101NT-3,ID=B16_519-3,ID=B16_452-1,ID=B16_454-3,ID=B16_517-1,ID=B16_449-3,ID=B16_522-1,ID=B16_453-2,ID=B16_518-1,ID=B16_462-4,ID=B16_484-1,ID=B16_515-2,ID=B16_515-1,ID=B16_516-2,ID=B16_520-2,ID=B16_474-2	NA	NA
Vapa	chr17	65580056	65613555	-	45	21.7391	4.25e-103	1.35e-100	45 [19,26]	0 [0,0]	0.990565	ID=EL4_41-1,ID=EL4_28_4,ID=EL4_28_2,ID=B16_488-3,ID=EL4PD1_116-1,ID=B16_487-4,ID=EL4_68-1,ID=B16_519-1,ID=B16_452-1,ID=EL4_32_1,ID=B16PD1_533_1,ID=B16PD1_533_2,ID=B16PD1_533_3,ID=EL4_22_3,ID=B16PD1_537_2,ID=B16_16-3,ID=EL4_19_2,ID=EL4_27_3,ID=EL4_34_5,ID=EL4_55-2,ID=EL4_32_2,ID=B16PD1_531_1,ID=EL4_64-2,ID=EL4_64-1,ID=EL4_25_3,ID=B16PD1_532_2,ID=EL4_36_4,ID=B16_454-3,ID=EL4_36_3,ID=B16_2-2,ID=B16_…	NA	NA
Ahcy	chr2	155059310	155074497	-	26	12.5604	1.56e-99	4.81e-97	26 [26,0]	0 [0,0]	0.781609	ID=B16_463-1,ID=B16_455-2,ID=B16_456-4,ID=B16_487-4,ID=B16_485-3,ID=B16_498-2,ID=B16_519-1,ID=B16_452-1,ID=B16_474-5,ID=B16_521-2,ID=B16_517-1,ID=B16_449-3,ID=B16_522-1,ID=B16_453-2,ID=B16_451-3,ID=B16_518-2,ID=B16_518-1,ID=B16_475-2,ID=B16_462-3,ID=B16_484-4,ID=B16_524-1,ID=B16_499-2,ID=B16_491-3,ID=B16_520-2,ID=B16_520-1,ID=B16_474-2	NA	NA
Il1rapl1	chrX	86740870	88115645	-	47	22.7053	4.86e-71	1.27e-68	47 [29,18]	0 [0,0]	0.985334	ID=B16_463-1,ID=EL4_28_4,ID=EL4_28_1,ID=EL4_28_2,ID=B16_488-3,ID=B16_464-1,ID=B16_456-4,ID=EL4PD1_116-3,ID=B16_485-1,ID=B16_485-3,ID=EL4_68-1,ID=LLC_168-1,ID=EL4_18_2,ID=B16_502-3,ID=B16_460-1,ID=EL4_22_3,ID=EL4PD1_104-1,ID=B16_474-3,ID=B16_474-4,ID=B16_497-1,ID=EL4_19_2,ID=EL4_27_3,ID=EL4_34_5,ID=EL4_55-2,ID=EL4_33_2,ID=EL4_52-5,ID=EL4_67-2,ID=EL4_25_3,ID=EL4_36_3,ID=EL4_36_2,ID=B16_489-1,ID=B16…	NA	NA
Ube2cbp	chr9	86307306	86464950	-	79	38.1643	1.9e-69	4.83e-67	78 [48,30]	1 [0,1]	0.962886	ID=EL4PD1_116-2,ID=B16_3-4,ID=B16_455-2,ID=B16_455-1,ID=EL4_28_3,ID=EL4_60-2,ID=B16_488-3,ID=B16_464-2,ID=B16_464-1,ID=B16_456-4,ID=B16_485-1,ID=B16_485-3,ID=B16_450-1,ID=EL4PD1_149-4,ID=B16_4-2,ID=B16_519-1,ID=B16_502-3,ID=B16_502-1,ID=B16_460-1,ID=EL4_32_1,ID=B16_12-3,ID=B16PD1_537_1,ID=B16_485-2,ID=B16_16-3,ID=B16_16-2,ID=B16_16-1,ID=B16_474-3,ID=B16_474-4,ID=B16_474-5,ID=B16_16-4,ID=B16_497-1…	NA	NA
Hif1an	chr19	44562850	44576274	+	21	10.1449	5.84e-67	1.45e-64	20 [20,0]	1 [1,0]	0.867417	ID=B16_463-1,ID=B16_455-2,ID=B16_456-4,ID=B16_487-4,ID=B16_485-3,ID=B16_519-1,ID=B16_452-1,ID=B16_474-4,ID=B16_474-5,ID=B16_521-2,ID=B16_517-1,ID=B16_450-3,ID=B16_449-3,ID=B16_522-1,ID=B16_451-5,ID=B16_453-2,ID=B16_518-2,ID=B16_518-1,ID=B16_475-2,ID=B16_462-3,ID=B16_520-2	NA	NA
Sall1	chr8	89027235	89044162	-	20	9.66184	5.66e-64	1.36e-61	20 [17,3]	0 [0,0]	1	ID=EL4_28_1,ID=EL4_60-1,ID=EL4PD1_156-2,ID=EL4_70-1,ID=EL4_27_3,ID=EL4_48-4,ID=EL4_32_2,ID=EL4_52-5,ID=EL4_70-3,ID=EL4_47-1,ID=EL4PD1_117-3,ID=EL4PD1_119-1,ID=EL4PD1_118-1,ID=B16_524-1,ID=EL4_54-4,ID=B16_499-2,ID=EL4_29_2,ID=B16_515-2,ID=EL4_61-2,ID=LLC_167-1	NA	NA
Pigz	chr16	31933851	31946046	+	17	8.21256	2.55e-61	5.99e-59	16 [11,5]	1 [1,0]	1	ID=EL4PD1_116-1,ID=B16_464-2,ID=EL4_60-1,ID=B16_487-4,ID=LLC_172-2,ID=B16PD1_533_2,ID=EL4_37_2,ID=EL4_19_2,ID=EL4_34_5,ID=B16PD1_531_2,ID=EL4_67-3,ID=EL4_64-1,ID=B16PD1_532_1,ID=EL4PD1_104-3,ID=EL4PD1_117-1,ID=B16_451-4,ID=EL4PD1_152-3	NA	NA
Fhit	chr14	9550100	11162035	-	40	19.3237	3.29e-61	7.52e-59	40 [17,23]	0 [0,0]	1	ID=B16_463-1,ID=B16_488-3,ID=B16_464-2,ID=B16_464-1,ID=B16_485-1,ID=EL4_68-1,ID=B16_450-1,ID=B16_498-2,ID=B16_498-1,ID=LLC_172-2,ID=B16_502-3,ID=B16_460-1,ID=EL4_22_3,ID=B16PD1_537_1,ID=B16_485-2,ID=B16_474-3,ID=B16_474-4,ID=B16_474-5,ID=B16_497-1,ID=EL4_19_2,ID=B16_497-2,ID=EL4_59-1,ID=B16_486-3,ID=EL4PD1_150-2,ID=B16_485-4,ID=B16PD1_531_2,ID=B16_521-2,ID=EL4_36_4,ID=B16_489-1,ID=B16_450-3,ID=B1…	NA	NA
Cd207	chr6	83671215	83677857	-	15	7.24638	1.25e-59	2.77e-57	5 [0,5]	10 [10,0]	0.967121	ID=EL4_28_4,ID=EL4_28_1,ID=EL4_28_2,ID=EL4_28_3,ID=EL4_26_4,ID=EL4_18_2,ID=B16_502-3,ID=EL4_32_1,ID=EL4_22_3,ID=B16PD1_537_4,ID=EL4_27_3,ID=EL4_32_3,ID=EL4_33_2,ID=EL4_32_2,ID=EL4_24_1	NA	NA
Fam69a	chr5	107908053	107987085	-	49	23.6715	2.53e-58	5.51e-56	49 [19,30]	0 [0,0]	1	ID=EL4_41-1,ID=B16PD1_534_3,ID=B16PD1_534_2,ID=B16PD1_534_1,ID=EL4_28_1,ID=EL4_28_2,ID=B16_488-3,ID=EL4_26_4,ID=EL4_60-1,ID=EL4PD1_116-3,ID=B16_487-2,ID=EL4_68-1,ID=EL4_18_2,ID=B16_4-2,ID=B16PD1_533_3,ID=EL4_22_3,ID=B16_12-3,ID=B16PD1_537_1,ID=B16_16-3,ID=EL4_19_2,ID=EL4_32_3,ID=EL4PD1_114-1,ID=EL4PD1_150-2,ID=EL4PD1_153-3,ID=EL4_52-5,ID=B16PD1_531_1,ID=EL4_67-3,ID=EL4_64-5,ID=B16_521-1,ID=B16PD1…	NA	NA
A530032D15Rik	chr1	85083069	85109449	-	26	12.5604	9.53e-57	1.98e-54	24 [9,15]	2 [0,2]	0.978533	ID=EL4PD1_116-2,ID=EL4_41-1,ID=B16_463-1,ID=EL4_28_4,ID=EL4_28_1,ID=EL4_60-2,ID=EL4_45-1,ID=EL4_46-2,ID=EL4_59-1,ID=EL4PD1_150-3,ID=EL4PD1_150-2,ID=EL4PD1_154-1,ID=EL4_67-1,ID=EL4_67-2,ID=EL4_64-5,ID=EL4_64-2,ID=EL4_64-1,ID=EL4_43-2,ID=EL4PD1_156-4,ID=B16_489-1,ID=LLC_174-3,ID=EL4_65-1,ID=EL4_44-2,ID=EL4_47-1,ID=EL4_62-1,ID=EL4_61-2	NA	NA
Grid2	chr6	63256027	64668285	+	44	21.256	1.23e-56	2.49e-54	44 [24,20]	0 [0,0]	0.988627	ID=B16_463-1,ID=B16_488-3,ID=EL4PD1_116-1,ID=B16_464-2,ID=B16_464-1,ID=B16_485-1,ID=B16_487-4,ID=B16_485-3,ID=B16_487-2,ID=B16_450-1,ID=B16_498-1,ID=B16_502-3,ID=EL4_49-1,ID=B16_460-1,ID=B16PD1_533_1,ID=B16_485-2,ID=B16PD1_161-4,ID=B16_474-3,ID=B16_474-4,ID=B16_474-5,ID=B16_497-1,ID=B16_497-2,ID=EL4_27_3,ID=EL4_32_3,ID=B16_486-3,ID=EL4_55-2,ID=EL4_67-2,ID=EL4_36_3,ID=B16_489-1,ID=B16_499-1,ID=B16…	NA	NA
Magi2	chr5	19227055	20704773	+	38	18.3575	1.28e-56	2.54e-54	38 [18,20]	0 [0,0]	1	ID=B16_463-1,ID=EL4_28_3,ID=B16_488-3,ID=B16_464-2,ID=B16_464-1,ID=B16_487-4,ID=B16_450-1,ID=EL4_18_2,ID=B16_502-3,ID=B16_460-1,ID=B16_485-2,ID=B16_474-3,ID=B16_474-4,ID=B16_474-5,ID=EL4PD1_114-1,ID=EL4_34_5,ID=EL4_55-2,ID=EL4PD1_150-3,ID=EL4_36_3,ID=B16_489-1,ID=B16_450-3,ID=B16_499-1,ID=B16_13-1,ID=EL4_24_1,ID=B16_451-5,ID=B16_453-2,ID=B16_475-2,ID=B16_462-4,ID=B16PD1_160-2,ID=B16_474-1,ID=B16_…	NA	NA
Csmd3	chr15	47580638	48791989	-	33	15.942	4.89e-56	9.48e-54	33 [17,16]	0 [0,0]	1	ID=B16_463-1,ID=EL4_60-2,ID=B16_488-3,ID=B16_464-2,ID=B16_464-1,ID=B16_487-4,ID=B16_485-3,ID=B16_487-2,ID=B16_450-1,ID=B16_498-1,ID=EL4_18_2,ID=B16_502-3,ID=B16_460-1,ID=B16_474-3,ID=B16_474-4,ID=B16_497-1,ID=EL4_55-2,ID=B16_485-4,ID=B16PD1_531_1,ID=B16_489-1,ID=B16_450-3,ID=B16_499-1,ID=EL4_24_1,ID=B16_462-4,ID=EL4_62-1,ID=B16_474-1,ID=LLC_170-1,ID=B16_484-1,ID=EL4PD1_118-1,ID=B16_499-2,ID=B16_4…	NA	NA
Lpcat4	chr2	112239468	112247111	+	14	6.76329	4.24e-55	8.04e-53	14 [0,14]	0 [0,0]	1	ID=EL4_41-1,ID=B16_488-3,ID=EL4PD1_116-1,ID=EL4_60-1,ID=EL4_22_3,ID=EL4_27_3,ID=B16PD1_531_1,ID=EL4_64-2,ID=B16_521-2,ID=B16_522-1,ID=B16_474-1,ID=B16_491-3,ID=B16_516-2,ID=LLC_167-1	NA	NA
Adamtsl3	chr7	82335732	82614450	+	93	44.9275	5e-55	9.28e-53	93 [83,10]	0 [0,0]	0.934103	ID=EL4_41-1,ID=B16PD1_534_3,ID=B16PD1_534_2,ID=B16_3-4,ID=EL4_28_4,ID=EL4_28_1,ID=EL4_28_2,ID=EL4_28_3,ID=B16_488-3,ID=EL4_26_4,ID=EL4_63-1,ID=B16_101NT-3,ID=B16_464-2,ID=EL4_60-1,ID=EL4PD1_116-3,ID=B16_487-4,ID=B16_487-2,ID=LLC_173-3,ID=EL4_68-1,ID=B16_498-2,ID=B16_498-1,ID=LLC_168-1,ID=LLC_172-2,ID=EL4_18_2,ID=B16_519-3,ID=B16_502-3,ID=EL4_49-1,ID=B16_452-1,ID=EL4_32_1,ID=EL4_45-1,ID=B16PD1_533…	NA	NA
Csmd1	chr8	15892537	17535281	-	50	24.1546	4.79e-53	8.53e-51	50 [26,24]	0 [0,0]	0.97425	ID=B16_463-1,ID=EL4_28_4,ID=EL4_28_2,ID=EL4_28_3,ID=EL4_60-2,ID=B16_488-3,ID=B16_101NT-3,ID=B16_464-2,ID=B16_464-1,ID=EL4PD1_116-3,ID=B16_485-1,ID=B16_487-4,ID=B16_485-3,ID=B16_487-2,ID=B16_498-2,ID=EL4_18_2,ID=B16_519-3,ID=B16_519-1,ID=B16_502-3,ID=B16_460-1,ID=EL4_22_3,ID=B16_485-2,ID=B16_474-3,ID=B16_474-4,ID=B16_497-1,ID=B16_497-2,ID=EL4_27_3,ID=EL4_32_3,ID=EL4_48-4,ID=EL4_67-3,ID=EL4_64-1,ID…	NA	NA
Nrxn3	chr12	88722986	90332878	+	60	28.9855	1.06e-52	1.85e-50	60 [40,20]	0 [0,0]	0.985448	ID=B16_463-1,ID=B16_455-2,ID=B16_488-3,ID=B16_464-2,ID=B16_464-1,ID=B16_456-4,ID=B16_487-4,ID=B16_450-1,ID=B16_498-1,ID=EL4_18_2,ID=B16_519-3,ID=B16_502-3,ID=B16_502-1,ID=EL4_49-1,ID=B16_452-1,ID=B16_460-1,ID=EL4_45-1,ID=EL4_37_2,ID=B16PD1_537_2,ID=B16_474-3,ID=B16_474-4,ID=B16_16-4,ID=EL4_19_2,ID=B16_497-2,ID=EL4_48-4,ID=EL4_34_5,ID=EL4PD1_150-2,ID=EL4PD1_154-1,ID=EL4_67-2,ID=B16_521-2,ID=EL4_36…	NA	NA
Ctnna3	chr10	63430098	65002965	+	57	27.5362	2.64e-49	4.52e-47	57 [38,19]	0 [0,0]	0.997403	ID=B16_463-1,ID=B16PD1_534_3,ID=B16PD1_534_1,ID=B16_464-2,ID=B16_464-1,ID=B16_485-1,ID=B16_487-4,ID=B16_487-2,ID=B16_498-1,ID=B16_502-3,ID=EL4_49-1,ID=B16_452-1,ID=B16_460-1,ID=B16PD1_533_3,ID=EL4_46-2,ID=B16PD1_537_1,ID=B16_485-2,ID=B16_16-2,ID=B16_474-3,ID=B16_474-4,ID=EL4PD1_115-2,ID=EL4_55-2,ID=EL4PD1_153-3,ID=B16_485-4,ID=EL4_39-4,ID=EL4_64-5,ID=B16_521-1,ID=EL4_25_3,ID=B16PD1_532_1,ID=EL4_3…	NA	NA
Snrnp35	chr5	124483134	124491124	+	14	6.76329	9.51e-49	1.6e-46	12 [12,0]	2 [-2,4]	0.923672	ID=EL4_28_4,ID=EL4_28_1,ID=EL4_28_3,ID=EL4_26_4,ID=EL4_18_2,ID=EL4_22_3,ID=B16PD1_537_1,ID=EL4_19_2,ID=EL4_27_3,ID=EL4_32_3,ID=EL4_33_2,ID=EL4_25_3,ID=EL4_29_2,ID=B16_491-3	NA	NA
Gpc5	chr14	115092250	116525179	+	50	24.1546	6.91e-48	1.12e-45	50 [16,34]	0 [0,0]	0.983643	ID=B16_463-1,ID=B16_455-1,ID=B16_488-3,ID=B16_464-2,ID=B16_464-1,ID=B16_487-4,ID=EL4PD1_114-3,ID=B16_450-1,ID=B16_498-1,ID=EL4_18_2,ID=B16_460-1,ID=EL4PD1_104-1,ID=B16_12-3,ID=B16_485-2,ID=B16_16-2,ID=B16_474-3,ID=B16_474-4,ID=B16_16-4,ID=B16_497-1,ID=B16_497-2,ID=B16_486-3,ID=B16_525-2,ID=B16_525-1,ID=B16_485-4,ID=EL4_52-5,ID=EL4_67-2,ID=B16_521-2,ID=EL4_64-1,ID=B16_1-2,ID=B16_489-1,ID=B16_1-1,I…	NA	NA
Kif5b	chr18	6201002	6241523	-	35	16.9082	2.12e-47	3.38e-45	34 [31,3]	1 [1,0]	0.827387	ID=B16_455-2,ID=B16_455-1,ID=B16_488-3,ID=B16_456-4,ID=B16_485-1,ID=B16_487-4,ID=B16_487-2,ID=B16_498-1,ID=B16_519-1,ID=B16_474-5,ID=B16_525-2,ID=B16_525-1,ID=B16_521-1,ID=B16_454-3,ID=B16_517-1,ID=B16_489-1,ID=B16_522-2,ID=B16_450-3,ID=B16_449-3,ID=B16_449-4,ID=B16_522-1,ID=B16_453-2,ID=B16_451-3,ID=B16_518-2,ID=B16_518-1,ID=B16_475-1,ID=B16_474-1,ID=B16_484-2,ID=B16_524-2,ID=B16_451-4,ID=B16_51…	NA	NA
L3mbtl1	chr2	162943474	162974522	+	23	11.1111	2.05e-45	3.21e-43	2 [0,2]	21 [0,21]	0.84288	ID=B16_463-1,ID=B16_455-2,ID=B16_456-4,ID=B16_498-1,ID=B16_519-1,ID=B16_452-1,ID=B16_486-3,ID=B16_521-2,ID=B16_517-1,ID=B16_449-3,ID=B16_522-1,ID=B16_499-1,ID=B16_453-2,ID=B16_518-2,ID=B16_518-1,ID=B16_475-2,ID=B16_462-3,ID=B16_484-1,ID=B16_524-1,ID=B16_499-2,ID=B16_491-3,ID=B16_520-2,ID=B16_520-1	NA	NA
Aldoart1	chr4	72850583	72852634	-	11	5.31401	1.67e-44	2.57e-42	4 [1,3]	7 [4,3]	1	ID=B16_464-2,ID=B16_502-3,ID=B16_474-4,ID=EL4_59-1,ID=B16_489-1,ID=B16_451-3,ID=B16_462-4,ID=B16_484-4,ID=B16_484-1,ID=B16_499-2,ID=B16_491-3	NA	NA
Il1rapl2	chrX	137570608	138846946	+	39	18.8406	3.91e-44	5.91e-42	39 [19,20]	0 [0,0]	0.999937	ID=B16_463-1,ID=B16_488-3,ID=B16_464-2,ID=B16_464-1,ID=EL4PD1_156-2,ID=EL4PD1_116-3,ID=B16_487-4,ID=B16_487-2,ID=EL4PD1_114-3,ID=EL4_68-1,ID=B16_498-1,ID=EL4_18_2,ID=B16_502-3,ID=B16_460-1,ID=EL4_37_2,ID=B16_16-3,ID=B16_474-3,ID=B16_474-4,ID=EL4_19_2,ID=EL4PD1_114-1,ID=B16_486-3,ID=EL4_33_2,ID=EL4_32_2,ID=EL4PD1_150-2,ID=B16_521-1,ID=EL4_64-1,ID=EL4_36_4,ID=EL4_36_2,ID=B16_489-1,ID=B16_522-2,ID=B…	NA	NA
Lrrc4c	chr2	96318169	97631666	+	48	23.1884	3.09e-43	4.59e-41	48 [15,33]	0 [0,0]	0.988968	ID=B16_463-1,ID=B16PD1_534_3,ID=B16_3-4,ID=EL4_28_4,ID=B16_455-1,ID=EL4_28_3,ID=B16_488-3,ID=EL4_26_4,ID=B16_464-2,ID=B16_464-1,ID=B16_485-3,ID=B16_487-2,ID=B16_498-2,ID=B16_4-2,ID=B16_502-3,ID=B16_460-1,ID=B16_12-3,ID=B16PD1_537_1,ID=B16_16-1,ID=B16_474-3,ID=B16_474-4,ID=B16_497-1,ID=B16_486-3,ID=EL4PD1_150-3,ID=B16_525-2,ID=EL4_64-5,ID=B16_454-3,ID=EL4_36_3,ID=B16_2-2,ID=EL4_38_3,ID=B16_1-2,ID=…	NA	NA
Dlg2	chr7	91090706	92449247	+	46	22.2222	1.74e-40	2.55e-38	46 [22,24]	0 [0,0]	1	ID=B16_463-1,ID=EL4_28_4,ID=B16_488-3,ID=EL4_63-1,ID=B16_464-2,ID=B16_464-1,ID=EL4PD1_116-3,ID=B16_485-1,ID=B16_487-4,ID=EL4PD1_114-3,ID=LLC_173-3,ID=B16_498-2,ID=B16_498-1,ID=B16_502-3,ID=B16_502-1,ID=B16_460-1,ID=EL4_32_1,ID=EL4_45-1,ID=B16PD1_533_1,ID=B16PD1_537_4,ID=B16_474-3,ID=B16_474-4,ID=B16_497-1,ID=EL4PD1_113-2,ID=EL4_32_3,ID=EL4PD1_115-2,ID=EL4_52-5,ID=B16PD1_531_1,ID=EL4_67-2,ID=B16_4…	NA	NA
Ccser1	chr6	61180324	62382865	+	37	17.8744	5.2e-39	7.47e-37	37 [24,13]	0 [0,0]	1	ID=B16_463-1,ID=EL4_60-2,ID=B16_488-3,ID=EL4_26_4,ID=B16_464-2,ID=B16_464-1,ID=B16_487-2,ID=B16_498-2,ID=B16_498-1,ID=B16_502-1,ID=B16_460-1,ID=B16PD1_533_2,ID=B16PD1_537_4,ID=B16_485-2,ID=B16_474-3,ID=B16_474-4,ID=B16_474-5,ID=B16_497-1,ID=EL4PD1_114-1,ID=EL4_34_5,ID=EL4PD1_115-3,ID=EL4_67-2,ID=EL4_36_3,ID=EL4_38_3,ID=B16_522-2,ID=B16_450-3,ID=B16_499-1,ID=B16_451-5,ID=EL4PD1_118-2,ID=LLC_169-2,…	NA	NA
Ibtk	chr9	85687360	85749334	-	38	18.3575	2.7e-38	3.82e-36	37 [25,12]	1 [0,1]	0.991301	ID=B16_463-1,ID=B16_455-1,ID=B16_488-3,ID=EL4_63-1,ID=B16_464-2,ID=B16_456-4,ID=B16_485-3,ID=LLC_173-3,ID=EL4PD1_149-4,ID=B16_4-2,ID=B16_502-3,ID=B16_12-3,ID=B16_485-2,ID=B16_16-2,ID=B16_16-1,ID=B16_474-3,ID=B16_474-4,ID=EL4_55-2,ID=EL4_52-5,ID=B16_454-3,ID=EL4PD1_156-3,ID=B16_1-2,ID=B16_489-1,ID=B16_450-3,ID=B16_13-3,ID=B16_451-5,ID=B16_451-3,ID=B16_5-2,ID=B16_462-4,ID=B16PD1_160-2,ID=EL4PD1_152…	NA	NA
Zfp982	chr4	147492417	147513486	+	22	10.628	1.02e-36	1.42e-34	19 [6,13]	3 [0,3]	0.981708	ID=B16PD1_534_3,ID=EL4_28_4,ID=EL4_26_4,ID=B16_464-2,ID=B16_464-1,ID=B16_485-1,ID=B16_502-3,ID=B16_460-1,ID=EL4_22_3,ID=B16_474-3,ID=B16_474-4,ID=EL4_33_2,ID=EL4_32_2,ID=EL4_36_2,ID=B16_451-3,ID=B16_475-1,ID=B16_462-4,ID=B16_474-1,ID=B16_484-4,ID=EL4PD1_117-3,ID=B16_499-2,ID=B16_491-3	NA	NA
Entpd7	chr19	43689672	43733697	+	26	12.5604	3.4e-36	4.66e-34	26 [26,0]	0 [0,0]	0.804398	ID=B16_455-2,ID=B16_455-1,ID=B16_488-3,ID=B16_456-4,ID=B16_519-3,ID=B16_519-1,ID=B16_485-2,ID=B16_486-3,ID=B16_525-2,ID=B16_525-1,ID=B16_521-1,ID=B16_454-3,ID=B16_517-1,ID=B16_489-1,ID=B16_449-3,ID=B16_449-4,ID=B16_522-1,ID=B16_451-5,ID=B16_453-2,ID=B16_484-4,ID=B16_524-1,ID=B16_451-4,ID=B16_515-2,ID=B16_515-1,ID=B16_516-2,ID=B16_520-2	NA	NA
Olfr369-ps1	chr9	3233346	3236427	+	12	5.7971	3.7e-36	5e-34	8 [8,0]	4 [0,4]	0.908507	ID=EL4_28_4,ID=EL4_28_1,ID=EL4_28_2,ID=EL4_26_4,ID=EL4_18_2,ID=EL4_32_1,ID=B16PD1_537_4,ID=EL4_19_2,ID=B16_497-2,ID=EL4_27_3,ID=EL4_29_2,ID=B16_491-3	NA	NA
Sfi1	chr11	3131881	3193463	-	31	14.9758	5.98e-35	7.84e-33	27 [13,14]	4 [5,-1]	0.977952	ID=B16_463-1,ID=B16_455-2,ID=EL4_28_1,ID=B16_488-3,ID=EL4_63-1,ID=B16_464-1,ID=LLC_173-3,ID=B16_450-1,ID=B16_498-1,ID=B16_502-3,ID=EL4_49-1,ID=B16_460-1,ID=B16_474-3,ID=B16_474-4,ID=EL4_32_3,ID=B16_486-3,ID=EL4PD1_150-2,ID=B16_485-4,ID=EL4_64-1,ID=B16_489-1,ID=B16_449-3,ID=B16_449-4,ID=B16_499-1,ID=EL4_24_1,ID=B16_451-5,ID=B16_453-2,ID=B16_462-3,ID=B16_462-4,ID=EL4_62-1,ID=B16_474-1,ID=B16_484-2	NA	NA
AC153863.2	chr10	44169577	44170354	-	8	3.86473	2.45e-34	3.16e-32	1 [0,1]	7 [0,7]	0.772412	ID=B16_455-2,ID=B16_16-1,ID=B16_16-4,ID=B16_525-2,ID=B16_1-2,ID=B16_13-3,ID=B16_451-3,ID=B16_17-3	NA	NA
Sgcz	chr8	37522298	38661508	-	41	19.8068	4.67e-34	5.86e-32	41 [17,24]	0 [0,0]	0.981085	ID=EL4PD1_116-2,ID=B16_463-1,ID=B16PD1_534_3,ID=B16_488-3,ID=B16_464-2,ID=B16_464-1,ID=EL4_60-1,ID=B16_485-1,ID=B16_487-4,ID=B16_485-3,ID=EL4PD1_114-3,ID=EL4_68-1,ID=B16_498-1,ID=EL4_18_2,ID=B16_4-2,ID=B16_502-3,ID=B16_460-1,ID=EL4_32_1,ID=EL4_22_3,ID=B16_485-2,ID=B16_474-3,ID=B16_474-4,ID=B16_16-4,ID=B16_497-2,ID=EL4_32_2,ID=EL4_67-2,ID=EL4_36_3,ID=B16_2-2,ID=B16_489-1,ID=B16_449-4,ID=B16_499-1,…	NA	NA
Galntl6	chr8	57774052	58912640	-	32	15.4589	1.58e-33	1.96e-31	32 [23,9]	0 [0,0]	0.984895	ID=B16_488-3,ID=B16_464-2,ID=B16_464-1,ID=B16_485-1,ID=B16_450-1,ID=B16_498-1,ID=B16_502-3,ID=B16_460-1,ID=B16_474-3,ID=B16_474-4,ID=EL4_27_3,ID=EL4_32_3,ID=B16_486-3,ID=EL4PD1_157-3,ID=EL4PD1_113-1,ID=EL4_67-4,ID=EL4_64-1,ID=EL4PD1_157-1,ID=B16_489-1,ID=EL4_70-2,ID=B16_499-1,ID=EL4_24_1,ID=B16_451-5,ID=B16_518-1,ID=B16_462-4,ID=LLC_174-1,ID=EL4_47-1,ID=B16_469-1,ID=EL4_62-1,ID=B16_474-1,ID=B16_4…	NA	NA
Nkain2	chr10	31689310	32890461	-	37	17.8744	2.74e-33	3.35e-31	37 [19,18]	0 [0,0]	1	ID=B16_463-1,ID=EL4_60-2,ID=B16_488-3,ID=B16_464-2,ID=B16_464-1,ID=B16_487-2,ID=LLC_173-3,ID=B16_450-1,ID=B16_498-1,ID=B16_502-3,ID=B16_460-1,ID=EL4_37_2,ID=B16_485-2,ID=B16_474-3,ID=B16_474-4,ID=B16_474-5,ID=B16_497-1,ID=EL4PD1_115-3,ID=EL4_67-1,ID=EL4_67-2,ID=EL4_64-5,ID=B16_521-1,ID=EL4_64-1,ID=EL4_36_3,ID=B16_1-2,ID=B16_489-1,ID=B16_450-3,ID=B16_499-1,ID=B16_451-5,ID=B16_475-1,ID=B16_462-4,ID…	NA	NA
Dcc	chr18	71258738	72351069	-	31	14.9758	3.51e-32	4.23e-30	31 [18,13]	0 [0,0]	0.991167	ID=B16_463-1,ID=B16_488-3,ID=B16_464-2,ID=B16_464-1,ID=B16_487-4,ID=B16_485-3,ID=B16_450-1,ID=B16_502-3,ID=B16_460-1,ID=B16_485-2,ID=B16_474-3,ID=B16_474-4,ID=B16_497-1,ID=EL4_27_3,ID=B16_486-3,ID=EL4_32_2,ID=EL4PD1_150-2,ID=B16_485-4,ID=EL4_36_3,ID=B16_489-1,ID=B16_450-3,ID=B16_449-4,ID=B16_499-1,ID=B16_451-5,ID=B16_451-3,ID=B16_518-1,ID=B16_462-4,ID=B16_484-1,ID=B16_484-2,ID=EL4_54-2,ID=EL4_29_2	NA	NA
Prkg1	chr19	30567551	31765033	-	29	14.0097	3.65e-32	4.34e-30	28 [13,15]	1 [0,1]	1	ID=B16_463-1,ID=EL4_28_4,ID=B16_464-2,ID=B16_464-1,ID=B16_485-1,ID=B16_485-3,ID=EL4PD1_149-4,ID=B16_502-3,ID=B16_460-1,ID=B16_485-2,ID=B16_474-3,ID=B16_474-4,ID=B16_497-1,ID=EL4_55-2,ID=EL4_36_3,ID=EL4PD1_157-2,ID=B16_499-1,ID=B16_453-2,ID=B16_451-3,ID=EL4_48-1,ID=B16_461-1,ID=B16_462-4,ID=EL4_65-1,ID=EL4_62-1,ID=B16_474-1,ID=LLC_170-1,ID=B16_499-2,ID=B16_491-3,ID=B16_491-2	NA	NA
Pde4d	chr13	108654177	109951474	+	38	18.3575	1.29e-31	1.5e-29	38 [15,23]	0 [0,0]	0.999883	ID=B16_463-1,ID=B16_488-3,ID=B16_101NT-3,ID=B16_464-2,ID=B16_464-1,ID=B16_485-1,ID=B16_487-4,ID=B16_485-3,ID=B16_487-2,ID=B16_498-1,ID=EL4_18_2,ID=B16_502-3,ID=B16_460-1,ID=B16_485-2,ID=B16_474-3,ID=B16_474-4,ID=B16_474-5,ID=B16_497-1,ID=B16_486-3,ID=EL4PD1_115-3,ID=EL4_55-2,ID=B16_485-4,ID=EL4PD1_157-2,ID=B16_489-1,ID=B16_450-3,ID=EL4_70-3,ID=B16_499-1,ID=B16_451-3,ID=B16_475-2,ID=B16_462-4,ID=E…	NA	NA
Kcnip4	chr5	48389502	49524907	-	35	16.9082	3.96e-30	4.41e-28	35 [16,19]	0 [0,0]	1	ID=B16_463-1,ID=B16_488-3,ID=EL4_63-1,ID=B16_464-2,ID=B16_464-1,ID=B16_485-1,ID=B16_487-4,ID=B16_487-2,ID=B16_498-2,ID=EL4_18_2,ID=B16_519-3,ID=B16_502-3,ID=EL4_45-1,ID=B16_474-3,ID=B16_474-4,ID=EL4_59-1,ID=B16_486-3,ID=EL4_55-2,ID=B16_485-4,ID=EL4_36_3,ID=B16_489-1,ID=B16_450-3,ID=B16_499-1,ID=B16_13-1,ID=B16_451-5,ID=B16_453-2,ID=B16_462-4,ID=EL4_62-1,ID=B16_484-1,ID=B16_484-2,ID=EL4_72-3,ID=B1…	NA	NA
Vmn2r-ps20	chr4	147521531	147521912	+	8	3.86473	1.1e-29	1.21e-27	0 [0,0]	8 [6,2]	1	ID=EL4_28_4,ID=B16_488-3,ID=B16_450-1,ID=B16_460-1,ID=EL4_32_1,ID=B16_485-4,ID=B16_484-1,ID=B16_451-4	NA	NA
Nrxn1	chr17	90033644	91093071	-	30	14.4928	5.95e-29	6.39e-27	30 [16,14]	0 [0,0]	0.986161	ID=EL4PD1_116-2,ID=B16_463-1,ID=EL4_28_2,ID=EL4_28_3,ID=B16_488-3,ID=B16_464-2,ID=B16_464-1,ID=B16_485-1,ID=B16_487-4,ID=EL4PD1_114-3,ID=B16_498-1,ID=B16_502-3,ID=B16_460-1,ID=B16_485-2,ID=B16_474-3,ID=B16_474-4,ID=EL4_19_2,ID=EL4_32_3,ID=EL4PD1_113-1,ID=EL4PD1_154-1,ID=EL4_67-2,ID=EL4_25_3,ID=EL4_36_3,ID=B16_489-1,ID=B16_449-4,ID=B16_499-1,ID=B16_462-4,ID=B16_484-2,ID=B16_499-2,ID=B16_491-3	NA	NA
Scn8a	chr15	100870683	101045929	+	50	24.1546	1.13e-28	1.19e-26	50 [49,1]	0 [0,0]	0.641734	ID=B16_468-4,ID=B16_463-1,ID=B16_455-2,ID=B16_488-3,ID=B16_464-2,ID=B16_464-1,ID=B16_456-4,ID=B16_487-4,ID=B16_485-3,ID=B16_487-2,ID=B16_498-2,ID=B16_519-3,ID=B16_519-1,ID=B16_452-1,ID=B16_460-1,ID=B16_485-2,ID=B16_474-4,ID=B16_474-5,ID=B16_486-3,ID=B16_525-1,ID=B16_521-2,ID=B16_521-1,ID=B16_454-3,ID=B16_517-1,ID=B16_489-1,ID=B16_522-2,ID=B16_450-3,ID=B16_449-3,ID=B16_449-4,ID=B16_522-1,ID=B16_49…	NA	NA
Fhl1	chrX	56731787	56793346	+	32	15.4589	2.3e-28	2.38e-26	32 [30,2]	0 [0,0]	0.831176	ID=B16_463-1,ID=B16_455-2,ID=B16_455-1,ID=B16_488-3,ID=B16_464-2,ID=B16_456-4,ID=B16_498-2,ID=B16_498-1,ID=B16_519-3,ID=B16_452-1,ID=B16_474-4,ID=B16_474-5,ID=B16_525-2,ID=B16_485-4,ID=B16_454-3,ID=B16_517-1,ID=B16_449-3,ID=B16_449-4,ID=B16_522-1,ID=B16_453-2,ID=B16_518-1,ID=B16_475-2,ID=B16_474-1,ID=B16_484-1,ID=B16_524-2,ID=B16_451-4,ID=B16_515-2,ID=B16_515-1,ID=B16_516-2,ID=B16_520-2,ID=B16_49…	NA	NA
2310002L09Rik	chr4	73939371	73950846	-	16	7.72947	3.33e-28	3.41e-26	16 [6,10]	0 [0,0]	1	ID=B16_485-1,ID=EL4_68-1,ID=B16_498-2,ID=B16_502-3,ID=B16_460-1,ID=B16_485-2,ID=B16_474-3,ID=B16_474-4,ID=B16_497-1,ID=B16_497-2,ID=B16_485-4,ID=B16_489-1,ID=B16_499-1,ID=B16_462-4,ID=B16_474-1,ID=B16_491-3	NA	NA
Ppil2	chr16	17086555	17111257	-	17	8.21256	6.97e-28	7.06e-26	17 [17,0]	0 [0,0]	0.918386	ID=B16_464-2,ID=B16_456-4,ID=B16_487-4,ID=B16_498-1,ID=B16_460-1,ID=EL4_33_2,ID=B16_525-2,ID=B16_525-1,ID=B16_521-1,ID=B16_449-4,ID=B16_522-1,ID=B16_453-2,ID=B16_518-2,ID=B16_499-2,ID=B16_515-1,ID=B16_516-2,ID=B16_520-1	NA	NA
Cdk6	chr5	3343893	3531008	+	57	27.5362	1.36e-27	1.36e-25	12 [7,5]	45 [-1,46]	0.755219	ID=B16_468-4,ID=B16_463-1,ID=B16PD1_534_3,ID=B16_455-2,ID=B16_488-3,ID=B16_101NT-3,ID=B16_464-2,ID=B16_464-1,ID=B16_456-4,ID=B16_487-4,ID=B16_485-3,ID=B16_487-2,ID=B16_450-1,ID=B16_498-2,ID=B16_498-1,ID=B16_519-3,ID=B16_452-1,ID=B16_460-1,ID=B16_485-2,ID=B16_474-3,ID=B16_474-4,ID=B16_474-5,ID=B16_497-2,ID=B16_486-3,ID=EL4PD1_150-2,ID=B16_525-1,ID=B16_521-2,ID=B16_521-1,ID=B16_454-3,ID=B16_517-1,I…	NA	NA
Pcdh15	chr10	73099342	74317264	+	46	22.2222	3.62e-27	3.55e-25	46 [23,23]	0 [0,0]	0.963455	ID=B16_463-1,ID=B16PD1_534_3,ID=B16PD1_534_1,ID=B16_488-3,ID=EL4_26_4,ID=B16_464-2,ID=B16_485-1,ID=B16_487-4,ID=B16_498-1,ID=EL4_18_2,ID=B16_452-1,ID=B16_460-1,ID=B16PD1_533_2,ID=B16PD1_533_3,ID=B16_485-2,ID=B16_474-3,ID=B16_474-4,ID=B16_474-5,ID=EL4_27_3,ID=EL4_34_5,ID=B16_485-4,ID=EL4_64-5,ID=B16_521-1,ID=EL4_36_3,ID=B16_2-2,ID=EL4PD1_157-2,ID=B16_489-1,ID=B16_522-2,ID=B16_450-3,ID=B16_449-4,ID…	NA	NA
Epb41l5	chr1	119545037	119648936	-	43	20.7729	9.79e-27	9.49e-25	42 [1,41]	1 [0,1]	0.901071	ID=EL4_41-1,ID=B16_455-1,ID=B16_101NT-3,ID=B16_464-2,ID=B16_464-1,ID=B16_456-4,ID=B16_487-4,ID=B16_498-1,ID=B16_519-3,ID=B16_519-1,ID=B16_452-1,ID=B16_474-3,ID=B16_486-3,ID=B16_525-2,ID=B16_525-1,ID=B16_485-4,ID=B16_521-1,ID=B16_454-3,ID=B16_517-1,ID=B16_489-1,ID=B16_522-2,ID=B16_449-3,ID=B16_522-1,ID=EL4_70-3,ID=B16_499-1,ID=B16_453-2,ID=B16_451-3,ID=B16_518-1,ID=B16_462-4,ID=EL4_65-1,ID=EL4_62-…	NA	NA
Nrg3	chr14	38368952	39473088	-	39	18.8406	1.03e-26	9.89e-25	39 [28,11]	0 [0,0]	0.968688	ID=B16_463-1,ID=B16PD1_534_3,ID=B16_488-3,ID=B16_464-2,ID=B16_464-1,ID=B16_485-1,ID=B16_487-4,ID=B16_450-1,ID=B16_498-2,ID=B16_498-1,ID=EL4_18_2,ID=B16_519-3,ID=B16_502-3,ID=B16_502-1,ID=EL4_22_3,ID=EL4PD1_104-1,ID=B16_474-3,ID=B16_474-4,ID=B16_474-5,ID=EL4_34_5,ID=B16_486-3,ID=EL4PD1_115-2,ID=EL4PD1_150-2,ID=B16PD1_531_2,ID=B16PD1_531_1,ID=EL4_64-5,ID=EL4_36_3,ID=B16_517-1,ID=B16_489-1,ID=B16_52…	NA	NA
Pole	chr5	110286306	110337474	+	26	12.5604	1.08e-26	1.02e-24	26 [8,18]	0 [0,0]	1	ID=B16PD1_534_1,ID=EL4_28_3,ID=B16_487-2,ID=EL4_68-1,ID=B16_498-2,ID=B16_498-1,ID=LLC_172-2,ID=EL4_18_2,ID=B16_4-2,ID=B16PD1_537_4,ID=B16PD1_537_2,ID=B16_497-2,ID=EL4_34_5,ID=EL4_59-1,ID=EL4_32_2,ID=B16PD1_531_2,ID=EL4PD1_119-4,ID=EL4_64-5,ID=EL4PD1_156-4,ID=B16_489-1,ID=B16_518-1,ID=B16_462-4,ID=B16_524-1,ID=EL4_29_2,ID=EL4_61-2,ID=LLC_167-1	NA	NA
Zfp981	chr4	146502027	146539392	+	24	11.5942	2.61e-26	2.45e-24	24 [11,13]	0 [0,0]	0.98099	ID=B16_463-1,ID=B16_488-3,ID=B16_464-2,ID=B16_464-1,ID=B16_485-1,ID=B16_450-1,ID=B16_502-3,ID=B16_460-1,ID=B16_485-2,ID=B16_474-3,ID=B16_474-4,ID=B16_474-5,ID=B16_497-1,ID=EL4_59-1,ID=EL4PD1_150-2,ID=B16_485-4,ID=B16_489-1,ID=B16_450-3,ID=B16_451-5,ID=B16_451-3,ID=B16_462-4,ID=B16_474-1,ID=B16_484-2,ID=B16_491-3	NA	NA
Ctnna2	chr6	76881637	77979699	-	29	14.0097	1.21e-25	1.11e-23	29 [15,14]	0 [0,0]	0.986854	ID=EL4PD1_116-2,ID=B16_463-1,ID=B16_488-3,ID=B16_464-2,ID=B16_464-1,ID=EL4PD1_156-2,ID=B16_487-4,ID=B16_498-1,ID=B16_460-1,ID=EL4_45-1,ID=EL4_22_3,ID=B16_474-3,ID=B16_486-3,ID=B16_489-1,ID=B16_449-4,ID=B16_522-1,ID=B16_499-1,ID=B16_451-5,ID=B16_453-2,ID=B16_475-2,ID=B16_462-4,ID=EL4_47-2,ID=EL4_62-1,ID=B16_474-1,ID=B16_484-1,ID=B16_499-2,ID=B16_491-3,ID=EL4PD1_152-1,ID=B16_516-2	NA	NA
Cadm2	chr16	66655421	67620908	-	35	16.9082	2.49e-25	2.27e-23	35 [16,19]	0 [0,0]	0.999975	ID=B16_463-1,ID=EL4_28_4,ID=B16_488-3,ID=B16_464-2,ID=B16_464-1,ID=B16_487-4,ID=B16_485-3,ID=B16_487-2,ID=B16_450-1,ID=B16_498-2,ID=B16_498-1,ID=B16_502-3,ID=B16_502-1,ID=B16_460-1,ID=EL4_22_3,ID=B16_16-2,ID=B16_474-3,ID=B16_474-4,ID=B16_497-1,ID=B16_486-3,ID=EL4_55-2,ID=B16_485-4,ID=EL4_36_4,ID=B16_454-3,ID=B16_489-1,ID=B16_449-4,ID=B16_499-1,ID=B16_451-5,ID=B16_475-2,ID=B16_462-4,ID=B16_469-1,I…	NA	NA
Olfr847	chr9	19373668	19378669	-	12	5.7971	6.11e-25	5.5e-23	3 [1,2]	9 [9,0]	1	ID=B16_3-4,ID=B16_455-1,ID=B16_4-2,ID=B16PD1_537_4,ID=B16_16-1,ID=B16_525-2,ID=B16_13-3,ID=B16_13-1,ID=B16_451-3,ID=B16PD1_163-1,ID=B16_474-1,ID=B16_515-1	NA	NA
CT010451.1	chr9	86173925	86176015	-	9	4.34783	1.28e-24	1.13e-22	2 [2,0]	7 [4,3]	1	ID=B16_464-2,ID=B16_485-3,ID=EL4_49-1,ID=B16_474-3,ID=B16_474-4,ID=B16_485-4,ID=B16_462-4,ID=B16_474-1,ID=B16_484-1	NA	NA
Cntn4	chr6	105677745	106699305	+	33	15.942	3.12e-24	2.73e-22	33 [15,18]	0 [0,0]	1	ID=B16_463-1,ID=B16PD1_534_3,ID=EL4_26_4,ID=B16_464-1,ID=B16_485-1,ID=B16_487-4,ID=B16_485-3,ID=B16_450-1,ID=B16_498-1,ID=B16_502-3,ID=B16_452-1,ID=EL4_22_3,ID=B16_485-2,ID=B16_474-3,ID=B16_474-4,ID=EL4PD1_114-1,ID=EL4_59-1,ID=EL4_32_2,ID=EL4_36_3,ID=B16_489-1,ID=B16_499-1,ID=B16_451-5,ID=B16_475-1,ID=B16_462-4,ID=EL4_65-1,ID=B16_14-1,ID=EL4_62-1,ID=B16_484-1,ID=B16_499-2,ID=EL4_29_2,ID=B16_515-2…	NA	NA
Zfp984	chr4	147753974	147809788	-	29	14.0097	7.81e-24	6.69e-22	26 [13,13]	3 [3,0]	1	ID=B16_455-1,ID=B16_464-2,ID=EL4_60-1,ID=B16_485-1,ID=B16_487-2,ID=B16_519-3,ID=B16_460-1,ID=EL4_22_3,ID=B16_12-3,ID=B16_485-2,ID=B16_474-3,ID=B16_474-4,ID=B16_474-5,ID=B16_497-1,ID=EL4_33_2,ID=EL4_67-2,ID=EL4_64-1,ID=B16_489-1,ID=B16_450-3,ID=B16_518-1,ID=B16_475-2,ID=B16_462-4,ID=LLC_174-3,ID=EL4_47-2,ID=EL4_62-1,ID=B16_474-1,ID=B16_499-2,ID=B16_515-2,ID=B16_491-2	NA	NA
Frmpd4	chrX	167471309	168577231	-	34	16.4251	9.59e-24	8.14e-22	34 [19,15]	0 [0,0]	0.966094	ID=B16_463-1,ID=EL4_28_1,ID=EL4_60-2,ID=B16_488-3,ID=B16_464-1,ID=B16_485-1,ID=B16_487-4,ID=B16_498-2,ID=B16_498-1,ID=LLC_168-1,ID=EL4_18_2,ID=B16_502-3,ID=B16PD1_537_4,ID=B16_485-2,ID=B16_474-3,ID=B16_474-4,ID=EL4PD1_113-1,ID=EL4PD1_150-3,ID=B16PD1_531_1,ID=EL4_36_2,ID=B16_2-2,ID=EL4_38_3,ID=B16_489-1,ID=B16_450-3,ID=B16_499-1,ID=B16_451-5,ID=B16_451-3,ID=B16_475-2,ID=LLC_174-1,ID=EL4_62-1,ID=B1…	NA	NA
Mss51	chr14	20482864	20496901	-	15	7.24638	1.24e-23	1.04e-21	1 [0,1]	14 [14,0]	1	ID=EL4_28_4,ID=EL4_28_3,ID=EL4_68-1,ID=B16_502-1,ID=B16_452-1,ID=B16_460-1,ID=B16PD1_533_2,ID=B16PD1_533_3,ID=EL4_64-2,ID=EL4_25_3,ID=B16PD1_532_1,ID=EL4_38_3,ID=B16_453-2,ID=LLC_169-2,ID=B16_17-1	NA	NA
Cyp2j13	chr4	96042660	96077540	-	22	10.628	1.49e-23	1.24e-21	21 [12,9]	1 [1,0]	0.961679	ID=EL4_28_1,ID=EL4_28_3,ID=B16_488-3,ID=EL4PD1_116-3,ID=B16_487-4,ID=B16_498-1,ID=B16_460-1,ID=B16_485-2,ID=B16PD1_161-4,ID=B16_474-4,ID=B16_497-1,ID=EL4_27_3,ID=EL4_32_3,ID=EL4_32_2,ID=EL4PD1_157-1,ID=B16_489-1,ID=B16_462-4,ID=B16_484-1,ID=EL4_29_2,ID=EL4_61-2,ID=B16_491-3,ID=B16_474-2	NA	NA
Tcstv3	chr13	120317567	120318076	+	6	2.89855	1.92e-23	1.59e-21	0 [0,0]	6 [0,6]	1	ID=B16_488-3,ID=B16_101NT-3,ID=B16_485-3,ID=B16_498-2,ID=B16_497-2,ID=B16_449-4	NA	NA
Anks1b	chr10	89873509	90970219	+	28	13.5266	2.02e-23	1.65e-21	28 [17,11]	0 [0,0]	1	ID=B16_463-1,ID=EL4_28_3,ID=B16_488-3,ID=EL4_26_4,ID=B16_464-2,ID=B16_464-1,ID=B16_485-1,ID=B16_487-2,ID=B16_498-1,ID=EL4PD1_149-4,ID=EL4_49-1,ID=B16_460-1,ID=B16_474-3,ID=B16_474-4,ID=B16_474-5,ID=B16_497-1,ID=EL4_32_3,ID=EL4_55-2,ID=EL4_64-5,ID=B16_2-2,ID=B16_450-3,ID=B16_449-3,ID=B16_499-1,ID=B16_451-3,ID=B16_462-4,ID=EL4_65-1,ID=B16_469-1,ID=B16_474-1	NA	NA
Nrg1	chr8	31817408	32884029	-	30	14.4928	3.57e-23	2.9e-21	29 [15,14]	1 [1,0]	0.999933	ID=B16_463-1,ID=B16_488-3,ID=B16_464-2,ID=B16_464-1,ID=EL4PD1_114-3,ID=B16_498-1,ID=B16_502-3,ID=B16_474-3,ID=B16_474-4,ID=B16_474-5,ID=B16_497-1,ID=EL4_48-4,ID=EL4PD1_114-1,ID=EL4_67-2,ID=EL4PD1_119-4,ID=B16_489-1,ID=B16_522-1,ID=B16_499-1,ID=B16_451-5,ID=EL4PD1_118-2,ID=B16_462-4,ID=B16PD1_160-2,ID=EL4_62-1,ID=B16_474-1,ID=LLC_170-1,ID=B16_484-4,ID=B16_484-2,ID=EL4_72-3,ID=B16_499-2,ID=B16_491-3	NA	NA
Rps18-ps1	chr4	71370738	71371196	-	7	3.38164	4.83e-23	3.87e-21	0 [0,0]	7 [3,4]	1	ID=B16_464-2,ID=B16_460-1,ID=B16_474-3,ID=B16_474-4,ID=B16_497-1,ID=B16_450-3,ID=B16_462-4	NA	NA
Faf2	chr13	54621784	54664063	+	21	10.1449	1.02e-21	8.07e-20	21 [20,1]	0 [0,0]	0.856427	ID=B16_455-1,ID=B16_488-3,ID=B16_101NT-3,ID=B16_464-1,ID=B16_502-3,ID=B16_474-4,ID=B16_525-2,ID=B16_525-1,ID=B16_521-1,ID=B16_517-1,ID=B16_522-2,ID=B16_449-3,ID=B16_522-1,ID=B16_453-2,ID=B16_518-1,ID=B16_462-4,ID=B16_515-2,ID=B16_516-2,ID=B16_520-2,ID=B16_520-1,ID=B16_474-2	NA	NA
Pcdh9	chr14	93013410	93890669	-	30	14.4928	1.81e-21	1.41e-19	30 [19,11]	0 [0,0]	0.989717	ID=B16_463-1,ID=EL4_28_4,ID=B16_488-3,ID=B16_464-2,ID=B16_464-1,ID=B16_485-1,ID=B16_450-1,ID=B16_498-2,ID=B16_502-3,ID=B16_460-1,ID=B16_474-3,ID=B16_474-4,ID=B16_474-5,ID=EL4PD1_150-3,ID=EL4PD1_150-2,ID=B16_485-4,ID=B16_454-3,ID=B16_489-1,ID=B16_450-3,ID=B16_13-3,ID=B16_499-1,ID=B16_451-5,ID=B16_451-3,ID=B16_474-1,ID=B16_484-1,ID=B16_484-2,ID=EL4PD1_117-1,ID=B16_499-2,ID=B16_491-3,ID=EL4PD1_152-1	NA	NA
Tenm2	chr11	36006656	37235882	-	40	19.3237	2.08e-21	1.61e-19	40 [15,25]	0 [0,0]	1	ID=B16_463-1,ID=B16_3-4,ID=EL4_60-2,ID=EL4PD1_116-1,ID=B16_464-2,ID=B16_464-1,ID=B16_487-4,ID=B16_485-3,ID=B16_487-2,ID=B16_450-1,ID=B16_498-2,ID=B16_498-1,ID=EL4_18_2,ID=B16_502-3,ID=B16_502-1,ID=EL4_49-1,ID=B16_460-1,ID=B16PD1_537_1,ID=B16_16-3,ID=B16_474-3,ID=B16_474-4,ID=B16_16-4,ID=EL4_32_3,ID=EL4_59-1,ID=B16_486-3,ID=B16_2-2,ID=B16_489-1,ID=B16_450-3,ID=B16_499-1,ID=B16_13-1,ID=B16_451-5,ID…	NA	NA
Chl1	chr6	103510586	103750211	+	68	32.8502	4.09e-21	3.14e-19	68 [46,22]	0 [0,0]	0.867831	ID=EL4PD1_116-2,ID=EL4_41-1,ID=B16_463-1,ID=EL4_28_3,ID=B16_488-3,ID=EL4PD1_116-1,ID=B16_101NT-3,ID=B16_464-2,ID=B16_464-1,ID=B16_487-4,ID=B16_485-3,ID=B16_487-2,ID=B16_450-1,ID=B16_498-2,ID=B16_498-1,ID=LLC_171-2,ID=LLC_172-2,ID=B16_502-3,ID=B16_502-1,ID=EL4_49-1,ID=B16_460-1,ID=EL4_45-1,ID=B16_485-2,ID=B16PD1_161-4,ID=B16_474-3,ID=B16_474-4,ID=B16_474-5,ID=B16_497-1,ID=EL4_27_3,ID=EL4_32_3,ID=E…	NA	NA
Atp6v1e1	chr6	120795244	120822793	-	16	7.72947	5.58e-21	4.25e-19	16 [5,11]	0 [0,0]	0.945034	ID=B16_3-4,ID=B16_455-2,ID=B16_455-1,ID=B16_487-4,ID=B16_4-2,ID=B16_12-3,ID=B16_16-3,ID=B16_16-1,ID=B16_16-4,ID=B16_525-2,ID=B16_2-2,ID=B16_1-2,ID=B16_13-1,ID=B16_453-2,ID=B16_5-2,ID=B16_17-1	NA	NA
Dpyd	chr3	118562129	119432924	+	23	11.1111	6.92e-21	5.23e-19	23 [13,10]	0 [0,0]	1	ID=B16_463-1,ID=B16_488-3,ID=B16_464-2,ID=B16_464-1,ID=EL4PD1_116-3,ID=B16_498-2,ID=B16_498-1,ID=B16_474-3,ID=B16_474-4,ID=EL4PD1_115-2,ID=EL4PD1_113-1,ID=EL4_67-4,ID=B16_521-2,ID=EL4_36_3,ID=EL4_36_2,ID=B16_499-1,ID=B16_451-5,ID=B16_462-4,ID=EL4_62-1,ID=B16_474-1,ID=B16_484-1,ID=B16_499-2,ID=B16_491-3	NA	NA
Grm7	chr6	110645582	111567230	+	26	12.5604	1.29e-20	9.64e-19	26 [11,15]	0 [0,0]	0.999923	ID=EL4PD1_116-2,ID=B16_463-1,ID=EL4_28_1,ID=EL4PD1_116-1,ID=B16_464-2,ID=B16_464-1,ID=B16_485-1,ID=B16_498-2,ID=B16_498-1,ID=B16_502-3,ID=B16_502-1,ID=B16_460-1,ID=EL4_22_3,ID=B16_474-3,ID=B16_474-4,ID=B16_497-1,ID=B16_485-4,ID=EL4_36_4,ID=B16_489-1,ID=B16_499-1,ID=B16_451-5,ID=B16_475-1,ID=B16_462-4,ID=B16_484-4,ID=B16_499-2,ID=B16_491-3	NA	NA
Ndst3	chr3	123526166	123690853	-	49	23.6715	2.81e-20	2.05e-18	49 [2,47]	0 [0,0]	0.719055	ID=B16_468-4,ID=B16_463-1,ID=B16_455-2,ID=B16_464-2,ID=B16_464-1,ID=B16_456-4,ID=B16_485-1,ID=B16_487-4,ID=B16_485-3,ID=B16_450-1,ID=B16_498-2,ID=B16_498-1,ID=B16_519-1,ID=B16_452-1,ID=B16_485-2,ID=B16_474-3,ID=B16_474-4,ID=B16_474-5,ID=B16_497-1,ID=B16_486-3,ID=B16_525-2,ID=B16_525-1,ID=B16_485-4,ID=B16_521-2,ID=B16_454-3,ID=B16_517-1,ID=B16_449-3,ID=B16_522-1,ID=B16_451-5,ID=B16_453-2,ID=B16_51…	NA	NA
Immp2l	chr12	41024090	41955588	+	27	13.0435	1.06e-19	7.6e-18	27 [14,13]	0 [0,0]	0.999865	ID=B16_463-1,ID=B16_455-2,ID=B16_464-2,ID=B16_464-1,ID=B16_487-4,ID=B16_485-3,ID=B16_450-1,ID=B16_498-1,ID=B16_502-3,ID=EL4_45-1,ID=B16_474-4,ID=EL4_32_3,ID=B16_486-3,ID=B16PD1_531_2,ID=B16PD1_531_1,ID=EL4_67-2,ID=EL4PD1_157-1,ID=EL4_38_3,ID=B16_489-1,ID=B16_499-1,ID=B16_451-3,ID=B16_462-4,ID=B16_484-1,ID=B16_484-2,ID=B16_491-3,ID=B16_516-2,ID=B16_474-2	NA	NA
Nynrin	chr14	55854115	55874735	+	12	5.7971	1.25e-19	8.81e-18	12 [0,12]	0 [0,0]	0.895461	ID=B16_463-1,ID=B16_519-1,ID=B16_521-2,ID=B16_449-3,ID=B16_453-2,ID=B16_518-2,ID=B16_518-1,ID=B16_475-2,ID=B16_462-3,ID=B16_524-1,ID=B16_520-2,ID=B16_520-1	NA	NA
Ptprt	chr2	161521990	162661147	-	31	14.9758	1.38e-19	9.69e-18	31 [15,16]	0 [0,0]	0.979601	ID=B16_463-1,ID=B16_488-3,ID=B16_464-2,ID=B16_464-1,ID=B16_487-4,ID=B16_485-3,ID=B16_498-1,ID=B16_502-3,ID=B16_460-1,ID=B16_485-2,ID=B16_474-4,ID=B16_474-5,ID=B16_497-1,ID=EL4_48-4,ID=EL4_34_5,ID=EL4PD1_150-2,ID=B16PD1_531_2,ID=EL4_64-1,ID=B16_450-3,ID=B16_499-1,ID=B16_451-5,ID=B16_453-2,ID=B16_462-4,ID=EL4_65-1,ID=EL4_44-2,ID=B16_524-1,ID=B16_451-4,ID=B16_499-2,ID=B16_515-1,ID=B16_491-3,ID=EL4PD…	NA	NA
Epha6	chr16	59653483	60605248	-	37	17.8744	5.04e-19	3.51e-17	37 [25,12]	0 [0,0]	0.965974	ID=B16_463-1,ID=EL4_28_1,ID=B16_488-3,ID=B16_101NT-3,ID=B16_464-2,ID=B16_464-1,ID=B16_456-4,ID=B16_485-1,ID=B16_498-1,ID=EL4_18_2,ID=B16_502-3,ID=EL4_49-1,ID=B16_460-1,ID=EL4_37_2,ID=B16_485-2,ID=B16_474-3,ID=B16_474-4,ID=B16_497-1,ID=EL4_32_3,ID=EL4_34_5,ID=EL4_59-1,ID=EL4PD1_115-2,ID=EL4_32_2,ID=B16PD1_531_1,ID=EL4_67-2,ID=EL4_36_3,ID=EL4_38_3,ID=B16_449-4,ID=B16_499-1,ID=B16_475-1,ID=B16_462-4…	NA	NA
Hnrnpf	chr6	117900340	117925621	+	16	7.72947	1.31e-18	8.99e-17	16 [13,3]	0 [0,0]	1	ID=EL4_28_4,ID=EL4_28_3,ID=B16_498-1,ID=EL4_32_1,ID=B16PD1_533_2,ID=EL4_19_2,ID=EL4_32_3,ID=EL4PD1_114-1,ID=EL4_34_5,ID=B16PD1_532_1,ID=B16PD1_532_2,ID=EL4_43-2,ID=EL4_38_3,ID=EL4_29_2,ID=B16_491-3,ID=B16_491-2	NA	NA
Grm8	chr6	27275119	28134545	-	23	11.1111	1.76e-18	1.2e-16	23 [12,11]	0 [0,0]	0.974652	ID=B16_463-1,ID=B16_488-3,ID=B16_464-2,ID=B16_464-1,ID=EL4PD1_114-3,ID=B16_498-2,ID=B16_498-1,ID=B16_502-3,ID=B16_474-3,ID=B16_474-4,ID=EL4_27_3,ID=EL4PD1_115-3,ID=EL4_55-2,ID=EL4_67-1,ID=EL4_64-1,ID=B16_489-1,ID=B16_499-1,ID=B16_475-1,ID=B16_462-4,ID=EL4_62-1,ID=B16_484-1,ID=B16_499-2,ID=B16_491-3	NA	NA
Agbl1	chr7	76229887	77124698	+	24	11.5942	2.98e-18	2e-16	24 [9,15]	0 [0,0]	1	ID=B16_463-1,ID=B16PD1_534_3,ID=B16PD1_534_1,ID=B16_464-2,ID=B16_464-1,ID=B16_456-4,ID=B16_485-3,ID=B16_498-1,ID=EL4_49-1,ID=B16_460-1,ID=B16_485-2,ID=B16_474-4,ID=EL4_32_2,ID=B16_485-4,ID=EL4_67-2,ID=EL4_64-1,ID=B16_489-1,ID=B16_499-1,ID=B16_475-2,ID=B16_462-4,ID=B16PD1_160-3,ID=EL4_62-1,ID=B16_499-2,ID=B16_491-3	NA	NA
Ncbp2	chr16	31948606	31961781	+	11	5.31401	3.25e-18	2.16e-16	0 [0,0]	11 [11,0]	1	ID=EL4_60-1,ID=LLC_172-2,ID=EL4_37_2,ID=EL4_19_2,ID=EL4_34_5,ID=B16PD1_531_2,ID=EL4_67-3,ID=B16PD1_532_1,ID=EL4PD1_104-3,ID=EL4PD1_117-1,ID=EL4PD1_152-3	NA	NA
1700024P16Rik	chr4	104913456	105016863	+	34	16.4251	4.58e-18	3.02e-16	34 [15,19]	0 [0,0]	0.961871	ID=B16_3-4,ID=B16_455-2,ID=EL4_28_3,ID=B16_488-3,ID=B16_464-2,ID=B16_487-4,ID=B16_487-2,ID=B16_498-2,ID=B16_502-3,ID=B16_460-1,ID=B16_12-3,ID=B16_474-3,ID=B16_474-4,ID=B16_16-4,ID=B16_497-1,ID=EL4PD1_150-2,ID=B16_485-4,ID=B16_1-2,ID=B16_489-1,ID=B16_499-1,ID=B16_13-1,ID=B16_453-2,ID=B16_451-3,ID=B16_462-4,ID=LLC_174-3,ID=B16_17-3,ID=B16_17-1,ID=EL4_47-1,ID=B16_474-1,ID=B16_484-1,ID=B16_524-2,ID=B…	NA	NA
Pwwp2b	chr7	139248482	139267975	+	11	5.31401	4.64e-18	3.04e-16	0 [0,0]	11 [0,11]	0.958333	ID=B16_455-1,ID=B16_525-1,ID=B16_517-1,ID=B16_449-3,ID=B16_449-4,ID=B16_518-2,ID=B16_518-1,ID=B16_524-2,ID=B16_515-1,ID=B16_516-2,ID=B16_520-1	NA	NA
Nsun3	chr16	62732444	62786777	-	25	12.0773	1.85e-17	1.2e-15	25 [22,3]	0 [0,0]	0.877332	ID=B16_463-1,ID=B16_455-2,ID=B16_456-4,ID=B16_487-2,ID=B16_519-3,ID=B16_452-1,ID=B16_460-1,ID=B16_474-3,ID=B16_474-4,ID=B16_525-1,ID=B16_485-4,ID=B16_522-2,ID=B16_449-3,ID=B16_449-4,ID=B16_522-1,ID=B16_518-2,ID=B16_518-1,ID=B16_462-3,ID=B16_469-1,ID=B16_515-2,ID=B16_515-1,ID=B16_516-2,ID=B16_520-2,ID=B16_520-1,ID=B16_474-2	NA	NA
Nlgn1	chr3	25426215	26332460	-	33	15.942	2.99e-17	1.9e-15	33 [16,17]	0 [0,0]	0.981149	ID=B16_468-4,ID=B16_463-1,ID=B16_488-3,ID=B16_101NT-3,ID=B16_464-1,ID=EL4PD1_156-2,ID=B16_485-1,ID=B16_487-4,ID=B16_485-3,ID=EL4PD1_114-3,ID=B16_502-3,ID=B16_460-1,ID=EL4_46-2,ID=B16_474-4,ID=B16_474-5,ID=B16_497-2,ID=B16_486-3,ID=EL4PD1_113-1,ID=B16_485-4,ID=EL4_64-1,ID=EL4_36_3,ID=B16_489-1,ID=B16_450-3,ID=B16_13-1,ID=B16_451-5,ID=B16_451-3,ID=B16_461-1,ID=B16_462-4,ID=EL4_47-2,ID=EL4PD1_152-2,…	NA	NA
Gpc6	chr14	116925297	117979529	+	35	16.9082	3.03e-17	1.92e-15	35 [19,16]	0 [0,0]	1	ID=B16_463-1,ID=B16PD1_534_1,ID=EL4_63-1,ID=B16_464-2,ID=B16_464-1,ID=B16_485-1,ID=B16_487-4,ID=B16_485-3,ID=B16_487-2,ID=B16_498-2,ID=B16_498-1,ID=B16_4-2,ID=B16_502-3,ID=B16_452-1,ID=B16_460-1,ID=B16PD1_537_1,ID=B16_485-2,ID=B16_474-3,ID=B16_474-4,ID=B16_486-3,ID=EL4_36_4,ID=B16_489-1,ID=B16_450-3,ID=B16_449-3,ID=B16_449-4,ID=B16_522-1,ID=B16_499-1,ID=EL4PD1_118-2,ID=B16_462-4,ID=B16_469-1,ID=L…	NA	NA
Zfp985	chr4	147553339	147585198	+	19	9.17874	3.23e-17	2.03e-15	17 [10,7]	2 [0,2]	1	ID=B16PD1_534_3,ID=EL4_28_4,ID=EL4_26_4,ID=B16_464-2,ID=EL4PD1_116-3,ID=EL4_18_2,ID=B16_474-3,ID=B16_474-4,ID=EL4_27_3,ID=EL4_59-1,ID=EL4_33_2,ID=EL4PD1_157-1,ID=B16_489-1,ID=B16_449-4,ID=B16_462-4,ID=B16_474-1,ID=B16_499-2,ID=EL4_29_2,ID=B16_491-3	NA	NA
Tyrp1	chr4	80834230	80851718	+	14	6.76329	4.93e-17	3.07e-15	11 [6,5]	3 [2,1]	1	ID=B16_463-1,ID=B16_488-3,ID=B16_464-2,ID=B16_485-1,ID=B16_498-2,ID=B16_460-1,ID=B16_474-3,ID=B16_474-4,ID=B16_474-5,ID=B16_497-1,ID=B16_450-3,ID=B16_475-2,ID=EL4PD1_119-1,ID=B16_499-2	NA	NA
Zfp618	chr4	62965573	63139708	+	40	19.3237	5.3e-17	3.28e-15	40 [30,10]	0 [0,0]	1	ID=EL4_28_4,ID=EL4_28_1,ID=EL4_28_2,ID=B16_488-3,ID=EL4_26_4,ID=B16_464-2,ID=B16_464-1,ID=EL4_60-1,ID=EL4PD1_116-3,ID=B16_487-4,ID=B16_450-1,ID=B16_498-2,ID=B16_4-2,ID=B16_502-3,ID=EL4_49-1,ID=B16_460-1,ID=B16PD1_533_1,ID=B16PD1_537_2,ID=B16_16-1,ID=B16_474-3,ID=B16_474-4,ID=B16_474-5,ID=B16_497-1,ID=EL4_19_2,ID=EL4_27_3,ID=B16_486-3,ID=EL4_32_2,ID=B16_485-4,ID=EL4_67-1,ID=EL4_67-3,ID=EL4_36_4,ID…	NA	NA
Diaph2	chrX	129749742	130465831	+	24	11.5942	9.72e-17	5.97e-15	24 [17,7]	0 [0,0]	1	ID=EL4_41-1,ID=B16_463-1,ID=B16_455-1,ID=B16_488-3,ID=B16_464-2,ID=B16_464-1,ID=B16_485-1,ID=B16_460-1,ID=EL4_37_2,ID=B16PD1_537_2,ID=B16_16-1,ID=B16_474-3,ID=B16_474-4,ID=EL4_32_3,ID=EL4PD1_115-3,ID=EL4PD1_150-2,ID=EL4_64-1,ID=EL4_36_3,ID=EL4PD1_157-1,ID=B16_489-1,ID=B16_522-2,ID=B16_450-3,ID=LLC_170-1,ID=B16_491-2	NA	NA
Fhl5	chr4	25199908	25242876	-	22	10.628	1.43e-16	8.69e-15	21 [11,10]	1 [0,1]	1	ID=EL4_26_4,ID=B16_464-2,ID=B16_485-3,ID=B16_487-2,ID=B16_450-1,ID=B16_502-3,ID=B16_460-1,ID=B16_485-2,ID=B16_474-3,ID=B16_474-4,ID=B16_474-5,ID=B16_525-1,ID=B16_485-4,ID=EL4_36_3,ID=B16_450-3,ID=B16_499-1,ID=B16_475-1,ID=EL4_62-1,ID=B16_484-1,ID=B16_499-2,ID=B16_491-3,ID=B16_491-2	NA	NA
Zfp352	chr4	90218820	90225702	+	9	4.34783	2.11e-16	1.26e-14	7 [4,3]	2 [1,1]	1	ID=EL4PD1_116-2,ID=B16_488-3,ID=B16_502-3,ID=B16_460-1,ID=B16_474-3,ID=B16_497-1,ID=EL4PD1_115-3,ID=EL4_62-1,ID=B16_474-1	NA	NA
Sox5	chr6	143843739	144781977	-	20	9.66184	2.68e-16	1.59e-14	20 [14,6]	0 [0,0]	1	ID=B16_463-1,ID=EL4_28_4,ID=B16_488-3,ID=B16_464-1,ID=B16_487-2,ID=B16_460-1,ID=B16_474-3,ID=B16_474-4,ID=B16_497-1,ID=EL4PD1_150-2,ID=B16_485-4,ID=B16_489-1,ID=B16_499-1,ID=B16_451-5,ID=EL4PD1_118-2,ID=B16_462-4,ID=EL4_62-1,ID=B16_484-1,ID=B16_524-2,ID=B16_491-3	NA	NA
43160	chr8	65618086	66471637	+	29	14.0097	3.29e-16	1.94e-14	29 [16,13]	0 [0,0]		ID=B16_463-1,ID=B16PD1_534_2,ID=B16_488-3,ID=B16_464-2,ID=B16_464-1,ID=B16_487-4,ID=B16_487-2,ID=B16_498-2,ID=B16_498-1,ID=B16_502-3,ID=B16_460-1,ID=EL4_22_3,ID=B16_485-2,ID=B16_474-3,ID=B16_474-4,ID=EL4_39-4,ID=EL4_64-1,ID=EL4_36_3,ID=EL4_36_2,ID=B16_499-1,ID=B16_451-5,ID=B16_462-3,ID=B16_462-4,ID=EL4_65-1,ID=EL4_47-1,ID=B16_474-1,ID=B16_484-1,ID=B16_499-2,ID=B16_491-2	NA	NA
Adgrl3	chr5	81020571	81796634	+	25	12.0773	7.17e-16	4.2e-14	25 [15,10]	0 [0,0]	0.982481	ID=B16_463-1,ID=B16_488-3,ID=B16_464-2,ID=B16_464-1,ID=B16_456-4,ID=EL4PD1_116-3,ID=B16_485-1,ID=B16_487-4,ID=B16_450-1,ID=B16_498-1,ID=B16_502-3,ID=B16_474-3,ID=B16_474-4,ID=EL4PD1_115-3,ID=B16_450-3,ID=B16_13-1,ID=B16_451-5,ID=B16_462-4,ID=B16_484-1,ID=EL4PD1_117-3,ID=EL4_72-3,ID=EL4PD1_118-1,ID=B16_499-2,ID=B16_491-3,ID=B16_491-2	NA	NA
Park2	chr17	10840384	12063361	+	46	22.2222	1.42e-15	8.2e-14	46 [25,21]	0 [0,0]	0.973704	ID=B16_463-1,ID=B16_488-3,ID=EL4_26_4,ID=B16_464-2,ID=B16_464-1,ID=B16_485-1,ID=B16_487-2,ID=B16_450-1,ID=B16_498-2,ID=B16_498-1,ID=LLC_168-1,ID=EL4_18_2,ID=B16_502-3,ID=B16_452-1,ID=B16_460-1,ID=EL4_32_1,ID=EL4_45-1,ID=B16PD1_537_4,ID=B16PD1_161-4,ID=B16_474-3,ID=B16_474-4,ID=EL4_34_5,ID=EL4_59-1,ID=EL4PD1_115-3,ID=EL4_55-2,ID=EL4PD1_113-1,ID=EL4_33_2,ID=B16_485-4,ID=B16PD1_531_1,ID=EL4_67-2,ID=…	NA	NA
Ppp3cb	chr14	20499364	20546573	-	25	12.0773	1.93e-15	1.11e-13	25 [25,0]	0 [0,0]	1	ID=B16PD1_534_2,ID=EL4_28_4,ID=B16_455-1,ID=EL4_28_3,ID=B16_464-1,ID=EL4_68-1,ID=B16_4-2,ID=B16_502-1,ID=B16_452-1,ID=B16PD1_533_2,ID=B16PD1_533_3,ID=B16PD1_537_2,ID=EL4_27_3,ID=EL4_64-2,ID=EL4_25_3,ID=B16PD1_532_1,ID=EL4_38_3,ID=B16_499-1,ID=B16_453-2,ID=LLC_169-2,ID=B16PD1_160-3,ID=B16_17-1,ID=EL4_54-2,ID=B16_520-2,ID=B16_520-1	NA	NA
Mgat4c	chr10	101681487	102391466	+	24	11.5942	2.19e-15	1.25e-13	24 [11,13]	0 [0,0]	1	ID=EL4_41-1,ID=B16_463-1,ID=B16PD1_534_3,ID=B16_488-3,ID=B16_464-2,ID=B16_464-1,ID=EL4PD1_116-3,ID=B16_450-1,ID=EL4_18_2,ID=B16_502-1,ID=B16_474-3,ID=B16_474-4,ID=B16_497-1,ID=EL4_38_3,ID=B16_489-1,ID=B16_450-3,ID=B16_449-4,ID=B16_499-1,ID=B16_451-3,ID=EL4_65-1,ID=B16_484-2,ID=B16_499-2,ID=B16_491-3,ID=B16_491-2	NA	NA
C130026I21Rik	chr1	84992690	85246397	-	52	25.1208	2.51e-15	1.43e-13	50 [21,29]	2 [2,0]	0.984875	ID=B16_468-4,ID=EL4PD1_116-2,ID=EL4_41-1,ID=B16_463-1,ID=EL4_28_4,ID=EL4_28_1,ID=EL4_60-2,ID=B16_488-3,ID=EL4PD1_116-1,ID=B16_464-1,ID=B16_485-3,ID=B16_487-2,ID=B16_498-1,ID=LLC_171-2,ID=LLC_172-2,ID=EL4PD1_149-4,ID=B16_502-3,ID=EL4_45-1,ID=EL4_46-2,ID=EL4PD1_104-1,ID=EL4_37_2,ID=B16PD1_537_2,ID=B16PD1_161-4,ID=EL4_27_3,ID=EL4_59-1,ID=EL4_55-2,ID=EL4PD1_113-1,ID=EL4_32_2,ID=EL4PD1_150-3,ID=EL4PD1…	NA	NA
4931408C20Rik	chr1	26681814	26687460	-	8	3.86473	3.11e-15	1.74e-13	6 [2,4]	2 [0,2]	1	ID=EL4_41-1,ID=B16_463-1,ID=B16_464-1,ID=EL4_55-2,ID=EL4_67-1,ID=EL4_67-2,ID=EL4_64-2,ID=B16_499-1	NA	NA
Pcdh11x	chrX	120290327	120910619	+	19	9.17874	3.17e-15	1.76e-13	19 [13,6]	0 [0,0]	1	ID=EL4_28_1,ID=EL4_28_3,ID=B16_464-2,ID=B16_464-1,ID=B16_450-1,ID=EL4_18_2,ID=B16_502-3,ID=EL4PD1_114-1,ID=EL4PD1_150-2,ID=EL4_36_2,ID=B16_489-1,ID=B16_451-3,ID=B16_475-1,ID=B16_462-4,ID=B16PD1_163-1,ID=EL4_47-1,ID=B16_499-2,ID=EL4_29_2,ID=B16_491-3	NA	NA
Rwdd2a	chr9	86572016	86574899	+	6	2.89855	3.86e-15	2.14e-13	2 [2,0]	4 [0,4]	1	ID=B16_474-3,ID=B16_474-4,ID=B16_474-5,ID=B16_497-2,ID=B16_474-1,ID=B16_474-2	NA	NA
Celf2	chr2	6539694	7396000	-	24	11.5942	4.13e-15	2.27e-13	24 [10,14]	0 [0,0]	1	ID=B16_463-1,ID=EL4_28_4,ID=B16_488-3,ID=B16_464-2,ID=B16_464-1,ID=B16_485-1,ID=B16_487-4,ID=EL4PD1_114-3,ID=B16_498-1,ID=B16_460-1,ID=B16_474-4,ID=B16_486-3,ID=EL4PD1_157-3,ID=EL4_64-5,ID=EL4_36_3,ID=B16_522-1,ID=B16_13-3,ID=B16_499-1,ID=B16_451-3,ID=B16_475-1,ID=B16_462-4,ID=B16_484-1,ID=B16_499-2,ID=B16_491-3	NA	NA
Grik2	chr10	49094833	49788766	-	24	11.5942	5.07e-15	2.76e-13	24 [12,12]	0 [0,0]	1	ID=B16_463-1,ID=B16_488-3,ID=B16_464-2,ID=B16_464-1,ID=B16_456-4,ID=B16_498-1,ID=B16_502-3,ID=B16_460-1,ID=EL4PD1_104-1,ID=B16_474-3,ID=B16_474-4,ID=B16_497-1,ID=EL4_55-2,ID=B16_485-4,ID=B16PD1_531_2,ID=EL4_67-2,ID=B16_489-1,ID=B16_450-3,ID=B16_461-1,ID=B16_462-4,ID=B16_14-1,ID=B16_474-1,ID=B16_484-2,ID=B16_491-3	NA	NA
Cdh18	chr15	22549022	23400567	+	37	17.8744	9.85e-15	5.32e-13	37 [19,18]	0 [0,0]	1	ID=B16_468-4,ID=EL4_26_4,ID=B16_464-2,ID=B16_464-1,ID=B16_487-4,ID=B16_498-2,ID=B16_498-1,ID=B16_502-3,ID=EL4_49-1,ID=B16_460-1,ID=EL4_22_3,ID=B16PD1_537_1,ID=B16_474-3,ID=B16_474-4,ID=B16_474-5,ID=EL4_19_2,ID=EL4_48-4,ID=B16_486-3,ID=EL4PD1_115-2,ID=EL4PD1_113-1,ID=EL4_52-5,ID=EL4_67-2,ID=EL4_38_3,ID=B16_489-1,ID=B16_450-3,ID=B16_449-4,ID=EL4_70-3,ID=B16_13-3,ID=B16_499-1,ID=B16_462-4,ID=EL4_65-…	NA	NA
Tenm1	chrX	42532391	43274786	-	26	12.5604	1.04e-14	5.56e-13	26 [16,10]	0 [0,0]	1	ID=B16_468-4,ID=B16_463-1,ID=B16_488-3,ID=B16_464-2,ID=B16_485-1,ID=B16_485-3,ID=B16_487-2,ID=B16_450-1,ID=B16_498-1,ID=B16_460-1,ID=B16_474-3,ID=B16_474-4,ID=B16_497-1,ID=EL4PD1_115-3,ID=EL4_25_3,ID=EL4_36_3,ID=B16_489-1,ID=B16_450-3,ID=B16_499-1,ID=B16_451-5,ID=B16_462-4,ID=EL4_65-1,ID=B16_484-1,ID=EL4_54-2,ID=B16_499-2,ID=B16_474-2	NA	NA
Smim1	chr4	154020588	154025966	-	6	2.89855	1.37e-14	7.27e-13	1 [0,1]	5 [2,3]	1	ID=EL4_59-1,ID=B16_489-1,ID=B16_475-2,ID=EL4_47-2,ID=B16_474-1,ID=B16_499-2	NA	NA
Zfp992	chr4	146449023	146470292	+	14	6.76329	1.79e-14	9.43e-13	11 [3,8]	3 [2,1]	1	ID=B16_488-3,ID=EL4PD1_116-3,ID=LLC_173-3,ID=EL4_18_2,ID=B16_502-3,ID=EL4_49-1,ID=B16_474-3,ID=B16_474-4,ID=B16_486-3,ID=EL4_67-1,ID=B16_462-4,ID=EL4_62-1,ID=B16_474-1,ID=B16_499-2	NA	NA
Wbscr27	chr5	134932368	134942637	+	8	3.86473	2.63e-14	1.38e-12	8 [7,1]	0 [0,0]	0.951134	ID=EL4_28_1,ID=EL4_28_2,ID=EL4_18_2,ID=EL4_22_3,ID=EL4_27_3,ID=EL4_25_3,ID=EL4_29_2,ID=B16_491-3	NA	NA
Tpbg	chr9	85842380	85847040	+	7	3.38164	3.4e-14	1.77e-12	3 [1,2]	4 [3,1]	0.946817	ID=B16_485-1,ID=B16_474-3,ID=B16_489-1,ID=B16_450-3,ID=B16_462-4,ID=EL4_47-1,ID=B16_474-1	NA	NA
Sdk1	chr5	141241490	142215586	+	22	10.628	4.59e-14	2.38e-12	21 [12,9]	1 [0,1]	1	ID=B16_463-1,ID=B16_488-3,ID=B16_464-2,ID=B16_464-1,ID=B16_485-3,ID=B16_487-2,ID=B16_498-1,ID=B16_502-3,ID=B16_460-1,ID=B16_474-3,ID=B16_474-4,ID=B16_497-2,ID=B16_485-4,ID=EL4_64-1,ID=B16_489-1,ID=B16_450-3,ID=B16_499-1,ID=B16_451-5,ID=B16_462-4,ID=EL4_65-1,ID=EL4_72-3,ID=B16_499-2	NA	NA
1700112E06Rik	chr14	22019712	23056085	+	31	14.9758	4.73e-14	2.44e-12	31 [15,16]	0 [0,0]	0.99856	ID=B16_468-4,ID=B16_463-1,ID=B16PD1_534_3,ID=B16_464-2,ID=B16_464-1,ID=B16_485-1,ID=B16_485-3,ID=B16_450-1,ID=B16_498-1,ID=B16_502-3,ID=B16_460-1,ID=B16_474-3,ID=B16_474-4,ID=B16_497-1,ID=B16_497-2,ID=B16_486-3,ID=B16_525-2,ID=B16_485-4,ID=B16_489-1,ID=B16_450-3,ID=B16_499-1,ID=B16_451-3,ID=B16_462-4,ID=B16_474-1,ID=B16_484-1,ID=B16_484-2,ID=EL4_72-3,ID=EL4_54-2,ID=B16_499-2,ID=B16_491-3,ID=B16_4…	NA	NA
Ugt1a1	chr1	88211959	88218997	+	8	3.86473	4.83e-14	2.47e-12	5 [3,2]	3 [0,3]	1	ID=B16_463-1,ID=B16_488-3,ID=B16_487-4,ID=B16_519-3,ID=B16_502-3,ID=EL4_64-5,ID=B16_499-1,ID=B16_462-4	NA	NA
Skint1	chr4	112006269	112029538	+	16	7.72947	8.82e-14	4.49e-12	15 [5,10]	1 [0,1]	0.999657	ID=B16_464-2,ID=B16_485-1,ID=B16_502-1,ID=EL4_49-1,ID=B16_460-1,ID=B16_474-3,ID=B16_474-4,ID=B16_450-3,ID=B16_451-3,ID=B16_462-4,ID=EL4_62-1,ID=B16_484-1,ID=B16_484-2,ID=B16_499-2,ID=B16_491-3,ID=B16_491-2	NA	NA
Tle1	chr4	72117142	72200919	-	28	13.5266	9.35e-14	4.74e-12	28 [17,11]	0 [-1,1]	0.963182	ID=B16_488-3,ID=B16_464-2,ID=B16_485-1,ID=B16_487-4,ID=B16_485-3,ID=B16_487-2,ID=B16_498-2,ID=B16_502-3,ID=B16_502-1,ID=B16_460-1,ID=B16_474-3,ID=B16_474-4,ID=B16_474-5,ID=B16_497-1,ID=B16_486-3,ID=B16_485-4,ID=B16_489-1,ID=B16_450-3,ID=B16_451-5,ID=B16_451-3,ID=B16_475-1,ID=B16_462-4,ID=B16_484-4,ID=B16_484-1,ID=B16_499-2,ID=B16_491-3,ID=EL4PD1_152-1,ID=B16_474-2	NA	NA
Alad	chr4	62509169	62519918	-	8	3.86473	1.25e-13	6.29e-12	5 [3,2]	3 [2,1]	1	ID=B16_464-1,ID=B16_487-4,ID=B16_498-1,ID=B16_502-1,ID=B16_474-4,ID=B16_462-4,ID=B16_491-3,ID=EL4PD1_152-1	NA	NA
Zfp988	chr4	147305674	147333734	+	16	7.72947	1.86e-13	9.33e-12	14 [4,10]	2 [1,1]	1	ID=EL4PD1_116-2,ID=B16_450-1,ID=B16_502-1,ID=B16_460-1,ID=B16_474-3,ID=B16_474-4,ID=EL4PD1_150-2,ID=B16_485-4,ID=EL4_67-2,ID=EL4_38_3,ID=B16_451-5,ID=B16_462-4,ID=EL4_62-1,ID=B16_484-4,ID=EL4_72-3,ID=EL4_54-2	NA	NA
Rnf20	chr4	49632060	49656886	+	14	6.76329	1.98e-13	9.84e-12	12 [2,10]	2 [0,2]	0.963361	ID=B16_463-1,ID=B16_455-2,ID=B16_502-3,ID=B16_12-3,ID=B16_16-1,ID=B16_474-3,ID=B16_474-4,ID=EL4_48-4,ID=B16_1-1,ID=B16_13-3,ID=B16_13-1,ID=B16_451-3,ID=B16_462-4,ID=LLC_174-1	NA	NA
Npas3	chr12	53248677	54072175	+	22	10.628	2.24e-13	1.11e-11	22 [8,14]	0 [0,0]	0.999928	ID=B16_463-1,ID=B16_488-3,ID=B16_464-2,ID=B16_464-1,ID=EL4PD1_116-3,ID=B16_485-1,ID=B16_487-4,ID=B16_498-1,ID=B16_502-3,ID=EL4_45-1,ID=B16_474-4,ID=EL4_59-1,ID=B16_486-3,ID=B16_489-1,ID=B16_450-3,ID=B16_499-1,ID=B16_451-5,ID=B16_451-3,ID=B16_462-4,ID=B16_484-1,ID=B16_499-2,ID=B16_491-3	NA	NA
Rasef	chr4	73714579	73790709	-	28	13.5266	3.05e-13	1.48e-11	26 [15,11]	2 [2,0]	0.999973	ID=B16_464-2,ID=B16_485-1,ID=B16_485-3,ID=B16_450-1,ID=B16_502-3,ID=EL4_49-1,ID=B16_460-1,ID=B16_474-3,ID=B16_474-4,ID=B16_474-5,ID=B16_497-2,ID=EL4_34_5,ID=B16_485-4,ID=B16_489-1,ID=B16_450-3,ID=B16_499-1,ID=EL4PD1_118-2,ID=B16_451-3,ID=B16_475-1,ID=B16_462-4,ID=EL4_62-1,ID=B16_484-1,ID=EL4PD1_117-3,ID=B16_484-2,ID=EL4_72-3,ID=B16_499-2,ID=EL4_61-2,ID=B16_491-3	NA	NA
Asic2	chr11	80880169	81968457	-	27	13.0435	4.02e-13	1.95e-11	27 [11,16]	0 [0,0]	1	ID=B16_463-1,ID=B16PD1_534_2,ID=B16_464-1,ID=B16_485-1,ID=EL4_68-1,ID=B16_498-1,ID=B16_519-1,ID=B16_502-3,ID=B16_460-1,ID=B16PD1_533_1,ID=B16_474-3,ID=B16_474-4,ID=B16_474-5,ID=B16_497-1,ID=EL4_19_2,ID=EL4_32_2,ID=B16PD1_531_1,ID=B16_450-3,ID=B16_449-4,ID=B16_499-1,ID=B16_451-5,ID=B16_451-3,ID=B16_462-4,ID=EL4_65-1,ID=B16_484-1,ID=B16_484-2,ID=B16_491-3	NA	NA
Pgm3	chr9	86554377	86571827	-	11	5.31401	4.91e-13	2.36e-11	8 [4,4]	3 [1,2]	1	ID=B16_464-2,ID=B16_498-1,ID=B16_502-3,ID=B16_460-1,ID=B16_474-3,ID=B16_474-4,ID=B16_474-5,ID=B16_497-2,ID=B16_474-1,ID=B16_491-3,ID=B16_474-2	NA	NA
Lrrtm4	chr6	80018877	80810143	+	31	14.9758	5.55e-13	2.66e-11	31 [18,13]	0 [0,0]	0.981805	ID=B16_463-1,ID=B16_488-3,ID=EL4_26_4,ID=B16_464-2,ID=B16_464-1,ID=B16_487-4,ID=B16_487-2,ID=EL4_18_2,ID=B16_502-3,ID=EL4_45-1,ID=EL4_37_2,ID=B16PD1_537_4,ID=B16_474-3,ID=B16_474-4,ID=B16_497-1,ID=EL4_27_3,ID=EL4PD1_114-1,ID=B16_485-4,ID=EL4_25_3,ID=EL4PD1_157-2,ID=EL4_38_3,ID=B16_489-1,ID=B16_450-3,ID=B16_499-1,ID=B16_451-3,ID=B16_462-4,ID=B16_484-1,ID=B16_484-2,ID=EL4PD1_118-1,ID=B16_499-2,ID=B…	NA	NA
Sp110	chr1	85576899	85598817	-	11	5.31401	7.11e-13	3.39e-11	6 [4,2]	5 [1,4]	1	ID=B16_464-1,ID=EL4PD1_149-4,ID=EL4PD1_113-1,ID=EL4_32_2,ID=EL4_67-2,ID=EL4_64-5,ID=EL4_64-2,ID=EL4PD1_156-4,ID=EL4_65-1,ID=B16PD1_160-3,ID=EL4PD1_118-1	NA	NA
Wwox	chr8	114439655	115352708	+	16	7.72947	9.43e-13	4.4e-11	16 [8,8]	0 [0,0]	1	ID=B16_463-1,ID=B16_488-3,ID=B16_464-2,ID=B16_487-4,ID=EL4PD1_114-3,ID=B16_450-1,ID=B16_485-2,ID=B16_474-3,ID=B16_474-4,ID=B16_497-1,ID=B16_489-1,ID=B16_450-3,ID=B16_451-3,ID=B16_462-4,ID=EL4_44-2,ID=B16_499-2	NA	NA
Dach2	chrX	113297510	113836386	+	15	7.24638	1.31e-12	6.07e-11	15 [8,7]	0 [0,0]	0.950604	ID=EL4_26_4,ID=B16_464-2,ID=EL4_18_2,ID=B16_502-3,ID=B16_485-2,ID=B16_474-4,ID=EL4_32_2,ID=EL4_36_4,ID=B16_499-1,ID=B16_451-5,ID=EL4_62-1,ID=EL4_29_2,ID=B16_491-3,ID=B16_491-2,ID=B16_474-2	NA	NA
Zfp804b	chr5	6769010	7344756	-	16	7.72947	1.82e-12	8.35e-11	16 [7,9]	0 [0,0]	1	ID=B16_463-1,ID=B16_488-3,ID=B16_464-2,ID=B16_464-1,ID=B16_502-3,ID=EL4_49-1,ID=B16PD1_537_1,ID=B16_485-2,ID=B16_474-3,ID=B16_497-2,ID=EL4_33_2,ID=EL4_36_2,ID=B16_451-3,ID=B16_484-1,ID=EL4_54-2,ID=B16_491-2	NA	NA
Gml	chr15	74813454	74818815	-	6	2.89855	2.06e-12	9.36e-11	1 [1,0]	5 [0,5]	1	ID=B16_488-3,ID=B16PD1_537_1,ID=B16_489-1,ID=B16_484-2,ID=B16_499-2,ID=B16_491-2	NA	NA
Papss2	chr19	32620005	32667187	+	18	8.69565	2.24e-12	1.01e-10	18 [18,0]	0 [0,0]	1	ID=EL4PD1_116-3,ID=EL4_68-1,ID=B16_519-1,ID=B16PD1_533_1,ID=EL4_32_3,ID=EL4_67-2,ID=EL4_25_3,ID=EL4_36_4,ID=EL4PD1_157-1,ID=EL4_38_3,ID=EL4PD1_156-4,ID=EL4_24_1,ID=EL4PD1_104-3,ID=B16_14-1,ID=EL4_52-2,ID=B16_499-2,ID=EL4PD1_152-3,ID=LLC_167-1	NA	NA
CK137956	chr4	127927592	127970951	-	15	7.24638	2.42e-12	1.08e-10	15 [4,11]	0 [0,0]	1	ID=B16_488-3,ID=B16_464-2,ID=B16_502-3,ID=B16_485-2,ID=B16_474-4,ID=B16_474-5,ID=EL4_27_3,ID=B16_450-3,ID=B16_451-3,ID=B16_462-4,ID=EL4_62-1,ID=LLC_170-1,ID=EL4_72-3,ID=B16_499-2,ID=B16_491-3	NA	NA
Ctnnd2	chr15	30172593	31029311	+	28	13.5266	2.68e-12	1.19e-10	27 [17,10]	1 [0,1]	1	ID=B16_463-1,ID=B16PD1_534_1,ID=B16_464-1,ID=EL4_60-1,ID=B16_485-3,ID=B16_487-2,ID=B16_450-1,ID=B16_498-1,ID=EL4_18_2,ID=EL4PD1_149-4,ID=B16_4-2,ID=B16_460-1,ID=B16PD1_533_2,ID=B16_474-3,ID=B16_474-4,ID=EL4PD1_113-1,ID=EL4_64-1,ID=B16_489-1,ID=B16_449-4,ID=EL4_24_1,ID=B16_461-1,ID=B16_462-4,ID=EL4_62-1,ID=B16_484-1,ID=EL4PD1_117-1,ID=B16_499-2,ID=B16_491-3,ID=B16_474-2	NA	NA
Gml2	chr15	74819088	74834871	+	10	4.83092	3.89e-12	1.71e-10	10 [6,4]	0 [0,0]	1	ID=B16_488-3,ID=B16_487-4,ID=B16_497-2,ID=B16_489-1,ID=B16_449-4,ID=B16_499-1,ID=B16_484-1,ID=B16_484-2,ID=B16_499-2,ID=B16_491-2	NA	NA
Zfhx3	chr8	107942644	108961630	+	27	13.0435	4.7e-12	2.04e-10	27 [20,7]	0 [0,0]	0.975453	ID=B16_463-1,ID=B16_3-4,ID=B16_455-2,ID=B16_464-2,ID=B16_464-1,ID=EL4PD1_116-3,ID=B16_487-4,ID=B16_450-1,ID=B16_498-1,ID=B16_502-1,ID=B16PD1_537_4,ID=B16_474-3,ID=B16_474-4,ID=B16_16-4,ID=EL4PD1_150-2,ID=EL4PD1_153-3,ID=B16_485-4,ID=EL4_36_3,ID=B16_489-1,ID=B16_499-1,ID=B16_475-1,ID=B16_462-4,ID=B16_17-1,ID=B16_474-1,ID=B16_499-2,ID=B16_515-1,ID=B16_474-2	NA	NA
Fstl5	chr3	76074270	76710019	+	24	11.5942	5.22e-12	2.26e-10	23 [13,10]	1 [0,1]	1	ID=EL4_41-1,ID=B16_463-1,ID=B16_464-2,ID=B16_464-1,ID=B16_487-4,ID=B16_485-3,ID=B16_498-2,ID=B16_498-1,ID=B16_502-3,ID=B16_460-1,ID=B16_474-3,ID=B16_474-4,ID=B16_474-5,ID=EL4_27_3,ID=B16_486-3,ID=EL4_64-1,ID=B16_451-5,ID=B16_462-4,ID=B16_484-4,ID=B16_484-1,ID=B16_484-2,ID=EL4PD1_118-1,ID=B16_499-2,ID=B16_491-3	NA	NA
Erc2	chr14	27622428	28478535	+	25	12.0773	5.46e-12	2.35e-10	25 [16,9]	0 [0,0]	0.999343	ID=B16_463-1,ID=B16_488-3,ID=B16_464-1,ID=B16_485-1,ID=B16_487-4,ID=B16_485-3,ID=B16_502-3,ID=B16_502-1,ID=EL4_49-1,ID=B16_460-1,ID=EL4_22_3,ID=B16_474-3,ID=B16_474-4,ID=B16_497-1,ID=EL4_64-1,ID=B16_489-1,ID=B16_450-3,ID=B16_499-1,ID=B16_451-5,ID=B16_462-4,ID=LLC_174-1,ID=B16_474-1,ID=B16_484-1,ID=B16_484-2,ID=B16_499-2	NA	NA
Fgf14	chr14	123977907	124677127	-	25	12.0773	7.13e-12	3.04e-10	25 [17,8]	0 [0,0]	0.994869	ID=B16PD1_534_3,ID=B16_488-3,ID=B16_464-2,ID=B16_464-1,ID=EL4_60-1,ID=B16_456-4,ID=B16_487-4,ID=EL4_18_2,ID=B16_4-2,ID=B16_474-3,ID=B16_474-4,ID=EL4PD1_113-2,ID=EL4_67-1,ID=B16_521-2,ID=EL4_36_3,ID=B16_489-1,ID=B16_450-3,ID=B16_499-1,ID=B16_451-3,ID=B16_475-2,ID=B16_462-4,ID=B16_484-1,ID=B16_484-2,ID=B16_499-2,ID=EL4_29_2	NA	NA
Ncl	chr1	86344719	86359400	-	10	4.83092	8.23e-12	3.48e-10	10 [3,7]	0 [0,0]	0.918316	ID=B16_463-1,ID=EL4_28_4,ID=EL4_28_1,ID=EL4_28_2,ID=EL4_26_4,ID=EL4_32_1,ID=B16PD1_537_2,ID=EL4_32_2,ID=EL4_25_3,ID=B16_499-1	NA	NA
Brinp1	chr4	68761514	68954397	-	48	23.1884	1.02e-11	4.29e-10	48 [21,27]	0 [0,0]	0.984885	ID=B16_463-1,ID=B16PD1_534_2,ID=B16_488-3,ID=B16_464-2,ID=EL4_60-1,ID=EL4PD1_116-3,ID=B16_485-1,ID=B16_487-4,ID=B16_485-3,ID=B16_487-2,ID=B16_450-1,ID=B16_498-1,ID=B16_519-3,ID=B16_502-3,ID=EL4_49-1,ID=B16_460-1,ID=B16_485-2,ID=B16_474-3,ID=B16_474-4,ID=B16_474-5,ID=B16_497-1,ID=EL4_19_2,ID=EL4_59-1,ID=EL4PD1_115-3,ID=B16_485-4,ID=EL4_64-1,ID=EL4_38_3,ID=B16_489-1,ID=B16_450-3,ID=B16_449-4,ID=B16…	NA	NA
Exoc4	chr6	33249085	33973979	+	23	11.1111	1.32e-11	5.53e-10	23 [13,10]	0 [0,0]	1	ID=B16_463-1,ID=B16_464-2,ID=B16_498-1,ID=B16_502-3,ID=B16_460-1,ID=EL4_45-1,ID=B16_474-3,ID=B16_474-4,ID=B16_497-1,ID=EL4_32_3,ID=B16_485-4,ID=B16_489-1,ID=B16_450-3,ID=B16_499-1,ID=B16_451-5,ID=B16_451-3,ID=B16_475-1,ID=B16_462-4,ID=EL4_44-2,ID=EL4PD1_152-2,ID=B16_499-2,ID=B16_491-3,ID=LLC_167-1	NA	NA
Olfr982	chr9	40073829	40079404	+	8	3.86473	1.39e-11	5.78e-10	4 [1,3]	4 [1,3]	1	ID=B16_487-4,ID=B16_460-1,ID=EL4_64-1,ID=B16_474-1,ID=B16_484-4,ID=B16_484-2,ID=B16_499-2,ID=B16_474-2	NA	NA
Naaladl2	chr3	23798102	24783622	-	58	28.0193	1.63e-11	6.71e-10	58 [46,12]	0 [0,0]	0.934055	ID=B16_463-1,ID=B16_455-2,ID=B16_455-1,ID=B16_488-3,ID=EL4PD1_116-1,ID=B16_101NT-3,ID=B16_464-2,ID=B16_464-1,ID=B16_456-4,ID=B16_487-4,ID=B16_485-3,ID=B16_519-1,ID=B16_502-3,ID=B16_452-1,ID=B16_460-1,ID=B16PD1_537_1,ID=B16_485-2,ID=B16_474-4,ID=B16_474-5,ID=B16_497-1,ID=EL4_32_3,ID=EL4_34_5,ID=EL4_33_2,ID=B16_525-2,ID=B16_525-1,ID=B16_485-4,ID=B16_521-2,ID=B16_521-1,ID=B16PD1_532_1,ID=B16_454-3,I…	NA	NA
Lama2	chr10	26981285	27616843	-	20	9.66184	1.85e-11	7.59e-10	20 [9,11]	0 [0,0]	1	ID=B16_463-1,ID=B16_488-3,ID=B16_464-1,ID=B16_485-3,ID=LLC_172-2,ID=B16_502-3,ID=B16_474-3,ID=B16_474-4,ID=B16_486-3,ID=EL4_36_3,ID=B16_449-4,ID=B16_499-1,ID=B16_451-5,ID=B16_451-3,ID=B16_462-4,ID=B16_474-1,ID=B16_484-1,ID=B16_484-2,ID=EL4_54-2,ID=B16_474-2	NA	NA
Dpp6	chr5	26817357	27726460	+	23	11.1111	1.89e-11	7.72e-10	23 [12,11]	0 [0,0]	0.980645	ID=B16_488-3,ID=B16_464-2,ID=B16_464-1,ID=B16_485-1,ID=B16_487-4,ID=B16_487-2,ID=B16_498-2,ID=B16_460-1,ID=B16_474-3,ID=B16_474-5,ID=EL4_32_3,ID=EL4_55-2,ID=EL4PD1_113-1,ID=B16_485-4,ID=B16_489-1,ID=B16_450-3,ID=B16_449-4,ID=B16_451-5,ID=B16_462-4,ID=B16_484-1,ID=B16_451-4,ID=B16_515-2,ID=B16_491-3	NA	NA
Etl4	chr2	19909780	20744816	+	26	12.5604	1.98e-11	8.07e-10	26 [15,11]	0 [0,0]	1	ID=B16_463-1,ID=B16_488-3,ID=B16_464-1,ID=B16_485-1,ID=B16_487-4,ID=B16_498-1,ID=B16_460-1,ID=B16PD1_537_2,ID=B16_485-2,ID=B16_474-3,ID=B16_474-4,ID=B16_497-1,ID=EL4_36_4,ID=EL4_36_3,ID=EL4_36_2,ID=EL4PD1_157-2,ID=EL4_38_3,ID=B16_489-1,ID=B16_450-3,ID=B16_449-4,ID=B16_499-1,ID=B16_451-3,ID=B16_475-1,ID=B16_462-4,ID=B16_484-2,ID=B16_499-2	NA	NA
Galnt13	chr2	54436317	55118309	+	27	13.0435	2.11e-11	8.55e-10	27 [9,18]	0 [0,0]	0.999749	ID=B16_463-1,ID=B16_488-3,ID=B16_464-2,ID=B16_464-1,ID=B16_456-4,ID=B16_487-4,ID=B16_498-2,ID=B16_498-1,ID=B16_474-3,ID=B16_474-4,ID=B16_497-1,ID=EL4_32_3,ID=B16_486-3,ID=B16_485-4,ID=B16PD1_531_1,ID=EL4_64-2,ID=B16_454-3,ID=EL4_36_3,ID=B16_489-1,ID=B16_1-1,ID=B16_499-1,ID=B16_451-5,ID=B16_475-2,ID=B16_484-1,ID=B16_499-2,ID=EL4_61-2,ID=B16_474-2	NA	NA
Baat	chr4	49489422	49506557	-	11	5.31401	2.17e-11	8.73e-10	8 [6,2]	3 [1,2]	1	ID=B16_488-3,ID=B16_502-3,ID=B16_474-3,ID=B16_474-4,ID=EL4PD1_153-3,ID=EL4_64-1,ID=B16_451-5,ID=B16_484-4,ID=B16_484-2,ID=B16_515-1,ID=B16_491-3	NA	NA
Nutm1	chr2	112247948	112259291	-	8	3.86473	2.28e-11	9.15e-10	8 [8,0]	0 [0,0]	0.916026	ID=EL4_41-1,ID=EL4PD1_116-1,ID=EL4_32_1,ID=EL4_67-2,ID=EL4_64-1,ID=B16_522-1,ID=B16_451-5,ID=EL4_54-3	NA	NA
Rab3il1	chr19	10001669	10035586	+	12	5.7971	2.76e-11	1.1e-09	11 [4,7]	1 [0,1]	0.935897	ID=B16_456-4,ID=B16_12-3,ID=B16_16-2,ID=B16_525-2,ID=B16_521-1,ID=B16_454-3,ID=B16_2-2,ID=B16_522-1,ID=B16_13-3,ID=B16_453-2,ID=EL4_72-3,ID=B16_516-2	NA	NA
Zfp534	chr4	147673502	147702553	-	15	7.24638	3.1e-11	1.23e-09	11 [6,5]	4 [3,1]	1	ID=EL4PD1_116-2,ID=EL4_60-2,ID=B16_464-2,ID=EL4PD1_156-2,ID=EL4PD1_116-3,ID=EL4_22_3,ID=B16_474-3,ID=EL4_67-2,ID=EL4_38_3,ID=B16_462-4,ID=EL4PD1_152-2,ID=EL4_62-1,ID=B16_474-1,ID=EL4PD1_119-1,ID=B16_516-2	NA	NA
Rad23b	chr4	55350043	55392237	+	18	8.69565	3.36e-11	1.33e-09	18 [10,8]	0 [0,0]	1	ID=B16_488-3,ID=B16_464-2,ID=B16_485-1,ID=B16_450-1,ID=B16_498-1,ID=B16_502-3,ID=B16_460-1,ID=EL4_45-1,ID=B16_474-3,ID=B16_474-4,ID=B16_486-3,ID=EL4PD1_115-3,ID=EL4PD1_150-2,ID=B16_485-4,ID=EL4_39-4,ID=B16_451-5,ID=B16_462-4,ID=B16_484-1	NA	NA
Auts2	chr5	131437333	132543344	-	41	19.8068	3.5e-11	1.38e-09	41 [24,17]	0 [0,0]	0.962788	ID=B16_463-1,ID=B16_455-2,ID=B16_455-1,ID=B16_488-3,ID=B16_464-2,ID=B16_464-1,ID=B16_456-4,ID=B16_485-1,ID=B16_487-4,ID=B16_485-3,ID=B16_487-2,ID=B16_498-2,ID=B16_498-1,ID=B16_502-3,ID=B16_502-1,ID=B16_460-1,ID=B16_485-2,ID=B16_474-3,ID=B16_474-4,ID=B16_486-3,ID=EL4PD1_115-3,ID=EL4PD1_113-1,ID=B16_521-1,ID=B16_489-1,ID=B16_450-3,ID=B16_449-3,ID=B16_449-4,ID=B16_522-1,ID=B16_499-1,ID=B16_453-2,ID=…	NA	NA
Nell1	chr7	49974864	50866608	+	33	15.942	3.59e-11	1.41e-09	33 [16,17]	0 [0,0]	1	ID=B16_463-1,ID=B16PD1_534_3,ID=EL4_28_2,ID=EL4_28_3,ID=B16_488-3,ID=EL4_26_4,ID=EL4_63-1,ID=B16_464-2,ID=B16_464-1,ID=EL4PD1_116-3,ID=B16_485-1,ID=B16_487-4,ID=B16_487-2,ID=B16_450-1,ID=EL4_18_2,ID=EL4_45-1,ID=B16_12-3,ID=B16_474-3,ID=B16_474-4,ID=B16_497-1,ID=EL4_55-2,ID=B16_485-4,ID=EL4_67-1,ID=B16_489-1,ID=B16_450-3,ID=B16_499-1,ID=EL4_24_1,ID=B16_462-4,ID=EL4_62-1,ID=B16_474-1,ID=B16_524-2,I…	NA	NA
Impad1	chr4	4762484	4793355	-	16	7.72947	3.76e-11	1.47e-09	15 [9,6]	1 [0,1]	1	ID=B16_463-1,ID=B16_455-2,ID=B16_464-2,ID=B16_464-1,ID=B16_485-1,ID=B16_474-4,ID=EL4_59-1,ID=EL4_64-1,ID=B16_450-3,ID=B16_451-5,ID=B16_475-1,ID=B16_462-4,ID=B16_474-1,ID=LLC_170-1,ID=B16_499-2,ID=B16_474-2	NA	NA
Ralyl	chr3	13471682	14181972	+	30	14.4928	4.41e-11	1.71e-09	30 [12,18]	0 [0,0]	0.985695	ID=B16_463-1,ID=B16_488-3,ID=B16_464-2,ID=B16_464-1,ID=B16_487-4,ID=B16_485-3,ID=B16_498-1,ID=B16_502-3,ID=B16_474-3,ID=B16_474-4,ID=B16_497-1,ID=EL4_59-1,ID=B16_486-3,ID=EL4_67-2,ID=EL4_64-1,ID=B16_454-3,ID=B16_517-1,ID=B16_489-1,ID=B16_450-3,ID=B16_449-4,ID=B16_499-1,ID=B16_451-3,ID=B16_462-4,ID=EL4_62-1,ID=B16_474-1,ID=B16_484-1,ID=B16_484-2,ID=B16_524-2,ID=B16_499-2,ID=B16_491-3	NA	NA
Sugct	chr13	16857472	17694739	-	35	16.9082	4.65e-11	1.79e-09	35 [24,11]	0 [0,0]	1	ID=B16_463-1,ID=B16_488-3,ID=EL4_26_4,ID=B16_464-2,ID=B16_464-1,ID=EL4PD1_116-3,ID=B16_485-1,ID=B16_450-1,ID=B16_498-1,ID=EL4_18_2,ID=B16_502-3,ID=B16_460-1,ID=EL4_45-1,ID=B16PD1_533_1,ID=B16PD1_537_1,ID=B16_485-2,ID=B16_474-3,ID=B16_474-4,ID=EL4_19_2,ID=B16_486-3,ID=B16_525-1,ID=B16PD1_531_1,ID=EL4_67-2,ID=B16_2-2,ID=B16_450-3,ID=B16_522-1,ID=B16_499-1,ID=B16_451-5,ID=B16_451-3,ID=B16_462-4,ID=E…	NA	NA
Negr1	chr3	156561794	157316445	+	25	12.0773	5.75e-11	2.2e-09	25 [14,11]	0 [0,0]	1	ID=B16_463-1,ID=B16_488-3,ID=B16_464-2,ID=B16_464-1,ID=B16_456-4,ID=B16_487-4,ID=B16_485-3,ID=B16_502-3,ID=EL4_22_3,ID=B16_485-2,ID=B16_474-3,ID=B16_474-4,ID=B16_486-3,ID=EL4_55-2,ID=EL4PD1_150-3,ID=EL4_67-2,ID=B16_521-2,ID=B16_489-1,ID=B16_499-1,ID=B16_475-1,ID=B16_462-4,ID=B16_484-2,ID=B16_499-2,ID=B16_491-3,ID=B16_516-2	NA	NA
Magi1	chr6	93675455	94283917	-	10	4.83092	6.45e-11	2.46e-09	10 [6,4]	0 [0,0]	1	ID=B16_464-1,ID=B16_485-3,ID=B16_498-2,ID=B16_460-1,ID=B16_474-3,ID=B16_474-4,ID=B16PD1_532_2,ID=EL4_36_3,ID=B16_489-1,ID=B16_462-4	NA	NA
Zfp991	chr4	147132038	147180579	+	19	9.17874	7.19e-11	2.73e-09	16 [5,11]	3 [3,0]	1	ID=EL4PD1_116-2,ID=EL4_28_4,ID=B16_488-3,ID=B16_464-2,ID=B16_485-1,ID=EL4_18_2,ID=B16_16-3,ID=B16_474-4,ID=EL4_52-5,ID=EL4PD1_154-1,ID=B16_522-2,ID=B16_462-4,ID=B16PD1_163-3,ID=EL4_62-1,ID=EL4_72-3,ID=EL4_54-2,ID=B16_491-3,ID=EL4PD1_152-1,ID=B16_491-2	NA	NA
Frmd3	chr4	74013442	74202214	+	46	22.2222	9.42e-11	3.54e-09	46 [30,16]	0 [0,0]	1	ID=EL4PD1_116-2,ID=EL4_60-2,ID=B16_488-3,ID=EL4PD1_116-1,ID=B16_464-2,ID=B16_464-1,ID=B16_485-1,ID=B16_487-4,ID=B16_485-3,ID=B16_487-2,ID=B16_498-2,ID=B16_498-1,ID=B16_502-3,ID=B16_460-1,ID=EL4_22_3,ID=B16_485-2,ID=B16_474-3,ID=B16_474-4,ID=B16_474-5,ID=B16_497-1,ID=EL4_48-4,ID=EL4PD1_114-1,ID=EL4_34_5,ID=EL4PD1_150-2,ID=B16_485-4,ID=EL4_52-5,ID=EL4_64-1,ID=B16_489-1,ID=B16_450-3,ID=B16_449-4,ID=…	NA	NA
7420461P10Rik	chr1	162647203	162658219	-	8	3.86473	9.42e-11	3.54e-09	7 [0,7]	1 [0,1]	0.866084	ID=B16_463-1,ID=B16PD1_534_1,ID=EL4_37_2,ID=EL4_34_5,ID=EL4_59-1,ID=B16PD1_532_1,ID=EL4_36_3,ID=B16_499-2	NA	NA
Pdia4	chr6	47796141	47813430	-	10	4.83092	1.02e-10	3.83e-09	10 [4,6]	0 [0,0]	1	ID=B16PD1_534_3,ID=EL4_28_3,ID=EL4_60-2,ID=B16_498-2,ID=EL4_32_3,ID=EL4_33_2,ID=EL4_32_2,ID=B16PD1_531_1,ID=EL4_67-1,ID=B16_491-3	NA	NA
Fam19a1	chr6	96113154	96657198	+	11	5.31401	1.07e-10	3.99e-09	11 [7,4]	0 [0,0]	1	ID=B16_463-1,ID=B16_464-2,ID=B16_464-1,ID=B16_450-1,ID=B16_452-1,ID=B16_474-3,ID=B16_474-4,ID=EL4_34_5,ID=EL4_33_2,ID=B16_485-4,ID=LLC_174-1	NA	NA
Edil3	chr13	88821511	89323223	+	15	7.24638	1.11e-10	4.11e-09	15 [4,11]	0 [0,0]	1	ID=B16_463-1,ID=B16_464-1,ID=B16_498-1,ID=B16_502-3,ID=B16_474-3,ID=B16_474-4,ID=B16_497-2,ID=EL4_36_3,ID=B16_489-1,ID=B16_450-3,ID=B16_451-5,ID=B16_451-3,ID=B16_462-4,ID=B16_499-2,ID=B16_491-3	NA	NA
Olfr146	chr9	39018073	39023362	-	8	3.86473	1.23e-10	4.55e-09	3 [3,0]	5 [4,1]	1	ID=B16_488-3,ID=B16_464-2,ID=B16_450-1,ID=B16_502-3,ID=B16_474-3,ID=B16_474-4,ID=B16_462-4,ID=EL4_47-1	NA	NA
Lepr	chr4	101717404	101815352	+	28	13.5266	1.99e-10	7.32e-09	25 [12,13]	3 [1,2]	1	ID=EL4_28_2,ID=EL4_28_3,ID=EL4_26_4,ID=B16_464-2,ID=B16_464-1,ID=B16_485-1,ID=B16_485-3,ID=B16_487-2,ID=B16_502-3,ID=B16_502-1,ID=EL4_22_3,ID=B16PD1_537_4,ID=B16_485-2,ID=B16_474-3,ID=B16_474-4,ID=B16_474-5,ID=EL4_19_2,ID=EL4_27_3,ID=EL4_55-2,ID=EL4_39-4,ID=B16_489-1,ID=B16_450-3,ID=B16_499-1,ID=B16_451-5,ID=B16_451-3,ID=B16_462-4,ID=EL4PD1_118-1,ID=B16_499-2	NA	NA
Mup-ps18	chr4	61874700	61883296	-	8	3.86473	2.14e-10	7.84e-09	4 [0,4]	4 [3,1]	1	ID=B16_488-3,ID=B16_487-2,ID=B16_450-1,ID=B16_474-3,ID=B16_474-4,ID=B16_485-4,ID=B16_499-1,ID=B16_491-3	NA	NA
Olfr275	chr4	52814604	52828269	+	10	4.83092	2.16e-10	7.89e-09	9 [6,3]	1 [1,0]	0.916035	ID=B16_488-3,ID=B16_464-2,ID=B16_502-3,ID=B16_460-1,ID=B16_485-2,ID=B16_474-3,ID=B16_474-4,ID=B16_489-1,ID=B16_451-3,ID=B16_462-4	NA	NA
AL928588.1	chr4	52842198	52843046	-	5	2.41546	2.18e-10	7.93e-09	2 [0,2]	3 [2,1]	1	ID=B16_502-1,ID=EL4_46-2,ID=B16_474-3,ID=B16_474-4,ID=B16_462-4	NA	NA
Grm5	chr7	87584393	88134907	+	17	8.21256	2.93e-10	1.06e-08	17 [7,10]	0 [0,0]	1	ID=B16_463-1,ID=B16_488-3,ID=B16_464-2,ID=B16_464-1,ID=B16_450-1,ID=B16_502-3,ID=B16_474-3,ID=B16_474-4,ID=B16_486-3,ID=B16_485-4,ID=EL4_38_3,ID=B16_489-1,ID=B16_499-1,ID=B16_451-5,ID=B16_475-2,ID=B16_462-4,ID=EL4PD1_117-3	NA	NA
5730522E02Rik	chr11	25617668	26210569	-	16	7.72947	3e-10	1.08e-08	16 [8,8]	0 [1,-1]	1	ID=B16_463-1,ID=B16_464-2,ID=B16_464-1,ID=B16_487-2,ID=B16_460-1,ID=B16_16-3,ID=B16_474-3,ID=B16_474-4,ID=B16_474-5,ID=B16_486-3,ID=EL4_64-1,ID=B16_489-1,ID=B16_499-1,ID=B16_462-4,ID=EL4_72-3,ID=B16_491-3	NA	NA
Cdh13	chr8	118283733	119324921	+	30	14.4928	3.86e-10	1.39e-08	30 [14,16]	0 [0,0]	0.999182	ID=B16_463-1,ID=EL4_28_1,ID=EL4_60-2,ID=B16_488-3,ID=B16_464-2,ID=B16_464-1,ID=EL4PD1_114-3,ID=EL4_68-1,ID=B16_498-1,ID=B16_502-1,ID=EL4_49-1,ID=B16_460-1,ID=B16_474-3,ID=B16_474-4,ID=B16_497-1,ID=EL4PD1_114-1,ID=B16_486-3,ID=B16_485-4,ID=B16_489-1,ID=B16_450-3,ID=B16_449-3,ID=B16_499-1,ID=B16_462-4,ID=EL4PD1_117-3,ID=EL4_72-3,ID=EL4_54-3,ID=B16_499-2,ID=B16_491-3,ID=B16_491-2,ID=EL4PD1_118-3	NA	NA
Arhgap15	chr2	43748824	44395953	+	22	10.628	4.04e-10	1.45e-08	22 [9,13]	0 [0,0]	0.988914	ID=B16_463-1,ID=B16_101NT-3,ID=B16_464-2,ID=B16_464-1,ID=B16_456-4,ID=B16_487-2,ID=B16_450-1,ID=B16_498-1,ID=B16_502-3,ID=B16_16-3,ID=B16_474-4,ID=B16_474-5,ID=B16_485-4,ID=EL4_64-1,ID=B16_449-4,ID=B16_499-1,ID=B16_451-5,ID=B16_462-4,ID=EL4_62-1,ID=B16_484-1,ID=B16_491-3,ID=B16_491-2	NA	NA
Zbtb20	chr16	42907652	43642602	+	30	14.4928	4.88e-10	1.74e-08	30 [14,16]	0 [0,0]	1	ID=EL4PD1_116-2,ID=B16_463-1,ID=EL4_28_4,ID=B16_488-3,ID=B16_464-1,ID=B16_487-4,ID=B16_502-3,ID=B16_502-1,ID=EL4_49-1,ID=B16_460-1,ID=B16PD1_537_4,ID=B16_485-2,ID=B16_497-1,ID=EL4_19_2,ID=B16_497-2,ID=B16_485-4,ID=EL4_67-1,ID=EL4_36_2,ID=B16_489-1,ID=B16_450-3,ID=EL4_70-3,ID=B16_499-1,ID=B16_451-3,ID=B16_462-4,ID=B16_474-1,ID=B16_484-1,ID=EL4_54-2,ID=B16_499-2,ID=B16_491-3,ID=B16_491-2	NA	NA
Cyp2j5	chr4	96628773	96664154	-	16	7.72947	5.15e-10	1.83e-08	14 [8,6]	2 [2,0]	1	ID=B16PD1_534_3,ID=B16PD1_534_1,ID=B16_464-2,ID=B16_464-1,ID=B16_460-1,ID=B16_474-3,ID=B16_474-4,ID=B16_474-5,ID=B16_497-1,ID=B16_489-1,ID=B16_450-3,ID=B16_462-4,ID=LLC_174-1,ID=EL4_47-1,ID=B16_484-2,ID=B16_499-2	NA	NA
Hcrtr2	chr9	76225880	76323611	-	30	14.4928	5.25e-10	1.86e-08	29 [14,15]	1 [1,0]	0.991455	ID=EL4_28_4,ID=B16_488-3,ID=B16_101NT-3,ID=B16_464-2,ID=B16_464-1,ID=B16_485-1,ID=B16_487-4,ID=B16_485-3,ID=B16_450-1,ID=B16_498-2,ID=B16_502-3,ID=B16_460-1,ID=B16PD1_533_2,ID=B16PD1_533_3,ID=B16_474-3,ID=B16_474-4,ID=B16_497-1,ID=B16_486-3,ID=B16_485-4,ID=EL4_64-1,ID=EL4_36_3,ID=B16_489-1,ID=B16_450-3,ID=B16_499-1,ID=B16_451-5,ID=B16_462-4,ID=B16PD1_160-2,ID=EL4_62-1,ID=EL4PD1_152-1,ID=B16_491-2	NA	NA
C8a	chr4	104815679	104876398	-	19	9.17874	5.51e-10	1.92e-08	19 [6,13]	0 [0,0]	1	ID=B16_464-2,ID=EL4_60-1,ID=B16_485-1,ID=B16_498-1,ID=B16_502-3,ID=B16_502-1,ID=EL4_49-1,ID=B16_485-2,ID=B16_474-3,ID=B16_474-4,ID=B16_497-1,ID=B16_486-3,ID=B16_485-4,ID=B16_489-1,ID=B16_450-3,ID=B16_451-3,ID=B16_462-4,ID=EL4_62-1,ID=B16_491-3	NA	NA
Ccdc27	chr4	154026639	154042677	-	8	3.86473	5.54e-10	1.93e-08	8 [2,6]	0 [0,0]	1	ID=EL4_59-1,ID=EL4_67-2,ID=EL4_64-5,ID=B16_489-1,ID=B16_451-3,ID=EL4_47-2,ID=B16_474-1,ID=B16_499-2	NA	NA
Cntnap5c	chr17	57769570	58410342	+	21	10.1449	6.03e-10	2.08e-08	18 [9,9]	3 [3,0]	1	ID=B16_463-1,ID=EL4_28_2,ID=B16_488-3,ID=B16_464-2,ID=B16_464-1,ID=B16_498-2,ID=EL4_18_2,ID=B16_460-1,ID=B16_474-3,ID=B16_474-4,ID=EL4_32_3,ID=EL4PD1_114-1,ID=EL4_32_2,ID=EL4_64-1,ID=B16_450-3,ID=B16_499-1,ID=B16_451-5,ID=B16_453-2,ID=B16_451-3,ID=B16_499-2,ID=B16_491-2	NA	NA
Zfp600	chr4	146156824	146198749	+	17	8.21256	5.99e-10	2.08e-08	15 [10,5]	2 [1,1]	1	ID=B16PD1_534_3,ID=B16_488-3,ID=B16_101NT-3,ID=B16_464-2,ID=B16_450-1,ID=B16_502-3,ID=B16_485-2,ID=B16_474-4,ID=B16_497-1,ID=EL4PD1_150-2,ID=B16_525-2,ID=EL4PD1_118-2,ID=B16_451-3,ID=EL4_62-1,ID=EL4_72-3,ID=B16_491-3,ID=EL4PD1_152-1	NA	NA
Mageb18	chrX	92118879	92599572	-	13	6.28019	6.46e-10	2.22e-08	13 [6,7]	0 [0,0]	0.997016	ID=B16_464-2,ID=B16_464-1,ID=B16_485-1,ID=B16_502-3,ID=B16PD1_537_4,ID=B16_474-3,ID=B16_489-1,ID=B16_499-1,ID=B16_451-3,ID=B16_474-1,ID=B16_484-4,ID=EL4PD1_119-1,ID=B16_499-2	NA	NA
Cacna2d3	chr14	28904943	29721864	-	24	11.5942	6.78e-10	2.32e-08	24 [13,11]	0 [0,0]	1	ID=B16_463-1,ID=B16_488-3,ID=B16_464-2,ID=B16_464-1,ID=B16_485-1,ID=B16_450-1,ID=B16_502-3,ID=B16_485-2,ID=B16_474-3,ID=B16_474-4,ID=B16_474-5,ID=B16_486-3,ID=EL4_55-2,ID=B16_450-3,ID=B16_449-3,ID=B16_499-1,ID=B16_451-5,ID=B16_462-4,ID=B16PD1_160-2,ID=EL4_62-1,ID=B16_484-2,ID=B16_499-2,ID=EL4_61-2,ID=B16_491-3	NA	NA
Trpm3	chr19	22139119	22989882	+	34	16.4251	7.41e-10	2.53e-08	34 [17,17]	0 [0,0]	1	ID=B16_463-1,ID=EL4_28_1,ID=EL4_28_2,ID=B16_488-3,ID=B16_464-2,ID=B16_464-1,ID=B16_485-1,ID=B16_485-3,ID=B16_502-3,ID=EL4_45-1,ID=EL4PD1_104-1,ID=B16PD1_537_4,ID=B16_474-3,ID=B16_474-4,ID=B16_497-1,ID=EL4_19_2,ID=B16_486-3,ID=EL4PD1_150-2,ID=B16_485-4,ID=B16_489-1,ID=B16_450-3,ID=B16_449-3,ID=B16_449-4,ID=B16_499-1,ID=EL4_24_1,ID=B16_451-5,ID=LLC_169-2,ID=B16_462-4,ID=EL4_65-1,ID=EL4_62-1,ID=B16_…	NA	NA
Sema6d	chr2	124089969	124667769	+	13	6.28019	7.76e-10	2.64e-08	13 [5,8]	0 [0,0]	1	ID=B16_488-3,ID=B16_464-1,ID=B16_502-3,ID=B16_474-3,ID=B16_474-4,ID=EL4_34_5,ID=B16_486-3,ID=B16_489-1,ID=B16_450-3,ID=B16_499-1,ID=EL4PD1_118-1,ID=B16_499-2,ID=B16_491-2	NA	NA
Dlgap1	chr17	69969073	70821413	+	31	14.9758	8.05e-10	2.73e-08	31 [13,18]	0 [0,0]	1	ID=B16_463-1,ID=B16_488-3,ID=B16_464-2,ID=B16_464-1,ID=B16_485-1,ID=B16_487-4,ID=EL4_68-1,ID=B16_498-1,ID=B16_502-1,ID=B16_460-1,ID=B16_474-3,ID=B16_474-4,ID=B16_497-1,ID=EL4_34_5,ID=EL4_59-1,ID=EL4PD1_119-4,ID=EL4_64-1,ID=B16_454-3,ID=B16_489-1,ID=B16_499-1,ID=B16_451-5,ID=B16_451-3,ID=B16_462-4,ID=EL4_65-1,ID=EL4_62-1,ID=B16_474-1,ID=B16_484-1,ID=B16_499-2,ID=EL4_61-2,ID=B16_491-3,ID=B16_491-2	NA	NA
Slc7a11	chr3	49892526	50443614	-	15	7.24638	8.4e-10	2.83e-08	15 [8,7]	0 [0,0]	1	ID=B16_463-1,ID=B16_488-3,ID=EL4_63-1,ID=B16_464-1,ID=LLC_173-3,ID=B16_502-3,ID=EL4_32_1,ID=EL4_52-5,ID=EL4PD1_157-1,ID=B16_489-1,ID=B16_449-4,ID=B16_499-1,ID=B16_462-4,ID=B16_474-1,ID=B16_499-2	NA	NA
Ppt1	chr4	122836250	122859175	+	11	5.31401	9.06e-10	3.04e-08	11 [5,6]	0 [0,0]	0.956694	ID=B16_464-2,ID=B16_485-3,ID=B16_460-1,ID=B16_474-3,ID=B16_485-4,ID=EL4_64-1,ID=B16_489-1,ID=B16_462-4,ID=B16_474-1,ID=B16_484-2,ID=B16_499-2	NA	NA
Aff2	chrX	69360294	69868037	+	15	7.24638	9.23e-10	3.08e-08	15 [9,6]	0 [0,0]	0.944465	ID=B16_464-2,ID=B16_460-1,ID=EL4_45-1,ID=B16PD1_533_1,ID=B16PD1_533_3,ID=B16PD1_161-4,ID=B16_474-3,ID=B16PD1_531_1,ID=EL4_36_4,ID=B16_522-1,ID=B16_462-4,ID=B16_469-1,ID=EL4_62-1,ID=EL4_29_2,ID=B16_491-3	NA	NA
Plcb1	chr2	134786067	135475247	+	23	11.1111	1.05e-09	3.49e-08	23 [13,10]	0 [0,0]	0.997891	ID=B16_463-1,ID=B16_455-1,ID=EL4_60-2,ID=B16_488-3,ID=B16_464-2,ID=B16_464-1,ID=B16_487-4,ID=B16_498-2,ID=B16_460-1,ID=B16_485-2,ID=B16_474-3,ID=B16_474-4,ID=B16_474-5,ID=EL4_52-5,ID=B16_489-1,ID=B16_499-1,ID=B16_451-3,ID=B16_462-4,ID=EL4_62-1,ID=B16_484-4,ID=B16_484-1,ID=EL4PD1_117-3,ID=B16_484-2	NA	NA
Atrnl1	chr19	57611034	58133338	+	9	4.34783	1.11e-09	3.65e-08	9 [8,1]	0 [0,0]	1	ID=B16_3-4,ID=B16_485-1,ID=B16_460-1,ID=B16_497-1,ID=B16_497-2,ID=B16_486-3,ID=B16_499-1,ID=B16_499-2,ID=B16_491-3	NA	NA
AI593442	chr9	52673042	52679780	-	7	3.38164	1.11e-09	3.65e-08	4 [0,4]	3 [3,0]	1	ID=B16_485-3,ID=B16_498-1,ID=B16_502-1,ID=B16_497-2,ID=B16_485-4,ID=B16_474-1,ID=B16_499-2	NA	NA
Pard3b	chr1	61638824	62642284	+	53	25.6039	1.11e-09	3.66e-08	53 [27,26]	0 [0,0]	0.995497	ID=EL4_41-1,ID=B16_463-1,ID=B16_488-3,ID=EL4_26_4,ID=B16_464-2,ID=B16_464-1,ID=B16_485-1,ID=B16_487-4,ID=B16_487-2,ID=B16_450-1,ID=B16_498-2,ID=B16_498-1,ID=B16_502-3,ID=B16_502-1,ID=B16_460-1,ID=EL4_45-1,ID=EL4_37_2,ID=B16PD1_537_4,ID=B16PD1_537_2,ID=B16PD1_161-4,ID=B16_474-3,ID=B16_474-5,ID=B16_497-1,ID=EL4_59-1,ID=B16_486-3,ID=EL4PD1_115-2,ID=EL4_55-2,ID=B16_485-4,ID=EL4PD1_154-1,ID=EL4_67-2,I…	NA	NA
Mpdz	chr4	81278500	81442805	-	39	18.8406	1.15e-09	3.73e-08	39 [17,22]	0 [0,0]	0.997716	ID=EL4PD1_116-2,ID=B16_463-1,ID=EL4_28_4,ID=B16_488-3,ID=EL4_26_4,ID=B16_464-2,ID=LLC_173-3,ID=EL4_68-1,ID=B16_450-1,ID=B16_502-3,ID=B16_502-1,ID=B16_460-1,ID=EL4_32_1,ID=B16PD1_537_2,ID=B16_485-2,ID=B16_474-3,ID=B16_474-4,ID=B16_474-5,ID=B16_497-1,ID=B16_497-2,ID=EL4_27_3,ID=EL4_48-4,ID=B16_486-3,ID=EL4PD1_115-3,ID=EL4PD1_150-2,ID=B16_485-4,ID=EL4_67-3,ID=B16_489-1,ID=B16_450-3,ID=B16_449-3,ID=B…	NA	NA
Egfem1	chr3	29082733	29691209	+	19	9.17874	1.14e-09	3.73e-08	19 [12,7]	0 [0,0]	1	ID=B16_463-1,ID=B16_488-3,ID=B16_464-2,ID=B16_464-1,ID=B16_487-4,ID=EL4_18_2,ID=B16_502-3,ID=B16_12-3,ID=B16_474-4,ID=EL4_32_3,ID=EL4PD1_114-1,ID=B16_486-3,ID=B16_489-1,ID=B16_499-1,ID=B16_451-5,ID=B16_475-2,ID=B16_474-1,ID=B16_491-3,ID=LLC_167-1	NA	NA
Trp53inp1	chr4	11156431	11174379	+	11	5.31401	1.14e-09	3.73e-08	10 [3,7]	1 [0,1]	1	ID=B16_502-3,ID=B16_460-1,ID=B16_485-2,ID=B16_474-4,ID=B16_499-1,ID=B16_451-5,ID=B16_451-3,ID=B16_475-1,ID=EL4_61-2,ID=B16_491-3,ID=B16_491-2	NA	NA
Sp140	chr1	85600703	85645037	+	15	7.24638	1.41e-09	4.5e-08	15 [12,3]	0 [0,0]	0.983061	ID=EL4PD1_116-2,ID=B16_464-1,ID=LLC_171-2,ID=EL4_45-1,ID=EL4_34_5,ID=EL4_59-1,ID=EL4PD1_113-1,ID=EL4PD1_150-2,ID=EL4_67-1,ID=EL4_67-2,ID=EL4_64-5,ID=EL4_64-2,ID=EL4_25_3,ID=EL4_65-1,ID=B16_491-3	NA	NA
Hpse2	chr19	42788947	43388311	-	17	8.21256	1.5e-09	4.79e-08	17 [12,5]	0 [0,0]	1	ID=B16_463-1,ID=B16_488-3,ID=B16_464-2,ID=B16_464-1,ID=B16_487-4,ID=B16_498-1,ID=EL4_45-1,ID=B16_474-3,ID=B16_497-1,ID=EL4_36_3,ID=B16_489-1,ID=B16_522-2,ID=B16_451-5,ID=B16_462-4,ID=B16_484-1,ID=B16_491-3,ID=B16_474-2	NA	NA
Grem2	chr1	174833785	174921819	-	25	12.0773	1.75e-09	5.57e-08	25 [11,14]	0 [1,-1]	0.973782	ID=B16_463-1,ID=B16_3-4,ID=B16_488-3,ID=B16_464-2,ID=B16_464-1,ID=B16_487-4,ID=B16_487-2,ID=LLC_173-3,ID=B16_450-1,ID=B16_498-1,ID=LLC_172-2,ID=EL4_70-1,ID=B16_16-2,ID=B16_474-4,ID=B16_497-1,ID=EL4_48-4,ID=EL4PD1_119-4,ID=EL4_64-5,ID=EL4PD1_157-2,ID=B16_1-2,ID=B16_489-1,ID=B16_499-1,ID=B16_462-4,ID=EL4_65-1,ID=B16_17-1	NA	NA
Zfp979	chr4	147611937	147642513	-	14	6.76329	1.98e-09	6.29e-08	14 [5,9]	0 [-1,1]	1	ID=B16PD1_534_3,ID=B16_488-3,ID=B16_464-2,ID=B16PD1_533_2,ID=B16_474-3,ID=EL4_33_2,ID=EL4_32_2,ID=B16_489-1,ID=EL4PD1_118-2,ID=EL4_62-1,ID=B16_484-4,ID=EL4_72-3,ID=EL4_54-2,ID=B16_491-3	NA	NA
Dopey1	chr9	86467154	86555923	+	27	13.0435	2.15e-09	6.8e-08	25 [16,9]	2 [0,2]	0.983559	ID=B16_464-2,ID=B16_464-1,ID=B16_460-1,ID=EL4_32_1,ID=B16_485-2,ID=B16_474-3,ID=B16_474-4,ID=B16_474-5,ID=B16_497-1,ID=B16_485-4,ID=EL4PD1_119-4,ID=EL4_25_3,ID=EL4PD1_157-2,ID=B16_489-1,ID=B16_522-2,ID=B16_450-3,ID=B16_499-1,ID=B16_451-5,ID=B16_451-3,ID=B16_462-4,ID=EL4_62-1,ID=B16_484-1,ID=B16_484-2,ID=EL4_72-3,ID=B16_499-2,ID=EL4_61-2,ID=B16_491-3	NA	NA
Hsfy2	chr1	56636044	56637435	-	5	2.41546	2.35e-09	7.41e-08	3 [0,3]	2 [1,1]	1	ID=B16_464-2,ID=EL4PD1_149-4,ID=B16_474-3,ID=B16_499-1,ID=EL4_65-1	NA	NA
Olfr906	chr9	38487085	38491560	+	7	3.38164	2.46e-09	7.73e-08	2 [0,2]	5 [1,4]	1	ID=LLC_172-2,ID=B16_460-1,ID=B16_474-3,ID=B16_474-4,ID=B16_451-3,ID=EL4_62-1,ID=LLC_170-1	NA	NA
Mctp1	chr13	76384535	77031810	+	23	11.1111	2.65e-09	8.3e-08	23 [8,15]	0 [0,0]	1	ID=B16_463-1,ID=EL4_28_4,ID=B16_488-3,ID=B16_485-1,ID=B16_450-1,ID=B16_498-2,ID=B16_502-3,ID=B16_474-3,ID=B16_474-4,ID=EL4_32_2,ID=B16_485-4,ID=EL4_52-5,ID=B16_489-1,ID=B16_450-3,ID=B16_449-4,ID=B16_499-1,ID=EL4_24_1,ID=B16_462-4,ID=EL4_65-1,ID=EL4_62-1,ID=B16_484-1,ID=EL4_54-2,ID=B16_491-3	NA	NA
Gng10	chr4	59035088	59041903	+	6	2.89855	2.72e-09	8.48e-08	6 [1,5]	0 [0,0]	1	ID=B16_456-4,ID=B16_12-3,ID=B16_2-2,ID=B16_1-2,ID=B16_462-4,ID=B16_515-1	NA	NA
Sox6	chr7	115471344	116038744	-	15	7.24638	2.81e-09	8.74e-08	15 [7,8]	0 [0,0]	1	ID=B16_463-1,ID=B16_464-2,ID=B16_464-1,ID=B16_487-4,ID=B16_498-2,ID=B16_498-1,ID=B16_460-1,ID=B16_474-3,ID=B16_474-4,ID=B16_497-1,ID=EL4_34_5,ID=B16_485-4,ID=B16_450-3,ID=B16_474-1,ID=B16_491-3	NA	NA
Gabrg3	chr7	56716465	57387188	-	22	10.628	2.9e-09	8.97e-08	22 [11,11]	0 [0,0]	1	ID=EL4PD1_116-2,ID=B16_463-1,ID=B16_488-3,ID=B16_464-2,ID=B16_464-1,ID=B16_460-1,ID=B16_485-2,ID=B16_474-3,ID=B16_474-4,ID=B16_497-1,ID=EL4_33_2,ID=B16_485-4,ID=EL4_64-1,ID=EL4_38_3,ID=B16_489-1,ID=B16_450-3,ID=B16_499-1,ID=B16_451-5,ID=LLC_169-2,ID=B16_462-4,ID=B16_474-1,ID=B16_499-2	NA	NA
Cntn5	chr9	9660891	10904726	-	84	40.5797	2.94e-09	9.07e-08	84 [45,39]	0 [0,0]	0.990781	ID=EL4PD1_116-2,ID=B16_463-1,ID=B16PD1_534_2,ID=EL4_28_4,ID=B16_455-1,ID=EL4_28_1,ID=EL4_28_2,ID=EL4_60-2,ID=B16_488-3,ID=B16_464-2,ID=B16_464-1,ID=EL4_60-1,ID=B16_485-1,ID=B16_487-4,ID=B16_485-3,ID=B16_450-1,ID=B16_498-2,ID=B16_498-1,ID=EL4_18_2,ID=B16_502-3,ID=B16_502-1,ID=B16_460-1,ID=EL4_45-1,ID=B16PD1_533_2,ID=EL4_22_3,ID=B16PD1_537_2,ID=B16_485-2,ID=B16_16-2,ID=B16_474-3,ID=B16_474-4,ID=B16…	NA	NA
Gmds	chr13	31819579	32338740	-	14	6.76329	3.01e-09	9.26e-08	14 [5,9]	0 [0,0]	1	ID=B16_463-1,ID=B16_464-2,ID=B16_487-2,ID=B16_498-1,ID=B16_460-1,ID=B16_474-4,ID=EL4_34_5,ID=EL4PD1_115-3,ID=B16_489-1,ID=B16_449-4,ID=EL4_62-1,ID=B16_484-1,ID=B16_484-2,ID=EL4PD1_118-1	NA	NA
Olfr1341	chr4	118703523	118713438	+	7	3.38164	3.08e-09	9.44e-08	5 [1,4]	2 [0,2]	1	ID=B16_488-3,ID=B16_450-1,ID=B16_474-3,ID=B16_474-5,ID=B16_450-3,ID=B16_462-4,ID=B16_491-3	NA	NA
Erbb4	chr1	68032186	69108059	-	79	38.1643	3.87e-09	1.18e-07	79 [42,37]	0 [0,0]	0.989577	ID=EL4PD1_116-2,ID=EL4_41-1,ID=B16_463-1,ID=B16_488-3,ID=EL4_26_4,ID=B16_101NT-3,ID=B16_464-2,ID=B16_464-1,ID=B16_485-1,ID=B16_487-4,ID=B16_485-3,ID=B16_487-2,ID=B16_450-1,ID=B16_498-1,ID=LLC_171-2,ID=LLC_168-1,ID=LLC_172-2,ID=EL4_18_2,ID=EL4PD1_149-4,ID=B16_519-1,ID=B16_502-3,ID=B16_460-1,ID=EL4_70-1,ID=EL4_45-1,ID=EL4_46-2,ID=EL4PD1_104-1,ID=B16_12-3,ID=B16PD1_537_1,ID=B16_485-2,ID=B16PD1_161-4…	NA	NA
Tram2	chr1	20996299	21079229	-	20	9.66184	3.89e-09	1.18e-07	19 [8,11]	1 [1,0]	0.973314	ID=B16_463-1,ID=B16_488-3,ID=B16_101NT-3,ID=B16_464-1,ID=B16_485-1,ID=B16_487-4,ID=B16_487-2,ID=B16_498-2,ID=B16_498-1,ID=EL4_45-1,ID=B16_497-2,ID=B16_486-3,ID=B16_489-1,ID=B16_499-1,ID=B16_475-1,ID=B16_462-4,ID=EL4_65-1,ID=B16_499-2,ID=B16_491-3,ID=B16_491-2	NA	NA
Hmgb1-rs18	chr4	67518306	67518932	-	5	2.41546	4.26e-09	1.29e-07	0 [0,0]	5 [4,1]	1	ID=B16_464-2,ID=B16_485-1,ID=B16_474-3,ID=B16_489-1,ID=B16_462-4	NA	NA
Tlr4	chr4	66827613	66930284	+	28	13.5266	4.48e-09	1.35e-07	28 [16,12]	0 [0,0]	1	ID=B16_463-1,ID=B16PD1_534_3,ID=B16PD1_534_1,ID=B16_464-2,ID=B16_485-1,ID=B16_487-4,ID=B16_485-3,ID=B16_502-3,ID=B16_460-1,ID=B16_474-3,ID=B16_474-4,ID=B16_485-4,ID=B16PD1_531_1,ID=EL4_64-1,ID=B16_489-1,ID=B16_450-3,ID=B16_451-3,ID=B16_518-2,ID=B16_475-1,ID=B16_462-4,ID=EL4_62-1,ID=B16_474-1,ID=B16_484-4,ID=B16_484-2,ID=B16_524-1,ID=B16_499-2,ID=EL4_29_2,ID=B16_491-3	NA	NA
Sntg1	chr1	8361475	9299238	-	51	24.6377	5.08e-09	1.52e-07	51 [20,31]	0 [0,0]	0.995174	ID=B16_468-4,ID=B16_463-1,ID=EL4_28_4,ID=B16_488-3,ID=EL4_26_4,ID=B16_464-2,ID=B16_464-1,ID=B16_456-4,ID=EL4PD1_116-3,ID=B16_487-4,ID=B16_487-2,ID=EL4PD1_114-3,ID=LLC_173-3,ID=B16_498-1,ID=LLC_168-1,ID=EL4_18_2,ID=B16_502-3,ID=B16_460-1,ID=EL4_45-1,ID=EL4_22_3,ID=B16_474-3,ID=B16_474-4,ID=B16_497-1,ID=B16_486-3,ID=EL4_67-1,ID=EL4_67-2,ID=EL4_64-5,ID=EL4_36_3,ID=EL4_36_2,ID=EL4PD1_156-3,ID=EL4_38_…	NA	NA
Lmbrd1	chr1	24678926	24766301	+	25	12.0773	5.42e-09	1.61e-07	25 [9,16]	0 [0,0]	1	ID=B16_463-1,ID=B16_3-4,ID=EL4_28_4,ID=B16_455-2,ID=B16_455-1,ID=EL4_26_4,ID=B16_464-2,ID=B16_464-1,ID=B16_456-4,ID=B16_487-4,ID=B16_460-1,ID=EL4_32_1,ID=B16_12-3,ID=EL4PD1_113-2,ID=EL4PD1_157-2,ID=B16_1-2,ID=B16_489-1,ID=B16_499-1,ID=B16_13-1,ID=B16_451-5,ID=B16_462-4,ID=EL4_65-1,ID=B16_451-4,ID=B16_499-2,ID=B16_491-3	NA	NA
Nbea	chr3	55625195	56183701	-	18	8.69565	5.7e-09	1.69e-07	18 [10,8]	0 [0,0]	1	ID=B16_464-2,ID=B16_464-1,ID=B16_487-4,ID=B16_450-1,ID=B16_460-1,ID=EL4_46-2,ID=B16_474-4,ID=EL4_64-1,ID=EL4_36_3,ID=EL4_36_2,ID=B16_489-1,ID=B16_450-3,ID=B16_499-1,ID=B16_451-3,ID=B16_475-2,ID=B16_462-4,ID=B16PD1_160-3,ID=B16_474-1	NA	NA
Adgrv1	chr13	81095068	81633154	-	14	6.76329	5.83e-09	1.73e-07	14 [7,7]	0 [0,0]	1	ID=B16_463-1,ID=B16_464-2,ID=B16_464-1,ID=B16_460-1,ID=B16_474-3,ID=EL4PD1_113-2,ID=B16_485-4,ID=EL4_52-5,ID=B16_489-1,ID=EL4_47-1,ID=EL4_72-3,ID=B16_499-2,ID=EL4_61-2,ID=B16_491-3	NA	NA
Hdac9	chr12	34095877	34917095	-	39	18.8406	7.21e-09	2.12e-07	39 [30,9]	0 [0,0]	0.975198	ID=B16_463-1,ID=B16PD1_534_3,ID=B16PD1_534_2,ID=B16PD1_534_1,ID=EL4_28_4,ID=EL4_28_1,ID=EL4_28_2,ID=EL4_28_3,ID=B16_464-2,ID=B16_464-1,ID=B16_487-4,ID=B16_487-2,ID=B16_498-1,ID=B16_502-3,ID=EL4PD1_104-1,ID=EL4_37_2,ID=B16PD1_537_4,ID=B16_474-3,ID=B16_474-4,ID=B16_497-2,ID=EL4_27_3,ID=EL4_32_3,ID=EL4_55-2,ID=EL4_33_2,ID=B16PD1_531_1,ID=EL4_67-4,ID=B16PD1_532_2,ID=B16_489-1,ID=B16_449-4,ID=B16_499-…	NA	NA
Cyp2j9	chr4	96568429	96591578	-	12	5.7971	7.72e-09	2.26e-07	11 [7,4]	1 [0,1]	1	ID=B16_464-2,ID=EL4PD1_114-3,ID=B16_450-1,ID=B16_460-1,ID=B16_485-2,ID=B16_474-4,ID=B16_451-5,ID=B16_462-4,ID=B16_484-4,ID=B16_484-2,ID=B16_491-3,ID=B16_474-2	NA	NA
Ryr3	chr2	112631355	113217087	-	16	7.72947	7.76e-09	2.27e-07	16 [9,7]	0 [0,0]	0.99985	ID=B16_488-3,ID=B16_464-1,ID=B16_485-1,ID=B16_487-2,ID=B16_474-4,ID=B16_497-2,ID=EL4PD1_115-2,ID=EL4_67-2,ID=B16_489-1,ID=B16_499-1,ID=EL4_24_1,ID=B16_475-1,ID=EL4_65-1,ID=B16_474-1,ID=B16_484-2,ID=B16_491-3	NA	NA
AC034099.1	chr7	142371148	142382667	-	6	2.89855	9.71e-09	2.82e-07	6 [0,6]	0 [0,0]	1	ID=EL4PD1_156-2,ID=EL4PD1_153-3,ID=EL4PD1_154-1,ID=LLC_174-3,ID=EL4PD1_152-2,ID=EL4PD1_152-3	NA	NA
Wdr82	chr9	106170928	106191139	+	10	4.83092	1.07e-08	3.11e-07	8 [3,5]	2 [0,2]	0.900091	ID=EL4_60-2,ID=B16_464-1,ID=B16_498-2,ID=B16_498-1,ID=B16_474-4,ID=B16_489-1,ID=B16_450-3,ID=LLC_170-1,ID=EL4PD1_118-1,ID=B16_499-2	NA	NA
Zfp993	chr4	146610961	146658160	+	17	8.21256	1.1e-08	3.18e-07	14 [4,10]	3 [3,0]	1	ID=EL4_28_4,ID=B16_498-2,ID=B16PD1_533_3,ID=B16_16-2,ID=B16_474-3,ID=B16_474-4,ID=EL4_52-5,ID=EL4PD1_154-1,ID=EL4_67-3,ID=B16_522-2,ID=B16_522-1,ID=B16PD1_163-3,ID=EL4_62-1,ID=B16_484-2,ID=B16_499-2,ID=EL4PD1_152-1,ID=B16_491-2	NA	NA
Pdpn	chr4	143267431	143299564	-	11	5.31401	1.11e-08	3.18e-07	11 [7,4]	0 [0,0]	0.959527	ID=B16_101NT-3,ID=B16_485-1,ID=B16_487-2,ID=B16_498-2,ID=B16_474-4,ID=B16_497-2,ID=B16_485-4,ID=B16_450-3,ID=B16_462-4,ID=B16_499-2,ID=B16_491-2	NA	NA
Dach1	chr14	97786853	98169543	-	10	4.83092	1.13e-08	3.23e-07	9 [4,5]	1 [0,1]	1	ID=B16_464-2,ID=B16_485-1,ID=B16_502-1,ID=B16_474-3,ID=EL4_67-2,ID=EL4_64-1,ID=B16_451-5,ID=B16_462-4,ID=EL4PD1_152-1,ID=B16_474-2	NA	NA
Grid1	chr14	34819825	35583379	+	24	11.5942	1.26e-08	3.58e-07	24 [11,13]	0 [0,0]	1	ID=B16_463-1,ID=EL4_28_2,ID=B16_488-3,ID=EL4PD1_116-1,ID=B16_464-2,ID=B16_464-1,ID=B16_498-1,ID=B16PD1_537_4,ID=B16_474-3,ID=B16_474-4,ID=B16_474-5,ID=B16_486-3,ID=EL4PD1_153-3,ID=EL4_52-5,ID=B16PD1_531_2,ID=EL4_36_3,ID=B16_489-1,ID=B16_451-5,ID=B16_461-1,ID=LLC_174-1,ID=LLC_170-1,ID=B16_484-1,ID=EL4PD1_117-1,ID=B16_491-2	NA	NA
Thsd7b	chr1	129273344	130219278	+	51	24.6377	1.32e-08	3.72e-07	51 [32,19]	0 [0,0]	0.994775	ID=B16_463-1,ID=EL4_28_4,ID=B16_455-1,ID=B16_488-3,ID=EL4PD1_116-1,ID=B16_464-2,ID=B16_464-1,ID=B16_485-1,ID=B16_487-4,ID=B16_485-3,ID=B16_487-2,ID=B16_498-1,ID=EL4_18_2,ID=EL4PD1_149-4,ID=B16_502-3,ID=B16_452-1,ID=B16_460-1,ID=EL4_45-1,ID=B16PD1_537_1,ID=B16PD1_161-4,ID=B16_16-2,ID=B16_474-3,ID=B16_474-4,ID=B16_497-1,ID=B16_497-2,ID=EL4_34_5,ID=B16_486-3,ID=EL4PD1_115-2,ID=EL4_55-2,ID=EL4PD1_113…	NA	NA
Samd12	chr15	53461621	53902537	-	9	4.34783	1.34e-08	3.78e-07	9 [5,4]	0 [0,0]	0.938871	ID=B16_464-2,ID=B16_485-1,ID=B16_487-4,ID=B16_485-3,ID=B16_474-4,ID=EL4_19_2,ID=EL4_48-4,ID=B16_489-1,ID=B16_499-1	NA	NA
Olfr884	chr9	38046555	38050137	+	6	2.89855	1.34e-08	3.78e-07	4 [1,3]	2 [1,1]	1	ID=B16_488-3,ID=B16_464-2,ID=B16_460-1,ID=B16_474-3,ID=B16_489-1,ID=B16_451-3	NA	NA
Tmem125	chr4	118540941	118543728	-	4	1.93237	1.36e-08	3.8e-07	2 [0,2]	2 [2,0]	1	ID=B16_464-1,ID=B16_485-1,ID=B16_489-1,ID=B16_462-4	NA	NA
Lingo2	chr4	35707406	36951223	-	94	45.4106	1.47e-08	4.08e-07	94 [52,42]	0 [-1,1]	0.988633	ID=EL4PD1_116-2,ID=B16_463-1,ID=B16_3-4,ID=EL4_28_4,ID=EL4_28_1,ID=EL4_28_3,ID=B16_488-3,ID=EL4_26_4,ID=EL4_63-1,ID=B16_101NT-3,ID=B16_464-2,ID=B16_464-1,ID=EL4_60-1,ID=B16_456-4,ID=B16_485-1,ID=B16_485-3,ID=B16_487-2,ID=EL4PD1_114-3,ID=LLC_173-3,ID=B16_450-1,ID=B16_498-2,ID=B16_498-1,ID=EL4_18_2,ID=EL4PD1_149-4,ID=B16_519-3,ID=B16_502-3,ID=B16_502-1,ID=EL4_49-1,ID=B16_460-1,ID=EL4_32_1,ID=B16PD1…	NA	NA
AC068905.1	chr9	38189727	38190658	+	5	2.41546	1.47e-08	4.08e-07	0 [0,0]	5 [1,4]	0.959793	ID=B16_464-2,ID=B16_502-3,ID=B16_489-1,ID=B16_450-3,ID=B16_499-1	NA	NA
Olfr892-ps1	chr9	38189727	38190652	+	5	2.41546	1.47e-08	4.08e-07	0 [0,0]	5 [1,4]	0.959793	ID=B16_464-2,ID=B16_502-3,ID=B16_489-1,ID=B16_450-3,ID=B16_499-1	NA	NA
Alk	chr17	71869442	72603709	-	20	9.66184	1.63e-08	4.52e-07	20 [8,12]	0 [0,0]	1	ID=EL4_41-1,ID=B16_488-3,ID=B16_464-2,ID=B16_464-1,ID=B16_487-4,ID=B16_460-1,ID=EL4_22_3,ID=B16_474-3,ID=B16_474-4,ID=B16_474-5,ID=EL4_67-2,ID=EL4_43-2,ID=B16_489-1,ID=B16_499-1,ID=B16_451-5,ID=B16_462-4,ID=EL4_62-1,ID=B16_484-1,ID=EL4_54-2,ID=LLC_167-1	NA	NA
Zfpm2	chr15	40655042	41104592	+	13	6.28019	1.76e-08	4.86e-07	13 [9,4]	0 [0,0]	1	ID=B16_463-1,ID=B16_101NT-3,ID=B16_464-1,ID=B16_450-1,ID=B16_498-2,ID=B16PD1_537_1,ID=B16_474-3,ID=B16_474-4,ID=B16_489-1,ID=B16_462-4,ID=B16_474-1,ID=LLC_170-1,ID=B16_499-2	NA	NA
Inpp4b	chr8	81342562	82125036	+	37	17.8744	1.87e-08	5.13e-07	37 [20,17]	0 [0,0]	0.997437	ID=EL4_41-1,ID=B16_463-1,ID=B16_488-3,ID=B16_464-2,ID=B16_464-1,ID=EL4PD1_116-3,ID=B16_485-1,ID=B16_487-4,ID=B16_450-1,ID=B16_502-3,ID=B16_460-1,ID=B16_485-2,ID=B16_474-3,ID=B16_474-4,ID=EL4_48-4,ID=EL4_34_5,ID=EL4PD1_119-4,ID=EL4_64-1,ID=B16_454-3,ID=EL4_36_3,ID=EL4_38_3,ID=B16_489-1,ID=B16_450-3,ID=B16_449-4,ID=EL4_70-3,ID=B16_499-1,ID=B16_451-5,ID=B16_451-3,ID=B16_475-2,ID=B16_462-4,ID=B16_474…	NA	NA
AL603630.1	chr9	7723147	7723694	+	4	1.93237	1.89e-08	5.19e-07	0 [0,0]	4 [4,0]	1	ID=EL4_26_4,ID=B16PD1_537_2,ID=EL4_27_3,ID=EL4_25_3	NA	NA
Slit3	chr11	35121224	35708507	+	8	3.86473	1.95e-08	5.29e-07	8 [4,4]	0 [0,0]	1	ID=EL4PD1_116-2,ID=B16_464-2,ID=B16_498-1,ID=EL4_59-1,ID=B16_521-1,ID=B16_489-1,ID=EL4_62-1,ID=B16_491-3	NA	NA
Atp11c	chrX	60223290	60592698	-	6	2.89855	1.94e-08	5.29e-07	6 [2,4]	0 [0,0]	1	ID=B16_474-3,ID=B16_474-4,ID=B16_489-1,ID=EL4_47-1,ID=B16_474-1,ID=B16_484-1	NA	NA
Pappa	chr4	65124174	65357509	+	45	21.7391	2.11e-08	5.69e-07	45 [28,17]	0 [0,0]	0.994875	ID=B16_463-1,ID=B16_455-1,ID=EL4_28_2,ID=B16_488-3,ID=B16_464-2,ID=B16_485-1,ID=B16_487-4,ID=B16_487-2,ID=LLC_173-3,ID=B16_450-1,ID=B16_498-2,ID=EL4_18_2,ID=B16_502-3,ID=B16_460-1,ID=B16PD1_537_4,ID=B16_485-2,ID=B16_474-3,ID=B16_474-4,ID=B16_16-4,ID=B16_497-1,ID=EL4PD1_114-1,ID=B16_486-3,ID=EL4PD1_115-3,ID=B16_485-4,ID=EL4_64-1,ID=B16_489-1,ID=B16_450-3,ID=B16_449-4,ID=B16_499-1,ID=EL4_24_1,ID=B1…	NA	NA
Klhl1	chr14	96105259	96519102	-	12	5.7971	2.12e-08	5.71e-07	12 [8,4]	0 [-1,1]	1	ID=B16_463-1,ID=B16_488-3,ID=B16_464-1,ID=B16_498-1,ID=EL4_18_2,ID=B16_474-3,ID=B16_474-4,ID=EL4_55-2,ID=B16_489-1,ID=B16_499-1,ID=B16_462-4,ID=EL4_62-1	NA	NA
Dgkb	chr12	37880705	38634239	+	41	19.8068	2.15e-08	5.77e-07	41 [23,18]	0 [0,0]	1	ID=B16_463-1,ID=EL4_28_1,ID=EL4_28_3,ID=B16_488-3,ID=EL4_26_4,ID=B16_464-2,ID=B16_464-1,ID=EL4PD1_116-3,ID=B16_487-4,ID=B16_450-1,ID=B16_498-1,ID=B16_460-1,ID=B16PD1_537_2,ID=B16_474-3,ID=B16_474-4,ID=B16_497-1,ID=EL4PD1_115-2,ID=EL4_55-2,ID=EL4PD1_113-1,ID=B16_485-4,ID=EL4_52-5,ID=B16PD1_531_1,ID=EL4_39-4,ID=B16_521-1,ID=EL4_64-1,ID=EL4_36_3,ID=B16_2-2,ID=B16_489-1,ID=B16_450-3,ID=B16_499-1,ID=E…	NA	NA
Zfp292	chr4	34803113	34882960	-	23	11.1111	2.28e-08	6.09e-07	23 [12,11]	0 [0,0]	0.961686	ID=B16_463-1,ID=EL4_28_4,ID=EL4_28_1,ID=EL4_28_2,ID=EL4_26_4,ID=B16_464-2,ID=B16_498-2,ID=B16_498-1,ID=EL4_18_2,ID=B16_460-1,ID=B16PD1_537_4,ID=B16PD1_537_1,ID=B16PD1_537_2,ID=B16_474-3,ID=B16_474-4,ID=B16_497-1,ID=EL4_32_3,ID=B16_489-1,ID=B16_499-1,ID=B16_451-5,ID=B16_462-4,ID=EL4_29_2,ID=B16_491-3	NA	NA
Enox1	chr14	77156763	77721760	+	12	5.7971	2.33e-08	6.2e-07	12 [3,9]	0 [0,0]	1	ID=B16_464-2,ID=B16_464-1,ID=B16_502-3,ID=B16_460-1,ID=EL4_32_1,ID=B16PD1_537_1,ID=B16PD1_161-4,ID=B16_474-4,ID=B16_485-4,ID=EL4_67-3,ID=EL4_61-2,ID=B16_491-3	NA	NA
Zfp980	chr4	145670685	145704441	+	14	6.76329	2.46e-08	6.54e-07	13 [6,7]	1 [1,0]	0.940178	ID=B16_464-2,ID=EL4PD1_116-3,ID=B16_502-3,ID=EL4_22_3,ID=B16_485-2,ID=B16_474-3,ID=EL4PD1_157-1,ID=B16_489-1,ID=B16_499-1,ID=B16_462-4,ID=LLC_174-1,ID=B16_474-1,ID=B16_491-3,ID=EL4PD1_152-1	NA	NA
Clasp1	chr1	118389058	118609497	+	39	18.8406	2.52e-08	6.65e-07	39 [27,12]	0 [-1,1]	0.9599	ID=B16_463-1,ID=B16PD1_534_1,ID=B16_3-4,ID=B16_455-1,ID=B16_488-3,ID=B16_464-2,ID=B16_464-1,ID=B16_456-4,ID=B16_487-4,ID=B16_498-2,ID=B16_498-1,ID=B16_4-2,ID=B16_460-1,ID=B16_12-3,ID=EL4_37_2,ID=B16_16-2,ID=B16_16-1,ID=B16_474-4,ID=B16_16-4,ID=EL4PD1_115-3,ID=B16_525-2,ID=B16_454-3,ID=B16_2-2,ID=B16_1-2,ID=B16_1-1,ID=B16_450-3,ID=EL4_70-2,ID=B16_499-1,ID=B16_13-1,ID=B16_451-5,ID=B16_453-2,ID=B16_…	NA	NA
Tbc1d5	chr17	50733127	51179349	-	13	6.28019	2.52e-08	6.65e-07	13 [6,7]	0 [0,0]	1	ID=B16_463-1,ID=EL4_28_2,ID=EL4_68-1,ID=B16_474-3,ID=B16_474-4,ID=B16_497-1,ID=B16_462-4,ID=B16_474-1,ID=EL4_54-3,ID=B16_499-2,ID=B16_491-3,ID=B16_491-2,ID=B16_474-2	NA	NA
Unc5d	chr8	28646717	29219636	-	18	8.69565	2.58e-08	6.79e-07	18 [10,8]	0 [0,0]	1	ID=B16_463-1,ID=B16_3-4,ID=B16_488-3,ID=B16_464-1,ID=B16_485-3,ID=B16_487-2,ID=B16_450-1,ID=B16_498-1,ID=B16_460-1,ID=EL4_22_3,ID=B16_474-4,ID=B16_486-3,ID=EL4PD1_115-2,ID=B16_449-4,ID=B16_462-4,ID=B16_484-4,ID=B16_499-2,ID=B16_515-1	NA	NA
Mup20	chr4	62050234	62054158	-	6	2.89855	2.66e-08	6.98e-07	0 [0,0]	6 [2,4]	1	ID=B16_464-2,ID=B16_502-3,ID=B16_460-1,ID=B16_474-4,ID=B16_489-1,ID=B16_450-3	NA	NA
Ptprg	chr14	11553532	12242041	+	19	9.17874	2.69e-08	7.04e-07	19 [11,8]	0 [0,0]	1	ID=B16_463-1,ID=B16_488-3,ID=B16_464-2,ID=B16_464-1,ID=LLC_168-1,ID=B16_502-3,ID=B16_474-3,ID=B16_497-1,ID=EL4_32_3,ID=EL4_59-1,ID=B16_486-3,ID=EL4_67-2,ID=B16_489-1,ID=B16_450-3,ID=B16_499-1,ID=B16_462-4,ID=B16_17-1,ID=B16_484-2,ID=B16_499-2	NA	NA
Rab2a	chr4	8535644	8607778	+	22	10.628	2.77e-08	7.21e-07	22 [16,6]	0 [0,0]	0.999936	ID=B16_463-1,ID=EL4_63-1,ID=B16_464-2,ID=EL4PD1_116-3,ID=B16_485-1,ID=EL4PD1_114-3,ID=B16_460-1,ID=EL4_45-1,ID=B16_485-2,ID=B16_474-3,ID=B16_474-4,ID=B16_497-1,ID=B16_486-3,ID=EL4PD1_115-2,ID=B16_485-4,ID=B16_489-1,ID=B16_450-3,ID=B16_451-3,ID=B16_462-4,ID=EL4PD1_118-1,ID=EL4_61-2,ID=B16_491-3	NA	NA
Dlgap2	chr8	14095875	14847680	+	20	9.66184	3.03e-08	7.88e-07	20 [13,7]	0 [0,0]	0.966885	ID=B16_488-3,ID=B16_464-2,ID=B16_464-1,ID=B16_450-1,ID=B16_502-3,ID=B16_474-3,ID=B16_485-4,ID=B16_1-2,ID=B16_489-1,ID=B16_450-3,ID=B16_13-3,ID=B16_499-1,ID=B16_13-1,ID=B16_451-5,ID=B16_451-3,ID=B16_475-1,ID=B16_462-4,ID=EL4_62-1,ID=EL4PD1_152-3,ID=B16_491-3	NA	NA
Adgrb3	chr1	25067550	25829707	-	40	19.3237	3.18e-08	8.25e-07	40 [17,23]	0 [0,0]	0.999943	ID=B16_463-1,ID=B16_488-3,ID=B16_464-2,ID=B16_464-1,ID=EL4PD1_116-3,ID=B16_485-1,ID=B16_487-4,ID=B16_487-2,ID=B16_450-1,ID=B16_498-1,ID=EL4_18_2,ID=B16_502-3,ID=EL4_45-1,ID=B16PD1_533_1,ID=B16_16-2,ID=B16_474-3,ID=B16_474-4,ID=B16_497-1,ID=EL4PD1_113-2,ID=EL4_48-4,ID=B16_486-3,ID=EL4PD1_115-2,ID=EL4_67-2,ID=B16_521-2,ID=EL4_64-1,ID=B16PD1_532_1,ID=EL4_36_3,ID=B16_489-1,ID=B16_449-4,ID=B16_499-1,I…	NA	NA
Olfr1330	chr4	118888609	118899597	+	7	3.38164	3.31e-08	8.55e-07	6 [4,2]	1 [1,0]	1	ID=B16_464-2,ID=EL4_49-1,ID=B16_474-4,ID=EL4_27_3,ID=EL4_25_3,ID=B16_462-4,ID=B16_474-1	NA	NA
AC165249.2	chr12	79113720	79114024	+	4	1.93237	3.57e-08	9.18e-07	0 [0,0]	4 [4,0]	1	ID=B16_464-1,ID=EL4PD1_113-1,ID=EL4_67-2,ID=B16_489-1	NA	NA
Vmn2r-ps18	chr4	147126130	147126509	+	4	1.93237	3.57e-08	9.18e-07	1 [1,0]	3 [3,0]	1	ID=B16_464-2,ID=B16_502-3,ID=B16_474-4,ID=B16_484-2	NA	NA
Pate1	chr9	35685079	35687371	-	5	2.41546	3.92e-08	1e-06	0 [0,0]	5 [0,5]	1	ID=B16_452-1,ID=B16_460-1,ID=B16_474-4,ID=B16_449-3,ID=B16_449-4	NA	NA
AC158622.1	chr10	19101545	19102318	+	4	1.93237	4.04e-08	1.03e-06	0 [0,0]	4 [4,0]	0.981773	ID=B16_497-2,ID=B16_489-1,ID=B16_499-1,ID=B16_491-2	NA	NA
Cdk14	chr5	4803391	5380197	-	18	8.69565	5.11e-08	1.29e-06	18 [7,11]	0 [0,0]	1	ID=B16_464-2,ID=B16_450-1,ID=B16_474-4,ID=B16_474-5,ID=EL4PD1_115-3,ID=B16_485-4,ID=EL4_64-1,ID=B16_517-1,ID=B16_489-1,ID=B16_450-3,ID=B16_451-5,ID=B16_462-4,ID=EL4_62-1,ID=LLC_170-1,ID=B16_484-1,ID=EL4PD1_117-1,ID=B16_499-2,ID=B16_515-2	NA	NA
Lurap1l	chr4	80910646	80955628	+	16	7.72947	5.19e-08	1.3e-06	15 [7,8]	1 [2,-1]	1	ID=B16_464-2,ID=B16_502-3,ID=B16_460-1,ID=B16_474-3,ID=B16_474-4,ID=B16_497-1,ID=B16_450-3,ID=B16_522-1,ID=B16_451-5,ID=B16_451-3,ID=B16_462-4,ID=LLC_174-1,ID=B16_451-4,ID=B16_499-2,ID=B16_491-3,ID=B16_491-2	NA	NA
Pola1	chrX	93304767	93632155	-	5	2.41546	5.35e-08	1.34e-06	5 [3,2]	0 [0,0]	1	ID=B16_488-3,ID=EL4PD1_156-4,ID=B16_462-4,ID=LLC_174-1,ID=B16_499-2	NA	NA
Sv2b	chr7	75114894	75309262	-	37	17.8744	5.56e-08	1.38e-06	37 [34,3]	0 [0,0]	0.75328	ID=B16_468-4,ID=B16_463-1,ID=B16_455-1,ID=B16_464-2,ID=B16_464-1,ID=B16_485-1,ID=B16_487-4,ID=B16_485-3,ID=B16_487-2,ID=B16_450-1,ID=B16_460-1,ID=B16_485-2,ID=B16_474-3,ID=B16_474-4,ID=B16_497-1,ID=B16_486-3,ID=B16_525-2,ID=B16_525-1,ID=B16_521-2,ID=B16_521-1,ID=B16_454-3,ID=B16_450-3,ID=B16_449-3,ID=B16_449-4,ID=B16_522-1,ID=B16_451-5,ID=B16_451-3,ID=B16_518-2,ID=B16_518-1,ID=B16_475-2,ID=B16_46…	NA	NA
Pnisr	chr4	21847583	21876475	+	13	6.28019	5.53e-08	1.38e-06	11 [2,9]	2 [1,1]	1	ID=B16_464-2,ID=B16_485-3,ID=B16_487-2,ID=B16_450-1,ID=B16_502-3,ID=B16_460-1,ID=B16_474-3,ID=B16_474-4,ID=B16_485-4,ID=B16_489-1,ID=B16_475-2,ID=B16_462-4,ID=EL4PD1_152-2	NA	NA
Gpr63	chr4	24966407	25007300	+	15	7.24638	5.59e-08	1.39e-06	14 [6,8]	1 [0,1]	1	ID=B16_463-1,ID=B16_488-3,ID=B16_485-3,ID=B16_487-2,ID=B16_502-3,ID=B16_460-1,ID=B16_12-3,ID=B16_474-3,ID=B16_474-4,ID=EL4PD1_114-1,ID=B16_489-1,ID=B16_451-5,ID=B16_462-4,ID=B16PD1_163-3,ID=B16_484-1	NA	NA
Dnajb3	chr1	88204732	88205782	-	4	1.93237	5.77e-08	1.43e-06	0 [0,0]	4 [0,4]	1	ID=B16_463-1,ID=B16_519-3,ID=B16_502-3,ID=B16_462-4	NA	NA
Arfgap2	chr2	91264974	91276931	+	6	2.89855	5.92e-08	1.46e-06	2 [2,0]	4 [2,2]	1	ID=B16_463-1,ID=B16_452-1,ID=B16_16-1,ID=EL4PD1_157-3,ID=B16_518-1,ID=B16_524-2	NA	NA
Kdm4c	chr4	74242497	74405860	+	39	18.8406	6.55e-08	1.61e-06	39 [25,14]	0 [0,0]	0.993246	ID=B16_488-3,ID=B16_464-2,ID=EL4_60-1,ID=B16_485-1,ID=B16_485-3,ID=LLC_173-3,ID=B16_450-1,ID=B16_498-2,ID=B16_502-3,ID=B16_460-1,ID=B16PD1_533_1,ID=B16PD1_537_2,ID=B16_474-3,ID=B16_474-4,ID=B16_474-5,ID=B16_497-1,ID=B16_497-2,ID=EL4PD1_150-2,ID=B16_485-4,ID=EL4_64-1,ID=B16_489-1,ID=B16_450-3,ID=B16_499-1,ID=EL4_24_1,ID=B16_451-5,ID=EL4PD1_118-2,ID=B16_451-3,ID=B16_475-2,ID=B16_462-4,ID=LLC_174-3,…	NA	NA
Cct3-ps1	chr4	52900599	52902683	+	5	2.41546	6.99e-08	1.7e-06	2 [2,0]	3 [0,3]	1	ID=B16_464-2,ID=B16_450-1,ID=B16_485-4,ID=B16_499-1,ID=B16_491-2	NA	NA
Olfr886-ps1	chr9	38069587	38070748	+	5	2.41546	6.99e-08	1.7e-06	1 [1,0]	4 [1,3]	0.877394	ID=B16_485-3,ID=B16_487-2,ID=B16_474-3,ID=EL4_19_2,ID=B16_450-3	NA	NA
Ptprk	chr10	28074820	28597397	+	18	8.69565	7.24e-08	1.76e-06	18 [14,4]	0 [0,0]	1	ID=B16_464-1,ID=B16_485-3,ID=B16_460-1,ID=EL4_22_3,ID=B16_474-3,ID=B16_474-4,ID=EL4_32_3,ID=EL4_67-2,ID=EL4_64-1,ID=B16_450-3,ID=EL4_24_1,ID=B16_451-5,ID=B16_475-1,ID=B16PD1_163-1,ID=B16_474-1,ID=B16_484-1,ID=EL4_54-2,ID=B16_499-2	NA	NA
Ptbp3	chr4	59471868	59549364	-	24	11.5942	7.32e-08	1.77e-06	24 [13,11]	0 [0,0]	0.970477	ID=B16_463-1,ID=B16_488-3,ID=B16_464-2,ID=B16_464-1,ID=B16_450-1,ID=EL4_18_2,ID=B16_502-3,ID=B16PD1_533_2,ID=B16PD1_537_2,ID=B16_474-3,ID=B16_497-2,ID=EL4_33_2,ID=B16_485-4,ID=B16_489-1,ID=B16_450-3,ID=B16_451-5,ID=B16_451-3,ID=B16_475-1,ID=B16_462-4,ID=B16_474-1,ID=B16_484-1,ID=EL4_54-2,ID=B16_499-2,ID=B16_474-2	NA	NA
Cyp4a12a	chr4	115299046	115332815	+	13	6.28019	7.84e-08	1.88e-06	11 [3,8]	2 [2,0]	1	ID=B16_464-2,ID=B16_487-2,ID=B16_450-1,ID=B16_502-3,ID=B16_485-2,ID=B16_474-3,ID=B16_474-4,ID=EL4_52-5,ID=B16_489-1,ID=B16_450-3,ID=B16_462-4,ID=EL4_54-2,ID=B16_491-3	NA	NA
Kcnh7	chr2	62693414	63184278	-	19	9.17874	8.38e-08	2e-06	19 [8,11]	0 [0,0]	0.999645	ID=B16_463-1,ID=B16_488-3,ID=B16_464-2,ID=B16_464-1,ID=B16_487-4,ID=B16_485-3,ID=B16_487-2,ID=B16_450-1,ID=B16_502-3,ID=B16_474-3,ID=B16_474-4,ID=B16_497-1,ID=EL4_33_2,ID=B16_499-1,ID=B16_462-4,ID=B16_469-1,ID=B16_474-1,ID=B16_484-1,ID=B16_491-3	NA	NA
Tenm4	chr7	96171246	96908569	+	19	9.17874	8.38e-08	2e-06	19 [11,8]	0 [0,0]	0.967995	ID=B16_463-1,ID=B16_488-3,ID=EL4_63-1,ID=B16_464-1,ID=LLC_172-2,ID=EL4_22_3,ID=B16_474-3,ID=B16_474-4,ID=B16_474-5,ID=EL4_55-2,ID=B16_489-1,ID=B16_450-3,ID=B16_499-1,ID=B16_451-5,ID=LLC_169-2,ID=B16_518-1,ID=B16_462-4,ID=B16_499-2,ID=B16_474-2	NA	NA
Eda	chrX	99975606	100400762	+	12	5.7971	8.51e-08	2.03e-06	12 [5,7]	0 [0,0]	1	ID=B16_463-1,ID=B16_464-2,ID=B16_464-1,ID=B16_502-3,ID=B16_502-1,ID=B16PD1_533_2,ID=B16_474-3,ID=B16_474-4,ID=EL4_36_3,ID=B16_518-1,ID=B16_484-2,ID=B16_499-2	NA	NA
B3gat1	chr9	26733824	26763095	+	10	4.83092	8.58e-08	2.04e-06	9 [3,6]	1 [1,0]	1	ID=B16_488-3,ID=B16_464-2,ID=B16_498-2,ID=B16_502-1,ID=B16_497-1,ID=EL4_59-1,ID=B16_451-3,ID=B16_474-1,ID=B16_499-2,ID=B16_491-3	NA	NA
Prss35	chr9	86743649	86758443	+	8	3.86473	9.06e-08	2.15e-06	4 [0,4]	4 [1,3]	1	ID=B16_463-1,ID=B16_464-1,ID=B16_502-3,ID=B16_460-1,ID=B16_474-4,ID=B16_450-3,ID=B16_462-4,ID=B16_484-2	NA	NA
Skint3	chr4	112232245	112300468	+	22	10.628	9.72e-08	2.29e-06	21 [13,8]	1 [-2,3]	0.971496	ID=EL4_28_4,ID=EL4_28_3,ID=B16_464-2,ID=B16_487-4,ID=B16_450-1,ID=B16_460-1,ID=B16_474-3,ID=B16_474-4,ID=EL4PD1_113-1,ID=B16_485-4,ID=B16_521-1,ID=EL4_64-1,ID=B16_489-1,ID=B16_450-3,ID=B16_451-5,ID=EL4PD1_118-2,ID=B16_475-1,ID=B16_475-2,ID=LLC_174-1,ID=B16_484-4,ID=B16_499-2,ID=B16_491-3	NA	NA
Fam83b	chr9	76490054	76567116	-	22	10.628	1.1e-07	2.59e-06	22 [12,10]	0 [1,-1]	1	ID=EL4PD1_116-1,ID=B16_464-2,ID=B16_485-1,ID=B16_450-1,ID=B16_502-3,ID=B16_460-1,ID=B16_474-3,ID=B16_474-4,ID=B16_486-3,ID=B16_485-4,ID=EL4_64-1,ID=EL4_25_3,ID=B16_450-3,ID=B16_451-3,ID=B16_462-4,ID=EL4_47-1,ID=LLC_170-1,ID=EL4_54-4,ID=EL4_54-2,ID=B16_499-2,ID=EL4_61-2,ID=B16_491-3	NA	NA
Ank2	chr3	126959007	127499350	-	15	7.24638	1.11e-07	2.61e-06	15 [7,8]	0 [0,0]	1	ID=B16_463-1,ID=B16_464-1,ID=EL4_68-1,ID=B16_502-3,ID=B16_460-1,ID=EL4_22_3,ID=EL4PD1_104-1,ID=B16_474-3,ID=B16_474-4,ID=EL4_19_2,ID=B16_489-1,ID=B16_499-1,ID=B16_474-1,ID=EL4_72-3,ID=EL4_54-2	NA	NA
Iqcf5	chr9	106514573	106516010	+	4	1.93237	1.14e-07	2.64e-06	0 [0,0]	4 [4,0]	1	ID=B16_485-3,ID=B16_474-5,ID=B16_485-4,ID=B16_474-2	NA	NA
Luzp2	chr7	54835615	55268885	+	13	6.28019	1.21e-07	2.79e-06	13 [7,6]	0 [0,0]	1	ID=EL4PD1_116-2,ID=B16_464-2,ID=B16_464-1,ID=B16_487-2,ID=B16_474-4,ID=B16_497-1,ID=EL4_67-2,ID=EL4_64-5,ID=B16_499-1,ID=B16_462-4,ID=EL4_62-1,ID=B16_484-4,ID=B16_499-2	NA	NA
Cntn6	chr6	104492922	104863406	+	10	4.83092	1.21e-07	2.8e-06	9 [6,3]	1 [1,0]	1	ID=B16_463-1,ID=EL4_28_3,ID=B16_487-2,ID=B16_498-2,ID=B16_474-3,ID=B16_474-4,ID=B16_489-1,ID=B16_451-5,ID=B16_462-4,ID=B16_491-3	NA	NA
Ctsd	chr7	142375911	142388038	-	6	2.89855	1.32e-07	3.03e-06	6 [0,6]	0 [0,0]	1	ID=EL4PD1_156-2,ID=EL4PD1_153-3,ID=EL4PD1_154-1,ID=LLC_174-3,ID=EL4PD1_152-2,ID=EL4PD1_152-3	NA	NA
Pacsin3	chr2	91256162	91264679	+	5	2.41546	1.35e-07	3.1e-06	5 [2,3]	0 [0,0]	1	ID=B16_463-1,ID=B16_452-1,ID=B16_16-1,ID=EL4PD1_157-3,ID=B16_518-1	NA	NA
Orc3	chr4	34570796	34614944	-	16	7.72947	1.57e-07	3.57e-06	13 [8,5]	3 [2,1]	1	ID=EL4_28_3,ID=B16_485-1,ID=B16PD1_537_1,ID=B16_474-3,ID=B16_474-4,ID=B16_497-1,ID=EL4_19_2,ID=EL4_27_3,ID=EL4_32_2,ID=B16_450-3,ID=B16_451-5,ID=B16_462-4,ID=B16_484-4,ID=EL4_72-3,ID=B16_499-2,ID=B16_491-3	NA	NA
Msl2	chr9	101074762	101104800	+	11	5.31401	1.6e-07	3.64e-06	10 [4,6]	1 [1,0]	0.999506	ID=EL4PD1_116-2,ID=B16_488-3,ID=B16_487-4,ID=EL4PD1_114-3,ID=B16_498-1,ID=B16_486-3,ID=EL4PD1_154-1,ID=EL4_64-1,ID=B16_489-1,ID=B16_491-3,ID=EL4PD1_152-1	NA	NA
Stpg2	chr3	139205893	139710299	+	18	8.69565	1.63e-07	3.69e-06	18 [7,11]	0 [0,0]	1	ID=B16_464-2,ID=B16_464-1,ID=B16_487-2,ID=B16_460-1,ID=B16_485-2,ID=B16_474-4,ID=B16_486-3,ID=EL4_55-2,ID=EL4_36_4,ID=EL4PD1_157-2,ID=B16_489-1,ID=B16_451-3,ID=B16_462-4,ID=B16PD1_160-3,ID=EL4_47-1,ID=EL4_62-1,ID=EL4PD1_117-1,ID=B16_491-3	NA	NA
Bcas3	chr11	85353167	85826058	+	9	4.34783	1.64e-07	3.7e-06	9 [6,3]	0 [0,0]	1	ID=B16_464-2,ID=B16_485-1,ID=B16_474-3,ID=B16_497-2,ID=B16_450-3,ID=B16_449-4,ID=EL4_70-2,ID=B16_462-4,ID=EL4_62-1	NA	NA
Prkdc	chr16	15637889	15842235	+	42	20.2899	1.64e-07	3.71e-06	42 [40,2]	0 [0,0]	0.702237	ID=B16_468-4,ID=B16_463-1,ID=B16_455-2,ID=B16_464-2,ID=B16_464-1,ID=B16_456-4,ID=B16_485-1,ID=B16_487-4,ID=B16_485-3,ID=B16_487-2,ID=B16_450-1,ID=B16_498-1,ID=B16_452-1,ID=B16_460-1,ID=B16_485-2,ID=B16_474-3,ID=B16_474-4,ID=B16_486-3,ID=B16_525-2,ID=B16_525-1,ID=B16_485-4,ID=B16_521-2,ID=EL4_64-1,ID=B16_454-3,ID=B16_449-3,ID=B16_449-4,ID=B16_522-1,ID=B16_499-1,ID=B16_451-5,ID=B16_453-2,ID=B16_518…	NA	NA
Olfr829	chr9	18854933	18859080	+	6	2.89855	1.69e-07	3.81e-06	5 [4,1]	1 [1,0]	1	ID=B16_463-1,ID=EL4_60-2,ID=EL4_48-4,ID=EL4_59-1,ID=B16PD1_163-3,ID=EL4_54-2	NA	NA
Kcnab2	chr4	152390744	152477871	-	15	7.24638	1.77e-07	3.98e-06	15 [7,8]	0 [0,0]	1	ID=B16_464-2,ID=EL4PD1_149-4,ID=B16_519-3,ID=B16_502-1,ID=B16_460-1,ID=B16_474-3,ID=B16_474-4,ID=B16_489-1,ID=B16_451-3,ID=LLC_174-3,ID=LLC_174-2,ID=EL4_62-1,ID=B16_524-1,ID=B16_491-3,ID=EL4PD1_152-1	NA	NA
Csmd2	chr4	127988044	128567656	+	65	31.401	1.81e-07	4.05e-06	65 [29,36]	0 [0,0]	0.947193	ID=B16_463-1,ID=B16_455-2,ID=B16_455-1,ID=B16_488-3,ID=EL4_63-1,ID=B16_464-2,ID=B16_464-1,ID=EL4_60-1,ID=B16_456-4,ID=B16_485-1,ID=B16_485-3,ID=B16_487-2,ID=B16_450-1,ID=B16_498-2,ID=B16_498-1,ID=EL4_18_2,ID=B16_519-1,ID=B16_502-3,ID=B16_502-1,ID=EL4_49-1,ID=B16_460-1,ID=B16_474-3,ID=B16_474-4,ID=B16_474-5,ID=B16_497-1,ID=EL4PD1_114-1,ID=EL4_59-1,ID=B16_486-3,ID=EL4PD1_115-3,ID=B16_525-2,ID=B16_5…	NA	NA
Kcnma1	chr14	23299395	24004859	-	21	10.1449	1.83e-07	4.08e-06	21 [13,8]	0 [0,0]	1	ID=EL4PD1_116-2,ID=EL4_41-1,ID=B16_463-1,ID=B16_464-2,ID=B16_464-1,ID=B16_474-3,ID=B16_497-1,ID=EL4_55-2,ID=B16_525-2,ID=B16_485-4,ID=B16_489-1,ID=B16_499-1,ID=B16_451-5,ID=EL4PD1_118-2,ID=B16_451-3,ID=B16_462-4,ID=B16_524-2,ID=B16_451-4,ID=B16_499-2,ID=B16_515-1,ID=B16_491-3	NA	NA
Phf3	chr1	30802339	30873581	-	21	10.1449	1.84e-07	4.08e-06	21 [10,11]	0 [0,0]	1	ID=EL4_41-1,ID=B16_463-1,ID=EL4_28_2,ID=EL4_28_3,ID=B16_488-3,ID=B16_101NT-3,ID=B16_464-1,ID=B16_487-4,ID=B16_502-3,ID=EL4_32_1,ID=EL4_45-1,ID=B16_474-4,ID=B16_486-3,ID=EL4_67-2,ID=B16_489-1,ID=B16_450-3,ID=B16_449-3,ID=B16_499-1,ID=B16_475-2,ID=B16_462-4,ID=B16_520-1	NA	NA
Olfr58	chr9	19780283	19785333	+	7	3.38164	2.04e-07	4.52e-06	5 [2,3]	2 [2,0]	1	ID=B16_485-1,ID=B16_450-1,ID=B16_474-3,ID=B16_474-5,ID=B16_497-1,ID=B16_485-4,ID=B16_491-3	NA	NA
Grip1	chr10	119453830	120087260	+	19	9.17874	2.09e-07	4.63e-06	19 [5,14]	0 [0,0]	0.969873	ID=EL4PD1_116-2,ID=B16_463-1,ID=B16_455-1,ID=EL4_26_4,ID=EL4_63-1,ID=B16_487-2,ID=B16_474-3,ID=B16_474-4,ID=B16_497-1,ID=B16_486-3,ID=EL4_64-1,ID=EL4PD1_157-1,ID=B16_489-1,ID=B16_450-3,ID=B16_462-4,ID=B16_484-4,ID=B16_451-4,ID=EL4_54-2,ID=B16_491-3	NA	NA
Ifna12	chr4	88602580	88603376	-	4	1.93237	2.25e-07	4.94e-06	0 [0,0]	4 [2,2]	0.986406	ID=B16_464-2,ID=B16_485-3,ID=B16_499-2,ID=B16_491-3	NA	NA
Ccdc50-ps	chr4	100567108	100568048	-	4	1.93237	2.36e-07	5.19e-06	0 [0,0]	4 [3,1]	1	ID=B16_464-2,ID=B16_474-4,ID=B16_451-3,ID=B16_475-2	NA	NA
Ube2u	chr4	100478849	100550147	+	19	9.17874	2.38e-07	5.22e-06	18 [10,8]	1 [0,1]	1	ID=B16_488-3,ID=B16_464-2,ID=EL4_60-1,ID=B16_485-3,ID=B16_450-1,ID=B16_502-3,ID=B16_460-1,ID=B16_485-2,ID=B16_474-3,ID=B16_474-4,ID=B16_485-4,ID=EL4_64-1,ID=B16_489-1,ID=B16_475-1,ID=B16_462-4,ID=B16_474-1,ID=B16_484-1,ID=EL4_54-2,ID=B16_491-3	NA	NA
Diaph3	chr14	86655367	87141224	-	16	7.72947	2.6e-07	5.68e-06	15 [9,6]	1 [0,1]	1	ID=EL4_28_3,ID=B16_488-3,ID=B16_464-2,ID=B16_464-1,ID=B16_450-1,ID=B16_498-1,ID=B16_502-3,ID=B16_460-1,ID=B16_474-3,ID=B16_474-4,ID=B16_485-4,ID=B16_450-3,ID=B16_451-5,ID=EL4_62-1,ID=B16_474-1,ID=B16_499-2	NA	NA
Agbl4	chr4	110397698	111664324	+	85	41.0628	2.75e-07	5.99e-06	85 [41,44]	0 [0,0]	0.992322	ID=B16_463-1,ID=B16PD1_534_2,ID=EL4_60-2,ID=B16_488-3,ID=EL4PD1_116-1,ID=EL4_26_4,ID=EL4_63-1,ID=B16_464-2,ID=B16_464-1,ID=EL4PD1_116-3,ID=B16_485-1,ID=B16_487-4,ID=B16_485-3,ID=B16_487-2,ID=EL4PD1_114-3,ID=LLC_173-3,ID=B16_450-1,ID=B16_498-2,ID=B16_498-1,ID=B16_519-3,ID=B16_502-3,ID=B16_502-1,ID=EL4_49-1,ID=B16_460-1,ID=B16PD1_533_1,ID=B16_485-2,ID=B16_474-3,ID=B16_474-4,ID=B16_474-5,ID=B16_497-…	NA	NA
Ank3	chr10	69398996	70023957	+	17	8.21256	2.79e-07	6.06e-06	17 [8,9]	0 [0,0]	1	ID=B16_488-3,ID=B16_464-2,ID=B16_464-1,ID=B16_487-4,ID=B16_460-1,ID=B16PD1_537_4,ID=B16_474-3,ID=B16_474-4,ID=B16_497-1,ID=B16_486-3,ID=B16_485-4,ID=EL4_64-1,ID=B16_449-4,ID=B16_462-4,ID=EL4_65-1,ID=EL4_62-1,ID=B16_484-2	NA	NA
Grm1	chr10	10686059	11082356	-	9	4.34783	2.8e-07	6.06e-06	9 [5,4]	0 [0,0]	1	ID=B16_464-2,ID=B16_464-1,ID=B16_485-1,ID=B16_502-3,ID=B16_474-4,ID=EL4PD1_114-1,ID=B16_489-1,ID=B16_462-4,ID=B16_484-2	NA	NA
Cpa5	chr6	30611010	30631745	+	8	3.86473	2.91e-07	6.29e-06	0 [0,0]	8 [7,1]	0.963716	ID=EL4_28_2,ID=LLC_168-1,ID=EL4_32_1,ID=EL4_19_2,ID=EL4_27_3,ID=EL4_32_3,ID=EL4_32_2,ID=EL4_29_2	NA	NA
Fgf13	chrX	59062145	59568071	-	20	9.66184	3.1e-07	6.69e-06	20 [12,8]	0 [0,0]	1	ID=B16_463-1,ID=B16PD1_534_3,ID=B16_464-1,ID=B16_498-2,ID=B16_502-3,ID=B16_485-2,ID=B16_474-4,ID=EL4PD1_150-2,ID=B16_521-2,ID=EL4_36_3,ID=B16_489-1,ID=B16_449-4,ID=B16_499-1,ID=B16_451-5,ID=B16_462-4,ID=EL4_47-1,ID=LLC_170-1,ID=B16_484-1,ID=EL4_72-3,ID=B16_491-3	NA	NA
Chrm3	chr13	9875486	10360844	-	14	6.76329	3.14e-07	6.76e-06	14 [7,7]	0 [0,0]	1	ID=B16_468-4,ID=B16_463-1,ID=B16_464-2,ID=B16_464-1,ID=B16_485-1,ID=B16_460-1,ID=B16PD1_537_1,ID=B16_474-3,ID=B16_474-4,ID=B16_474-5,ID=B16_521-2,ID=B16_489-1,ID=B16_449-4,ID=B16_499-1	NA	NA
Ctrc	chr4	141814962	141846263	-	10	4.83092	3.34e-07	7.13e-06	10 [5,5]	0 [0,0]	1	ID=B16_464-1,ID=B16_502-3,ID=B16_460-1,ID=B16_474-3,ID=B16_474-4,ID=B16_474-5,ID=B16_486-3,ID=B16_449-4,ID=B16_462-4,ID=B16_474-1	NA	NA
1700080E11Rik	chr9	105143342	105145092	-	4	1.93237	3.33e-07	7.13e-06	0 [0,0]	4 [3,1]	1	ID=EL4_26_4,ID=EL4_18_2,ID=B16_474-3,ID=EL4_38_3	NA	NA
Speer5-ps1	chr10	44170447	44219583	+	15	7.24638	3.77e-07	8.04e-06	14 [1,13]	1 [0,1]	0.8929	ID=B16_455-2,ID=B16_464-2,ID=B16_487-4,ID=B16_502-3,ID=B16_16-1,ID=B16_474-5,ID=B16_16-4,ID=B16_525-2,ID=B16_1-2,ID=B16_13-3,ID=B16_451-3,ID=B16_462-4,ID=B16_17-3,ID=B16_484-1,ID=B16_484-2	NA	NA
Ophn1	chrX	98554277	98890985	-	6	2.89855	4.14e-07	8.81e-06	6 [1,5]	0 [0,0]	0.859603	ID=B16_463-1,ID=B16_450-1,ID=B16_485-4,ID=EL4_52-2,ID=LLC_170-1,ID=B16_491-3	NA	NA
Tex10	chr4	48430858	48473459	-	15	7.24638	4.27e-07	9.06e-06	15 [4,11]	0 [0,0]	1	ID=B16_488-3,ID=B16_464-2,ID=B16_487-4,ID=B16_498-2,ID=B16_460-1,ID=B16_474-4,ID=B16_497-1,ID=EL4PD1_115-3,ID=B16_489-1,ID=B16_450-3,ID=B16_449-4,ID=B16_451-5,ID=B16PD1_160-3,ID=B16_499-2,ID=B16_491-3	NA	NA
Ptprm	chr17	66666848	67354459	-	23	11.1111	4.43e-07	9.38e-06	22 [13,9]	1 [1,0]	1	ID=EL4_26_4,ID=B16_464-2,ID=B16_464-1,ID=B16_450-1,ID=EL4_18_2,ID=B16PD1_537_2,ID=B16_474-3,ID=B16_474-4,ID=B16_497-2,ID=EL4PD1_114-1,ID=EL4PD1_150-2,ID=EL4_64-5,ID=EL4_64-1,ID=EL4_25_3,ID=B16_489-1,ID=B16_499-1,ID=B16_462-4,ID=LLC_174-1,ID=B16_484-1,ID=B16_484-2,ID=EL4_54-2,ID=B16_499-2,ID=EL4PD1_152-3	NA	NA
Cacna1c	chr6	118587240	119196231	-	13	6.28019	4.49e-07	9.48e-06	13 [7,6]	0 [0,0]	0.951613	ID=B16_463-1,ID=B16_485-1,ID=LLC_173-3,ID=B16_498-2,ID=B16_502-3,ID=B16_474-4,ID=B16_486-3,ID=B16_489-1,ID=B16_499-1,ID=EL4PD1_118-2,ID=EL4_47-1,ID=EL4_61-2,ID=B16_491-3	NA	NA
Tenm3	chr8	48227682	48674690	-	10	4.83092	4.59e-07	9.67e-06	10 [3,7]	0 [0,0]	1	ID=B16_463-1,ID=B16_464-2,ID=B16_464-1,ID=B16_487-4,ID=B16_474-4,ID=B16_497-1,ID=B16_489-1,ID=B16_450-3,ID=B16_451-5,ID=B16_484-1	NA	NA
Vmn2r89	chr14	51451962	51461293	+	8	3.86473	4.81e-07	1.01e-05	7 [0,7]	1 [0,1]	0.963717	ID=EL4_28_2,ID=B16_460-1,ID=EL4_22_3,ID=EL4_27_3,ID=EL4_32_3,ID=EL4_25_3,ID=EL4_24_1,ID=EL4_29_2	NA	NA
Ptprn2	chr12	116485729	117276849	+	25	12.0773	5.45e-07	1.14e-05	25 [15,10]	0 [0,0]	0.983315	ID=B16_463-1,ID=B16_101NT-3,ID=B16_464-2,ID=B16_464-1,ID=B16_487-4,ID=B16_498-1,ID=B16_502-3,ID=B16_460-1,ID=EL4_45-1,ID=B16_474-4,ID=B16_497-1,ID=EL4_36_2,ID=B16_489-1,ID=B16_450-3,ID=B16_449-4,ID=B16_451-3,ID=B16_462-4,ID=B16PD1_163-1,ID=EL4_65-1,ID=B16PD1_160-3,ID=EL4PD1_117-1,ID=B16_499-2,ID=EL4PD1_152-3,ID=B16_491-3,ID=B16_474-2	NA	NA
Cdh12	chr15	21111452	21589533	+	21	10.1449	5.44e-07	1.14e-05	21 [10,11]	0 [0,0]	1	ID=EL4PD1_116-2,ID=B16_463-1,ID=B16_488-3,ID=B16_464-1,ID=EL4_60-1,ID=B16_450-1,ID=B16_498-1,ID=B16_460-1,ID=EL4_45-1,ID=B16_474-4,ID=B16_497-1,ID=B16_486-3,ID=EL4_67-2,ID=EL4_64-5,ID=B16_489-1,ID=B16_450-3,ID=B16_499-1,ID=B16_451-5,ID=B16_462-3,ID=LLC_174-1,ID=B16_491-3	NA	NA
Cldn34d	chrX	76582610	76602924	-	10	4.83092	5.44e-07	1.14e-05	10 [3,7]	0 [0,0]	1	ID=B16_488-3,ID=EL4_26_4,ID=B16_464-2,ID=EL4_49-1,ID=B16_460-1,ID=EL4_32_3,ID=EL4_36_2,ID=EL4PD1_157-2,ID=EL4_38_3,ID=EL4_65-1	NA	NA
Olfr937	chr9	39058851	39064951	-	7	3.38164	5.9e-07	1.23e-05	5 [4,1]	2 [1,1]	1	ID=B16_502-3,ID=B16_460-1,ID=B16_485-4,ID=B16_450-3,ID=B16_462-4,ID=B16_474-1,ID=B16_499-2	NA	NA
Tmco2	chr4	121105651	121109226	-	5	2.41546	5.96e-07	1.23e-05	2 [0,2]	3 [1,2]	1	ID=B16_464-2,ID=B16_464-1,ID=B16_502-3,ID=B16_485-2,ID=B16_485-4	NA	NA
Fras1	chr5	96373955	96784728	+	7	3.38164	6.23e-07	1.29e-05	7 [3,4]	0 [0,0]	1	ID=B16_463-1,ID=B16PD1_534_3,ID=B16_498-2,ID=B16_502-3,ID=B16_474-3,ID=B16_485-4,ID=B16_489-1	NA	NA
1700007B14Rik	chr8	75448694	75984478	+	22	10.628	6.81e-07	1.4e-05	21 [12,9]	1 [1,0]	0.999789	ID=B16_464-2,ID=B16_464-1,ID=B16_487-4,ID=B16_487-2,ID=B16_498-1,ID=B16_502-3,ID=B16_502-1,ID=EL4_49-1,ID=B16_460-1,ID=B16_474-3,ID=B16_474-4,ID=B16_474-5,ID=B16_486-3,ID=EL4_67-2,ID=B16_2-2,ID=B16_489-1,ID=B16_451-3,ID=B16_475-2,ID=B16_462-4,ID=B16_484-2,ID=B16_499-2,ID=B16_491-2	NA	NA
Gpc3	chrX	52272426	52613921	-	6	2.89855	6.8e-07	1.4e-05	6 [3,3]	0 [0,0]	1	ID=B16_464-1,ID=EL4_55-2,ID=B16_499-1,ID=B16_462-4,ID=EL4_62-1,ID=B16_474-1	NA	NA
Pstpip1	chr9	56089962	56128888	+	10	4.83092	6.89e-07	1.41e-05	10 [5,5]	0 [0,0]	1	ID=B16_488-3,ID=B16_485-3,ID=B16_487-2,ID=B16_498-2,ID=B16_498-1,ID=B16_489-1,ID=B16_450-3,ID=B16_451-3,ID=EL4_62-1,ID=B16_499-2	NA	NA
Slc25a21	chr12	56712634	57197472	-	16	7.72947	7.5e-07	1.53e-05	16 [9,7]	0 [0,0]	1	ID=EL4_41-1,ID=B16_463-1,ID=EL4_28_4,ID=B16_488-3,ID=B16_101NT-3,ID=EL4_60-1,ID=B16_498-1,ID=B16_474-3,ID=B16_474-4,ID=EL4_34_5,ID=EL4_55-2,ID=B16_449-4,ID=B16_499-1,ID=B16_462-4,ID=B16_474-1,ID=B16_491-3	NA	NA
Foxp2	chr6	14901349	15441977	+	27	13.0435	8.69e-07	1.76e-05	27 [11,16]	0 [0,0]	0.999899	ID=B16_463-1,ID=B16_101NT-3,ID=B16_464-2,ID=B16_464-1,ID=B16_485-3,ID=B16_487-2,ID=B16_450-1,ID=B16_498-1,ID=B16_460-1,ID=EL4_22_3,ID=B16_485-2,ID=B16_474-3,ID=B16_474-4,ID=B16_497-2,ID=EL4PD1_113-1,ID=B16_521-2,ID=B16_521-1,ID=B16_450-3,ID=B16_522-1,ID=B16_499-1,ID=B16_453-2,ID=B16_475-2,ID=B16_462-4,ID=B16_474-1,ID=B16_484-1,ID=B16_484-2,ID=B16_524-2	NA	NA
Lhfpl3	chr5	22746059	23275597	+	17	8.21256	9.57e-07	1.93e-05	17 [6,11]	0 [0,0]	1	ID=B16_488-3,ID=B16_464-2,ID=B16_464-1,ID=B16_450-1,ID=EL4_49-1,ID=B16_460-1,ID=B16_474-3,ID=B16_474-4,ID=EL4_67-2,ID=B16_450-3,ID=B16_451-3,ID=B16_462-4,ID=B16_484-4,ID=EL4_54-2,ID=B16_499-2,ID=B16_491-3,ID=LLC_167-1	NA	NA
Hs6st3	chr14	119138415	119869594	+	33	15.942	9.83e-07	1.97e-05	33 [15,18]	0 [0,0]	1	ID=EL4PD1_116-2,ID=B16_463-1,ID=B16_3-4,ID=EL4_28_4,ID=EL4_28_3,ID=B16_488-3,ID=EL4PD1_116-1,ID=B16_101NT-3,ID=B16_464-2,ID=B16_464-1,ID=B16_487-4,ID=B16_487-2,ID=B16_498-1,ID=B16_502-3,ID=B16_460-1,ID=B16_12-3,ID=B16PD1_537_2,ID=B16_474-3,ID=B16_474-4,ID=B16_497-1,ID=B16_485-4,ID=B16_521-2,ID=B16_454-3,ID=EL4_36_3,ID=B16_489-1,ID=EL4_70-3,ID=B16_499-1,ID=LLC_169-2,ID=B16_475-1,ID=B16_462-4,ID=LL…	NA	NA
Pde1c	chr6	56071701	56569103	-	16	7.72947	9.78e-07	1.97e-05	16 [6,10]	0 [0,0]	1	ID=B16_488-3,ID=EL4_26_4,ID=B16_464-1,ID=B16_487-4,ID=B16_498-2,ID=EL4_18_2,ID=B16_474-4,ID=B16_486-3,ID=B16_449-4,ID=B16_451-5,ID=B16_453-2,ID=B16_462-4,ID=B16_474-1,ID=B16_484-1,ID=EL4_29_2,ID=B16_491-2	NA	NA
Dhrs3	chr4	144893077	144928209	+	10	4.83092	9.93e-07	1.99e-05	9 [6,3]	1 [1,0]	1	ID=B16_463-1,ID=B16_464-2,ID=B16_485-1,ID=B16_502-3,ID=B16_460-1,ID=B16_497-2,ID=B16_450-3,ID=B16_449-4,ID=B16_451-3,ID=B16_499-2	NA	NA
Exoc6b	chr6	84618487	85069513	-	14	6.76329	1.07e-06	2.13e-05	14 [9,5]	0 [0,0]	0.999304	ID=B16_464-2,ID=B16_464-1,ID=B16_487-4,ID=B16_498-1,ID=B16_502-3,ID=B16_460-1,ID=B16PD1_537_1,ID=B16_474-3,ID=B16_486-3,ID=B16_449-3,ID=B16_499-1,ID=B16_451-5,ID=B16_462-4,ID=B16_484-2	NA	NA
Olfr968	chr9	39768776	39783253	-	9	4.34783	1.07e-06	2.13e-05	7 [5,2]	2 [0,2]	1	ID=B16PD1_534_2,ID=EL4_60-2,ID=B16_464-2,ID=B16_460-1,ID=B16_474-3,ID=B16_474-4,ID=B16_497-1,ID=B16_462-4,ID=EL4_65-1	NA	NA
Lpp	chr16	24393350	24992576	+	22	10.628	1.13e-06	2.24e-05	21 [9,12]	1 [1,0]	1	ID=B16_488-3,ID=B16_464-2,ID=B16_464-1,ID=B16_485-3,ID=B16_498-1,ID=B16_4-2,ID=B16_474-4,ID=EL4_19_2,ID=B16_525-2,ID=EL4_67-2,ID=B16_521-2,ID=B16_521-1,ID=EL4_36_3,ID=B16_489-1,ID=B16_449-3,ID=B16_13-3,ID=EL4_24_1,ID=B16_462-4,ID=EL4_47-1,ID=EL4PD1_152-2,ID=B16_469-1,ID=B16_524-1	NA	NA
Gabrb1	chr5	71658113	72108779	+	16	7.72947	1.18e-06	2.34e-05	16 [7,9]	0 [0,0]	1	ID=B16_463-1,ID=B16_464-2,ID=B16_464-1,ID=B16_485-1,ID=B16_498-2,ID=B16_498-1,ID=B16_502-3,ID=EL4_45-1,ID=B16_485-2,ID=EL4_36_3,ID=B16_489-1,ID=B16_499-1,ID=B16_475-1,ID=B16_462-4,ID=EL4_62-1,ID=B16_484-4	NA	NA
Mysm1	chr4	94942040	94979100	-	14	6.76329	1.18e-06	2.34e-05	14 [5,9]	0 [0,0]	1	ID=B16_463-1,ID=B16_464-2,ID=B16_485-1,ID=B16_487-4,ID=EL4PD1_114-3,ID=B16_460-1,ID=EL4_45-1,ID=B16_474-3,ID=B16_450-3,ID=B16_451-5,ID=B16_462-4,ID=B16_499-2,ID=B16_491-3,ID=B16_491-2	NA	NA
AC102350.1	chr9	10734640	10736536	+	5	2.41546	1.24e-06	2.45e-05	0 [0,0]	5 [5,0]	0.977915	ID=B16_485-1,ID=B16_502-3,ID=B16_486-3,ID=EL4_67-1,ID=EL4_64-1	NA	NA
Mast4	chr13	102732491	103334460	-	19	9.17874	1.26e-06	2.48e-05	19 [12,7]	0 [0,0]	1	ID=B16_463-1,ID=B16_488-3,ID=B16_464-1,ID=B16_485-3,ID=B16_450-1,ID=B16_498-1,ID=B16_502-3,ID=B16_460-1,ID=B16_474-3,ID=B16_474-4,ID=B16_497-1,ID=EL4_67-2,ID=B16_489-1,ID=B16_499-1,ID=B16_451-5,ID=B16_462-4,ID=EL4PD1_152-2,ID=B16_474-1,ID=B16_491-3	NA	NA
Mid1	chrX	169685199	169990798	+	6	2.89855	1.27e-06	2.49e-05	6 [3,3]	0 [0,0]	1	ID=B16_485-1,ID=B16_502-3,ID=B16PD1_161-4,ID=B16_485-4,ID=B16_462-4,ID=B16_499-2	NA	NA
Rbms3	chr9	116578025	117629913	-	50	24.1546	1.28e-06	2.51e-05	50 [22,28]	0 [0,0]	1	ID=B16_463-1,ID=B16_488-3,ID=EL4PD1_116-1,ID=B16_464-2,ID=B16_464-1,ID=EL4_60-1,ID=EL4PD1_116-3,ID=B16_485-1,ID=B16_487-4,ID=B16_487-2,ID=LLC_173-3,ID=B16_498-2,ID=B16_498-1,ID=B16_502-3,ID=EL4_49-1,ID=B16_460-1,ID=EL4_45-1,ID=B16_12-3,ID=B16_485-2,ID=B16_16-1,ID=B16_474-3,ID=B16_474-4,ID=B16_474-5,ID=EL4_59-1,ID=EL4PD1_115-3,ID=EL4_55-2,ID=B16_525-2,ID=B16_485-4,ID=EL4_67-2,ID=EL4_64-1,ID=B16_48…	NA	NA
Cdk5rap2	chr4	70216856	70410443	-	33	15.942	1.4e-06	2.73e-05	33 [13,20]	0 [0,0]	1	ID=B16_488-3,ID=B16_464-1,ID=B16_487-4,ID=B16_485-3,ID=LLC_173-3,ID=B16_498-2,ID=B16_498-1,ID=B16_519-1,ID=B16_502-3,ID=B16_460-1,ID=EL4_46-2,ID=B16_485-2,ID=B16_474-3,ID=B16_474-4,ID=B16_474-5,ID=B16_497-2,ID=B16_485-4,ID=EL4_64-1,ID=B16_489-1,ID=B16_450-3,ID=B16_449-4,ID=B16_499-1,ID=B16_451-5,ID=B16_451-3,ID=B16_461-1,ID=B16_475-2,ID=B16_462-4,ID=EL4_62-1,ID=B16_474-1,ID=B16_484-1,ID=B16_484-2…	NA	NA
Dcdc5	chr2	106038218	106385623	+	8	3.86473	1.39e-06	2.73e-05	8 [5,3]	0 [-1,1]	1	ID=B16_463-1,ID=B16_464-2,ID=B16_487-4,ID=B16_474-3,ID=B16_474-5,ID=B16_462-4,ID=LLC_170-1,ID=B16_484-1	NA	NA
Frem1	chr4	82897927	83052339	-	30	14.4928	1.41e-06	2.75e-05	30 [18,12]	0 [0,0]	1	ID=B16_3-4,ID=B16_488-3,ID=EL4_63-1,ID=B16_101NT-3,ID=B16_464-2,ID=B16_485-3,ID=B16_498-2,ID=B16_498-1,ID=B16_502-3,ID=EL4_49-1,ID=B16_460-1,ID=EL4_45-1,ID=B16_485-2,ID=B16_474-3,ID=B16_474-4,ID=B16_497-1,ID=B16_485-4,ID=B16_489-1,ID=B16_450-3,ID=B16_449-4,ID=B16_499-1,ID=B16_451-5,ID=B16_451-3,ID=B16_462-4,ID=EL4_47-1,ID=EL4_62-1,ID=B16_474-1,ID=B16_484-4,ID=B16_499-2,ID=B16_491-3	NA	NA
Trdn	chr10	33083483	33476709	+	15	7.24638	1.44e-06	2.79e-05	14 [6,8]	1 [0,1]	1	ID=B16_463-1,ID=B16_464-1,ID=B16_474-3,ID=EL4PD1_115-3,ID=B16_525-2,ID=B16_485-4,ID=EL4_67-2,ID=B16_517-1,ID=B16_522-2,ID=B16_522-1,ID=B16_499-1,ID=B16_462-4,ID=B16_474-1,ID=B16_499-2,ID=B16_491-3	NA	NA
Pdcd6ip	chr9	113651744	113708259	-	16	7.72947	1.47e-06	2.85e-05	9 [4,5]	7 [7,0]	1	ID=B16_464-2,ID=B16_456-4,ID=B16_519-1,ID=B16_502-3,ID=B16_452-1,ID=B16_474-3,ID=B16_521-2,ID=B16_449-4,ID=B16_453-2,ID=B16_518-2,ID=B16_462-3,ID=B16_462-4,ID=B16_469-1,ID=B16_474-1,ID=EL4PD1_152-1,ID=B16_520-2	NA	NA
Snap91	chr9	86765923	86880439	-	26	12.5604	1.49e-06	2.88e-05	25 [11,14]	1 [1,0]	0.970613	ID=EL4_60-2,ID=B16_488-3,ID=B16_464-2,ID=B16_485-1,ID=B16_450-1,ID=B16_502-3,ID=B16_502-1,ID=B16_460-1,ID=B16_485-2,ID=B16_474-3,ID=B16_474-4,ID=B16_474-5,ID=B16_497-1,ID=B16_485-4,ID=B16_489-1,ID=B16_450-3,ID=B16_449-4,ID=B16_451-5,ID=B16_451-3,ID=B16_461-1,ID=B16_475-1,ID=B16_462-4,ID=B16PD1_163-1,ID=B16_474-1,ID=B16_484-2,ID=B16_491-3	NA	NA
Dip2c	chr13	9276528	9668928	+	10	4.83092	1.53e-06	2.96e-05	10 [7,3]	0 [0,0]	1	ID=B16_487-4,ID=B16_450-1,ID=B16_502-3,ID=B16_460-1,ID=B16PD1_533_3,ID=B16_474-4,ID=B16_454-3,ID=B16_450-3,ID=B16_499-1,ID=B16_451-5	NA	NA
Carmil3	chr14	55491093	55508246	+	6	2.89855	1.6e-06	3.08e-05	6 [4,2]	0 [0,0]	1	ID=EL4_28_4,ID=EL4_18_2,ID=EL4_19_2,ID=EL4_32_3,ID=EL4_33_2,ID=EL4_25_3	NA	NA
Pex16	chr2	92374676	92381216	+	4	1.93237	1.68e-06	3.22e-05	4 [2,2]	0 [0,0]	1	ID=B16_487-4,ID=B16_502-3,ID=B16_497-2,ID=B16_499-2	NA	NA
Zfp622	chr15	25984366	25998482	+	8	3.86473	1.76e-06	3.37e-05	8 [7,1]	0 [0,0]	1	ID=B16_488-3,ID=B16_464-1,ID=EL4PD1_156-2,ID=EL4PD1_154-1,ID=B16_489-1,ID=B16_450-3,ID=EL4PD1_152-2,ID=B16_491-3	NA	NA
Rbfox1	chr16	6809222	7409813	+	21	10.1449	1.79e-06	3.42e-05	21 [11,10]	0 [0,0]	1	ID=B16_463-1,ID=B16PD1_534_3,ID=EL4_28_3,ID=B16_464-2,ID=B16_464-1,ID=B16_487-4,ID=B16_498-1,ID=B16_519-3,ID=B16_502-3,ID=EL4_22_3,ID=EL4PD1_104-1,ID=B16_474-4,ID=B16_474-5,ID=B16_489-1,ID=B16_449-3,ID=B16_499-1,ID=B16_462-4,ID=EL4_65-1,ID=B16_484-2,ID=B16_499-2,ID=B16_516-2	NA	NA
Large1	chr8	72814599	73353540	-	18	8.69565	1.8e-06	3.43e-05	18 [7,11]	0 [0,0]	1	ID=B16_463-1,ID=B16_455-2,ID=B16_455-1,ID=B16_464-1,ID=B16_485-1,ID=B16_485-3,ID=B16_460-1,ID=EL4_45-1,ID=B16_485-2,ID=B16_474-4,ID=B16_485-4,ID=B16_450-3,ID=B16_499-1,ID=B16_518-2,ID=B16_462-4,ID=B16_469-1,ID=B16_484-1,ID=B16_499-2	NA	NA
St6galnac3	chr3	153198266	153725174	-	11	5.31401	1.8e-06	3.43e-05	11 [6,5]	0 [0,0]	1	ID=EL4_41-1,ID=B16_488-3,ID=B16_464-2,ID=B16_464-1,ID=B16PD1_537_4,ID=EL4_52-5,ID=EL4_36_2,ID=B16_489-1,ID=B16_499-1,ID=B16_462-4,ID=B16_491-3	NA	human T-ALL driver
Mto1	chr9	78448208	78474152	+	10	4.83092	1.81e-06	3.43e-05	10 [8,2]	0 [0,0]	1	ID=B16_463-1,ID=B16_485-3,ID=B16_502-3,ID=B16_474-4,ID=B16_489-1,ID=B16_449-3,ID=B16_462-3,ID=B16_469-1,ID=B16_474-1,ID=B16_484-2	NA	NA
Ugt1a2	chr1	88200601	88218997	+	8	3.86473	1.86e-06	3.52e-05	8 [3,5]	0 [0,0]	1	ID=B16_463-1,ID=B16_488-3,ID=B16_487-4,ID=B16_519-3,ID=B16_502-3,ID=EL4_64-5,ID=B16_499-1,ID=B16_462-4	NA	NA
Tgfbrap1	chr1	43047200	43098622	-	14	6.76329	1.95e-06	3.65e-05	14 [4,10]	0 [0,0]	0.894306	ID=B16_463-1,ID=EL4_28_4,ID=B16_464-1,ID=B16_460-1,ID=B16_474-4,ID=B16_486-3,ID=EL4_33_2,ID=EL4_52-5,ID=B16PD1_531_1,ID=EL4_67-2,ID=EL4_36_3,ID=B16_489-1,ID=EL4_65-1,ID=EL4_54-2	NA	NA
Cnksr2	chrX	157821436	158043294	-	4	1.93237	1.98e-06	3.7e-05	4 [2,2]	0 [0,0]	1	ID=B16_497-1,ID=EL4_34_5,ID=B16_489-1,ID=B16_499-1	NA	NA
Psmb2	chr4	126677630	126709714	+	12	5.7971	1.99e-06	3.73e-05	11 [6,5]	1 [0,1]	1	ID=B16_455-1,ID=B16_464-1,ID=B16_485-1,ID=B16_502-3,ID=B16_474-3,ID=B16_474-4,ID=B16_450-3,ID=B16_449-3,ID=B16_499-1,ID=B16_518-1,ID=B16_462-4,ID=B16_499-2	NA	NA
Kank4	chr4	98754898	98817537	-	14	6.76329	2.17e-06	4.05e-05	14 [9,5]	0 [0,0]	1	ID=B16_488-3,ID=B16_464-2,ID=B16_464-1,ID=B16_498-1,ID=LLC_168-1,ID=B16_502-3,ID=B16_474-3,ID=B16_474-4,ID=B16_489-1,ID=B16_450-3,ID=EL4_47-1,ID=B16_474-1,ID=EL4PD1_117-3,ID=B16_491-3	NA	NA
Pex10	chr4	155067016	155072433	+	4	1.93237	2.29e-06	4.26e-05	1 [0,1]	3 [0,3]	1	ID=B16_464-2,ID=EL4PD1_149-2,ID=EL4PD1_104-1,ID=EL4PD1_115-2	NA	NA
Olfr24	chr9	18751507	18763996	-	8	3.86473	2.36e-06	4.39e-05	7 [3,4]	1 [2,-1]	0.923894	ID=B16_488-3,ID=B16_485-1,ID=B16_450-1,ID=B16_498-1,ID=B16_474-3,ID=B16_489-1,ID=B16_474-1,ID=B16_491-3	NA	NA
Klf13	chr7	63886351	63938915	-	12	5.7971	2.39e-06	4.43e-05	12 [7,5]	0 [0,0]	0.999975	ID=EL4_28_2,ID=EL4_26_4,ID=B16_464-1,ID=EL4PD1_156-2,ID=EL4_32_1,ID=B16PD1_537_4,ID=EL4_19_2,ID=EL4_33_2,ID=EL4_32_2,ID=EL4_24_1,ID=EL4PD1_152-2,ID=EL4_29_2	NA	NA
Mecom	chr3	29977344	30548008	-	20	9.66184	2.46e-06	4.53e-05	20 [9,11]	0 [0,0]	0.965587	ID=B16_463-1,ID=EL4_60-2,ID=B16_488-3,ID=B16_464-2,ID=B16_464-1,ID=B16_498-2,ID=B16_498-1,ID=B16_460-1,ID=B16_474-3,ID=B16_474-4,ID=B16_474-5,ID=EL4_67-3,ID=B16_489-1,ID=B16_450-3,ID=B16_499-1,ID=B16_13-1,ID=EL4_47-1,ID=LLC_170-1,ID=B16_484-2,ID=B16_499-2	NA	NA
Zcchc16	chrX	144688907	145122411	+	16	7.72947	2.47e-06	4.53e-05	16 [9,7]	0 [0,0]	1	ID=EL4_28_3,ID=B16_488-3,ID=B16_519-3,ID=B16_460-1,ID=B16PD1_537_1,ID=B16_497-1,ID=EL4_32_3,ID=EL4_48-4,ID=EL4_36_3,ID=EL4_38_3,ID=B16_449-4,ID=EL4_65-1,ID=B16_484-1,ID=B16_484-2,ID=EL4_54-2,ID=B16_499-2	NA	NA
Cntn3	chr6	102163304	102573101	-	14	6.76329	2.56e-06	4.65e-05	14 [9,5]	0 [0,0]	1	ID=B16_463-1,ID=B16_488-3,ID=B16_485-1,ID=B16_487-4,ID=B16_498-1,ID=B16_502-3,ID=B16_460-1,ID=EL4_45-1,ID=EL4_34_5,ID=B16_517-1,ID=EL4_70-3,ID=B16_499-1,ID=B16_462-4,ID=B16_491-2	NA	NA
Arg2	chr12	79130777	79156301	+	10	4.83092	2.57e-06	4.66e-05	10 [3,7]	0 [0,0]	0.999527	ID=B16_463-1,ID=B16_464-2,ID=B16_464-1,ID=B16_487-4,ID=B16_498-1,ID=B16_502-3,ID=EL4_45-1,ID=EL4_67-2,ID=B16_499-1,ID=B16_499-2	NA	NA
Skint10	chr4	112711147	112774825	-	20	9.66184	2.67e-06	4.82e-05	19 [14,5]	1 [1,0]	1	ID=B16_463-1,ID=B16_464-2,ID=EL4_60-1,ID=B16_485-1,ID=B16_460-1,ID=B16_474-3,ID=B16_474-4,ID=B16_474-5,ID=B16_497-2,ID=EL4_59-1,ID=EL4PD1_150-2,ID=B16_451-3,ID=B16_462-4,ID=EL4_47-2,ID=EL4_47-1,ID=B16_484-4,ID=B16_484-1,ID=B16_484-2,ID=B16_499-2,ID=B16_491-3	NA	NA
Sh3bgrl3	chr4	134127406	134128789	-	3	1.44928	2.71e-06	4.87e-05	0 [0,0]	3 [0,3]	1	ID=B16_3-4,ID=B16_1-2,ID=B16_13-1	NA	NA
Cacna2d1	chr5	15934691	16374511	+	18	8.69565	2.74e-06	4.92e-05	18 [8,10]	0 [0,0]	1	ID=B16_463-1,ID=EL4_28_2,ID=EL4_28_3,ID=B16_464-2,ID=B16_450-1,ID=B16_460-1,ID=B16_485-2,ID=B16_474-3,ID=B16_474-4,ID=EL4_27_3,ID=EL4PD1_115-3,ID=B16_489-1,ID=B16_449-4,ID=B16_462-4,ID=EL4_62-1,ID=B16_474-1,ID=B16_484-1,ID=B16_491-3	NA	NA
Olfr958	chr9	39547958	39554054	-	6	2.89855	2.82e-06	5.03e-05	3 [1,2]	3 [1,2]	1	ID=B16_464-2,ID=B16_460-1,ID=B16_485-4,ID=EL4_62-1,ID=B16_474-1,ID=B16_499-2	NA	NA
Supt3	chr17	44777152	45119290	+	8	3.86473	2.86e-06	5.1e-05	8 [6,2]	0 [0,0]	1	ID=B16_502-3,ID=EL4_32_3,ID=B16_486-3,ID=B16PD1_531_1,ID=EL4_25_3,ID=B16_499-1,ID=B16_451-3,ID=B16_462-4	NA	NA
Rabgap1l	chr1	160257205	160792946	-	25	12.0773	2.87e-06	5.11e-05	24 [12,12]	1 [0,1]	0.998514	ID=B16_463-1,ID=B16_464-1,ID=B16_485-3,ID=B16_487-2,ID=B16_498-1,ID=LLC_172-2,ID=EL4_18_2,ID=EL4_45-1,ID=B16_485-2,ID=B16PD1_161-4,ID=B16_474-3,ID=B16_474-4,ID=B16_486-3,ID=B16_485-4,ID=EL4_52-5,ID=EL4_67-2,ID=EL4_64-5,ID=B16_489-1,ID=B16_499-1,ID=B16_518-2,ID=EL4_48-1,ID=B16_462-4,ID=EL4_62-1,ID=B16_484-1,ID=B16_491-3	NA	NA
1700007G11Rik	chr5	98329304	98802019	+	17	8.21256	2.97e-06	5.27e-05	17 [8,9]	0 [0,0]	1	ID=B16_464-1,ID=B16_485-1,ID=EL4_37_2,ID=B16PD1_537_4,ID=B16_474-3,ID=B16_497-1,ID=EL4PD1_113-1,ID=B16_525-2,ID=B16_485-4,ID=EL4_64-1,ID=B16PD1_532_1,ID=EL4_36_4,ID=B16_489-1,ID=B16_451-3,ID=B16_484-4,ID=B16_499-2,ID=B16_516-2	NA	NA
Akap6	chr12	52699383	53155599	+	14	6.76329	3.02e-06	5.35e-05	14 [9,5]	0 [0,0]	0.943008	ID=B16_488-3,ID=B16_464-2,ID=B16_456-4,ID=B16_487-4,ID=B16_498-1,ID=B16_502-3,ID=B16_460-1,ID=B16PD1_531_1,ID=EL4_67-2,ID=EL4_36_3,ID=B16_451-5,ID=B16_462-4,ID=B16_484-2,ID=EL4PD1_117-1	NA	NA
Toporsl	chr4	52596274	52612430	+	8	3.86473	3.06e-06	5.41e-05	8 [2,6]	0 [0,0]	1	ID=B16_488-3,ID=B16_502-3,ID=B16_460-1,ID=EL4PD1_115-3,ID=B16_449-4,ID=B16_451-3,ID=B16_499-2,ID=B16_491-3	NA	NA
Maml3	chr3	51685907	52105076	-	6	2.89855	3.12e-06	5.51e-05	6 [3,3]	0 [0,0]	1	ID=B16_450-1,ID=B16_489-1,ID=B16_450-3,ID=B16_462-4,ID=EL4_54-2,ID=B16_515-1	NA	NA
Sema5a	chr15	32244813	32696341	+	14	6.76329	3.2e-06	5.64e-05	14 [6,8]	0 [0,0]	1	ID=B16_463-1,ID=B16_464-2,ID=B16_464-1,ID=B16_498-1,ID=EL4_18_2,ID=B16_502-1,ID=B16_474-3,ID=B16_474-5,ID=EL4_55-2,ID=B16_485-4,ID=B16_489-1,ID=B16_451-3,ID=B16_462-4,ID=B16_499-2	NA	NA
Vmn2r85	chr10	130417772	130429612	-	8	3.86473	3.31e-06	5.81e-05	8 [6,2]	0 [0,0]	1	ID=EL4_28_3,ID=B16_464-2,ID=B16_460-1,ID=EL4_32_1,ID=B16PD1_537_4,ID=EL4PD1_118-1,ID=B16_499-2,ID=EL4_29_2	NA	NA
Camkmt	chr17	85090726	85458139	+	7	3.38164	3.4e-06	5.93e-05	7 [5,2]	0 [0,0]	1	ID=B16_464-2,ID=B16_464-1,ID=B16_485-3,ID=B16_474-5,ID=B16_485-4,ID=B16_499-1,ID=B16_462-4	NA	NA
B3galt1	chr2	67748212	68118150	+	11	5.31401	3.58e-06	6.24e-05	11 [7,4]	0 [0,0]	1	ID=B16_101NT-3,ID=B16_498-2,ID=B16_502-3,ID=B16_460-1,ID=B16_474-3,ID=B16_474-4,ID=EL4_27_3,ID=B16_517-1,ID=B16_462-3,ID=B16_462-4,ID=B16_484-4	NA	NA
BC052040	chr2	115581716	115778768	+	37	17.8744	3.65e-06	6.35e-05	37 [17,20]	0 [0,0]	0.906518	ID=B16_455-1,ID=EL4_60-2,ID=B16_464-1,ID=B16_456-4,ID=B16_487-4,ID=B16_487-2,ID=B16_498-2,ID=B16_519-1,ID=B16_452-1,ID=EL4_46-2,ID=B16_474-3,ID=EL4_55-2,ID=B16_525-2,ID=B16_525-1,ID=EL4_67-1,ID=B16_521-1,ID=EL4_64-1,ID=B16_454-3,ID=B16_517-1,ID=B16_489-1,ID=B16_522-2,ID=B16_449-4,ID=B16_522-1,ID=B16_451-5,ID=B16_453-2,ID=B16_518-1,ID=B16_462-4,ID=B16_474-1,ID=B16_484-1,ID=B16_524-1,ID=B16_451-4,I…	NA	NA
Plxdc2	chr2	16356304	16755839	+	14	6.76329	3.77e-06	6.56e-05	14 [5,9]	0 [0,0]	1	ID=B16_464-2,ID=B16_487-4,ID=B16_502-3,ID=B16_460-1,ID=EL4_45-1,ID=B16_485-2,ID=B16_474-4,ID=EL4_55-2,ID=B16_485-4,ID=B16_489-1,ID=B16_522-1,ID=B16_499-1,ID=B16_451-5,ID=B16_499-2	NA	NA
CT025751.2	chr9	113530229	113531233	+	3	1.44928	3.83e-06	6.64e-05	2 [0,2]	1 [0,1]	1	ID=B16_488-3,ID=B16PD1_537_1,ID=B16_474-4	NA	NA
Olfr983	chr9	40086908	40093595	-	6	2.89855	4.18e-06	7.21e-05	3 [2,1]	3 [2,1]	1	ID=B16_464-2,ID=B16_502-3,ID=B16_474-3,ID=EL4PD1_157-2,ID=B16_489-1,ID=B16_484-2	NA	NA
Slc24a3	chr2	145167754	145642166	+	13	6.28019	4.6e-06	7.9e-05	13 [8,5]	0 [0,0]	1	ID=B16_468-4,ID=B16_460-1,ID=B16PD1_537_1,ID=B16_485-2,ID=B16_474-3,ID=B16_474-4,ID=EL4_32_2,ID=B16_489-1,ID=B16_450-3,ID=B16_451-5,ID=B16_451-3,ID=EL4_48-1,ID=B16_462-4	NA	NA
Cadps2	chr6	23262773	23839421	-	26	12.5604	4.72e-06	8.09e-05	26 [12,14]	0 [0,0]	0.999322	ID=B16_468-4,ID=EL4_28_4,ID=EL4_28_1,ID=B16_488-3,ID=B16_464-2,ID=B16_464-1,ID=B16_487-4,ID=EL4_68-1,ID=B16_498-2,ID=B16_498-1,ID=B16_502-3,ID=EL4_45-1,ID=B16_474-4,ID=EL4_55-2,ID=EL4_64-1,ID=EL4_36_3,ID=EL4_36_2,ID=B16_489-1,ID=B16_499-1,ID=B16_13-1,ID=B16_451-5,ID=B16_475-1,ID=B16_474-1,ID=B16_499-2,ID=B16_491-3,ID=B16_474-2	NA	NA
Ttc27	chr17	74717750	74863570	+	28	13.5266	5.42e-06	9.22e-05	28 [10,18]	0 [0,0]	0.837615	ID=B16_488-3,ID=B16_101NT-3,ID=B16_464-1,ID=B16_485-1,ID=B16_487-2,ID=B16_498-2,ID=B16_498-1,ID=B16_519-1,ID=B16_460-1,ID=B16_485-2,ID=B16_497-2,ID=EL4_55-2,ID=B16_525-1,ID=B16_485-4,ID=B16_521-2,ID=B16_454-3,ID=B16_517-1,ID=B16_489-1,ID=B16_449-3,ID=B16_522-1,ID=B16_499-1,ID=B16_451-3,ID=B16_474-1,ID=B16_484-1,ID=B16_499-2,ID=B16_491-3,ID=B16_520-2,ID=B16_491-2	NA	NA
Skint2	chr4	112557194	112647840	+	24	11.5942	5.41e-06	9.22e-05	23 [10,13]	1 [1,0]	0.971455	ID=B16_488-3,ID=B16_464-2,ID=EL4PD1_116-3,ID=B16_485-1,ID=EL4_18_2,ID=B16_502-3,ID=B16_460-1,ID=B16_474-3,ID=B16_474-4,ID=EL4_27_3,ID=EL4PD1_114-1,ID=B16_486-3,ID=EL4PD1_115-3,ID=B16_485-4,ID=EL4_36_3,ID=B16_489-1,ID=B16_450-3,ID=B16_499-1,ID=B16_451-3,ID=B16_475-2,ID=B16_462-4,ID=LLC_170-1,ID=B16_499-2,ID=B16_491-3	NA	NA
Ttc39b	chr4	83220300	83324255	-	21	10.1449	5.41e-06	9.22e-05	21 [13,8]	0 [0,0]	0.970747	ID=B16_463-1,ID=B16_488-3,ID=B16_464-2,ID=B16_485-1,ID=B16_485-3,ID=B16_502-3,ID=B16_502-1,ID=B16_474-3,ID=B16_474-4,ID=B16_474-5,ID=B16_485-4,ID=B16_489-1,ID=B16_449-4,ID=B16_475-2,ID=B16_462-4,ID=EL4_47-1,ID=EL4_62-1,ID=B16_474-1,ID=B16_484-4,ID=B16_499-2,ID=B16_474-2	NA	NA
Gng11	chr6	4003904	4008445	+	5	2.41546	5.61e-06	9.52e-05	3 [3,0]	2 [0,2]	1	ID=B16_488-3,ID=B16_464-2,ID=B16_485-2,ID=B16_497-1,ID=B16_475-1	NA	NA
Vps13b	chr15	35371546	35931228	+	26	12.5604	5.62e-06	9.53e-05	26 [18,8]	0 [0,0]	0.974781	ID=B16_463-1,ID=EL4_28_4,ID=B16_455-2,ID=B16_455-1,ID=B16_464-2,ID=B16_464-1,ID=B16_487-2,ID=B16_460-1,ID=B16_474-3,ID=B16_474-4,ID=EL4PD1_150-2,ID=B16_521-1,ID=EL4_36_2,ID=EL4_38_3,ID=B16_489-1,ID=B16_450-3,ID=B16_499-1,ID=B16_451-5,ID=B16_475-2,ID=B16_462-4,ID=B16PD1_163-1,ID=EL4_54-2,ID=EL4_61-2,ID=B16_491-3,ID=B16_516-2,ID=B16_520-2	NA	NA
Foxp1	chr6	98929189	99520997	-	17	8.21256	5.78e-06	9.77e-05	17 [7,10]	0 [0,0]	1	ID=EL4_28_3,ID=B16_488-3,ID=B16_464-2,ID=B16_464-1,ID=EL4PD1_156-2,ID=B16_460-1,ID=EL4_46-2,ID=B16_16-3,ID=B16_474-3,ID=B16_474-4,ID=B16_497-1,ID=B16_489-1,ID=B16_450-3,ID=B16_451-3,ID=EL4_47-1,ID=EL4PD1_152-2,ID=B16_499-2	NA	NA
Olfr957	chr9	39510234	39515809	-	6	2.89855	5.86e-06	9.87e-05	5 [3,2]	1 [0,1]	1	ID=B16_464-2,ID=B16_474-3,ID=B16_474-4,ID=EL4_39-4,ID=B16_462-4,ID=EL4_54-2	NA	NA
Rims2	chr15	39198332	39681940	+	23	11.1111	5.95e-06	0.000100018	23 [11,12]	0 [0,0]	0.999969	ID=B16_3-4,ID=B16_488-3,ID=B16_464-2,ID=B16_464-1,ID=B16_485-1,ID=B16_487-4,ID=B16_487-2,ID=LLC_171-2,ID=LLC_168-1,ID=EL4_18_2,ID=B16_460-1,ID=B16_474-3,ID=B16_474-4,ID=B16_497-1,ID=B16_497-2,ID=B16_489-1,ID=B16_451-5,ID=B16_462-4,ID=B16_499-2,ID=EL4_29_2,ID=B16_491-3,ID=B16_520-1,ID=B16_474-2	NA	NA
Cpq	chr15	33083129	33594552	+	21	10.1449	5.96e-06	0.000100038	21 [10,11]	0 [0,0]	1	ID=B16_463-1,ID=B16_488-3,ID=EL4_26_4,ID=B16_464-2,ID=B16_464-1,ID=B16_474-3,ID=B16_474-4,ID=B16_485-4,ID=EL4_36_3,ID=EL4_38_3,ID=B16_449-4,ID=B16_499-1,ID=B16_451-5,ID=B16_462-4,ID=EL4_65-1,ID=EL4_47-2,ID=B16_484-1,ID=B16_499-2,ID=EL4_29_2,ID=B16_491-3,ID=B16_491-2	NA	NA
Rex2	chr4	147021850	147060794	+	13	6.28019	5.99e-06	0.000100271	11 [2,9]	2 [2,0]	1	ID=B16_488-3,ID=B16_464-2,ID=B16_4-2,ID=EL4_22_3,ID=B16_474-4,ID=B16_454-3,ID=B16_1-1,ID=EL4PD1_118-2,ID=EL4PD1_152-2,ID=EL4_62-1,ID=EL4_72-3,ID=EL4_54-2,ID=EL4PD1_152-1	NA	NA
Olfr943	chr9	39166310	39192350	+	12	5.7971	6.02e-06	0.000100578	12 [10,2]	0 [0,0]	0.998931	ID=B16_463-1,ID=B16_464-2,ID=B16_464-1,ID=B16_487-2,ID=EL4PD1_114-3,ID=B16_502-3,ID=B16_460-1,ID=B16_497-2,ID=B16_451-5,ID=B16_484-2,ID=B16_499-2,ID=B16_491-3	NA	NA
Guca2b	chr4	119656607	119658954	-	3	1.44928	6.23e-06	0.000103794	0 [0,0]	3 [0,3]	1	ID=B16_488-3,ID=B16_485-1,ID=B16_474-4	NA	NA
Tanc2	chr11	105589991	105929304	+	10	4.83092	6.26e-06	0.000104076	10 [6,4]	0 [0,0]	1	ID=B16_464-2,ID=B16_464-1,ID=B16_474-3,ID=EL4_34_5,ID=B16_485-4,ID=B16_521-2,ID=B16_521-1,ID=B16_462-4,ID=B16_484-4,ID=B16_499-2	NA	NA
Hs6st2	chrX	51387212	51681856	-	5	2.41546	6.3e-06	0.000104573	3 [1,2]	2 [2,0]	1	ID=EL4_28_2,ID=B16_488-3,ID=B16_498-2,ID=B16_474-3,ID=EL4_65-1	NA	NA
Tmem178b	chr6	39873271	40255075	+	7	3.38164	6.38e-06	0.000105702	7 [3,4]	0 [0,0]	1	ID=B16_464-1,ID=B16_450-1,ID=B16_460-1,ID=B16_499-1,ID=B16_484-1,ID=B16_499-2,ID=B16_491-3	NA	NA
Jazf1	chr6	52768797	53068631	-	3	1.44928	6.43e-06	0.000106201	3 [2,1]	0 [0,0]	1	ID=B16_101NT-3,ID=B16_502-1,ID=B16_491-2	NA	NA
Arl15	chr13	113794505	114157461	+	7	3.38164	6.59e-06	0.000108499	7 [4,3]	0 [0,0]	1	ID=EL4_28_1,ID=B16_464-2,ID=B16_464-1,ID=B16_460-1,ID=B16_474-3,ID=B16PD1_531_2,ID=B16_451-5	NA	NA
Slit2	chr5	47983138	48307733	+	10	4.83092	7e-06	0.000115161	9 [4,5]	1 [1,0]	1	ID=B16_464-2,ID=B16_464-1,ID=B16_485-3,ID=B16_450-1,ID=B16_474-4,ID=EL4_55-2,ID=B16_489-1,ID=B16_449-4,ID=B16_499-1,ID=B16_462-4	NA	NA
Rpl23a-ps6	chr4	37238708	37239175	-	4	1.93237	7.07e-06	0.000115844	0 [0,0]	4 [4,0]	1	ID=B16_464-2,ID=B16_450-1,ID=B16_474-4,ID=B16_489-1	NA	NA
Trhde	chr10	114398823	114801364	-	16	7.72947	7.22e-06	0.000118145	16 [7,9]	0 [0,0]	1	ID=B16PD1_534_1,ID=EL4PD1_116-1,ID=B16_464-2,ID=B16_464-1,ID=B16_485-1,ID=B16_487-4,ID=B16_498-1,ID=B16_485-2,ID=B16_474-4,ID=EL4_67-2,ID=B16_517-1,ID=B16_489-1,ID=B16_522-2,ID=B16_450-3,ID=B16_462-4,ID=B16_484-1	NA	NA
Pclo	chr5	14514918	14863459	+	13	6.28019	7.52e-06	0.000122715	13 [8,5]	0 [0,0]	1	ID=B16_488-3,ID=B16_464-2,ID=B16_464-1,ID=B16_502-3,ID=B16_460-1,ID=B16_474-3,ID=B16_474-4,ID=EL4_59-1,ID=EL4PD1_115-3,ID=B16_489-1,ID=B16_499-1,ID=B16_484-1,ID=B16_491-3	NA	NA
Psd3	chr8	67696890	68206057	-	22	10.628	7.67e-06	0.000124491	22 [11,11]	0 [0,0]	1	ID=EL4_41-1,ID=B16_463-1,ID=B16PD1_534_1,ID=B16_488-3,ID=B16_464-1,ID=B16_485-3,ID=B16_519-3,ID=B16_474-3,ID=B16_474-5,ID=B16_486-3,ID=EL4_64-1,ID=EL4_43-2,ID=B16_489-1,ID=B16_499-1,ID=B16_474-1,ID=LLC_170-1,ID=B16_484-4,ID=B16_484-1,ID=B16_499-2,ID=B16_491-3,ID=B16_491-2,ID=B16_474-2	NA	NA
Lrrc7	chr3	158082895	158562221	-	21	10.1449	7.65e-06	0.000124491	21 [13,8]	0 [1,-1]	1	ID=EL4_28_1,ID=B16_488-3,ID=B16_456-4,ID=B16_487-2,ID=B16_450-1,ID=B16_498-1,ID=EL4_18_2,ID=B16_502-3,ID=B16_460-1,ID=EL4_45-1,ID=EL4_22_3,ID=B16_485-2,ID=B16_474-4,ID=B16_486-3,ID=B16_485-4,ID=B16_450-3,ID=B16_462-4,ID=EL4_62-1,ID=EL4_72-3,ID=B16_515-1,ID=B16_491-3	NA	NA
Cacna1d	chr14	30039949	30491156	-	10	4.83092	7.68e-06	0.000124491	10 [4,6]	0 [0,0]	1	ID=B16_463-1,ID=B16_464-2,ID=EL4_32_1,ID=B16_474-4,ID=EL4_59-1,ID=B16_489-1,ID=B16_451-5,ID=B16_451-3,ID=B16PD1_163-1,ID=B16_499-2	NA	NA
Hmgb4	chr4	128260212	128260957	-	3	1.44928	7.66e-06	0.000124491	0 [0,0]	3 [2,1]	1	ID=B16_464-2,ID=EL4PD1_114-1,ID=B16_489-1	NA	NA
Olfr891	chr9	38179871	38180821	-	4	1.93237	7.79e-06	0.000125826	0 [0,0]	4 [0,4]	0.939689	ID=B16_464-2,ID=B16_502-3,ID=B16_489-1,ID=B16_499-1	NA	NA
Htr2c	chrX	146962514	147197277	+	5	2.41546	8.06e-06	0.000129633	5 [4,1]	0 [0,0]	1	ID=B16_463-1,ID=EL4_28_4,ID=B16_485-3,ID=B16_502-3,ID=B16_497-1	NA	NA
Rev1	chr1	38052786	38129662	-	20	9.66184	8.23e-06	0.000132143	20 [12,8]	0 [0,0]	0.997907	ID=EL4PD1_116-2,ID=EL4_41-1,ID=B16_463-1,ID=B16_488-3,ID=B16_464-1,ID=B16_498-1,ID=B16_519-3,ID=B16_452-1,ID=EL4_45-1,ID=B16PD1_537_1,ID=B16_485-2,ID=B16_16-1,ID=B16_485-4,ID=B16_521-1,ID=B16_517-1,ID=B16_450-3,ID=B16_499-1,ID=B16_17-3,ID=B16_520-2,ID=B16_520-1	NA	NA
C8b	chr4	104766317	104804548	+	11	5.31401	8.86e-06	0.000141703	8 [4,4]	3 [0,3]	0.917252	ID=EL4PD1_116-2,ID=B16_488-3,ID=B16_498-2,ID=EL4_49-1,ID=B16_460-1,ID=B16_474-3,ID=B16_474-4,ID=B16_13-3,ID=B16_451-3,ID=B16_462-4,ID=B16_484-2	NA	NA
Olfr974	chr9	39937501	39945170	+	6	2.89855	9.16e-06	0.000146373	2 [1,1]	4 [2,2]	0.992233	ID=B16_474-3,ID=B16_474-4,ID=B16_450-3,ID=EL4PD1_118-2,ID=B16_484-4,ID=B16_491-3	NA	NA
Pard3	chr8	127064056	127612286	+	19	9.17874	9.43e-06	0.000150347	18 [7,11]	1 [1,0]	0.999343	ID=B16_463-1,ID=EL4_28_3,ID=B16_464-1,ID=EL4PD1_114-3,ID=B16_502-3,ID=B16_460-1,ID=EL4_32_1,ID=B16_474-4,ID=EL4_32_3,ID=EL4PD1_115-2,ID=B16_485-4,ID=EL4_36_3,ID=EL4_38_3,ID=B16_489-1,ID=EL4_70-3,ID=B16_499-1,ID=B16_451-3,ID=B16_484-4,ID=B16_491-3	NA	NA
Cep112	chr11	108425192	108860615	+	15	7.24638	9.54e-06	0.000151823	15 [9,6]	0 [0,0]	0.998572	ID=B16_464-2,ID=EL4PD1_116-3,ID=B16_485-1,ID=B16_487-4,ID=B16_485-3,ID=B16_474-3,ID=B16_474-4,ID=B16_497-1,ID=EL4_67-1,ID=EL4_36_3,ID=B16_450-3,ID=B16_449-4,ID=B16_499-1,ID=EL4_65-1,ID=EL4_62-1	NA	NA
Kcnd2	chr6	21215503	21729805	+	27	13.0435	9.83e-06	0.000155939	27 [11,16]	0 [0,0]	0.988024	ID=B16_463-1,ID=B16_488-3,ID=B16_101NT-3,ID=B16_464-2,ID=B16_487-4,ID=B16_498-2,ID=B16_498-1,ID=LLC_171-2,ID=B16_460-1,ID=B16_485-2,ID=B16_474-4,ID=B16_497-1,ID=EL4_19_2,ID=EL4_59-1,ID=B16_486-3,ID=EL4_36_3,ID=B16_489-1,ID=B16_450-3,ID=B16_449-3,ID=B16_499-1,ID=B16_462-4,ID=EL4_65-1,ID=B16_484-1,ID=B16_484-2,ID=B16_499-2,ID=B16_491-3,ID=B16_520-1	NA	NA
Pcdh7	chr5	57717967	58133230	+	18	8.69565	9.97e-06	0.000157814	18 [9,9]	0 [0,0]	0.969368	ID=B16_464-2,ID=B16_464-1,ID=B16_485-1,ID=B16_487-4,ID=B16_487-2,ID=B16_498-1,ID=B16_502-3,ID=B16_460-1,ID=B16_474-4,ID=EL4_36_3,ID=B16_489-1,ID=B16_461-1,ID=B16_462-4,ID=EL4PD1_117-3,ID=B16_484-2,ID=B16_499-2,ID=B16_491-3,ID=B16_491-2	NA	NA
Cyp2j15-ps	chr4	96245560	96274270	-	11	5.31401	1.01e-05	0.000159825	9 [4,5]	2 [1,1]	1	ID=B16_488-3,ID=B16_464-2,ID=B16_460-1,ID=B16_485-2,ID=B16_474-3,ID=B16_474-4,ID=EL4_32_2,ID=EL4_64-1,ID=B16_451-3,ID=EL4_62-1,ID=EL4_54-2	NA	NA
Slc4a10	chr2	62046462	62326730	+	8	3.86473	1.02e-05	0.00016162	8 [2,6]	0 [0,0]	1	ID=B16_464-2,ID=B16_464-1,ID=EL4_18_2,ID=B16_502-3,ID=B16_474-4,ID=EL4_59-1,ID=EL4PD1_115-3,ID=EL4_64-5	NA	NA
Zfp407	chr18	84128027	84558425	-	13	6.28019	1.05e-05	0.000164627	12 [6,6]	1 [1,0]	1	ID=B16_488-3,ID=B16_464-2,ID=B16_464-1,ID=B16_502-3,ID=B16_502-1,ID=B16_474-4,ID=EL4_32_2,ID=B16_451-3,ID=B16_462-4,ID=EL4_62-1,ID=B16_484-2,ID=B16_499-2,ID=EL4_29_2	NA	NA
Gbe1	chr16	70313949	70569716	+	5	2.41546	1.08e-05	0.000168678	5 [3,2]	0 [0,0]	1	ID=B16_464-2,ID=B16_502-3,ID=B16_474-3,ID=B16_451-3,ID=B16_462-3	NA	NA
Nav2	chr7	48959097	49606821	+	16	7.72947	1.11e-05	0.000173021	16 [9,7]	0 [0,0]	0.946025	ID=B16_463-1,ID=EL4_18_2,ID=B16_502-3,ID=B16_460-1,ID=B16_474-3,ID=B16_497-1,ID=EL4_55-2,ID=B16PD1_531_2,ID=B16PD1_532_1,ID=B16_489-1,ID=B16_499-1,ID=B16_462-4,ID=B16_484-4,ID=B16_484-1,ID=EL4PD1_117-1,ID=B16_491-3	NA	NA
Sox14	chr9	99874106	99876170	-	3	1.44928	1.13e-05	0.000176782	0 [0,0]	3 [1,2]	1	ID=B16_474-3,ID=EL4PD1_115-3,ID=EL4_62-1	NA	NA
Plscr4	chr9	92457373	92492456	+	12	5.7971	1.14e-05	0.000177819	8 [4,4]	4 [0,4]	1	ID=B16_463-1,ID=EL4_18_2,ID=B16_460-1,ID=B16PD1_533_1,ID=B16PD1_537_4,ID=B16PD1_537_2,ID=B16_474-4,ID=EL4_27_3,ID=B16_489-1,ID=B16_462-4,ID=B16_484-1,ID=B16_499-2	NA	NA
Me1	chr9	86581371	86695953	-	25	12.0773	1.16e-05	0.000180006	24 [5,19]	1 [1,0]	1	ID=EL4_60-2,ID=B16_488-3,ID=B16_464-2,ID=B16_485-3,ID=B16_450-1,ID=B16_502-1,ID=B16_460-1,ID=B16PD1_533_2,ID=B16_474-3,ID=B16_474-4,ID=B16_525-1,ID=B16_485-4,ID=B16_489-1,ID=B16_450-3,ID=B16_499-1,ID=B16_451-5,ID=B16_462-4,ID=EL4PD1_152-2,ID=EL4_62-1,ID=B16_474-1,ID=B16_484-4,ID=B16_484-1,ID=B16_499-2,ID=B16_491-3,ID=B16_474-2	NA	NA
Syne1	chr10	5020917	5550678	-	20	9.66184	1.17e-05	0.000180839	20 [12,8]	0 [0,0]	1	ID=EL4_28_4,ID=EL4_28_1,ID=EL4_28_2,ID=EL4_28_3,ID=B16_464-1,ID=EL4_18_2,ID=EL4_22_3,ID=B16PD1_537_2,ID=B16_485-2,ID=B16_474-3,ID=B16_474-4,ID=EL4_19_2,ID=EL4_32_2,ID=B16_489-1,ID=B16_450-3,ID=B16_449-3,ID=EL4_70-2,ID=EL4_65-1,ID=EL4_29_2,ID=B16_491-3	NA	NA
1110037F02Rik	chr4	11485958	11550684	+	17	8.21256	1.19e-05	0.000183455	17 [7,10]	0 [0,0]	1	ID=B16_463-1,ID=EL4_28_2,ID=B16_464-2,ID=B16_464-1,ID=B16_485-3,ID=B16_450-1,ID=B16_502-3,ID=EL4_49-1,ID=B16_460-1,ID=EL4_22_3,ID=B16_474-3,ID=B16_497-1,ID=B16_450-3,ID=B16_451-5,ID=B16_451-3,ID=B16_462-4,ID=B16_484-2	NA	NA
Dpp10	chr1	123321471	124045559	-	44	21.256	1.21e-05	0.000186741	44 [28,16]	0 [0,0]	0.999495	ID=B16_463-1,ID=B16PD1_534_1,ID=B16_455-2,ID=B16_464-2,ID=B16_464-1,ID=B16_485-1,ID=B16_487-4,ID=B16_487-2,ID=B16_498-2,ID=B16_498-1,ID=LLC_171-2,ID=B16_502-3,ID=B16_502-1,ID=B16_460-1,ID=EL4_45-1,ID=EL4_22_3,ID=B16PD1_537_2,ID=B16_485-2,ID=B16PD1_161-4,ID=B16_474-3,ID=B16_497-1,ID=EL4_59-1,ID=B16_486-3,ID=EL4PD1_115-2,ID=B16_485-4,ID=EL4_39-4,ID=EL4_67-2,ID=EL4_64-5,ID=B16_521-1,ID=EL4_36_4,ID=E…	NA	NA
Olfr898	chr9	38348411	38352919	+	5	2.41546	1.22e-05	0.000187455	2 [1,1]	3 [3,0]	1	ID=B16_464-2,ID=B16_487-2,ID=B16_474-3,ID=B16_489-1,ID=B16_491-3	NA	NA
Vps8	chr16	21423118	21644680	+	35	16.9082	1.23e-05	0.000188838	35 [35,0]	0 [0,0]	0.769629	ID=B16_468-4,ID=B16_463-1,ID=B16_488-3,ID=B16_464-2,ID=B16_464-1,ID=B16_456-4,ID=B16_485-1,ID=B16_487-4,ID=B16_485-3,ID=B16_450-1,ID=B16_498-2,ID=B16_502-3,ID=B16_460-1,ID=B16_474-4,ID=B16_474-5,ID=B16_497-2,ID=B16_485-4,ID=B16_454-3,ID=B16_517-1,ID=B16_489-1,ID=B16_449-3,ID=B16_499-1,ID=B16_451-5,ID=B16_453-2,ID=B16_518-2,ID=B16_518-1,ID=B16_461-1,ID=B16_462-3,ID=B16_484-1,ID=B16_484-2,ID=B16_52…	NA	NA
Grin2a	chr16	9567898	9994923	-	10	4.83092	1.23e-05	0.000188838	10 [7,3]	0 [0,0]	1	ID=B16_464-2,ID=B16_464-1,ID=B16_485-3,ID=B16_502-3,ID=EL4_70-2,ID=B16_499-1,ID=B16_451-5,ID=B16_462-4,ID=B16_484-2,ID=B16_491-3	NA	NA
Phex	chrX	157162075	157415286	-	4	1.93237	1.25e-05	0.000191278	4 [1,3]	0 [0,0]	1	ID=B16_485-3,ID=EL4_22_3,ID=B16_489-1,ID=B16_518-1	NA	NA
Bckdhb	chr9	83925145	84124239	+	35	16.9082	1.26e-05	0.000192547	35 [16,19]	0 [0,0]	0.997477	ID=B16_463-1,ID=B16_488-3,ID=B16_464-2,ID=EL4PD1_116-3,ID=B16_485-1,ID=B16_485-3,ID=B16_450-1,ID=B16_519-3,ID=B16_502-3,ID=B16_502-1,ID=EL4_49-1,ID=B16_460-1,ID=EL4_32_1,ID=B16_485-2,ID=B16_474-3,ID=B16_474-4,ID=B16_474-5,ID=B16_497-2,ID=EL4_27_3,ID=B16_486-3,ID=B16_485-4,ID=EL4_64-1,ID=B16_489-1,ID=B16_450-3,ID=B16_499-1,ID=EL4_24_1,ID=B16_462-4,ID=EL4_62-1,ID=B16_474-1,ID=B16_484-1,ID=B16_484-2…	NA	NA
Arhgap26	chr18	38676718	39110534	+	9	4.34783	1.31e-05	0.000199125	9 [6,3]	0 [0,0]	0.934928	ID=EL4_26_4,ID=B16_487-4,ID=EL4_18_2,ID=B16_502-3,ID=B16_474-3,ID=EL4_25_3,ID=EL4PD1_157-2,ID=B16_489-1,ID=B16_462-4	NA	NA
Malrd1	chr2	15526479	16255555	+	46	22.2222	1.33e-05	0.000201207	45 [28,17]	1 [0,1]	0.99944	ID=B16_463-1,ID=B16PD1_534_3,ID=B16_3-4,ID=EL4_28_4,ID=EL4_28_3,ID=B16_488-3,ID=B16_101NT-3,ID=B16_464-2,ID=B16_464-1,ID=B16_487-4,ID=B16_487-2,ID=LLC_173-3,ID=B16_498-1,ID=EL4_18_2,ID=B16_502-3,ID=B16_460-1,ID=EL4PD1_104-1,ID=B16_12-3,ID=B16_485-2,ID=B16_16-1,ID=B16_474-3,ID=B16_474-4,ID=B16_16-4,ID=EL4_19_2,ID=B16_497-2,ID=B16_486-3,ID=B16_525-2,ID=EL4_64-1,ID=EL4_36_3,ID=EL4_36_2,ID=B16_2-2,ID…	NA	NA
Olfr975	chr9	39948131	39952046	-	5	2.41546	1.33e-05	0.000201207	2 [1,1]	3 [3,0]	1	ID=B16_488-3,ID=B16_464-2,ID=EL4PD1_116-3,ID=B16_474-4,ID=B16_462-4	NA	NA
Stc2	chr11	31357307	31370074	-	5	2.41546	1.33e-05	0.000201207	0 [0,0]	5 [0,5]	1	ID=B16_485-1,ID=B16_450-1,ID=B16_449-3,ID=B16_484-4,ID=B16_499-2	NA	NA
Ncbp1	chr4	46138613	46172403	+	11	5.31401	1.34e-05	0.000202616	11 [4,7]	0 [0,0]	1	ID=EL4PD1_116-3,ID=B16_487-2,ID=B16_474-4,ID=B16_486-3,ID=EL4_52-5,ID=B16_499-1,ID=B16_451-5,ID=B16_462-4,ID=EL4PD1_152-2,ID=B16_474-1,ID=B16_484-1	NA	NA
Bre	chr5	31697684	32084962	+	11	5.31401	1.44e-05	0.000216301	11 [4,7]	0 [0,0]	1	ID=EL4_60-2,ID=B16_464-1,ID=B16_487-4,ID=B16_498-1,ID=B16_474-3,ID=B16_497-1,ID=B16_489-1,ID=B16_451-3,ID=B16_462-4,ID=B16_499-2,ID=B16_491-3	NA	NA
Cask	chrX	13517080	13846578	-	11	5.31401	1.45e-05	0.000216475	11 [9,2]	0 [0,0]	1	ID=B16_463-1,ID=B16_488-3,ID=B16_464-2,ID=B16_502-3,ID=EL4_34_5,ID=B16_499-1,ID=B16_462-4,ID=EL4_44-2,ID=B16_474-1,ID=B16_524-2,ID=EL4_54-2	NA	NA
Epha7	chr4	28813131	28967499	+	35	16.9082	1.47e-05	0.000219291	34 [18,16]	1 [0,1]	0.974637	ID=B16_488-3,ID=B16_101NT-3,ID=B16_464-2,ID=B16_464-1,ID=EL4PD1_116-3,ID=B16_485-3,ID=EL4PD1_114-3,ID=B16_450-1,ID=B16_498-2,ID=B16_502-3,ID=EL4_49-1,ID=B16_460-1,ID=B16_485-2,ID=B16_474-3,ID=B16_474-4,ID=B16_497-1,ID=B16_497-2,ID=EL4_59-1,ID=B16_485-4,ID=EL4_52-5,ID=B16_489-1,ID=B16_450-3,ID=B16_451-5,ID=B16_451-3,ID=B16_461-1,ID=B16_462-4,ID=B16_17-3,ID=EL4_47-1,ID=EL4_62-1,ID=B16_474-1,ID=B16_…	NA	NA
Loxl3	chr6	83034173	83052562	+	6	2.89855	1.52e-05	0.000226073	6 [2,4]	0 [0,0]	1	ID=B16_498-1,ID=B16_502-1,ID=B16_497-2,ID=B16_517-1,ID=B16_518-2,ID=B16_484-2	NA	NA
Nf1	chr11	79339825	79581612	+	4	1.93237	1.55e-05	0.00022977	4 [3,1]	0 [0,0]	1	ID=EL4_22_3,ID=B16_451-3,ID=B16_462-4,ID=B16_484-2	NA	NA
Atg10	chr13	90935349	91223987	-	6	2.89855	1.57e-05	0.000232297	6 [4,2]	0 [0,0]	1	ID=B16_485-4,ID=EL4_25_3,ID=B16_499-1,ID=B16_461-1,ID=B16_475-2,ID=B16_520-1	NA	NA
Vwa8	chr14	78849178	79202310	+	8	3.86473	1.57e-05	0.000232565	8 [3,5]	0 [0,0]	1	ID=B16_474-4,ID=EL4_36_2,ID=B16_489-1,ID=B16_450-3,ID=B16_451-5,ID=B16_462-4,ID=B16_491-3,ID=B16_491-2	NA	NA
Adarb2	chr13	8202913	8768747	+	23	11.1111	1.57e-05	0.000232664	23 [13,10]	0 [0,0]	0.997974	ID=EL4_26_4,ID=B16_464-2,ID=B16_464-1,ID=B16_485-1,ID=B16_487-4,ID=B16_485-3,ID=B16_498-2,ID=B16_485-2,ID=B16_474-4,ID=B16_474-5,ID=EL4PD1_113-1,ID=B16PD1_531_1,ID=EL4_64-5,ID=EL4_70-3,ID=B16_499-1,ID=EL4_24_1,ID=B16_462-4,ID=LLC_170-1,ID=B16_484-4,ID=B16_484-1,ID=B16_484-2,ID=B16_499-2,ID=B16_515-1	NA	NA
Ak1	chr2	32621758	32635058	+	5	2.41546	1.61e-05	0.00023731	5 [2,3]	0 [0,0]	1	ID=EL4_28_1,ID=EL4_26_4,ID=EL4_18_2,ID=EL4_32_1,ID=B16PD1_537_1	NA	NA
Abca1	chr4	53030787	53159895	-	23	11.1111	1.7e-05	0.000250398	22 [12,10]	1 [0,1]	1	ID=B16_463-1,ID=EL4_28_4,ID=EL4_60-2,ID=B16_488-3,ID=B16_464-2,ID=EL4PD1_116-3,ID=B16_485-1,ID=B16_485-3,ID=B16_450-1,ID=B16_502-3,ID=EL4_45-1,ID=B16_474-3,ID=B16_474-4,ID=B16_474-5,ID=B16_486-3,ID=B16_485-4,ID=B16_489-1,ID=B16_450-3,ID=B16_522-1,ID=B16_451-5,ID=B16_475-2,ID=B16_462-4,ID=B16_484-4	NA	NA
Olfr861-ps1	chr9	19875510	19876639	+	4	1.93237	1.72e-05	0.000252167	0 [0,0]	4 [3,1]	1	ID=B16_474-3,ID=B16_489-1,ID=B16_462-4,ID=EL4_62-1	NA	NA
Rsrc1	chr3	66981390	67356559	+	15	7.24638	1.73e-05	0.000253812	15 [8,7]	0 [0,0]	1	ID=B16PD1_534_1,ID=EL4_28_2,ID=EL4_26_4,ID=B16_464-2,ID=B16_464-1,ID=EL4_18_2,ID=B16_460-1,ID=EL4_32_1,ID=B16_474-3,ID=EL4PD1_113-1,ID=EL4_38_3,ID=B16_489-1,ID=B16_462-4,ID=B16_499-2,ID=EL4_29_2	NA	NA
Cdkn2a	chr4	89274541	89294653	-	8	3.86473	1.77e-05	0.000259322	6 [3,3]	2 [2,0]	1	ID=B16_464-1,ID=B16_485-1,ID=B16_450-1,ID=EL4PD1_149-4,ID=EL4_36_3,ID=B16_489-1,ID=B16_474-1,ID=EL4PD1_152-1	predicted cancer driver	human T-ALL driver
Tmtc2	chr10	105187663	105574435	-	13	6.28019	1.8e-05	0.000262584	13 [7,6]	0 [0,0]	1	ID=B16_463-1,ID=B16_464-2,ID=B16_464-1,ID=B16_460-1,ID=B16_474-5,ID=EL4PD1_113-2,ID=EL4_33_2,ID=B16_499-1,ID=B16_451-3,ID=EL4_62-1,ID=B16_474-1,ID=B16_484-4,ID=EL4_54-2	NA	NA
Robo2	chr16	73892306	74410989	-	28	13.5266	1.84e-05	0.000268761	28 [12,16]	0 [0,0]	1	ID=B16_488-3,ID=EL4_26_4,ID=B16_464-1,ID=B16_485-3,ID=EL4PD1_114-3,ID=B16_450-1,ID=EL4_18_2,ID=B16_502-3,ID=B16_460-1,ID=EL4_45-1,ID=B16_474-3,ID=B16_474-4,ID=B16_474-5,ID=B16_486-3,ID=B16PD1_531_1,ID=B16_521-2,ID=B16_521-1,ID=B16_489-1,ID=B16_450-3,ID=B16_499-1,ID=B16_451-5,ID=B16_453-2,ID=B16_451-3,ID=EL4_47-1,ID=EL4PD1_152-2,ID=B16_499-2,ID=B16_491-3,ID=B16_516-2	NA	NA
Pak3	chrX	143518591	143797792	+	7	3.38164	1.89e-05	0.000274692	7 [3,4]	0 [0,0]	1	ID=B16_464-1,ID=B16_498-2,ID=B16_474-4,ID=B16PD1_532_2,ID=EL4_36_3,ID=B16_489-1,ID=B16_499-2	NA	NA
Slc26a7	chr4	14502430	14621805	-	26	12.5604	1.9e-05	0.0002751	26 [16,10]	0 [1,-1]	1	ID=B16_488-3,ID=B16_464-2,ID=B16_485-3,ID=B16_498-2,ID=B16_519-3,ID=B16_502-3,ID=B16_460-1,ID=EL4_46-2,ID=B16_485-2,ID=B16PD1_161-4,ID=B16_474-3,ID=B16_474-4,ID=EL4PD1_114-1,ID=EL4PD1_157-2,ID=B16_489-1,ID=B16_450-3,ID=EL4_70-3,ID=B16_451-3,ID=B16_462-4,ID=EL4PD1_152-2,ID=B16_484-4,ID=B16_484-1,ID=B16_484-2,ID=B16_499-2,ID=B16_491-3,ID=B16_491-2	NA	NA
AC167250.1	chr9	36254660	36263066	+	7	3.38164	1.98e-05	0.000285442	3 [3,0]	4 [1,3]	1	ID=B16_464-2,ID=EL4_49-1,ID=B16_460-1,ID=B16_474-3,ID=EL4_59-1,ID=EL4_64-1,ID=LLC_169-2	NA	NA
Arhgef10l	chr4	140514485	140666012	-	19	9.17874	2.02e-05	0.000290755	19 [9,10]	0 [0,0]	1	ID=EL4_28_4,ID=B16_464-2,ID=B16_450-1,ID=EL4_18_2,ID=B16_502-3,ID=EL4_22_3,ID=B16PD1_537_4,ID=B16PD1_537_2,ID=B16_474-4,ID=B16_497-2,ID=EL4_27_3,ID=EL4_32_3,ID=EL4_32_2,ID=B16_485-4,ID=EL4_25_3,ID=B16_451-3,ID=B16_474-1,ID=B16_484-1,ID=EL4_29_2	NA	NA
Ncald	chr15	37366175	37792433	-	10	4.83092	2.03e-05	0.000291963	10 [5,5]	0 [0,0]	1	ID=B16_464-1,ID=B16PD1_533_3,ID=B16_474-4,ID=B16_497-1,ID=B16_486-3,ID=EL4_67-2,ID=EL4_64-2,ID=B16_499-1,ID=B16_518-1,ID=B16_474-1	NA	NA
Agfg1	chr1	82839483	82901182	+	17	8.21256	2.06e-05	0.000295316	17 [6,11]	0 [0,0]	0.964038	ID=B16_463-1,ID=B16PD1_534_2,ID=B16_455-1,ID=B16_464-2,ID=B16_464-1,ID=B16_498-1,ID=B16_502-3,ID=EL4_45-1,ID=EL4_37_2,ID=EL4_67-1,ID=EL4_67-2,ID=EL4_64-2,ID=EL4_36_3,ID=B16_489-1,ID=B16_449-4,ID=B16_499-1,ID=B16_451-3	NA	NA
Lpar1	chr4	58435255	58553628	-	23	11.1111	2.18e-05	0.000312247	22 [10,12]	1 [0,1]	0.967084	ID=B16_3-4,ID=B16_488-3,ID=B16_464-2,ID=B16_502-3,ID=B16_502-1,ID=B16_460-1,ID=B16_485-2,ID=B16_474-4,ID=B16_474-5,ID=B16_497-2,ID=B16_489-1,ID=B16_1-1,ID=B16_450-3,ID=B16_451-5,ID=B16_451-3,ID=B16_475-2,ID=B16_462-4,ID=EL4_47-2,ID=B16_474-1,ID=B16_484-2,ID=B16_499-2,ID=B16_491-3,ID=B16_474-2	NA	NA
Cylc2	chr4	51216678	51230272	+	8	3.86473	2.19e-05	0.000313757	5 [4,1]	3 [0,3]	1	ID=B16_450-1,ID=B16_460-1,ID=B16_485-2,ID=B16_474-4,ID=B16_489-1,ID=B16_450-3,ID=B16_499-2,ID=B16_491-2	NA	NA
Igsf21	chr4	140026846	140246784	-	25	12.0773	2.22e-05	0.000316743	25 [15,10]	0 [0,0]	0.997709	ID=B16_488-3,ID=EL4_63-1,ID=B16_464-2,ID=B16_487-4,ID=B16_485-3,ID=B16_450-1,ID=B16_498-1,ID=B16_502-3,ID=B16_474-3,ID=B16_474-4,ID=EL4_27_3,ID=EL4_48-4,ID=B16_521-2,ID=B16_489-1,ID=B16_451-5,ID=B16_475-1,ID=B16_462-4,ID=EL4PD1_152-2,ID=EL4_62-1,ID=B16_474-1,ID=B16_484-2,ID=EL4_54-2,ID=B16_499-2,ID=B16_491-3,ID=B16_474-2	NA	NA
Nav3	chr10	109899103	110456204	-	29	14.0097	2.32e-05	0.000329274	29 [18,11]	0 [0,0]	0.918442	ID=B16_468-4,ID=B16_463-1,ID=B16_488-3,ID=B16_464-2,ID=B16_464-1,ID=B16_487-4,ID=B16_487-2,ID=B16_498-2,ID=B16_498-1,ID=B16_502-3,ID=B16_502-1,ID=B16_460-1,ID=B16_485-2,ID=B16_474-3,ID=B16_486-3,ID=EL4PD1_157-2,ID=B16_517-1,ID=B16_489-1,ID=B16_450-3,ID=B16_449-4,ID=B16_499-1,ID=B16_451-5,ID=B16_462-4,ID=EL4_47-2,ID=EL4_47-1,ID=B16_515-2,ID=B16_491-3,ID=B16_516-2,ID=B16_491-2	NA	NA
Akirin2	chr4	34550937	34566908	+	8	3.86473	2.34e-05	0.000330921	7 [3,4]	1 [0,1]	1	ID=B16PD1_534_1,ID=B16_464-2,ID=B16_498-1,ID=B16_474-3,ID=B16_474-4,ID=B16_497-1,ID=B16_450-3,ID=EL4_62-1	NA	NA
Drg1	chr11	3187360	3252685	-	16	7.72947	2.35e-05	0.000332853	16 [10,6]	0 [0,0]	1	ID=B16_463-1,ID=B16_455-2,ID=B16_488-3,ID=B16_464-1,ID=B16_450-1,ID=B16_502-3,ID=B16_460-1,ID=B16_474-3,ID=B16_486-3,ID=EL4PD1_150-2,ID=B16_485-4,ID=EL4_64-1,ID=B16_489-1,ID=B16_453-2,ID=B16_462-4,ID=B16_474-1	NA	NA
Robo1	chr16	72663149	73046095	+	13	6.28019	2.41e-05	0.000340353	13 [5,8]	0 [0,0]	0.957097	ID=B16_463-1,ID=B16_488-3,ID=B16_464-2,ID=B16_464-1,ID=B16_460-1,ID=B16_474-4,ID=B16_489-1,ID=B16_451-5,ID=B16_451-3,ID=B16_462-4,ID=EL4PD1_152-2,ID=B16_499-2,ID=B16_491-3	NA	NA
Trpc5	chrX	144381671	144688180	-	8	3.86473	2.48e-05	0.000350064	8 [4,4]	0 [0,0]	1	ID=B16_450-1,ID=EL4_49-1,ID=EL4_45-1,ID=B16_474-3,ID=B16_450-3,ID=B16_484-1,ID=EL4PD1_118-1,ID=B16_491-3	NA	NA
2210408I21Rik	chr13	77135540	77613291	+	22	10.628	2.58e-05	0.000363408	22 [14,8]	0 [0,0]	1	ID=EL4PD1_116-2,ID=B16PD1_534_3,ID=B16PD1_534_2,ID=B16_464-2,ID=B16_464-1,ID=B16_487-2,ID=EL4_18_2,ID=B16_502-3,ID=B16_474-3,ID=B16_474-4,ID=B16_474-5,ID=B16_497-1,ID=EL4_27_3,ID=EL4_59-1,ID=B16_486-3,ID=EL4_64-5,ID=B16PD1_532_2,ID=B16_450-3,ID=B16_451-3,ID=B16_462-4,ID=EL4_62-1,ID=B16_484-2	NA	NA
Cryab	chr9	50751325	50756636	+	4	1.93237	2.75e-05	0.000385235	1 [1,0]	3 [1,2]	1	ID=B16PD1_537_1,ID=EL4_19_2,ID=EL4_24_1,ID=B16_499-2	NA	NA
Vcp	chr4	42979963	43000507	-	8	3.86473	2.84e-05	0.000397379	8 [4,4]	0 [0,0]	1	ID=B16_463-1,ID=B16_488-3,ID=B16_464-2,ID=B16_474-3,ID=B16_474-5,ID=B16_489-1,ID=B16_474-1,ID=B16_499-2	NA	NA
Pde11a	chr2	75989912	76338774	-	8	3.86473	2.85e-05	0.000398635	8 [3,5]	0 [0,0]	1	ID=B16_464-2,ID=B16_485-1,ID=B16_487-4,ID=B16_498-1,ID=B16_502-3,ID=B16_486-3,ID=B16_451-3,ID=B16_5-2	NA	NA
Cdh19	chr1	110888326	110977363	-	25	12.0773	2.87e-05	0.000400694	25 [17,8]	0 [0,0]	0.983599	ID=B16_463-1,ID=B16_3-4,ID=B16_455-2,ID=B16_455-1,ID=B16_464-2,ID=B16_464-1,ID=B16_456-4,ID=B16_498-1,ID=B16_4-2,ID=EL4_22_3,ID=B16_12-3,ID=B16_16-2,ID=B16_16-1,ID=B16_16-4,ID=B16_525-2,ID=EL4_67-2,ID=B16_454-3,ID=B16_2-2,ID=B16_1-2,ID=B16_489-1,ID=B16_499-1,ID=EL4_24_1,ID=B16_451-4,ID=B16_499-2,ID=B16_515-1	NA	NA
AC154630.1	chr9	36089920	36092359	-	4	1.93237	2.9e-05	0.000403732	2 [0,2]	2 [0,2]	1	ID=B16_464-2,ID=B16_502-3,ID=B16_474-4,ID=B16_491-3	NA	NA
Dennd1a	chr2	37798991	38287375	-	18	8.69565	2.97e-05	0.000412389	18 [10,8]	0 [0,0]	1	ID=EL4_60-2,ID=B16_464-2,ID=B16_464-1,ID=B16_487-4,ID=B16_485-3,ID=EL4_32_1,ID=B16_474-3,ID=B16_474-4,ID=EL4_32_3,ID=B16_489-1,ID=B16_450-3,ID=B16_499-1,ID=B16_451-5,ID=B16_451-3,ID=B16_462-4,ID=EL4_44-2,ID=EL4_62-1,ID=B16_484-1	NA	NA
Plxna4	chr6	32144268	32588192	-	10	4.83092	3.01e-05	0.000417709	9 [3,6]	1 [1,0]	1	ID=B16_464-1,ID=B16_489-1,ID=B16_499-1,ID=B16_461-1,ID=B16_462-4,ID=EL4_47-1,ID=EL4PD1_152-2,ID=EL4_72-3,ID=EL4_54-2,ID=B16_491-2	NA	NA
Col27a1	chr4	63215435	63334991	+	17	8.21256	3.07e-05	0.000423403	17 [10,7]	0 [0,0]	1	ID=B16_488-3,ID=EL4_63-1,ID=B16_485-1,ID=B16_502-1,ID=B16_460-1,ID=B16_474-4,ID=B16_497-1,ID=EL4PD1_153-3,ID=B16_485-4,ID=EL4PD1_154-1,ID=B16_489-1,ID=B16_451-5,ID=B16_462-4,ID=B16_469-1,ID=EL4_54-2,ID=B16_499-2,ID=EL4PD1_152-1	NA	NA
Uhmk1	chr1	170193420	170215397	-	9	4.34783	3.06e-05	0.000423403	9 [4,5]	0 [0,0]	1	ID=B16_464-1,ID=EL4PD1_116-3,ID=B16_485-1,ID=EL4PD1_113-1,ID=B16_485-4,ID=B16PD1_531_1,ID=EL4_67-2,ID=EL4_36_3,ID=EL4PD1_118-1	NA	NA
Nhs	chrX	161833296	162159730	-	8	3.86473	3.07e-05	0.000423403	8 [4,4]	0 [0,0]	1	ID=B16_463-1,ID=B16_464-2,ID=B16_474-3,ID=EL4PD1_150-2,ID=EL4PD1_153-3,ID=B16PD1_531_2,ID=EL4_64-1,ID=B16_499-2	NA	NA
Myo1d	chr11	80482126	80780025	-	5	2.41546	3.07e-05	0.000423403	5 [3,2]	0 [0,0]	1	ID=B16_498-1,ID=EL4_22_3,ID=B16_499-1,ID=B16_451-5,ID=B16_462-4	NA	NA
Gabrb3	chr7	57419692	57828798	+	15	7.24638	3.09e-05	0.000425281	15 [8,7]	0 [0,0]	1	ID=B16PD1_534_3,ID=B16_464-2,ID=B16_464-1,ID=B16_498-2,ID=B16_498-1,ID=B16_460-1,ID=EL4_22_3,ID=B16_474-3,ID=B16_474-4,ID=EL4_67-2,ID=B16_449-4,ID=B16_451-3,ID=EL4_62-1,ID=B16_499-2,ID=B16_491-3	NA	NA
Mup-ps2	chr4	60155274	60157966	+	4	1.93237	3.14e-05	0.000430167	0 [0,0]	4 [1,3]	1	ID=B16_474-4,ID=B16_489-1,ID=B16_462-4,ID=B16_484-1	NA	NA
Igfbp2	chr1	72824503	72852474	+	8	3.86473	3.17e-05	0.000434475	8 [3,5]	0 [0,0]	1	ID=B16_463-1,ID=B16_464-1,ID=B16_486-3,ID=B16_489-1,ID=B16_499-1,ID=B16_462-4,ID=EL4PD1_118-1,ID=B16_499-2	NA	NA
Ice2	chr9	69397906	69433122	+	12	5.7971	3.23e-05	0.000441	10 [3,7]	2 [0,2]	1	ID=EL4PD1_116-2,ID=EL4_63-1,ID=B16_464-2,ID=B16_502-3,ID=B16PD1_161-4,ID=B16_474-4,ID=B16_486-3,ID=EL4_55-2,ID=EL4PD1_153-3,ID=EL4_38_3,ID=B16_453-2,ID=B16_462-4	NA	NA
Spock1	chr13	57421195	57908314	-	12	5.7971	3.37e-05	0.000459693	12 [5,7]	0 [0,0]	0.999602	ID=B16_463-1,ID=B16_464-1,ID=B16_487-2,ID=B16_460-1,ID=B16_474-4,ID=EL4_59-1,ID=B16_486-3,ID=B16_451-3,ID=B16_462-3,ID=B16_462-4,ID=B16_491-3,ID=B16_474-2	NA	NA
Tcf4	chr18	69344489	69689079	+	8	3.86473	3.44e-05	0.000468379	7 [3,4]	1 [0,1]	1	ID=B16_464-1,ID=B16PD1_161-4,ID=B16_486-3,ID=EL4PD1_157-2,ID=B16_449-4,ID=B16_499-1,ID=B16_484-2,ID=B16_499-2	NA	NA
Mup-ps4	chr4	60437362	60440064	+	4	1.93237	3.57e-05	0.000485116	2 [0,2]	2 [0,2]	1	ID=B16_463-1,ID=B16_474-4,ID=B16_474-5,ID=B16_450-3	NA	NA
AC154699.1	chr9	18298833	18300651	-	4	1.93237	3.66e-05	0.00049692	0 [0,0]	4 [2,2]	1	ID=B16_497-1,ID=EL4_59-1,ID=EL4PD1_105-2,ID=B16_474-1	NA	NA
L3mbtl4	chr17	68273797	68777961	+	20	9.66184	3.8e-05	0.000513384	20 [14,6]	0 [0,0]	1	ID=B16_463-1,ID=B16_464-1,ID=B16_487-4,ID=LLC_172-2,ID=B16_502-3,ID=B16_485-2,ID=B16_474-3,ID=B16_474-5,ID=EL4_36_3,ID=B16_499-1,ID=B16_451-3,ID=B16_462-4,ID=LLC_174-1,ID=EL4_62-1,ID=B16_474-1,ID=B16_499-2,ID=EL4_29_2,ID=B16_515-1,ID=B16_491-3,ID=B16_491-2	NA	NA
Cntln	chr4	84884309	85131921	+	45	21.7391	3.81e-05	0.000514059	45 [29,16]	0 [0,0]	0.978607	ID=EL4_60-2,ID=B16_488-3,ID=EL4_63-1,ID=B16_464-2,ID=B16_464-1,ID=EL4_60-1,ID=B16_487-2,ID=B16_450-1,ID=B16_498-2,ID=B16_4-2,ID=B16_502-3,ID=B16_460-1,ID=B16_485-2,ID=B16_474-3,ID=B16_474-4,ID=B16_474-5,ID=B16_497-2,ID=EL4PD1_115-3,ID=B16_485-4,ID=B16PD1_531_2,ID=EL4_67-3,ID=EL4PD1_156-3,ID=B16_2-2,ID=B16_517-1,ID=B16_489-1,ID=B16_450-3,ID=EL4_70-3,ID=B16_13-3,ID=B16_499-1,ID=B16_451-5,ID=B16_451…	NA	NA
Cdkal1	chr13	29191746	29855647	-	30	14.4928	3.82e-05	0.000514686	30 [23,7]	0 [0,0]	1	ID=EL4_41-1,ID=B16_488-3,ID=B16_464-2,ID=B16_464-1,ID=EL4PD1_116-3,ID=B16_487-4,ID=B16_485-3,ID=B16_487-2,ID=B16_450-1,ID=B16_502-3,ID=B16_474-3,ID=B16_474-4,ID=B16_486-3,ID=EL4_39-4,ID=B16_2-2,ID=B16_489-1,ID=B16_449-4,ID=B16_13-3,ID=B16_499-1,ID=B16_451-5,ID=B16_451-3,ID=B16_475-2,ID=B16_462-4,ID=EL4PD1_104-3,ID=EL4_65-1,ID=EL4_62-1,ID=B16_484-1,ID=B16_484-2,ID=B16_491-3,ID=B16_491-2	NA	NA
CT009696.2	chr9	41419051	41419482	+	3	1.44928	3.97e-05	0.000533932	0 [0,0]	3 [0,3]	1	ID=B16_498-2,ID=EL4PD1_115-3,ID=B16_491-3	NA	NA
Nol4	chr18	22693634	23041653	-	13	6.28019	4.23e-05	0.000568172	13 [5,8]	0 [0,0]	1	ID=B16_463-1,ID=B16_464-1,ID=B16_498-2,ID=B16_474-3,ID=B16_474-4,ID=EL4_36_2,ID=B16_489-1,ID=B16_499-1,ID=EL4_24_1,ID=B16_462-4,ID=B16_484-2,ID=EL4_72-3,ID=EL4PD1_118-1	NA	NA
Rad51b	chr12	79297282	79814690	+	20	9.66184	4.38e-05	0.000587816	20 [16,4]	0 [0,0]	0.929011	ID=B16_463-1,ID=B16_488-3,ID=B16_464-1,ID=B16_487-4,ID=LLC_173-3,ID=EL4_68-1,ID=B16_498-1,ID=EL4_45-1,ID=B16PD1_537_2,ID=B16_474-3,ID=EL4PD1_113-1,ID=EL4_67-3,ID=EL4PD1_157-2,ID=EL4_70-2,ID=B16_499-1,ID=B16_484-4,ID=EL4PD1_119-1,ID=B16_484-2,ID=EL4PD1_118-1,ID=B16_520-1	NA	NA
Ncam2	chr16	81200697	81624285	+	24	11.5942	4.47e-05	0.000597278	24 [18,6]	0 [0,0]	0.977798	ID=B16_463-1,ID=EL4_60-2,ID=B16_464-2,ID=B16_464-1,ID=EL4_60-1,ID=B16_487-4,ID=B16_485-3,ID=B16_450-1,ID=B16_498-2,ID=B16_498-1,ID=B16_502-3,ID=B16_474-4,ID=EL4_32_3,ID=B16_486-3,ID=B16_485-4,ID=EL4_64-1,ID=B16_489-1,ID=B16_499-1,ID=EL4_65-1,ID=EL4_62-1,ID=LLC_170-1,ID=B16_484-2,ID=B16_499-2,ID=B16_491-3	NA	NA
Chst9	chr18	15451924	15760157	-	8	3.86473	4.46e-05	0.000597278	8 [2,6]	0 [0,0]	1	ID=EL4PD1_116-2,ID=B16_487-4,ID=B16_460-1,ID=B16_474-4,ID=EL4_64-1,ID=B16_450-3,ID=B16_499-1,ID=EL4_54-2	NA	NA
Dok6	chr18	89301082	89769528	-	25	12.0773	4.83e-05	0.000643989	25 [13,12]	0 [0,0]	0.973548	ID=EL4_41-1,ID=B16_463-1,ID=B16PD1_534_1,ID=B16_488-3,ID=EL4_26_4,ID=B16_464-2,ID=B16_464-1,ID=B16_487-4,ID=B16_498-1,ID=B16_502-3,ID=EL4_49-1,ID=B16PD1_533_1,ID=EL4_22_3,ID=B16_474-3,ID=B16_474-4,ID=B16_497-1,ID=EL4_48-4,ID=B16PD1_531_2,ID=EL4_36_3,ID=B16_489-1,ID=B16_499-1,ID=B16_451-5,ID=B16_462-4,ID=EL4_62-1,ID=B16_484-2	NA	NA
Kazn	chr4	142102390	142210206	-	16	7.72947	4.84e-05	0.000644193	16 [9,7]	0 [0,0]	0.963349	ID=B16_464-2,ID=B16_487-4,ID=B16_485-3,ID=B16_498-2,ID=B16_502-3,ID=B16_460-1,ID=B16_474-4,ID=B16_489-1,ID=B16_450-3,ID=B16_451-5,ID=B16_451-3,ID=EL4_62-1,ID=B16_474-1,ID=B16_484-1,ID=B16_491-3,ID=B16_474-2	NA	NA
Cngb3	chr4	19280850	19510623	+	41	19.8068	4.92e-05	0.000653827	41 [19,22]	0 [0,0]	0.974853	ID=B16_463-1,ID=B16_488-3,ID=EL4_63-1,ID=B16_464-2,ID=B16_464-1,ID=B16_485-1,ID=B16_485-3,ID=B16_487-2,ID=B16_450-1,ID=B16_498-1,ID=B16_519-3,ID=B16_502-3,ID=EL4_49-1,ID=B16_460-1,ID=EL4_22_3,ID=B16_474-3,ID=B16_474-4,ID=B16_497-1,ID=EL4_32_3,ID=EL4PD1_114-1,ID=EL4_34_5,ID=B16_486-3,ID=EL4_33_2,ID=EL4_32_2,ID=B16_485-4,ID=EL4_64-1,ID=B16_489-1,ID=B16_450-3,ID=B16_499-1,ID=EL4_24_1,ID=B16_451-5,ID…	NA	NA
Mbd5	chr2	48949523	49316972	+	16	7.72947	4.93e-05	0.000654228	16 [5,11]	0 [0,0]	1	ID=B16_463-1,ID=B16_464-1,ID=B16_487-4,ID=B16_485-3,ID=B16_519-3,ID=B16_502-3,ID=B16_474-3,ID=B16_474-4,ID=EL4_55-2,ID=EL4_36_3,ID=B16_489-1,ID=B16_499-1,ID=B16_462-4,ID=EL4_47-1,ID=EL4_62-1,ID=B16_474-2	NA	NA
Grin2b	chr6	135713233	136173125	-	14	6.76329	5.18e-05	0.000686189	13 [8,5]	1 [1,0]	1	ID=B16_463-1,ID=EL4_28_4,ID=B16_487-4,ID=B16_487-2,ID=B16_502-3,ID=B16_485-2,ID=B16_474-3,ID=B16_497-2,ID=B16_486-3,ID=EL4_32_2,ID=EL4_24_1,ID=B16_462-4,ID=B16_499-2,ID=B16_491-2	NA	NA
Magi3	chr3	104013259	104220374	-	4	1.93237	5.51e-05	0.000729213	4 [2,2]	0 [0,0]	1	ID=B16_487-2,ID=B16_474-3,ID=B16_499-1,ID=EL4_65-1	NA	NA
Raver2	chr4	101068983	101152370	+	17	8.21256	5.56e-05	0.000733886	17 [10,7]	0 [0,0]	0.999886	ID=B16_101NT-3,ID=B16_464-2,ID=B16_485-3,ID=EL4PD1_149-4,ID=B16_474-3,ID=EL4PD1_114-1,ID=B16_485-4,ID=B16_489-1,ID=B16_450-3,ID=B16_451-5,ID=B16_451-3,ID=B16_462-4,ID=B16PD1_163-3,ID=B16_474-1,ID=LLC_170-1,ID=B16_499-2,ID=B16_491-3	NA	NA
Frmd4b	chr6	97286867	97617541	-	6	2.89855	5.6e-05	0.000736152	6 [3,3]	0 [0,0]	1	ID=B16_463-1,ID=B16_464-2,ID=EL4PD1_114-3,ID=B16_460-1,ID=B16_474-4,ID=EL4PD1_157-3	NA	NA
Ascc3	chr10	50592669	50851485	+	9	4.34783	5.62e-05	0.00073717	9 [4,5]	0 [0,0]	0.916966	ID=B16_464-1,ID=B16_460-1,ID=EL4PD1_104-1,ID=B16_474-4,ID=EL4_64-1,ID=B16_450-3,ID=B16_462-4,ID=B16_499-2,ID=B16_491-3	NA	NA
Mpp7	chr18	7347962	7626863	-	6	2.89855	5.62e-05	0.00073717	6 [3,3]	0 [0,0]	1	ID=B16_488-3,ID=B16_474-3,ID=EL4PD1_150-2,ID=B16_451-5,ID=B16_499-2,ID=B16_491-3	NA	NA
Xrcc4	chr13	89774027	90089523	-	12	5.7971	5.69e-05	0.000745227	12 [4,8]	0 [0,0]	0.999356	ID=B16_463-1,ID=B16_464-2,ID=B16_487-4,ID=B16_498-1,ID=EL4_18_2,ID=EL4_22_3,ID=B16_474-3,ID=B16_474-4,ID=B16_497-1,ID=EL4_36_3,ID=B16_462-4,ID=EL4_47-1	NA	NA
Olfr922	chr9	38814614	38819195	+	5	2.41546	5.73e-05	0.000748458	4 [1,3]	1 [0,1]	1	ID=B16_502-3,ID=B16_474-3,ID=B16_497-1,ID=B16_486-3,ID=B16_462-4	NA	NA
Hmgn3	chr9	83109948	83146685	-	11	5.31401	5.83e-05	0.000757912	11 [3,8]	0 [0,0]	1	ID=B16_488-3,ID=B16_464-2,ID=EL4PD1_156-2,ID=B16_502-3,ID=EL4_49-1,ID=B16_474-3,ID=B16_474-4,ID=EL4_59-1,ID=EL4_64-1,ID=B16_462-4,ID=B16_484-1	NA	NA
Acss3	chr10	106933517	107123583	-	3	1.44928	5.84e-05	0.000758883	3 [0,3]	0 [0,0]	1	ID=B16_450-1,ID=B16_474-4,ID=B16_485-4	NA	NA
Fau-ps2	chr11	3196454	3196824	-	3	1.44928	6e-05	0.000778356	0 [0,0]	3 [3,0]	1	ID=B16_474-3,ID=B16_485-4,ID=B16_474-1	NA	NA
Hspe1-ps6	chr4	96072424	96072706	-	3	1.44928	6.22e-05	0.000805873	0 [0,0]	3 [2,1]	1	ID=B16_488-3,ID=B16_474-4,ID=B16_474-2	NA	NA
Schip1	chr3	68064802	68626464	+	24	11.5942	6.28e-05	0.000812285	24 [13,11]	0 [0,0]	0.969357	ID=B16_463-1,ID=B16_455-2,ID=B16_488-3,ID=B16_101NT-3,ID=B16_464-1,ID=EL4PD1_116-3,ID=B16_487-4,ID=B16_487-2,ID=B16_498-2,ID=B16_12-3,ID=B16PD1_537_1,ID=B16_474-3,ID=B16_2-2,ID=B16_517-1,ID=B16_489-1,ID=B16_13-1,ID=B16_451-5,ID=B16_462-4,ID=EL4_52-2,ID=B16_17-1,ID=EL4_62-1,ID=B16_484-4,ID=EL4PD1_119-1,ID=LLC_167-1	NA	NA
Otud7a	chr7	63444751	63759028	+	7	3.38164	6.44e-05	0.000829357	7 [7,0]	0 [0,0]	1	ID=LLC_173-3,ID=B16_474-3,ID=B16_474-4,ID=EL4_32_3,ID=B16_485-4,ID=EL4_36_2,ID=B16_489-1	NA	NA
Bloc1s4	chr5	36747378	36748650	-	3	1.44928	6.45e-05	0.000829357	0 [0,0]	3 [0,3]	1	ID=LLC_173-3,ID=LLC_172-2,ID=EL4_52-2	NA	NA
1110065P20Rik	chr4	124849490	124851196	-	3	1.44928	6.68e-05	0.000858296	0 [0,0]	3 [0,3]	1	ID=B16_464-2,ID=B16_474-3,ID=B16_499-1	NA	NA
Pramel1	chr4	143394428	143400160	+	4	1.93237	6.72e-05	0.000860668	4 [0,4]	0 [0,0]	1	ID=B16_464-2,ID=B16_498-1,ID=B16_474-4,ID=B16_450-3	NA	NA
Zfp385b	chr2	77411100	77816816	-	14	6.76329	6.87e-05	0.000877879	14 [4,10]	0 [0,0]	0.961603	ID=B16_464-1,ID=B16_485-1,ID=B16_487-4,ID=LLC_168-1,ID=EL4PD1_149-4,ID=B16_474-3,ID=B16_474-4,ID=B16_499-1,ID=LLC_174-3,ID=B16_474-1,ID=B16_484-1,ID=EL4_54-2,ID=B16_491-3,ID=B16_474-2	NA	NA
Faxc	chr4	21931357	21996839	+	15	7.24638	6.9e-05	0.000880854	15 [9,6]	0 [0,0]	0.968363	ID=EL4PD1_116-2,ID=B16_464-2,ID=B16_485-3,ID=B16_502-3,ID=B16_485-2,ID=B16_474-3,ID=B16_474-4,ID=B16_497-1,ID=EL4PD1_115-3,ID=EL4PD1_118-2,ID=B16_474-1,ID=EL4PD1_117-3,ID=EL4PD1_117-1,ID=B16_499-2,ID=B16_491-3	NA	NA
Ccnc	chr4	21727726	21759922	+	11	5.31401	6.97e-05	0.000887708	11 [7,4]	0 [0,0]	0.999125	ID=B16_463-1,ID=B16_488-3,ID=EL4PD1_116-3,ID=B16_487-4,ID=B16_460-1,ID=B16_474-3,ID=B16_497-1,ID=B16_450-3,ID=B16_449-4,ID=B16_462-4,ID=B16_484-4	NA	NA
Adk	chr14	21052574	21448568	+	16	7.72947	7.12e-05	0.000904599	16 [6,10]	0 [0,0]	0.952406	ID=B16_464-2,ID=B16_464-1,ID=B16_487-2,ID=B16_498-1,ID=B16_474-4,ID=B16_497-2,ID=EL4_34_5,ID=EL4_67-2,ID=B16_489-1,ID=B16_499-1,ID=EL4_44-2,ID=EL4_62-1,ID=B16_484-1,ID=EL4PD1_118-1,ID=B16_515-1,ID=B16_516-2	NA	NA
Slc8a1	chr17	81388691	81649607	-	6	2.89855	7.26e-05	0.000922274	6 [5,1]	0 [0,0]	1	ID=B16_464-2,ID=B16_487-4,ID=B16_474-3,ID=B16_486-3,ID=B16_489-1,ID=B16_491-2	NA	NA
Tnni3k	chr3	154786291	155055407	-	5	2.41546	7.29e-05	0.000924058	5 [4,1]	0 [0,0]	1	ID=EL4PD1_116-2,ID=B16_474-3,ID=B16_486-3,ID=B16_462-4,ID=B16_491-3	NA	NA
Epha5	chr5	84054761	84416921	-	19	9.17874	7.45e-05	0.000941258	19 [12,7]	0 [0,0]	1	ID=B16_463-1,ID=B16_488-3,ID=B16_464-1,ID=B16_498-1,ID=B16_460-1,ID=B16_474-3,ID=B16_474-4,ID=B16_497-2,ID=B16_517-1,ID=B16_489-1,ID=B16_522-2,ID=B16_451-5,ID=B16_475-2,ID=B16_462-4,ID=B16PD1_163-2,ID=B16_484-1,ID=B16_499-2,ID=B16_491-3,ID=B16_491-2	NA	NA
Vav3	chr3	109340653	109685698	+	11	5.31401	7.63e-05	0.000963401	11 [3,8]	0 [0,0]	1	ID=B16_488-3,ID=B16_474-3,ID=B16_497-1,ID=EL4_25_3,ID=B16_499-1,ID=B16_451-3,ID=B16_462-4,ID=EL4_62-1,ID=B16_474-1,ID=B16_499-2,ID=B16_491-3	NA	NA
Rpl31-ps23	chr8	35132995	35133532	-	3	1.44928	7.69e-05	0.000968453	0 [0,0]	3 [0,3]	1	ID=B16_464-2,ID=B16_464-1,ID=B16_499-1	NA	NA
Tmem132d	chr5	127781630	128433077	-	24	11.5942	7.73e-05	0.000971116	24 [10,14]	0 [0,0]	1	ID=B16_463-1,ID=B16_101NT-3,ID=B16_464-1,ID=B16_485-1,ID=B16_498-1,ID=B16_460-1,ID=B16_474-4,ID=B16_497-1,ID=EL4PD1_114-1,ID=EL4_55-2,ID=B16_525-2,ID=B16_521-1,ID=B16_1-2,ID=B16_489-1,ID=B16_450-3,ID=B16_13-1,ID=EL4_44-2,ID=EL4_52-2,ID=B16_17-3,ID=B16_474-1,ID=EL4_54-2,ID=B16_499-2,ID=B16_515-1,ID=B16_491-3	NA	NA
Zfp697	chr3	98382461	98753812	+	10	4.83092	7.82e-05	0.000981298	10 [5,5]	0 [0,0]	1	ID=B16_463-1,ID=B16PD1_537_2,ID=B16_474-4,ID=EL4_36_4,ID=B16_461-1,ID=B16_462-4,ID=B16_484-1,ID=EL4PD1_118-1,ID=B16_499-2,ID=B16_520-2	NA	NA
Arhgap6	chrX	168795099	169304435	+	26	12.5604	7.97e-05	0.000997669	26 [16,10]	0 [0,0]	0.96554	ID=B16PD1_534_3,ID=EL4_28_2,ID=B16_488-3,ID=B16_464-2,ID=B16_464-1,ID=B16_485-1,ID=B16_498-2,ID=EL4_18_2,ID=EL4_32_1,ID=B16PD1_537_2,ID=B16_485-2,ID=B16_474-4,ID=EL4_19_2,ID=EL4_27_3,ID=EL4_32_3,ID=EL4_59-1,ID=EL4_67-1,ID=EL4_64-1,ID=B16_449-4,ID=B16_499-1,ID=B16_475-1,ID=B16_462-4,ID=EL4_47-2,ID=EL4_47-1,ID=B16_491-3,ID=B16_474-2	NA	NA
AC160016.1	chr9	69599307	69599754	-	3	1.44928	7.96e-05	0.000997669	0 [0,0]	3 [2,1]	1	ID=B16_464-1,ID=B16_474-1,ID=B16_484-1	NA	NA
Sgcd	chr11	46896253	47578965	-	38	18.3575	8.3e-05	0.00103369	35 [21,14]	3 [0,3]	0.973404	ID=B16PD1_534_3,ID=EL4_28_1,ID=B16_488-3,ID=EL4_26_4,ID=B16_101NT-3,ID=B16_464-2,ID=B16_464-1,ID=B16_456-4,ID=B16_485-1,ID=B16_498-2,ID=B16_498-1,ID=B16_502-3,ID=B16_460-1,ID=EL4_45-1,ID=B16_474-3,ID=B16_474-5,ID=B16_497-1,ID=B16_486-3,ID=B16_485-4,ID=B16PD1_531_1,ID=EL4_64-1,ID=EL4_36_3,ID=EL4_36_2,ID=EL4_38_3,ID=B16_489-1,ID=B16_499-1,ID=EL4_24_1,ID=B16_451-5,ID=B16_451-3,ID=B16_462-3,ID=B16_46…	NA	NA
Dbnl	chr11	5788530	5800962	+	5	2.41546	8.55e-05	0.00106271	5 [0,5]	0 [0,0]	1	ID=EL4_28_1,ID=B16_464-2,ID=B16_498-1,ID=EL4_22_3,ID=EL4_19_2	NA	NA
Fbxl7	chr15	26543084	26895049	-	12	5.7971	8.62e-05	0.00107009	12 [8,4]	0 [0,0]	1	ID=EL4_28_3,ID=B16_464-2,ID=EL4_18_2,ID=B16_474-3,ID=B16_474-4,ID=EL4_64-1,ID=EL4_36_2,ID=EL4_38_3,ID=B16_489-1,ID=B16_499-1,ID=B16_484-1,ID=EL4_61-2	NA	NA
Zcchc7	chr4	44756568	44932203	+	36	17.3913	8.66e-05	0.00107288	35 [13,22]	1 [-1,2]	0.987479	ID=B16_463-1,ID=B16_488-3,ID=B16_464-2,ID=B16_464-1,ID=B16_456-4,ID=B16_485-3,ID=B16_450-1,ID=B16_498-2,ID=EL4_18_2,ID=B16_502-3,ID=B16_502-1,ID=B16_460-1,ID=EL4_22_3,ID=B16PD1_537_1,ID=B16_474-3,ID=B16_474-4,ID=B16_486-3,ID=EL4PD1_150-2,ID=B16_454-3,ID=B16_489-1,ID=B16_522-2,ID=B16_450-3,ID=B16_499-1,ID=B16_451-5,ID=B16_451-3,ID=B16_518-2,ID=B16_462-4,ID=LLC_174-1,ID=EL4_47-2,ID=B16_474-1,ID=LLC…	NA	NA
Pde1a	chr2	79834453	80128939	-	9	4.34783	8.68e-05	0.00107455	9 [3,6]	0 [0,0]	1	ID=B16_464-2,ID=B16_487-4,ID=B16_502-3,ID=B16_474-3,ID=B16_489-1,ID=B16_450-3,ID=B16_499-1,ID=B16_462-4,ID=B16_491-3	NA	NA
Ell	chr8	70539688	70592858	+	10	4.83092	9e-05	0.00111204	9 [1,8]	1 [1,0]	0.975621	ID=B16_4-2,ID=B16_12-3,ID=B16_16-1,ID=B16_489-1,ID=B16_13-3,ID=B16_453-2,ID=B16_5-2,ID=B16_14-1,ID=B16_451-4,ID=EL4_54-2	NA	NA
AC159896.1	chr9	36381685	36381899	+	3	1.44928	9.13e-05	0.00112371	0 [0,0]	3 [2,1]	1	ID=B16_455-2,ID=B16_485-4,ID=B16_17-1	NA	NA
Fut9	chr4	25609332	25800146	-	37	17.8744	9.36e-05	0.00115093	36 [15,21]	1 [0,1]	0.999964	ID=B16_463-1,ID=B16_488-3,ID=B16_464-2,ID=B16_464-1,ID=B16_485-1,ID=B16_487-4,ID=B16_485-3,ID=B16_502-3,ID=B16_502-1,ID=EL4_49-1,ID=B16_460-1,ID=B16_485-2,ID=B16_474-3,ID=B16_474-4,ID=B16_474-5,ID=B16_497-1,ID=EL4PD1_115-2,ID=EL4_64-1,ID=B16_489-1,ID=B16_450-3,ID=B16_449-4,ID=B16_451-3,ID=B16_475-1,ID=B16_475-2,ID=B16_462-4,ID=EL4_47-2,ID=EL4_62-1,ID=B16_474-1,ID=B16_484-4,ID=B16_484-1,ID=B16_484…	NA	NA
Ano4	chr10	89035091	89344645	-	9	4.34783	9.39e-05	0.00115293	8 [3,5]	1 [1,0]	0.917711	ID=B16_488-3,ID=B16_464-1,ID=LLC_172-2,ID=B16_474-4,ID=B16_485-4,ID=EL4_64-1,ID=B16_499-1,ID=EL4PD1_117-3,ID=B16_516-2	NA	NA
Fam172a	chr13	77708690	78166238	+	23	11.1111	9.53e-05	0.00116608	23 [12,11]	0 [0,0]	1	ID=B16_463-1,ID=B16_464-2,ID=B16_464-1,ID=B16_487-4,ID=B16_485-3,ID=B16_502-3,ID=B16_485-2,ID=B16_474-3,ID=B16_474-4,ID=EL4_32_3,ID=B16_485-4,ID=EL4_64-5,ID=EL4_64-1,ID=B16_489-1,ID=B16_450-3,ID=B16_499-1,ID=B16_462-3,ID=B16_462-4,ID=EL4_52-2,ID=B16_484-1,ID=EL4PD1_118-1,ID=EL4_29_2,ID=EL4PD1_152-1	NA	NA
Ofcc1	chr13	40001882	40288011	-	8	3.86473	9.68e-05	0.00118355	8 [4,4]	0 [0,0]	1	ID=B16_464-2,ID=B16_464-1,ID=B16_485-1,ID=B16_474-3,ID=B16_474-4,ID=B16_499-1,ID=B16_453-2,ID=B16_462-4	NA	NA
Col4a6	chrX	141165403	141474076	-	10	4.83092	9.87e-05	0.00120134	10 [3,7]	0 [0,0]	1	ID=B16_464-2,ID=B16_485-1,ID=EL4PD1_114-3,ID=EL4_49-1,ID=EL4_45-1,ID=B16_474-4,ID=EL4_55-2,ID=B16_485-4,ID=B16_2-2,ID=B16_522-1	NA	NA
Zfp978	chr4	147361311	147391004	+	10	4.83092	9.86e-05	0.00120134	9 [3,6]	1 [0,1]	1	ID=B16PD1_534_3,ID=B16_488-3,ID=B16_485-1,ID=EL4_49-1,ID=B16_474-3,ID=B16_474-4,ID=EL4PD1_118-2,ID=EL4_62-1,ID=B16_515-1,ID=EL4PD1_152-1	NA	NA
Plcb4	chr2	135659711	135983013	+	8	3.86473	9.89e-05	0.00120134	8 [5,3]	0 [0,0]	1	ID=B16_464-2,ID=B16_487-2,ID=B16_474-4,ID=EL4_55-2,ID=B16_449-4,ID=B16_462-4,ID=EL4_54-2,ID=B16_499-2	NA	NA
AC073945.2	chr9	39287813	39299548	-	7	3.38164	9.88e-05	0.00120134	2 [1,1]	5 [2,3]	1	ID=B16_464-2,ID=B16_502-3,ID=B16_485-2,ID=B16_474-3,ID=B16_474-4,ID=B16_462-4,ID=B16_499-2	NA	NA
Senp6	chr9	80066903	80144953	+	19	9.17874	0.000100331	0.00121654	19 [11,8]	0 [0,0]	0.971499	ID=EL4_41-1,ID=B16_488-3,ID=B16_464-2,ID=B16_487-2,ID=EL4PD1_114-3,ID=EL4_49-1,ID=B16_460-1,ID=B16_474-3,ID=EL4_19_2,ID=EL4PD1_115-3,ID=EL4_67-1,ID=EL4_64-1,ID=B16_489-1,ID=B16_451-5,ID=B16_462-4,ID=EL4_62-1,ID=B16_484-1,ID=EL4_61-2,ID=B16_491-3	NA	NA
Sorcs1	chr19	50143299	50678646	-	25	12.0773	0.000101734	0.00123186	25 [11,14]	0 [0,0]	1	ID=B16_463-1,ID=B16_488-3,ID=B16_485-1,ID=EL4_68-1,ID=B16_450-1,ID=LLC_171-2,ID=LLC_172-2,ID=B16_502-1,ID=B16_460-1,ID=B16PD1_533_1,ID=B16_485-2,ID=B16_474-3,ID=B16_474-4,ID=B16_497-1,ID=B16_486-3,ID=EL4_64-1,ID=B16_2-2,ID=B16_450-3,ID=B16_499-1,ID=B16_451-3,ID=B16_462-4,ID=B16_484-1,ID=EL4PD1_117-1,ID=B16_499-2,ID=B16_491-3	NA	NA
Olfr846	chr9	19357065	19364005	-	6	2.89855	0.000102091	0.00123451	3 [2,1]	3 [3,0]	1	ID=B16_488-3,ID=B16_460-1,ID=B16_474-3,ID=EL4_59-1,ID=B16_489-1,ID=B16_474-1	NA	NA
Cachd1	chr4	100776675	101029220	+	37	17.8744	0.000102657	0.00123968	37 [18,19]	0 [0,0]	1	ID=B16_468-4,ID=B16_463-1,ID=B16_488-3,ID=B16_101NT-3,ID=B16_464-2,ID=EL4PD1_116-3,ID=B16_487-2,ID=B16_450-1,ID=B16_498-2,ID=B16_498-1,ID=EL4_18_2,ID=B16_502-3,ID=B16_502-1,ID=B16_460-1,ID=B16_485-2,ID=B16_474-3,ID=B16_474-4,ID=B16_497-1,ID=B16_497-2,ID=EL4_32_3,ID=EL4_59-1,ID=EL4_32_2,ID=B16_485-4,ID=B16_489-1,ID=B16_450-3,ID=B16_449-3,ID=B16_449-4,ID=B16_499-1,ID=B16_462-4,ID=EL4_62-1,ID=B16_48…	NA	NA
Sfmbt2	chr2	10372436	10595241	+	3	1.44928	0.000103274	0.00124543	3 [3,0]	0 [0,0]	1	ID=B16_464-2,ID=B16_499-1,ID=B16_491-3	NA	NA
Olfr62	chr4	118658952	118668042	+	5	2.41546	0.000103489	0.00124634	3 [1,2]	2 [1,1]	1	ID=B16_463-1,ID=B16_474-5,ID=EL4PD1_150-2,ID=B16_474-1,ID=B16_491-3	NA	NA
Enox2	chrX	49009707	49288212	-	9	4.34783	0.00010415	0.00125253	9 [4,5]	0 [0,0]	1	ID=B16_464-2,ID=B16_464-1,ID=B16_502-3,ID=B16_502-1,ID=B16_485-2,ID=B16_474-3,ID=B16_489-1,ID=B16_499-1,ID=B16_474-1	NA	NA
Ifna5	chr4	88835525	88836094	+	3	1.44928	0.000104284	0.00125253	0 [0,0]	3 [0,3]	1	ID=EL4_63-1,ID=B16_474-5,ID=B16_484-2	NA	NA
Acnat2	chr4	49379840	49408151	-	9	4.34783	0.000106188	0.00127368	7 [4,3]	2 [1,1]	1	ID=B16_463-1,ID=B16_498-1,ID=B16_485-2,ID=B16_474-3,ID=B16_474-4,ID=EL4_67-2,ID=LLC_174-1,ID=B16_474-1,ID=B16_491-3	NA	NA
Efna5	chr17	62604184	62881317	-	6	2.89855	0.000106408	0.00127461	6 [3,3]	0 [0,0]	1	ID=B16_464-1,ID=B16_485-3,ID=B16_497-1,ID=EL4_55-2,ID=EL4PD1_152-2,ID=B16_491-3	NA	NA
Mroh2a	chr1	88227020	88262289	+	8	3.86473	0.000108678	0.00129831	4 [0,4]	4 [3,1]	1	ID=B16_488-3,ID=B16_464-1,ID=B16_474-4,ID=EL4_64-5,ID=B16_489-1,ID=B16_499-1,ID=B16_451-3,ID=EL4_65-1	NA	NA
Utrn	chr10	12383380	12869365	-	20	9.66184	0.000109016	0.00130061	20 [9,11]	0 [0,0]	0.999693	ID=B16_463-1,ID=EL4_60-2,ID=EL4PD1_116-1,ID=B16_464-1,ID=B16_487-4,ID=B16_487-2,ID=EL4PD1_114-3,ID=B16_502-3,ID=B16_460-1,ID=EL4_45-1,ID=B16_474-3,ID=B16_474-4,ID=EL4_59-1,ID=EL4PD1_115-3,ID=EL4_55-2,ID=B16_489-1,ID=B16_449-4,ID=B16_462-4,ID=LLC_170-1,ID=B16_491-3	NA	NA
Alg6	chr4	99715665	99763460	+	13	6.28019	0.000111112	0.00132384	13 [5,8]	0 [0,0]	0.981693	ID=B16_464-2,ID=B16_502-3,ID=B16_502-1,ID=B16PD1_533_1,ID=B16PD1_533_2,ID=B16_485-2,ID=B16_474-3,ID=B16_474-5,ID=EL4_34_5,ID=EL4_36_3,ID=EL4_36_2,ID=EL4_38_3,ID=B16_489-1	NA	NA
Cenpp	chr13	49464023	49652785	-	3	1.44928	0.00011278	0.00134191	3 [1,2]	0 [0,0]	1	ID=B16_498-1,ID=EL4_32_3,ID=EL4PD1_114-1	NA	NA
Slc2a13	chr15	91267696	91573261	-	8	3.86473	0.000113254	0.00134576	8 [6,2]	0 [0,0]	1	ID=B16_3-4,ID=B16_485-3,ID=B16_460-1,ID=B16_474-3,ID=B16_474-5,ID=EL4_59-1,ID=B16_485-4,ID=B16_450-3	NA	NA
Olfr976	chr9	39954257	39961133	-	5	2.41546	0.000113607	0.00134815	4 [3,1]	1 [0,1]	1	ID=B16_488-3,ID=B16_464-2,ID=EL4PD1_115-3,ID=B16_474-1,ID=EL4_72-3	NA	NA
Rgs6	chr12	82617499	83162056	+	19	9.17874	0.000115219	0.00136546	19 [10,9]	0 [0,0]	0.965706	ID=B16_463-1,ID=EL4_28_1,ID=B16_488-3,ID=B16_101NT-3,ID=B16_464-2,ID=B16_464-1,ID=B16_498-2,ID=B16_460-1,ID=B16_474-3,ID=EL4PD1_150-2,ID=B16_485-4,ID=EL4_67-2,ID=B16_2-2,ID=EL4PD1_157-1,ID=B16_499-1,ID=B16_462-4,ID=B16_499-2,ID=B16_491-3,ID=B16_474-2	NA	NA
Fam155a	chr8	9205902	9771161	-	25	12.0773	0.000116052	0.00137181	25 [11,14]	0 [0,0]	0.979042	ID=B16_463-1,ID=EL4_28_4,ID=B16_464-2,ID=B16_464-1,ID=B16_456-4,ID=B16_485-1,ID=B16_487-2,ID=B16_498-1,ID=B16_502-3,ID=B16PD1_537_2,ID=B16_474-3,ID=B16_474-4,ID=B16_474-5,ID=B16_485-4,ID=B16PD1_531_1,ID=EL4_36_2,ID=B16_489-1,ID=B16_449-4,ID=B16_499-1,ID=B16_451-3,ID=B16_462-4,ID=EL4PD1_117-3,ID=B16_484-2,ID=EL4_72-3,ID=B16_499-2	NA	NA
Kcnip1	chr11	33641180	33993152	-	6	2.89855	0.000116062	0.00137181	6 [2,4]	0 [0,0]	1	ID=EL4_41-1,ID=B16_464-1,ID=B16_460-1,ID=B16_474-3,ID=B16_474-4,ID=B16_499-2	NA	NA
Skint4	chr4	112072016	112167386	+	22	10.628	0.000118028	0.0013932	22 [15,7]	0 [0,0]	1	ID=B16_464-2,ID=B16_485-1,ID=B16_487-4,ID=B16_485-3,ID=B16_487-2,ID=LLC_172-2,ID=B16_502-3,ID=EL4_49-1,ID=B16_460-1,ID=B16_474-3,ID=B16_474-4,ID=B16_497-1,ID=B16_489-1,ID=B16_451-5,ID=B16_462-4,ID=EL4_62-1,ID=B16_474-1,ID=LLC_170-1,ID=B16_484-1,ID=B16_484-2,ID=B16_499-2,ID=B16_491-3	NA	NA
Vti1b	chr12	79156017	79172667	-	7	3.38164	0.00011941	0.00140394	7 [5,2]	0 [0,0]	1	ID=B16_463-1,ID=B16_464-1,ID=B16_498-1,ID=B16_489-1,ID=B16_499-1,ID=B16_451-3,ID=B16_475-1	NA	NA
F8	chrX	75172715	75382316	-	4	1.93237	0.000122706	0.00144078	4 [2,2]	0 [0,0]	1	ID=B16_450-1,ID=B16_502-3,ID=EL4_47-2,ID=B16_491-3	NA	NA
Mtap	chr4	89137122	89181081	+	11	5.31401	0.000124936	0.00146312	11 [5,6]	0 [0,0]	1	ID=EL4PD1_116-2,ID=B16_464-2,ID=B16_464-1,ID=B16_450-1,ID=B16_498-1,ID=B16_474-3,ID=B16_497-1,ID=B16_485-4,ID=B16_499-1,ID=B16_451-3,ID=B16_474-1	NA	NA
Erc1	chr6	119570796	119848150	-	8	3.86473	0.000124894	0.00146312	8 [5,3]	0 [0,0]	1	ID=B16_463-1,ID=B16_464-1,ID=B16_498-1,ID=B16_474-4,ID=B16_489-1,ID=B16_450-3,ID=B16_449-4,ID=EL4_65-1	NA	NA
Gtdc1	chr2	44575478	44927161	-	15	7.24638	0.000125159	0.0014638	15 [4,11]	0 [0,0]	1	ID=B16_464-2,ID=B16_464-1,ID=B16_485-1,ID=B16PD1_537_4,ID=B16_474-3,ID=B16_497-1,ID=EL4_67-2,ID=B16_451-3,ID=B16_462-4,ID=EL4_47-1,ID=EL4_62-1,ID=B16_474-1,ID=B16_484-1,ID=EL4_54-2,ID=B16_491-3	NA	NA
CAAA01090811.1	chr9	124369217	124369493	+	2	0.966184	0.000125819	0.00146959	0 [0,0]	2 [0,2]	1	ID=B16_497-1,ID=B16_462-4	NA	NA
Ntng1	chr3	109780046	110144011	-	14	6.76329	0.000126086	0.00147078	14 [8,6]	0 [0,0]	0.999773	ID=B16PD1_534_3,ID=B16_464-2,ID=B16_464-1,ID=B16_487-4,ID=B16_460-1,ID=B16_474-4,ID=B16_489-1,ID=B16_450-3,ID=B16_499-1,ID=B16_451-5,ID=B16_462-4,ID=B16_484-4,ID=B16_484-1,ID=EL4PD1_152-1	NA	NA
Cdh8	chr8	99024471	99416427	-	20	9.66184	0.000127417	0.00148437	20 [9,11]	0 [0,0]	1	ID=B16_463-1,ID=B16_464-2,ID=B16_487-4,ID=B16_485-3,ID=EL4_18_2,ID=B16_502-3,ID=B16_460-1,ID=EL4_45-1,ID=B16_474-3,ID=B16_474-4,ID=EL4_19_2,ID=B16_497-2,ID=EL4_33_2,ID=EL4_36_3,ID=B16_489-1,ID=B16_450-3,ID=B16_499-1,ID=B16_462-4,ID=B16_499-2,ID=EL4_61-2	NA	NA
Ush2a	chr1	188263034	188965041	+	35	16.9082	0.000130516	0.00151788	35 [23,12]	0 [0,0]	0.991086	ID=B16_463-1,ID=B16_488-3,ID=B16_464-2,ID=B16_464-1,ID=B16_456-4,ID=EL4PD1_156-2,ID=B16_485-1,ID=B16_487-4,ID=B16_485-3,ID=B16_450-1,ID=B16_498-2,ID=B16_498-1,ID=B16PD1_537_4,ID=B16_485-2,ID=B16_474-3,ID=B16_474-5,ID=B16_497-1,ID=EL4_34_5,ID=B16_486-3,ID=EL4PD1_115-2,ID=EL4_55-2,ID=EL4_67-2,ID=EL4_36_3,ID=B16_489-1,ID=B16_450-3,ID=EL4_70-3,ID=EL4_70-2,ID=B16_499-1,ID=B16_451-3,ID=EL4_65-1,ID=B16_…	NA	NA
Ndufaf4	chr4	24898083	24905001	+	5	2.41546	0.000140455	0.00162142	3 [1,2]	2 [0,2]	1	ID=B16_488-3,ID=B16_474-3,ID=B16_474-4,ID=EL4_48-4,ID=B16_489-1	NA	NA
Chordc1	chr9	18292125	18317442	+	10	4.83092	0.000141805	0.00163488	8 [3,5]	2 [0,2]	1	ID=B16_485-1,ID=B16_474-4,ID=B16_497-1,ID=EL4_59-1,ID=B16_450-3,ID=LLC_174-1,ID=EL4PD1_105-2,ID=EL4_62-1,ID=B16_474-1,ID=B16_499-2	NA	NA
Rbfox3	chr11	118491155	118911597	-	5	2.41546	0.000142213	0.00163747	5 [3,2]	0 [0,0]	1	ID=B16_487-4,ID=B16_497-1,ID=B16_451-3,ID=B16_499-2,ID=B16_491-3	NA	NA
Spata19	chr9	27396800	27401710	+	4	1.93237	0.000155344	0.00178406	0 [0,0]	4 [4,0]	1	ID=B16_487-2,ID=B16_474-3,ID=B16_484-1,ID=B16_491-3	NA	NA
Olfr907	chr9	38495810	38499882	+	5	2.41546	0.000158029	0.00181256	1 [1,0]	4 [2,2]	1	ID=B16_460-1,ID=B16_474-4,ID=B16_499-1,ID=B16_462-4,ID=B16_474-1	NA	NA
Trak2	chr1	58900449	58973430	-	16	7.72947	0.000158389	0.00181435	16 [7,9]	0 [0,0]	0.749193	ID=B16PD1_534_3,ID=B16_485-3,ID=B16_498-1,ID=LLC_172-2,ID=B16_460-1,ID=B16PD1_533_1,ID=B16PD1_537_1,ID=B16PD1_537_2,ID=EL4_34_5,ID=B16PD1_531_2,ID=B16_454-3,ID=EL4_36_3,ID=B16_1-1,ID=B16_499-1,ID=B16_475-1,ID=EL4_65-1	NA	NA
Med12l	chr3	59006487	59318682	+	9	4.34783	0.000158814	0.00181688	9 [3,6]	0 [0,0]	1	ID=EL4_26_4,ID=B16_464-2,ID=EL4_18_2,ID=B16_474-4,ID=EL4_36_3,ID=B16_462-4,ID=B16_474-1,ID=B16_484-2,ID=B16_499-2	NA	NA
Ano2	chr6	125690419	126040126	+	8	3.86473	0.000161641	0.00184685	8 [1,7]	0 [0,0]	1	ID=EL4_28_2,ID=B16_464-1,ID=B16_474-3,ID=EL4_67-2,ID=B16_489-1,ID=B16_450-3,ID=B16_518-2,ID=EL4_61-2	NA	NA
Bmpr1b	chr3	141840368	142169425	-	12	5.7971	0.000165979	0.00189399	12 [4,8]	0 [0,0]	1	ID=B16_463-1,ID=EL4_26_4,ID=B16_464-2,ID=B16_464-1,ID=B16_487-2,ID=B16_460-1,ID=B16_474-4,ID=B16_474-5,ID=B16_497-2,ID=B16_462-4,ID=B16_484-4,ID=B16_484-1	NA	NA
Pacrg	chr17	10403012	10840311	-	16	7.72947	0.000168752	0.00192317	16 [7,9]	0 [0,0]	1	ID=B16_488-3,ID=B16_464-2,ID=B16_464-1,ID=B16_498-1,ID=B16_460-1,ID=EL4_22_3,ID=B16PD1_537_2,ID=B16_485-2,ID=B16_474-3,ID=B16_474-4,ID=B16_474-5,ID=B16_449-3,ID=B16_499-1,ID=B16_451-3,ID=B16_462-4,ID=B16_484-1	NA	NA
Zfp541	chr7	16061814	16096334	+	9	4.34783	0.000169429	0.00192842	9 [1,8]	0 [0,0]	1	ID=EL4_41-1,ID=B16_464-1,ID=EL4_46-2,ID=EL4_52-5,ID=EL4_39-4,ID=EL4_48-1,ID=EL4_52-2,ID=EL4_54-3,ID=EL4_54-2	NA	NA
Atxn1	chr13	45549755	45964976	-	12	5.7971	0.000170558	0.0019386	12 [6,6]	0 [0,0]	0.999254	ID=B16_463-1,ID=B16_488-3,ID=B16_464-1,ID=B16_487-4,ID=B16_485-2,ID=B16_474-3,ID=EL4_55-2,ID=EL4_52-5,ID=B16_499-1,ID=B16_462-4,ID=EL4_54-2,ID=B16_491-3	NA	human T-ALL driver
Spata16	chr3	26637620	26983212	+	11	5.31401	0.000170759	0.0019386	11 [6,5]	0 [0,0]	0.976627	ID=B16_463-1,ID=EL4_28_1,ID=B16_464-2,ID=B16_450-1,ID=B16_498-1,ID=B16_502-3,ID=B16_460-1,ID=B16_474-3,ID=EL4_36_4,ID=B16_489-1,ID=B16_499-1	NA	NA
Kalrn	chr16	34049689	34573532	-	18	8.69565	0.000174994	0.00198416	18 [13,5]	0 [0,0]	0.999448	ID=B16_463-1,ID=B16_464-2,ID=B16_464-1,ID=B16_487-4,ID=B16_487-2,ID=B16_450-1,ID=B16_460-1,ID=B16_485-2,ID=B16_474-4,ID=B16_485-4,ID=B16PD1_531_1,ID=EL4_36_3,ID=B16_450-3,ID=B16_499-1,ID=B16_451-3,ID=B16_484-4,ID=B16_484-1,ID=B16_499-2	NA	NA
Ube2e2	chr14	18573577	18893776	-	10	4.83092	0.000179149	0.00202869	10 [8,2]	0 [0,0]	1	ID=B16_463-1,ID=B16_464-2,ID=B16_474-3,ID=EL4_19_2,ID=B16_486-3,ID=EL4_36_2,ID=B16_450-3,ID=B16_499-1,ID=B16_451-3,ID=B16_491-3	NA	NA
Tmc1	chr19	20783458	20954202	-	2	0.966184	0.000183616	0.00207663	2 [1,1]	0 [0,0]	1	ID=B16_464-2,ID=B16_474-3	NA	NA
Dock5	chr14	67751928	67933572	-	27	13.0435	0.000185953	0.0021004	27 [1,26]	0 [0,0]	0.880228	ID=B16_463-1,ID=B16_455-1,ID=B16_456-4,ID=B16_485-1,ID=B16_487-2,ID=B16_450-1,ID=B16_519-1,ID=B16_474-5,ID=B16_525-2,ID=B16_525-1,ID=B16_521-1,ID=B16_454-3,ID=B16_517-1,ID=B16_449-4,ID=B16_522-1,ID=B16_499-1,ID=B16_453-2,ID=B16_518-2,ID=B16_475-2,ID=B16_474-1,ID=B16_484-1,ID=B16_484-2,ID=B16_524-1,ID=B16_516-2,ID=B16_520-2,ID=B16_520-1,ID=B16_474-2	NA	NA
Kcnh8	chr17	52602709	52979194	+	16	7.72947	0.000186878	0.00210285	16 [7,9]	0 [0,0]	1	ID=B16_463-1,ID=B16_464-2,ID=B16_464-1,ID=B16_450-1,ID=B16_498-1,ID=EL4_37_2,ID=B16_474-3,ID=B16_474-4,ID=EL4_32_3,ID=EL4_34_5,ID=EL4_64-1,ID=B16_449-4,ID=B16_451-5,ID=B16_462-4,ID=EL4_65-1,ID=B16_491-2	NA	NA
Dock4	chr12	40445952	40846874	+	16	7.72947	0.000186878	0.00210285	16 [6,10]	0 [0,0]	0.952711	ID=B16_463-1,ID=B16_464-2,ID=B16_464-1,ID=B16_485-3,ID=EL4PD1_114-3,ID=B16_502-3,ID=B16_485-2,ID=B16_474-3,ID=B16_474-4,ID=EL4_64-5,ID=EL4_64-2,ID=B16_489-1,ID=B16_499-1,ID=B16_451-3,ID=B16_462-4,ID=B16_515-2	NA	NA
Prkce	chr17	86167785	86657919	+	13	6.28019	0.000186578	0.00210285	11 [9,2]	2 [-1,3]	0.896314	ID=B16_488-3,ID=B16_464-2,ID=B16_485-1,ID=B16_487-4,ID=B16_485-3,ID=B16_498-2,ID=B16_498-1,ID=B16_450-3,ID=B16_499-1,ID=B16_451-3,ID=B16_484-1,ID=B16_516-2,ID=B16_474-2	NA	NA
Rapgef4	chr2	71981240	72257474	+	5	2.41546	0.000187142	0.00210316	5 [0,5]	0 [0,0]	1	ID=B16_464-1,ID=B16_474-3,ID=B16_499-1,ID=B16_461-1,ID=B16_462-4	NA	NA
Ccdc7a	chr8	128736976	129065512	-	13	6.28019	0.000190502	0.00213286	13 [9,4]	0 [0,0]	1	ID=B16_463-1,ID=B16_487-2,ID=B16_498-2,ID=B16_502-3,ID=B16_460-1,ID=B16_474-4,ID=B16_486-3,ID=B16_489-1,ID=B16_499-1,ID=B16_475-1,ID=B16_462-4,ID=EL4_65-1,ID=LLC_170-1	NA	NA
Cfap61	chr2	145934814	146215039	+	5	2.41546	0.000192506	0.00215259	5 [1,4]	0 [0,0]	0.998757	ID=EL4_28_2,ID=B16_474-3,ID=B16_499-1,ID=B16_451-3,ID=B16_462-4	NA	NA
Gpr37	chr6	25665878	25689792	-	9	4.34783	0.000195312	0.00218123	9 [8,1]	0 [0,0]	1	ID=B16_463-1,ID=B16PD1_534_3,ID=B16PD1_534_2,ID=B16_497-1,ID=B16_489-1,ID=B16_499-1,ID=EL4_24_1,ID=B16_499-2,ID=B16_491-3	NA	NA
Wdpcp	chr11	21572235	21898989	+	12	5.7971	0.000197638	0.00220444	12 [6,6]	0 [0,0]	1	ID=B16_464-2,ID=B16_4-2,ID=B16_502-3,ID=B16_474-3,ID=B16_497-1,ID=B16_489-1,ID=B16_450-3,ID=B16_499-1,ID=B16_13-1,ID=B16_451-5,ID=B16_451-3,ID=B16_462-4	NA	NA
Shroom4	chrX	6399854	6633837	+	6	2.89855	0.000198265	0.00220867	6 [3,3]	0 [0,0]	1	ID=B16_463-1,ID=B16_488-3,ID=B16_487-2,ID=EL4PD1_114-3,ID=B16_502-3,ID=EL4_49-1	NA	NA
Spag16	chr1	69826988	70725132	+	65	31.401	0.000199463	0.00221924	65 [40,25]	0 [0,0]	0.994005	ID=B16_463-1,ID=EL4_28_1,ID=B16_488-3,ID=B16_464-2,ID=B16_464-1,ID=EL4PD1_116-3,ID=B16_485-1,ID=B16_487-4,ID=B16_487-2,ID=LLC_173-3,ID=B16_498-1,ID=EL4_18_2,ID=B16_502-3,ID=B16_502-1,ID=B16_460-1,ID=EL4_45-1,ID=B16PD1_533_1,ID=B16_485-2,ID=B16_474-3,ID=B16_474-4,ID=B16_497-1,ID=B16_486-3,ID=EL4PD1_115-3,ID=EL4_55-2,ID=EL4_32_2,ID=B16_525-2,ID=B16PD1_531_1,ID=EL4_67-1,ID=EL4_67-3,ID=EL4_67-2,ID=B1…	NA	NA
Gria3	chrX	41401304	41678601	+	9	4.34783	0.000200142	0.00222402	9 [6,3]	0 [0,0]	1	ID=B16_463-1,ID=B16_464-1,ID=B16_502-3,ID=EL4_32_1,ID=B16_474-3,ID=B16_450-3,ID=B16_451-5,ID=B16_515-2,ID=B16_515-1	NA	NA
Kcnn2	chr18	45269005	45686024	+	19	9.17874	0.000201784	0.00223948	19 [12,7]	0 [0,0]	0.968759	ID=B16PD1_534_3,ID=B16_488-3,ID=B16_464-2,ID=B16_464-1,ID=B16_485-1,ID=B16_485-3,ID=B16_487-2,ID=B16_498-1,ID=B16_460-1,ID=B16_474-3,ID=B16_474-4,ID=B16_497-2,ID=B16_489-1,ID=B16_499-1,ID=B16_475-2,ID=B16_462-4,ID=EL4PD1_152-2,ID=B16_499-2,ID=B16_491-3	NA	NA
Oprm1	chr10	6758593	7037546	+	8	3.86473	0.000204125	0.00225983	8 [6,2]	0 [0,0]	0.900101	ID=B16_463-1,ID=B16_460-1,ID=B16_489-1,ID=B16_450-3,ID=B16_499-1,ID=LLC_170-1,ID=EL4PD1_117-3,ID=B16_491-3	predicted cancer driver	human T-ALL driver
Homer3	chr8	70282827	70294361	+	4	1.93237	0.000204052	0.00225983	4 [2,2]	0 [0,0]	1	ID=B16_468-4,ID=B16_474-4,ID=B16_474-5,ID=B16_474-1	NA	NA
Oog4	chr4	143437164	143450324	-	6	2.89855	0.000204786	0.00226401	3 [2,1]	3 [1,2]	1	ID=B16_464-2,ID=B16_464-1,ID=EL4_36_3,ID=B16_462-4,ID=B16_474-1,ID=B16_499-2	NA	NA
Acoxl	chr2	127854628	128123873	+	5	2.41546	0.00020501	0.00226401	5 [4,1]	0 [0,0]	1	ID=B16_464-2,ID=B16_474-4,ID=B16_497-1,ID=B16_489-1,ID=B16_499-1	NA	NA
Kcnh5	chr12	74897220	75177332	-	9	4.34783	0.000209155	0.00230692	8 [4,4]	1 [0,1]	1	ID=B16_488-3,ID=B16_464-1,ID=B16_450-1,ID=B16_502-3,ID=B16_474-3,ID=EL4PD1_115-3,ID=B16_462-4,ID=EL4_65-1,ID=EL4PD1_117-3	NA	NA
Pdzd2	chr15	12443331	12739924	-	5	2.41546	0.000211217	0.0023259	5 [2,3]	0 [0,0]	1	ID=B16_464-2,ID=B16_474-4,ID=B16_489-1,ID=B16_499-1,ID=B16_491-3	NA	NA
Map3k7	chr4	31964097	32023467	+	15	7.24638	0.000211765	0.00232707	15 [8,7]	0 [0,0]	1	ID=B16_488-3,ID=B16_464-2,ID=B16_487-4,ID=B16_487-2,ID=B16_450-1,ID=B16_498-2,ID=B16_502-3,ID=B16_474-4,ID=B16_485-4,ID=B16_451-5,ID=B16_475-1,ID=B16_484-4,ID=EL4_54-2,ID=B16_499-2,ID=B16_491-2	NA	NA
CT030722.2	chr13	62151170	62151914	+	3	1.44928	0.000217539	0.00238464	3 [2,1]	0 [0,0]	1	ID=B16_499-1,ID=EL4_48-1,ID=EL4PD1_118-3	NA	NA
Shroom3	chr5	92683435	92965314	+	5	2.41546	0.000223468	0.00244662	5 [2,3]	0 [0,0]	1	ID=B16_488-3,ID=B16_464-1,ID=B16_498-1,ID=B16_474-4,ID=B16_489-1	NA	NA
Aqp7	chr4	41033074	41048139	-	5	2.41546	0.00022818	0.00249514	5 [4,1]	0 [0,0]	1	ID=EL4_28_4,ID=EL4_32_3,ID=EL4_25_3,ID=B16_462-4,ID=EL4_47-2	NA	NA
Mier1	chr4	103114395	103165754	+	14	6.76329	0.000229722	0.00250893	14 [8,6]	0 [0,0]	0.943573	ID=EL4PD1_116-2,ID=B16_463-1,ID=B16_488-3,ID=B16_464-2,ID=B16_464-1,ID=EL4_49-1,ID=B16_460-1,ID=B16_474-3,ID=B16_474-4,ID=B16_497-1,ID=EL4_27_3,ID=B16_462-4,ID=LLC_170-1,ID=B16_491-3	NA	NA
Gpr158	chr2	21367542	21830547	+	22	10.628	0.000231451	0.00252471	21 [8,13]	1 [0,1]	1	ID=B16_463-1,ID=B16_488-3,ID=EL4_26_4,ID=B16_464-2,ID=B16_464-1,ID=EL4PD1_114-3,ID=B16_498-1,ID=B16_460-1,ID=B16_474-4,ID=EL4_27_3,ID=B16_486-3,ID=EL4PD1_115-3,ID=B16_485-4,ID=B16PD1_531_1,ID=B16PD1_532_1,ID=B16_499-1,ID=EL4_24_1,ID=B16_453-2,ID=B16_451-3,ID=B16_462-4,ID=B16_499-2,ID=B16_515-1	NA	NA
Unc5c	chr3	141465216	141834924	+	17	8.21256	0.000236516	0.00257366	17 [7,10]	0 [0,0]	0.9999	ID=B16_463-1,ID=B16_464-2,ID=B16_464-1,ID=B16_487-2,ID=B16_498-1,ID=B16_474-4,ID=EL4_48-4,ID=EL4_59-1,ID=B16_485-4,ID=EL4_64-1,ID=EL4_36_2,ID=B16_449-4,ID=B16_499-1,ID=B16_451-3,ID=B16_462-4,ID=B16_499-2,ID=LLC_167-1	NA	NA
Hivep2	chr10	13966379	14151374	+	30	14.4928	0.000238822	0.00259559	30 [15,15]	0 [0,0]	0.881359	ID=B16_455-1,ID=B16_464-2,ID=B16_487-4,ID=B16_519-3,ID=B16_452-1,ID=B16_12-3,ID=B16_16-2,ID=B16_474-3,ID=B16_474-4,ID=B16_16-4,ID=B16_521-2,ID=B16_521-1,ID=B16_517-1,ID=B16_489-1,ID=B16_522-1,ID=B16_13-1,ID=B16_451-5,ID=B16_518-2,ID=B16_518-1,ID=B16_5-2,ID=B16_462-4,ID=B16_14-1,ID=B16_17-3,ID=B16_484-1,ID=B16_524-2,ID=B16_524-1,ID=B16_515-2,ID=B16_516-2,ID=B16_520-2,ID=B16_520-1	NA	NA
Vti1a	chr19	55316351	55626561	+	7	3.38164	0.000239767	0.00260268	7 [2,5]	0 [0,0]	1	ID=EL4PD1_156-2,ID=B16_485-3,ID=B16PD1_537_2,ID=B16_497-1,ID=EL4PD1_154-1,ID=B16_489-1,ID=EL4PD1_152-1	NA	NA
Trps1	chr15	50654752	50889691	-	8	3.86473	0.000241905	0.00261951	8 [2,6]	0 [0,0]	1	ID=EL4PD1_116-3,ID=B16_474-3,ID=B16_497-1,ID=B16_497-2,ID=B16_486-3,ID=EL4PD1_157-1,ID=B16_489-1,ID=B16_499-2	NA	NA
Zc3h12b	chrX	95711678	95924758	+	5	2.41546	0.000242575	0.00262358	5 [3,2]	0 [0,0]	1	ID=B16_498-1,ID=EL4_36_3,ID=B16_451-5,ID=B16_451-3,ID=B16_474-2	NA	NA
Camk1d	chr2	5293457	5714515	-	13	6.28019	0.000246731	0.00266234	13 [6,7]	0 [0,0]	1	ID=B16_463-1,ID=B16_464-1,ID=LLC_172-2,ID=EL4_49-1,ID=B16_460-1,ID=B16_474-3,ID=EL4_36_3,ID=B16_489-1,ID=B16_450-3,ID=B16_499-1,ID=B16_462-4,ID=LLC_170-1,ID=B16_491-3	NA	NA
Arhgap10	chr8	77250366	77517953	-	4	1.93237	0.000246756	0.00266234	4 [2,2]	0 [0,0]	1	ID=B16_460-1,ID=B16_474-3,ID=B16_485-4,ID=EL4_65-1	NA	NA
Sidt2	chr9	45937857	45955258	-	5	2.41546	0.000247558	0.00266775	5 [3,2]	0 [0,0]	1	ID=B16_455-1,ID=EL4_28_2,ID=B16_12-3,ID=B16PD1_537_4,ID=B16_515-1	NA	NA
Dscam	chr16	96592079	97170752	-	25	12.0773	0.000248007	0.00266937	25 [9,16]	0 [0,0]	0.985326	ID=B16_463-1,ID=B16_488-3,ID=B16_464-2,ID=B16_464-1,ID=B16_498-1,ID=B16_460-1,ID=EL4_22_3,ID=B16_16-2,ID=B16_474-3,ID=B16_474-4,ID=B16_474-5,ID=B16_497-1,ID=EL4_27_3,ID=B16_486-3,ID=EL4_64-5,ID=EL4PD1_156-4,ID=B16_489-1,ID=B16_450-3,ID=B16_499-1,ID=B16_451-5,ID=B16_462-4,ID=EL4_47-2,ID=B16_499-2,ID=EL4_29_2,ID=B16_491-2	NA	NA
Mup5	chr4	61831319	61835233	-	4	1.93237	0.000250492	0.00268962	1 [0,1]	3 [0,3]	1	ID=B16_502-3,ID=B16_474-3,ID=B16_489-1,ID=B16_474-1	NA	NA
Cubn	chr2	13276338	13491813	-	5	2.41546	0.000251708	0.00269618	5 [3,2]	0 [0,0]	0.801684	ID=B16_464-2,ID=EL4_64-5,ID=B16_489-1,ID=B16_499-1,ID=B16_484-2	NA	NA
Hspd1-ps4	chr4	106136111	106137778	-	3	1.44928	0.000257459	0.00274787	0 [0,0]	3 [2,1]	1	ID=B16_498-1,ID=B16_474-3,ID=B16_491-3	NA	NA
Ppfia2	chr10	106470346	106935952	+	28	13.5266	0.000258362	0.00275421	28 [13,15]	0 [0,0]	0.955735	ID=B16_463-1,ID=B16_464-2,ID=B16_464-1,ID=EL4PD1_116-3,ID=B16_485-3,ID=B16_498-1,ID=LLC_172-2,ID=B16_460-1,ID=B16PD1_533_3,ID=B16_474-3,ID=B16_474-4,ID=B16_497-1,ID=B16_497-2,ID=EL4_32_2,ID=EL4PD1_150-2,ID=B16_485-4,ID=B16_2-2,ID=B16_489-1,ID=B16_450-3,ID=B16_499-1,ID=B16_462-4,ID=B16PD1_160-2,ID=B16_484-4,ID=B16_484-1,ID=B16_524-1,ID=B16_499-2,ID=B16_491-3,ID=B16_491-2	NA	NA
Col25a1	chr3	130180891	130599877	+	17	8.21256	0.000258954	0.00275588	17 [12,5]	0 [0,0]	1	ID=B16PD1_534_2,ID=B16_464-2,ID=B16_464-1,ID=B16_487-4,ID=B16_485-3,ID=EL4PD1_114-3,ID=B16PD1_537_2,ID=B16_474-3,ID=B16_474-4,ID=B16_489-1,ID=B16_450-3,ID=B16_499-1,ID=B16_451-3,ID=EL4_47-2,ID=EL4_47-1,ID=B16_474-1,ID=B16_491-3	NA	NA
Tmem135	chr7	89156448	89404222	-	7	3.38164	0.000259137	0.00275588	7 [5,2]	0 [0,0]	1	ID=B16_464-2,ID=EL4_37_2,ID=B16_474-3,ID=B16_474-4,ID=B16_497-1,ID=B16_489-1,ID=B16_462-4	NA	NA
Fam19a2	chr10	123264076	123741204	+	24	11.5942	0.0002601	0.00276282	24 [12,12]	0 [0,0]	0.959889	ID=B16_463-1,ID=B16_488-3,ID=B16_101NT-3,ID=B16_464-1,ID=B16_485-1,ID=B16_487-4,ID=B16_498-2,ID=B16_12-3,ID=B16_485-2,ID=B16_16-3,ID=B16_474-3,ID=B16_474-5,ID=EL4_32_3,ID=B16_525-2,ID=EL4_36_3,ID=B16_489-1,ID=B16_1-1,ID=B16_499-1,ID=B16_451-5,ID=B16_475-1,ID=B16_462-4,ID=B16_484-1,ID=B16_484-2,ID=B16_491-3	NA	NA
Eqtn	chr4	94907267	94928843	-	8	3.86473	0.000262476	0.00278475	7 [1,6]	1 [1,0]	1	ID=B16_464-2,ID=B16_498-2,ID=B16_502-3,ID=B16_474-4,ID=B16_489-1,ID=B16_499-1,ID=B16_462-4,ID=B16_484-2	NA	NA
Glis3	chr19	28258851	28680077	-	14	6.76329	0.000264895	0.00279709	13 [4,9]	1 [1,0]	1	ID=B16_464-2,ID=B16_464-1,ID=B16_485-1,ID=B16_498-1,ID=B16_502-3,ID=B16_460-1,ID=B16_474-3,ID=EL4PD1_115-2,ID=B16_489-1,ID=B16_499-1,ID=B16_462-4,ID=EL4_54-2,ID=B16_499-2,ID=B16_491-3	NA	NA
Tubb4b-ps2	chr1	24594087	24595423	-	3	1.44928	0.000271993	0.00286525	0 [0,0]	3 [0,3]	1	ID=B16_488-3,ID=EL4_45-1,ID=B16_497-1	NA	NA
Hmgcll1	chr9	76014855	76136350	+	26	12.5604	0.000277464	0.00291599	26 [15,11]	0 [0,0]	0.999661	ID=EL4_60-2,ID=B16_488-3,ID=B16_464-2,ID=B16_485-3,ID=B16_498-2,ID=B16_502-3,ID=B16_460-1,ID=B16_474-3,ID=B16_474-4,ID=EL4PD1_114-1,ID=B16_485-4,ID=EL4_52-5,ID=EL4_64-2,ID=EL4_64-1,ID=B16_489-1,ID=B16_451-5,ID=B16_451-3,ID=B16_462-4,ID=EL4_65-1,ID=EL4_52-2,ID=B16_474-1,ID=B16_484-1,ID=B16_484-2,ID=B16_491-3,ID=B16_520-2,ID=B16_491-2	NA	NA
Map7d1	chr4	126232167	126256343	-	6	2.89855	0.000282022	0.00295344	6 [5,1]	0 [0,0]	0.925622	ID=EL4_32_1,ID=EL4_22_3,ID=B16PD1_537_4,ID=EL4_32_3,ID=EL4_62-1,ID=EL4_29_2	NA	NA
Sh3kbp1	chrX	159627272	159978069	+	12	5.7971	0.000282458	0.00295454	12 [7,5]	0 [0,0]	1	ID=B16_463-1,ID=B16_464-1,ID=B16_456-4,ID=B16_485-1,ID=B16_502-3,ID=B16_502-1,ID=B16_450-3,ID=B16_499-1,ID=B16_462-4,ID=LLC_174-1,ID=LLC_170-1,ID=B16_491-2	NA	NA
Pde7b	chr10	20398004	20725078	-	10	4.83092	0.000283359	0.00295702	10 [5,5]	0 [0,0]	1	ID=B16_464-2,ID=B16_464-1,ID=B16_450-1,ID=B16PD1_537_4,ID=B16_474-3,ID=B16_486-3,ID=B16_489-1,ID=B16_450-3,ID=B16_499-2,ID=B16_491-3	NA	NA
Eif2s1	chr12	78861819	78887010	+	9	4.34783	0.000283079	0.00295702	9 [5,4]	0 [0,0]	1	ID=B16_463-1,ID=B16_464-1,ID=B16_474-3,ID=EL4_55-2,ID=EL4PD1_113-1,ID=B16_450-3,ID=B16_499-1,ID=B16_462-4,ID=B16_499-2	NA	NA
Thrb	chr14	17660960	18038088	+	13	6.28019	0.000292887	0.00305288	13 [8,5]	0 [0,0]	0.953754	ID=EL4_63-1,ID=B16_464-2,ID=B16_464-1,ID=B16_487-2,ID=B16_502-3,ID=B16_460-1,ID=B16_474-4,ID=EL4_25_3,ID=EL4_70-2,ID=B16_499-1,ID=B16_13-1,ID=B16_462-4,ID=B16_499-2	NA	NA
Xpa	chr4	46155347	46196311	-	10	4.83092	0.00029417	0.00306267	10 [4,6]	0 [0,0]	1	ID=B16_464-1,ID=EL4PD1_116-3,ID=B16_487-2,ID=B16_474-4,ID=B16_486-3,ID=B16_489-1,ID=B16_499-1,ID=B16_462-4,ID=B16_474-1,ID=B16_499-2	NA	NA
Pgam2	chr11	5801640	5803733	-	3	1.44928	0.000295015	0.00306788	3 [3,0]	0 [0,0]	1	ID=EL4_22_3,ID=B16PD1_537_4,ID=B16PD1_537_2	NA	NA
Oxr1	chr15	41447482	41861045	+	20	9.66184	0.000298162	0.00309633	20 [11,9]	0 [0,0]	1	ID=EL4_28_4,ID=B16_464-1,ID=B16_485-3,ID=B16_498-1,ID=B16PD1_537_4,ID=B16_485-2,ID=B16_474-3,ID=B16_474-5,ID=B16_497-1,ID=EL4PD1_115-3,ID=EL4_36_2,ID=B16_489-1,ID=B16_449-4,ID=B16_499-1,ID=B16_451-5,ID=EL4_62-1,ID=LLC_170-1,ID=B16_484-4,ID=B16_484-1,ID=B16_499-2	NA	NA
Asb18	chr1	89950220	90014577	-	12	5.7971	0.000298793	0.00309633	10 [8,2]	2 [0,2]	1	ID=B16_463-1,ID=B16_464-1,ID=B16_498-2,ID=B16PD1_537_2,ID=EL4_55-2,ID=EL4_67-2,ID=EL4_25_3,ID=B16_1-2,ID=B16_489-1,ID=B16_499-1,ID=B16_461-1,ID=B16_499-2	NA	NA
Kcnab1	chr3	65109384	65378219	+	7	3.38164	0.000298775	0.00309633	7 [3,4]	0 [0,0]	1	ID=B16PD1_534_3,ID=B16_488-3,ID=LLC_171-2,ID=B16_497-1,ID=EL4_38_3,ID=B16_489-1,ID=B16_451-3	NA	NA
Tmem117	chr15	94629185	95096097	+	20	9.66184	0.000299698	0.0031021	19 [8,11]	1 [1,0]	0.999865	ID=B16_488-3,ID=B16_487-4,ID=B16_487-2,ID=B16_498-1,ID=B16_502-3,ID=B16_460-1,ID=B16_474-4,ID=EL4PD1_113-2,ID=EL4_55-2,ID=B16_450-3,ID=B16_499-1,ID=B16_451-5,ID=B16_475-2,ID=B16_462-4,ID=B16PD1_163-3,ID=EL4_62-1,ID=LLC_170-1,ID=B16_484-1,ID=EL4PD1_118-1,ID=B16_474-2	NA	NA
Fam189a1	chr7	64756091	65156570	-	12	5.7971	0.000307467	0.00317883	11 [9,2]	1 [1,0]	1	ID=B16_464-2,ID=B16_464-1,ID=B16_498-1,ID=B16_474-3,ID=B16_474-4,ID=EL4PD1_113-1,ID=B16_489-1,ID=B16_499-1,ID=B16_462-4,ID=LLC_174-1,ID=B16_499-2,ID=B16_491-3	NA	NA
Palld	chr8	61511433	61902669	-	14	6.76329	0.000309092	0.00319192	14 [5,9]	0 [0,0]	1	ID=EL4PD1_116-1,ID=B16_464-2,ID=B16_498-1,ID=EL4_18_2,ID=B16_502-3,ID=B16_460-1,ID=B16_474-3,ID=B16_474-4,ID=EL4PD1_115-2,ID=EL4PD1_150-2,ID=B16_489-1,ID=EL4_62-1,ID=EL4PD1_119-1,ID=B16_499-2	NA	NA
Creb5	chr6	53287270	53700376	+	13	6.28019	0.000313123	0.00322235	13 [10,3]	0 [0,0]	1	ID=B16_463-1,ID=B16_488-3,ID=B16_464-2,ID=B16_485-1,ID=B16_498-1,ID=EL4PD1_149-2,ID=B16PD1_533_3,ID=B16_485-2,ID=B16_474-4,ID=EL4_36_4,ID=B16_489-1,ID=B16_450-3,ID=B16_499-2	NA	NA
Raet1e	chr10	22173919	22374139	+	2	0.966184	0.00031395	0.00322604	2 [2,0]	0 [0,0]	1	ID=B16_464-1,ID=EL4_38_3	NA	NA
Samd4	chr14	46882965	47105817	+	2	0.966184	0.000314206	0.00322604	2 [0,2]	0 [0,0]	1	ID=B16_464-2,ID=B16_464-1	NA	NA
Nckap5	chr1	125913637	126830632	-	52	25.1208	0.000317772	0.0032546	52 [30,22]	0 [0,0]	0.995788	ID=B16_463-1,ID=EL4_28_3,ID=B16_101NT-3,ID=B16_464-2,ID=B16_464-1,ID=B16_456-4,ID=B16_485-1,ID=B16_487-4,ID=B16_485-3,ID=B16_487-2,ID=B16_498-1,ID=B16_502-3,ID=B16_460-1,ID=EL4_32_1,ID=EL4_45-1,ID=EL4PD1_104-1,ID=B16PD1_537_1,ID=B16_474-3,ID=B16_474-4,ID=EL4PD1_113-2,ID=B16_486-3,ID=EL4_55-2,ID=EL4PD1_113-1,ID=EL4_33_2,ID=EL4_32_2,ID=EL4PD1_150-2,ID=EL4PD1_154-1,ID=EL4_67-2,ID=EL4_64-5,ID=EL4_36_…	NA	NA
Btbd3	chr2	138256670	138589292	+	12	5.7971	0.000318449	0.0032546	12 [4,8]	0 [1,-1]	1	ID=B16_464-1,ID=B16_502-3,ID=B16_460-1,ID=B16_485-2,ID=B16_486-3,ID=EL4PD1_150-2,ID=B16_489-1,ID=B16_499-1,ID=B16_462-4,ID=B16_474-1,ID=B16_484-2,ID=B16_499-2	NA	NA
Stxbp5l	chr16	37114942	37384923	-	12	5.7971	0.000318449	0.0032546	12 [10,2]	0 [0,0]	1	ID=B16_464-2,ID=B16_502-3,ID=B16_474-4,ID=B16_497-1,ID=B16_497-2,ID=EL4_36_3,ID=EL4_36_2,ID=B16_499-1,ID=B16_462-4,ID=LLC_174-1,ID=B16_474-1,ID=B16_484-1	NA	NA
Bank1	chr3	136053363	136326066	-	10	4.83092	0.000317971	0.0032546	10 [7,3]	0 [0,0]	0.921728	ID=B16_463-1,ID=B16_464-1,ID=B16_460-1,ID=B16_16-3,ID=EL4_36_3,ID=B16_1-2,ID=B16_489-1,ID=B16_450-3,ID=B16_449-4,ID=B16_462-4	NA	NA
Olfr137	chr17	38303527	38307570	-	5	2.41546	0.000326315	0.00332737	5 [5,0]	0 [0,0]	1	ID=EL4_28_1,ID=EL4_18_2,ID=EL4_22_3,ID=EL4_32_3,ID=EL4_25_3	NA	NA
Ebf1	chr11	44617317	45008091	+	13	6.28019	0.000326698	0.00332746	13 [7,6]	0 [0,0]	1	ID=B16_464-1,ID=B16_450-1,ID=B16_502-3,ID=B16_460-1,ID=B16_474-4,ID=EL4PD1_115-2,ID=EL4PD1_115-3,ID=B16_489-1,ID=B16_499-1,ID=B16_451-5,ID=B16_462-4,ID=EL4_62-1,ID=EL4PD1_118-1	NA	NA
Ryr2	chr13	11553102	12106945	-	26	12.5604	0.000327578	0.00333262	26 [14,12]	0 [0,0]	1	ID=B16_468-4,ID=B16_463-1,ID=EL4_28_3,ID=B16_488-3,ID=B16_498-2,ID=B16_498-1,ID=B16_474-3,ID=B16_497-1,ID=B16_485-4,ID=B16_521-1,ID=B16_2-2,ID=B16_489-1,ID=EL4_70-2,ID=B16_451-5,ID=EL4PD1_118-2,ID=B16_518-1,ID=B16_462-4,ID=EL4_65-1,ID=B16_474-1,ID=B16_484-1,ID=B16_484-2,ID=B16_499-2,ID=EL4_29_2,ID=B16_516-2,ID=B16_491-2,ID=LLC_167-1	NA	NA
AC069563.1	chr9	38308797	38309731	+	3	1.44928	0.000328094	0.00333407	0 [0,0]	3 [0,3]	1	ID=B16_464-2,ID=B16_474-4,ID=B16_462-4	NA	NA
Cmss1	chr16	57302199	57606825	-	9	4.34783	0.000328816	0.0033376	9 [6,3]	0 [0,0]	1	ID=B16_463-1,ID=B16_498-2,ID=B16_502-3,ID=B16_460-1,ID=B16_474-4,ID=B16_450-3,ID=B16_499-1,ID=B16_462-4,ID=B16_499-2	NA	NA
Spef2	chr15	9578193	9748838	-	3	1.44928	0.000329205	0.00333775	3 [0,3]	0 [0,0]	1	ID=B16_464-2,ID=B16_489-1,ID=B16_499-1	NA	NA
Prkd1	chr12	50341231	50649098	-	12	5.7971	0.000331572	0.00335792	12 [7,5]	0 [0,0]	0.995998	ID=B16_463-1,ID=B16_464-1,ID=EL4PD1_116-3,ID=B16_460-1,ID=B16PD1_537_4,ID=B16_474-3,ID=EL4_32_2,ID=B16_499-1,ID=B16_475-1,ID=B16_462-4,ID=B16_474-1,ID=EL4_54-2	NA	NA
Synpr	chr14	13284780	13615459	+	12	5.7971	0.00033538	0.00339263	12 [3,9]	0 [0,0]	1	ID=B16_464-2,ID=B16_464-1,ID=EL4PD1_116-3,ID=B16_502-3,ID=B16_474-3,ID=EL4PD1_153-3,ID=EL4_67-2,ID=EL4_47-2,ID=EL4PD1_152-2,ID=EL4_54-4,ID=EL4_54-2,ID=B16_491-3	NA	NA
Atp8a2	chr14	59647531	60086834	-	14	6.76329	0.000339097	0.00341859	14 [9,5]	0 [0,0]	1	ID=B16_464-1,ID=B16_498-2,ID=B16_498-1,ID=B16_460-1,ID=B16_474-3,ID=B16_474-4,ID=B16_497-2,ID=EL4_36_2,ID=B16_450-3,ID=B16_475-1,ID=B16_462-4,ID=EL4_65-1,ID=EL4_44-2,ID=B16_491-3	NA	NA
AC069561.4	chr9	38762909	38765644	+	4	1.93237	0.000338816	0.00341859	2 [1,1]	2 [2,0]	1	ID=B16_474-4,ID=B16_462-4,ID=B16_484-1,ID=B16_491-3	NA	NA
Hs3st4	chr7	123982869	124398989	+	16	7.72947	0.000341046	0.00343435	16 [6,10]	0 [0,0]	0.935425	ID=B16_463-1,ID=B16_464-2,ID=B16_464-1,ID=B16_485-1,ID=B16_452-1,ID=B16PD1_537_2,ID=B16_474-3,ID=B16_474-4,ID=EL4PD1_115-2,ID=B16_489-1,ID=B16_499-1,ID=B16_451-3,ID=EL4_62-1,ID=LLC_170-1,ID=B16_524-1,ID=B16_516-2	NA	NA
Rdh12	chr12	79208914	79222665	+	6	2.89855	0.000356347	0.00357211	5 [4,1]	1 [1,0]	0.998464	ID=B16_488-3,ID=B16_464-1,ID=B16_487-2,ID=B16_486-3,ID=B16_449-4,ID=B16_499-1	NA	NA
Oog3	chr4	144157557	144162663	-	4	1.93237	0.00035673	0.00357211	1 [1,0]	3 [2,1]	1	ID=B16_464-2,ID=B16_460-1,ID=B16_474-3,ID=B16_462-4	NA	NA
Cyb5r4	chr9	87022014	87077774	+	14	6.76329	0.00036056	0.00360641	13 [9,4]	1 [1,0]	1	ID=B16_464-2,ID=B16_456-4,ID=B16_485-3,ID=B16_498-2,ID=B16_502-3,ID=B16_460-1,ID=B16_474-3,ID=B16_474-4,ID=B16_474-5,ID=EL4PD1_153-3,ID=B16_489-1,ID=B16_462-4,ID=EL4PD1_117-3,ID=B16_499-2	NA	NA
Ighv1-16	chr12	114665872	114666165	-	3	1.44928	0.000364052	0.00362912	3 [3,0]	0 [0,0]	1	ID=EL4_43-2,ID=EL4PD1_119-1,ID=EL4PD1_118-1	NA	NA
Iqsec1	chr6	90660981	90988685	-	6	2.89855	0.000369362	0.00367793	6 [3,3]	0 [0,0]	1	ID=B16_463-1,ID=B16_474-3,ID=B16_474-4,ID=EL4PD1_113-2,ID=B16_451-3,ID=EL4_48-1	NA	NA
Cyp2j7	chr4	96195197	96236659	-	12	5.7971	0.000373766	0.00371349	12 [6,6]	0 [0,0]	0.960152	ID=B16_488-3,ID=B16_502-3,ID=B16_474-3,ID=B16_474-4,ID=B16_474-5,ID=B16_450-3,ID=B16_451-5,ID=B16_462-4,ID=B16_484-1,ID=B16_484-2,ID=B16_499-2,ID=B16_491-2	NA	NA
Myo16	chr8	10153968	10634742	+	17	8.21256	0.0003804	0.00377519	17 [8,9]	0 [0,0]	1	ID=B16_463-1,ID=B16_464-2,ID=B16_464-1,ID=B16_485-3,ID=B16_502-3,ID=B16_460-1,ID=EL4_46-2,ID=B16_474-3,ID=B16_474-5,ID=B16_497-1,ID=B16_485-4,ID=EL4_67-2,ID=B16_489-1,ID=B16_462-4,ID=EL4_47-2,ID=EL4_47-1,ID=B16_491-2	predicted cancer driver	NA
Wnt6	chr1	74771892	74785322	+	4	1.93237	0.000381793	0.00378481	2 [0,2]	2 [1,1]	1	ID=B16_485-1,ID=B16_498-1,ID=B16_462-4,ID=B16_491-2	NA	NA
Pramel5	chr4	144270633	144280466	-	5	2.41546	0.000384569	0.00380386	3 [3,0]	2 [1,1]	1	ID=B16_464-2,ID=B16_460-1,ID=B16_474-3,ID=B16_462-4,ID=EL4_62-1	NA	NA
Kcnq1	chr7	143107254	143427042	+	7	3.38164	0.000387984	0.00383338	5 [2,3]	2 [2,0]	1	ID=B16_498-1,ID=B16_474-3,ID=B16PD1_532_2,ID=EL4_36_2,ID=B16_451-3,ID=B16_462-4,ID=LLC_170-1	NA	NA
Fbxl4	chr4	22357543	22434091	+	17	8.21256	0.000390414	0.00385312	17 [7,10]	0 [0,0]	1	ID=B16_488-3,ID=B16_464-2,ID=B16_460-1,ID=B16_485-2,ID=B16_474-3,ID=B16_474-4,ID=B16_497-1,ID=B16_489-1,ID=B16_450-3,ID=B16_451-5,ID=B16_451-3,ID=B16_475-2,ID=B16_462-4,ID=B16_474-1,ID=B16_484-1,ID=B16_499-2,ID=B16_491-3	NA	NA
Csgalnact1	chr8	68356781	68735146	-	15	7.24638	0.00039279	0.00386166	15 [7,8]	0 [0,0]	0.951156	ID=B16_463-1,ID=B16_464-2,ID=B16_464-1,ID=B16_498-1,ID=B16_502-3,ID=B16_460-1,ID=B16_474-4,ID=B16_497-1,ID=EL4_67-2,ID=B16PD1_532_1,ID=B16_450-3,ID=B16_499-1,ID=B16_451-3,ID=B16_462-4,ID=B16_484-4	NA	NA
Rpl5-ps1	chr1	14865072	14865965	+	3	1.44928	0.000393012	0.00386166	0 [0,0]	3 [0,3]	1	ID=B16_464-1,ID=B16_498-1,ID=EL4_70-3	NA	NA
Myo3b	chr2	70039126	70429195	+	12	5.7971	0.000399354	0.00391965	12 [5,7]	0 [0,0]	1	ID=B16_463-1,ID=B16_464-1,ID=B16_485-3,ID=B16_460-1,ID=B16_497-1,ID=B16_485-4,ID=B16_489-1,ID=B16_450-3,ID=B16_499-1,ID=B16_453-2,ID=B16_475-1,ID=B16_462-4	NA	NA
Pcsk2	chr2	143546156	143816285	+	7	3.38164	0.000401605	0.00393308	7 [5,2]	0 [0,0]	1	ID=B16_485-1,ID=B16_502-3,ID=B16_474-3,ID=B16_474-4,ID=EL4_55-2,ID=B16_525-1,ID=B16_462-4	NA	NA
B9d1	chr11	61505144	61512931	+	4	1.93237	0.000401504	0.00393308	3 [2,1]	1 [0,1]	1	ID=B16_101NT-3,ID=B16_498-1,ID=B16_474-3,ID=B16_451-3	NA	NA
Catsperb	chr12	101404673	101626009	+	6	2.89855	0.000404514	0.00395288	6 [3,3]	0 [0,0]	1	ID=EL4_49-1,ID=B16_474-4,ID=B16_474-5,ID=B16_450-3,ID=B16_499-1,ID=B16_499-2	NA	NA
Olfr581-ps1	chr7	103029093	103029648	+	3	1.44928	0.000413309	0.00402558	0 [0,0]	3 [2,1]	1	ID=B16_474-3,ID=EL4PD1_157-2,ID=B16_484-2	NA	NA
Slfnl1	chr4	120532231	120536661	+	3	1.44928	0.000413309	0.00402558	1 [0,1]	2 [1,1]	1	ID=B16_485-3,ID=B16_474-1,ID=EL4_29_2	NA	NA
Olfr890	chr9	38142517	38148375	+	5	2.41546	0.000414169	0.00402956	1 [1,0]	4 [1,3]	1	ID=B16_464-2,ID=B16_474-3,ID=B16_497-1,ID=B16_462-4,ID=B16_499-2	NA	NA
Mup2	chr4	60136117	60154289	-	7	3.38164	0.000420126	0.00408305	7 [4,3]	0 [0,0]	1	ID=EL4_49-1,ID=B16_474-4,ID=EL4_64-1,ID=B16_489-1,ID=B16_462-4,ID=EL4_62-1,ID=B16_484-1	NA	NA
Hydin	chr8	110266977	110610253	+	9	4.34783	0.00042253	0.00410195	8 [6,2]	1 [0,1]	1	ID=B16_463-1,ID=B16_464-1,ID=B16_498-1,ID=B16_502-3,ID=EL4_64-1,ID=B16_451-5,ID=B16_462-4,ID=EL4_54-2,ID=B16_499-2	NA	NA
Cav2	chr6	17281185	17289115	+	5	2.41546	0.000424438	0.00411151	0 [0,0]	5 [0,5]	1	ID=B16_101NT-3,ID=B16_487-2,ID=B16_497-1,ID=B16_497-2,ID=B16_491-2	NA	NA
Cyp2j11	chr4	96294508	96348662	-	14	6.76329	0.000432623	0.00418625	12 [6,6]	2 [1,1]	1	ID=B16_488-3,ID=B16_101NT-3,ID=B16_464-2,ID=B16_464-1,ID=B16_460-1,ID=B16_474-3,ID=B16_474-4,ID=B16_497-2,ID=B16_489-1,ID=B16_450-3,ID=B16_451-3,ID=B16_462-4,ID=B16_484-4,ID=B16_491-3	NA	NA
Tmem259	chr10	79977118	79984330	-	3	1.44928	0.000434424	0.00419911	0 [0,0]	3 [1,2]	1	ID=EL4_41-1,ID=B16_464-1,ID=EL4_45-1	NA	NA
Tex11	chrX	100838648	101059667	-	7	3.38164	0.000435681	0.0042067	7 [3,4]	0 [0,0]	1	ID=EL4_28_1,ID=B16_464-1,ID=B16_498-1,ID=EL4_49-1,ID=B16_489-1,ID=B16_450-3,ID=B16_491-2	NA	NA
Fhod3	chr18	24709445	25133500	+	14	6.76329	0.000451297	0.00435277	14 [4,10]	0 [0,0]	1	ID=B16_464-2,ID=B16_464-1,ID=B16_485-1,ID=B16PD1_537_4,ID=B16_474-3,ID=B16_521-2,ID=EL4_36_3,ID=B16_489-1,ID=B16_13-1,ID=B16_451-5,ID=B16_462-4,ID=EL4_62-1,ID=B16_484-2,ID=B16_524-1	NA	NA
Ttll5	chr12	85824710	86053760	+	4	1.93237	0.000456511	0.00439664	4 [3,1]	0 [0,0]	1	ID=B16_464-1,ID=B16_485-3,ID=B16_474-4,ID=B16_462-4	NA	NA
Shroom2	chrX	152609509	152769461	-	2	0.966184	0.000456832	0.00439664	2 [2,0]	0 [0,0]	1	ID=B16_498-1,ID=B16_462-4	NA	NA
Pigk	chr3	152714120	152980408	+	5	2.41546	0.000460307	0.00442531	5 [3,2]	0 [0,0]	1	ID=EL4_32_1,ID=B16_474-3,ID=B16_489-1,ID=B16_462-4,ID=B16_499-2	NA	NA
Rpl17-ps10	chr7	72648757	72649311	-	2	0.966184	0.000464327	0.00445914	0 [0,0]	2 [1,1]	1	ID=EL4PD1_116-3,ID=B16_475-2	NA	NA
Tpt1-ps5	chr9	37696515	37697030	+	3	1.44928	0.000467679	0.00447205	0 [0,0]	3 [3,0]	1	ID=B16_498-2,ID=B16_462-4,ID=B16_499-2	NA	NA
Wdr7	chr18	63708695	63989760	+	10	4.83092	0.000468578	0.00447585	10 [9,1]	0 [0,0]	1	ID=B16_463-1,ID=B16_464-2,ID=B16_502-3,ID=B16_474-3,ID=B16_497-1,ID=B16_485-4,ID=B16_451-5,ID=B16_462-4,ID=B16_499-2,ID=B16_491-3	NA	NA
Fmnl2	chr2	52857868	53134202	+	7	3.38164	0.000472942	0.00451011	7 [2,5]	0 [0,0]	0.87556	ID=B16_463-1,ID=B16_464-2,ID=EL4_49-1,ID=B16_474-4,ID=B16_497-1,ID=B16_499-1,ID=B16_474-2	NA	NA
Olfr971	chr9	39836876	39841281	+	4	1.93237	0.000473177	0.00451011	2 [2,0]	2 [0,2]	1	ID=B16_464-2,ID=B16_502-3,ID=B16_462-4,ID=B16_499-2	NA	NA
Olfr944	chr9	39201920	39218421	+	8	3.86473	0.000476192	0.00452521	6 [2,4]	2 [1,1]	1	ID=EL4PD1_116-2,ID=B16_450-1,ID=B16_502-3,ID=B16_451-5,ID=B16_451-3,ID=B16_462-4,ID=B16_484-2,ID=B16_499-2	NA	NA
Dcaf12	chr4	41291300	41314889	-	7	3.38164	0.000476792	0.00452521	7 [5,2]	0 [0,0]	0.859755	ID=B16_488-3,ID=B16_474-3,ID=B16_474-4,ID=B16_474-5,ID=EL4_64-1,ID=B16_451-5,ID=B16_499-2	NA	NA
Dock11	chrX	35888832	36076562	+	4	1.93237	0.000476656	0.00452521	4 [2,2]	0 [0,0]	1	ID=B16_463-1,ID=B16_464-2,ID=B16_450-3,ID=EL4PD1_152-1	NA	NA
Ttc7b	chr12	100300770	100520826	-	2	0.966184	0.000476481	0.00452521	2 [1,1]	0 [0,0]	0.667045	ID=B16_499-1,ID=EL4_62-1	NA	NA
AC153521.1	chr10	56100635	56102003	-	3	1.44928	0.000490938	0.00465451	0 [0,0]	3 [0,3]	0.999563	ID=B16_488-3,ID=B16_487-2,ID=B16_489-1	NA	NA
D1Ertd622e	chr1	97606318	97662074	-	13	6.28019	0.000493792	0.0046766	13 [8,5]	0 [0,0]	1	ID=B16_463-1,ID=B16_464-1,ID=B16_498-1,ID=EL4_45-1,ID=B16_474-4,ID=B16_486-3,ID=EL4_67-2,ID=EL4_70-2,ID=B16_499-1,ID=B16_451-3,ID=EL4_65-1,ID=B16PD1_160-3,ID=B16_499-2	NA	NA
Dock9	chr14	121543426	121797837	-	4	1.93237	0.000496878	0.00470083	4 [2,2]	0 [0,0]	1	ID=B16_464-1,ID=B16_497-1,ID=EL4_38_3,ID=B16_450-3	NA	NA
Nudcd3	chr11	6105691	6200415	-	17	8.21256	0.000498446	0.00471009	17 [8,9]	0 [0,0]	0.871397	ID=B16_463-1,ID=B16_488-3,ID=B16_487-4,ID=B16_450-1,ID=B16_498-2,ID=B16_498-1,ID=B16_474-4,ID=B16_497-1,ID=B16_497-2,ID=B16_486-3,ID=B16_485-4,ID=B16_489-1,ID=B16_499-1,ID=B16_475-2,ID=B16_484-2,ID=B16_499-2,ID=B16_491-3	NA	NA
Col24a1	chr3	145292472	145552011	+	8	3.86473	0.000498914	0.00471009	8 [5,3]	0 [0,0]	1	ID=B16_463-1,ID=B16_464-1,ID=B16_450-1,ID=B16_474-3,ID=EL4_70-2,ID=B16_499-1,ID=B16_451-5,ID=B16_462-4	NA	NA
Acaca	chr11	84173122	84401651	+	6	2.89855	0.000503557	0.00474387	6 [4,2]	0 [0,0]	1	ID=B16_464-1,ID=B16_487-4,ID=B16_450-1,ID=B16_497-1,ID=B16_450-3,ID=B16_461-1	NA	NA
Ubtfl1	chr9	18404420	18413177	+	5	2.41546	0.00050822	0.00477769	2 [1,1]	3 [1,2]	1	ID=B16_474-3,ID=B16_497-1,ID=EL4PD1_118-2,ID=EL4_54-2,ID=B16_499-2	NA	NA
Vps4a	chr8	107031222	107045755	+	5	2.41546	0.000514249	0.00482705	5 [5,0]	0 [0,0]	1	ID=B16_456-4,ID=B16_485-3,ID=B16_521-2,ID=B16_449-3,ID=B16_461-1	NA	NA
Prdm2	chr4	143107391	143212705	-	18	8.69565	0.000517547	0.00484493	18 [11,7]	0 [0,0]	0.99996	ID=B16_488-3,ID=B16_464-1,ID=B16_460-1,ID=B16_474-3,ID=B16_474-4,ID=EL4_64-1,ID=B16_489-1,ID=B16_499-1,ID=B16_451-5,ID=B16_451-3,ID=B16_462-4,ID=EL4_47-1,ID=EL4_62-1,ID=B16_474-1,ID=B16_484-1,ID=B16_499-2,ID=B16_491-3,ID=EL4PD1_152-1	NA	NA
Sema3d	chr5	12383385	12588948	+	7	3.38164	0.000520148	0.00486418	7 [3,4]	0 [0,0]	1	ID=B16_463-1,ID=B16_488-3,ID=B16_460-1,ID=B16_474-4,ID=B16_462-4,ID=EL4_65-1,ID=B16_474-1	NA	NA
Clec14a	chr12	58264720	58269290	-	4	1.93237	0.000520863	0.00486576	3 [3,0]	1 [1,0]	1	ID=B16_464-1,ID=B16_450-1,ID=B16_499-1,ID=B16_451-5	NA	NA
Mtss1l	chr8	110721476	110741400	+	5	2.41546	0.00052648	0.00491308	5 [0,5]	0 [0,0]	0.902629	ID=B16_455-1,ID=B16_4-2,ID=B16_454-3,ID=B16_13-3,ID=B16_13-1	NA	NA
Specc1	chr11	61956815	62219435	+	6	2.89855	0.000533272	0.00497125	6 [2,4]	0 [0,0]	1	ID=B16_488-3,ID=B16_464-1,ID=B16_485-1,ID=B16_502-3,ID=B16_474-3,ID=B16_474-4	NA	NA
Piezo2	chr18	63010213	63387183	-	13	6.28019	0.000535892	0.00498931	11 [6,5]	2 [0,2]	0.933427	ID=B16_502-3,ID=B16_474-4,ID=B16_474-5,ID=EL4PD1_115-3,ID=EL4_64-5,ID=B16_517-1,ID=B16_489-1,ID=B16_449-3,ID=B16_499-1,ID=B16_451-3,ID=B16_462-4,ID=EL4_65-1,ID=B16_499-2	NA	NA
Fam168b	chr1	34813226	34843065	-	8	3.86473	0.000536329	0.00498931	8 [4,4]	0 [0,0]	0.998256	ID=EL4_63-1,ID=B16_464-1,ID=B16_487-4,ID=B16_502-3,ID=EL4_67-2,ID=B16_489-1,ID=B16_499-1,ID=B16_451-5	NA	NA
Cped1	chr6	21985916	22256404	+	8	3.86473	0.000537752	0.00499734	8 [2,6]	0 [0,0]	1	ID=B16_464-1,ID=B16_502-3,ID=B16_460-1,ID=B16_485-2,ID=B16_474-4,ID=EL4_36_2,ID=B16_489-1,ID=B16_491-3	NA	NA
AC162931.2	chr9	17523979	17524245	+	3	1.44928	0.000540174	0.00500419	0 [0,0]	3 [0,3]	0.99872	ID=B16_464-2,ID=B16_460-1,ID=B16_462-4	NA	NA
Dph6	chr2	114516420	114654964	-	2	0.966184	0.000542766	0.00502298	1 [1,0]	1 [1,0]	1	ID=EL4_18_2,ID=B16_474-1	NA	NA
Dym	chr18	75018772	75286966	+	5	2.41546	0.000546665	0.00505381	5 [2,3]	0 [0,0]	1	ID=B16_488-3,ID=B16_464-1,ID=EL4_18_2,ID=B16_489-1,ID=B16_499-1	NA	NA
Sorcs3	chr19	48206025	48805505	+	29	14.0097	0.000550677	0.00508563	29 [14,15]	0 [0,0]	1	ID=B16_463-1,ID=B16_488-3,ID=B16_464-2,ID=B16_464-1,ID=EL4PD1_156-2,ID=B16_450-1,ID=B16_474-3,ID=B16_474-4,ID=B16_497-1,ID=B16_486-3,ID=EL4PD1_154-1,ID=B16PD1_531_1,ID=B16_489-1,ID=B16_450-3,ID=B16_499-1,ID=EL4_24_1,ID=B16_451-5,ID=B16_451-3,ID=B16_518-2,ID=B16_475-1,ID=B16_462-4,ID=EL4PD1_152-2,ID=EL4_62-1,ID=B16_484-1,ID=B16_484-2,ID=EL4PD1_152-1,ID=B16_516-2,ID=B16_520-2,ID=B16_491-2	NA	NA
Olfr149	chr9	39700518	39707117	-	5	2.41546	0.000558088	0.00514874	3 [3,0]	2 [1,1]	1	ID=B16_460-1,ID=B16_474-4,ID=EL4_67-2,ID=B16_489-1,ID=EL4_47-1	NA	NA
Cyp2j6	chr4	96516138	96553661	-	11	5.31401	0.000571722	0.00526362	11 [6,5]	0 [0,0]	1	ID=B16_488-3,ID=B16_485-1,ID=B16_502-1,ID=B16_460-1,ID=B16_474-3,ID=B16_474-4,ID=EL4_59-1,ID=B16_485-4,ID=B16_489-1,ID=B16_462-4,ID=B16_491-3	NA	NA
Gphn	chr12	78226379	78684772	+	29	14.0097	0.000577578	0.00530849	28 [17,11]	1 [1,0]	0.999965	ID=B16_463-1,ID=B16_488-3,ID=B16_464-2,ID=B16_464-1,ID=EL4_60-1,ID=LLC_168-1,ID=LLC_172-2,ID=B16_502-3,ID=EL4_45-1,ID=B16PD1_537_4,ID=B16_16-2,ID=B16_474-3,ID=EL4_32_3,ID=B16_486-3,ID=EL4_55-2,ID=EL4PD1_150-2,ID=B16_485-4,ID=EL4_67-2,ID=EL4_64-2,ID=B16_489-1,ID=B16_450-3,ID=B16_449-4,ID=B16_499-1,ID=LLC_169-2,ID=B16PD1_160-2,ID=EL4_62-1,ID=B16_474-1,ID=B16_484-4,ID=B16_484-1	NA	NA
Rnls	chr19	33137747	33392295	-	9	4.34783	0.000578868	0.00530849	9 [2,7]	0 [0,0]	1	ID=B16_464-1,ID=B16_485-3,ID=B16_502-3,ID=B16_460-1,ID=B16_474-3,ID=B16_451-3,ID=B16_462-4,ID=B16_524-2,ID=B16_491-3	NA	NA
AC073947.1	chr9	39096967	39097615	+	3	1.44928	0.000579574	0.00530849	0 [0,0]	3 [3,0]	1	ID=EL4_45-1,ID=B16_484-1,ID=B16_499-2	NA	NA
Orm1	chr4	63344560	63348163	+	3	1.44928	0.000593194	0.00542767	1 [1,0]	2 [0,2]	1	ID=B16_463-1,ID=B16_489-1,ID=B16_462-4	NA	NA
Cntnap5a	chr1	115684756	116587323	+	64	30.9179	0.000595713	0.00544513	64 [32,32]	0 [0,0]	0.994267	ID=EL4_41-1,ID=B16_463-1,ID=B16PD1_534_2,ID=EL4_28_4,ID=B16_455-2,ID=B16_488-3,ID=EL4_26_4,ID=B16_464-2,ID=B16_464-1,ID=EL4_60-1,ID=B16_487-4,ID=B16_485-3,ID=B16_487-2,ID=EL4PD1_114-3,ID=B16_450-1,ID=B16_498-2,ID=B16_498-1,ID=LLC_168-1,ID=B16_502-3,ID=B16_460-1,ID=EL4_70-1,ID=EL4_45-1,ID=EL4_22_3,ID=B16_16-3,ID=B16_474-3,ID=B16_497-1,ID=EL4_19_2,ID=EL4_27_3,ID=EL4_32_3,ID=B16_486-3,ID=EL4PD1_115-…	NA	NA
Limch1	chr5	66745845	67056214	+	8	3.86473	0.000596738	0.0054489	8 [3,5]	0 [0,0]	0.959837	ID=B16_463-1,ID=B16_450-1,ID=B16_502-1,ID=B16_474-3,ID=B16_474-4,ID=B16_474-5,ID=B16_485-4,ID=B16_462-4	NA	NA
Rapgef2	chr3	79062531	79286517	-	5	2.41546	0.000598674	0.00546099	5 [1,4]	0 [0,0]	1	ID=B16_463-1,ID=B16_464-1,ID=EL4_49-1,ID=B16_451-5,ID=B16_499-2	NA	NA
Btbd9	chr17	30215524	30576287	-	10	4.83092	0.000602708	0.00549216	10 [6,4]	0 [0,0]	1	ID=EL4_28_3,ID=EL4_63-1,ID=B16_101NT-3,ID=B16_464-2,ID=B16_460-1,ID=B16_474-3,ID=B16_474-4,ID=B16_474-5,ID=B16_499-1,ID=B16_451-3	NA	NA
Epb41l4b	chr4	56991972	57143437	-	21	10.1449	0.000604278	0.00550084	20 [14,6]	1 [0,1]	1	ID=B16PD1_534_1,ID=EL4_28_1,ID=EL4_28_3,ID=EL4_26_4,ID=B16_450-1,ID=EL4_18_2,ID=B16_502-3,ID=B16_460-1,ID=EL4_22_3,ID=B16_474-3,ID=B16_474-4,ID=EL4_32_3,ID=EL4PD1_150-3,ID=EL4_52-5,ID=B16_489-1,ID=B16_499-1,ID=B16_475-1,ID=B16_462-4,ID=LLC_174-3,ID=EL4_47-1,ID=B16_491-3	NA	NA
Trpc6	chr9	8544142	8680741	+	25	12.0773	0.00061276	0.00556669	25 [15,10]	0 [0,0]	0.98469	ID=EL4_41-1,ID=B16_463-1,ID=B16_488-3,ID=B16_464-2,ID=EL4PD1_114-3,ID=B16_498-2,ID=B16_502-3,ID=B16_460-1,ID=EL4_46-2,ID=B16_474-3,ID=B16_474-4,ID=EL4PD1_115-3,ID=EL4_67-2,ID=EL4_64-5,ID=EL4_64-2,ID=B16_450-3,ID=B16_451-5,ID=B16_462-4,ID=EL4_47-1,ID=B16_474-1,ID=EL4PD1_117-3,ID=EL4_54-2,ID=B16_499-2,ID=B16_491-3,ID=B16_474-2	NA	NA
Tbx20	chr9	24718138	24774284	-	13	6.28019	0.000623326	0.00564541	6 [6,0]	7 [3,4]	0.978759	ID=B16_464-2,ID=B16_502-3,ID=B16_474-4,ID=EL4_52-5,ID=B16_521-1,ID=B16_522-2,ID=B16_451-5,ID=B16_453-2,ID=B16_462-4,ID=B16_17-1,ID=EL4PD1_152-2,ID=B16_524-1,ID=B16_491-3	NA	NA
Ano3	chr2	110655201	110950923	-	14	6.76329	0.000625942	0.00566335	14 [1,13]	0 [0,0]	1	ID=B16_464-2,ID=B16_474-4,ID=EL4_19_2,ID=EL4PD1_153-3,ID=B16_485-4,ID=EL4_36_3,ID=B16_489-1,ID=B16_450-3,ID=B16_499-1,ID=B16_462-4,ID=B16PD1_160-2,ID=B16_14-1,ID=EL4PD1_152-2,ID=B16_474-1	NA	NA
Pdhb	chr14	8165991	8172992	-	4	1.93237	0.000627707	0.00567356	4 [4,0]	0 [0,0]	1	ID=EL4_55-2,ID=EL4_48-1,ID=LLC_170-1,ID=EL4_54-2	NA	NA
Tjp1	chr7	65342617	65527696	-	2	0.966184	0.000631258	0.00569987	2 [0,2]	0 [0,0]	1	ID=B16_485-1,ID=B16_524-1	NA	NA
Cyp4b1	chr4	115624725	115647723	-	7	3.38164	0.000632286	0.00570338	6 [3,3]	1 [1,0]	1	ID=B16_464-2,ID=B16_502-3,ID=B16_474-3,ID=B16_474-4,ID=B16_489-1,ID=B16_451-3,ID=B16_462-4	NA	NA
Pcsk5	chr19	17432832	17837632	-	17	8.21256	0.00063718	0.0057417	17 [9,8]	0 [0,0]	1	ID=B16_464-2,ID=B16_464-1,ID=B16_487-2,ID=B16_502-3,ID=B16_474-3,ID=B16_474-4,ID=B16_474-5,ID=EL4_59-1,ID=EL4_55-2,ID=B16PD1_532_1,ID=B16_499-1,ID=B16_451-5,ID=LLC_169-2,ID=B16_451-3,ID=EL4PD1_117-1,ID=EL4_54-4,ID=B16_499-2	NA	NA
Tmtc3	chr10	100443902	100487350	-	13	6.28019	0.000644684	0.00580345	13 [9,4]	0 [0,0]	1	ID=EL4_28_3,ID=B16_460-1,ID=EL4PD1_104-1,ID=B16PD1_537_1,ID=EL4_27_3,ID=EL4_32_3,ID=B16_485-4,ID=B16PD1_531_2,ID=EL4_67-1,ID=EL4_25_3,ID=EL4_24_1,ID=EL4_54-3,ID=EL4_29_2	NA	NA
AC161256.1	chr9	78767107	78767532	-	3	1.44928	0.000650191	0.00584124	0 [0,0]	3 [3,0]	1	ID=B16_474-4,ID=EL4_64-1,ID=EL4_29_2	NA	NA
Cdkl5	chrX	160784308	160994704	-	6	2.89855	0.00065216	0.00585302	5 [3,2]	1 [0,1]	1	ID=B16_460-1,ID=B16_474-3,ID=B16_474-4,ID=B16_450-3,ID=B16_499-2,ID=B16_474-2	NA	NA
Lmo3	chr6	138362918	138581968	-	7	3.38164	0.000653587	0.00585993	7 [4,3]	0 [0,0]	1	ID=B16_463-1,ID=B16_464-2,ID=B16_464-1,ID=B16_502-1,ID=EL4_22_3,ID=B16_489-1,ID=B16_499-1	NA	NA
Tmem132c	chr5	127241808	127565793	+	7	3.38164	0.000657649	0.00589042	7 [4,3]	0 [0,0]	1	ID=B16_463-1,ID=B16_464-2,ID=B16_474-4,ID=B16_497-1,ID=B16_486-3,ID=EL4_55-2,ID=B16_489-1	NA	NA
Kcnq3	chr15	65986387	66286224	-	9	4.34783	0.000662054	0.00592392	9 [6,3]	0 [0,0]	0.917248	ID=B16_463-1,ID=B16_464-1,ID=B16PD1_161-4,ID=B16_474-4,ID=EL4_32_2,ID=B16_485-4,ID=B16_462-4,ID=B16_499-2,ID=EL4_29_2	NA	NA
AC113082.2	chr9	24957580	24958186	-	3	1.44928	0.000665085	0.00592724	0 [0,0]	3 [2,1]	1	ID=B16_463-1,ID=B16_489-1,ID=B16_450-3	NA	NA
Eps15	chr4	109280268	109387817	+	22	10.628	0.000670862	0.00596679	21 [12,9]	1 [1,0]	1	ID=B16_488-3,ID=B16_464-2,ID=B16_485-1,ID=B16_485-3,ID=B16_502-3,ID=B16_474-4,ID=B16_497-1,ID=B16_486-3,ID=EL4PD1_113-1,ID=EL4PD1_150-2,ID=B16_485-4,ID=EL4_64-2,ID=B16_489-1,ID=B16_499-1,ID=B16_451-3,ID=B16_475-1,ID=B16_462-4,ID=B16PD1_160-2,ID=B16PD1_160-3,ID=EL4_62-1,ID=B16_474-1,ID=B16_484-2	NA	NA
Reln	chr5	21884454	22344702	-	22	10.628	0.00067044	0.00596679	22 [15,7]	0 [0,0]	0.924081	ID=B16_463-1,ID=EL4_28_1,ID=EL4_60-2,ID=B16_488-3,ID=EL4_26_4,ID=EL4_63-1,ID=B16_464-2,ID=B16_464-1,ID=B16_498-1,ID=B16_502-3,ID=B16_460-1,ID=B16_474-3,ID=B16_474-4,ID=EL4_32_2,ID=B16_454-3,ID=EL4_36_3,ID=EL4_36_2,ID=B16_2-2,ID=B16_489-1,ID=B16_499-1,ID=B16_499-2,ID=B16_491-3	NA	NA
Syt1	chr10	108497652	109010982	-	30	14.4928	0.000674394	0.00599222	30 [18,12]	0 [0,0]	0.974445	ID=EL4PD1_116-2,ID=B16_101NT-3,ID=B16_464-2,ID=B16_464-1,ID=EL4PD1_116-3,ID=B16_485-1,ID=B16_487-2,ID=B16_498-2,ID=B16_498-1,ID=B16_460-1,ID=B16PD1_537_4,ID=B16_485-2,ID=B16_474-3,ID=B16_497-1,ID=B16_497-2,ID=B16_486-3,ID=B16_485-4,ID=B16PD1_531_1,ID=B16_454-3,ID=B16_489-1,ID=B16_449-4,ID=B16_499-1,ID=LLC_169-2,ID=B16_475-2,ID=B16_462-4,ID=B16_484-1,ID=B16_484-2,ID=B16_499-2,ID=B16_491-3,ID=B16_4…	NA	NA
Nsmce2	chr15	59374198	59601683	+	5	2.41546	0.000675445	0.00599558	5 [2,3]	0 [0,0]	1	ID=B16_463-1,ID=B16_488-3,ID=B16_485-1,ID=B16_474-4,ID=EL4PD1_157-2	NA	NA
Asb3	chr11	30885416	31101333	+	6	2.89855	0.000678659	0.00601812	6 [2,4]	0 [0,0]	1	ID=B16_464-2,ID=B16_464-1,ID=B16_502-3,ID=B16_485-4,ID=B16_499-1,ID=EL4_47-2	NA	NA
Runx2	chr17	44495987	44736176	-	4	1.93237	0.000679531	0.00601986	4 [1,3]	0 [0,0]	1	ID=B16_485-1,ID=B16_474-5,ID=B16_486-3,ID=B16_491-3	NA	NA
AC158606.2	chr10	82430704	82432393	+	3	1.44928	0.000695668	0.00615058	3 [0,3]	0 [0,0]	1	ID=B16_497-2,ID=B16PD1_531_2,ID=B16_489-1	NA	NA
Ispd	chr12	36381519	36689444	+	13	6.28019	0.000699244	0.00617608	13 [9,4]	0 [0,0]	1	ID=B16_463-1,ID=B16_488-3,ID=B16_464-2,ID=B16_464-1,ID=B16_485-3,ID=B16_502-3,ID=B16_460-1,ID=B16PD1_533_2,ID=B16_474-4,ID=EL4PD1_114-1,ID=B16_475-1,ID=B16_462-4,ID=EL4_72-3	NA	NA
Rasgef1b	chr5	99217426	99728812	-	21	10.1449	0.000705025	0.00622097	21 [5,16]	0 [0,0]	0.972619	ID=B16_463-1,ID=B16_488-3,ID=B16_464-2,ID=B16_502-3,ID=B16_502-1,ID=B16_460-1,ID=B16_474-3,ID=B16_474-4,ID=EL4PD1_150-2,ID=B16_517-1,ID=B16_489-1,ID=B16_475-1,ID=B16_475-2,ID=B16_462-4,ID=EL4_47-2,ID=EL4PD1_117-3,ID=EL4_54-2,ID=B16_499-2,ID=B16_491-3,ID=B16_516-2,ID=B16_520-2	NA	NA
Serpinb10	chr1	107529027	107549271	+	8	3.86473	0.000705856	0.00622214	4 [1,3]	4 [3,1]	0.999189	ID=B16_463-1,ID=B16_464-1,ID=B16_487-4,ID=B16_498-1,ID=EL4_45-1,ID=B16_489-1,ID=B16_484-1,ID=EL4PD1_117-3	NA	NA
Caln1	chr5	130369455	130840174	+	18	8.69565	0.000707626	0.00622543	18 [10,8]	0 [0,0]	1	ID=B16_463-1,ID=B16_488-3,ID=B16_464-2,ID=B16_464-1,ID=B16_485-3,ID=B16_450-1,ID=B16_502-3,ID=B16_485-2,ID=B16_474-3,ID=B16_474-4,ID=B16_497-1,ID=EL4PD1_154-1,ID=EL4PD1_156-4,ID=B16_451-5,ID=B16_451-3,ID=B16_462-4,ID=B16PD1_163-3,ID=B16_499-2	NA	NA
Cpne3	chr4	19519254	19570108	-	13	6.28019	0.000707293	0.00622543	13 [5,8]	0 [0,0]	1	ID=B16_488-3,ID=EL4_63-1,ID=B16_464-2,ID=B16_485-1,ID=B16_487-4,ID=B16_460-1,ID=B16_474-3,ID=B16_486-3,ID=B16_449-4,ID=B16_462-4,ID=LLC_170-1,ID=B16_484-4,ID=B16_484-1	NA	NA
Dnajc1	chr2	18206333	18392811	-	5	2.41546	0.000710906	0.00622757	5 [2,3]	0 [0,0]	1	ID=B16_464-2,ID=B16_474-3,ID=B16_474-4,ID=B16_489-1,ID=B16_450-3	NA	NA
Pycr2	chr1	180904293	180908088	+	3	1.44928	0.000711363	0.00622757	2 [2,0]	1 [1,0]	1	ID=B16_475-2,ID=B16_474-1,ID=B16_491-3	NA	NA
Serpina3e-ps	chr12	104189517	104192926	-	3	1.44928	0.000711363	0.00622757	1 [1,0]	2 [0,2]	1	ID=B16_464-2,ID=B16_486-3,ID=B16_450-3	NA	NA
Ebf2	chr14	67233586	67430918	+	2	0.966184	0.00070899	0.00622757	2 [0,2]	0 [0,0]	1	ID=B16_463-1,ID=B16_502-3	NA	NA
Sema3e	chr5	14025276	14256689	+	9	4.34783	0.000736404	0.00643266	9 [3,6]	0 [0,0]	1	ID=EL4_28_2,ID=B16_464-2,ID=B16_464-1,ID=B16_498-1,ID=B16_460-1,ID=B16_474-3,ID=B16_475-1,ID=B16_462-4,ID=B16_484-2	NA	NA
Cyp4a10	chr4	115518264	115533649	+	6	2.89855	0.000737398	0.00643266	5 [2,3]	1 [0,1]	1	ID=B16_464-1,ID=B16_460-1,ID=B16_474-3,ID=EL4PD1_157-2,ID=B16_451-5,ID=EL4_65-1	NA	NA
Chn2	chr6	54039573	54300721	+	5	2.41546	0.000737677	0.00643266	5 [1,4]	0 [0,0]	1	ID=B16_485-3,ID=B16_450-1,ID=B16_502-3,ID=B16_474-1,ID=B16_524-1	NA	NA
Spock3	chr8	62951009	63356852	+	26	12.5604	0.000740234	0.00644235	26 [11,15]	0 [0,0]	1	ID=B16_463-1,ID=B16_464-2,ID=B16_464-1,ID=B16_450-1,ID=B16_498-2,ID=B16_502-1,ID=EL4_49-1,ID=B16_460-1,ID=B16PD1_533_2,ID=B16_474-3,ID=B16_474-4,ID=B16_497-1,ID=EL4_32_3,ID=B16_486-3,ID=EL4PD1_153-3,ID=B16_489-1,ID=B16_450-3,ID=B16_451-5,ID=B16_462-4,ID=B16PD1_160-3,ID=EL4_62-1,ID=B16_484-4,ID=B16_484-1,ID=B16_499-2,ID=EL4PD1_152-3,ID=B16_491-3	NA	NA
Kctd8	chr5	69109285	69341679	-	9	4.34783	0.000739765	0.00644235	9 [3,6]	0 [0,0]	1	ID=B16_463-1,ID=B16_101NT-3,ID=B16_464-2,ID=B16_485-3,ID=B16_474-3,ID=B16_474-4,ID=B16_499-1,ID=LLC_169-2,ID=B16_462-4	NA	NA
Mthfsl	chr9	88688602	88719813	-	9	4.34783	0.000751505	0.00652134	8 [4,4]	1 [1,0]	1	ID=EL4PD1_116-3,ID=B16_502-3,ID=EL4_49-1,ID=B16_486-3,ID=EL4_55-2,ID=EL4PD1_157-2,ID=EL4PD1_156-4,ID=B16_450-3,ID=EL4_54-2	NA	NA
Tgfbr1	chr4	47353222	47414931	+	15	7.24638	0.00075706	0.00656315	12 [7,5]	3 [0,3]	1	ID=B16_464-2,ID=B16_464-1,ID=B16_487-4,ID=B16_450-1,ID=B16_502-3,ID=B16_502-1,ID=EL4_49-1,ID=B16_497-1,ID=B16_485-4,ID=B16_451-5,ID=B16_451-3,ID=B16_462-4,ID=B16_484-2,ID=EL4_54-2,ID=B16_491-2	NA	NA
Ddx10	chr9	53098635	53248053	-	29	14.0097	0.000770793	0.00667571	29 [12,17]	0 [0,0]	0.988267	ID=EL4PD1_116-2,ID=B16_463-1,ID=B16_488-3,ID=B16_464-2,ID=B16_464-1,ID=B16_485-3,ID=B16_487-2,ID=B16_498-1,ID=B16_502-3,ID=EL4_45-1,ID=B16_474-3,ID=B16_474-4,ID=B16_497-1,ID=EL4_34_5,ID=B16_486-3,ID=EL4_55-2,ID=EL4_64-1,ID=B16PD1_532_2,ID=EL4_36_2,ID=B16_489-1,ID=B16_450-3,ID=B16_449-4,ID=B16_499-1,ID=B16_451-3,ID=B16_462-4,ID=EL4_47-1,ID=B16_484-1,ID=B16_484-2,ID=B16_499-2	NA	NA
Tpm2	chr4	43514711	43523595	-	4	1.93237	0.000773576	0.00669331	2 [0,2]	2 [1,1]	0.985203	ID=B16_464-2,ID=B16_502-1,ID=B16_499-2,ID=LLC_167-1	NA	NA
Nek1	chr8	60993195	61131346	+	2	0.966184	0.000784719	0.00677001	2 [1,1]	0 [0,0]	0.996901	ID=B16_487-4,ID=B16_474-4	NA	NA
Mup-ps17	chr4	61857321	61857876	-	3	1.44928	0.000794003	0.00684348	0 [0,0]	3 [1,2]	1	ID=B16_460-1,ID=B16_489-1,ID=B16_499-2	NA	NA
Rilpl2	chr5	124463265	124478366	-	5	2.41546	0.000798481	0.00687542	0 [0,0]	5 [0,5]	1	ID=EL4_28_1,ID=EL4_26_4,ID=B16PD1_537_1,ID=EL4_32_3,ID=B16_491-3	NA	NA
Rasgrf1	chr9	89909909	90026977	+	19	9.17874	0.000808274	0.00695303	19 [11,8]	0 [0,0]	1	ID=B16_463-1,ID=B16_455-2,ID=B16_464-2,ID=B16_485-3,ID=B16_502-3,ID=EL4_49-1,ID=B16_460-1,ID=B16PD1_533_3,ID=B16_485-2,ID=B16_474-3,ID=B16_474-4,ID=B16_450-3,ID=B16_449-4,ID=B16_475-1,ID=B16_462-4,ID=EL4PD1_152-2,ID=EL4PD1_117-3,ID=B16_499-2,ID=B16_491-3	predicted cancer driver	NA
Aig1	chr10	13647054	13868980	-	5	2.41546	0.000815052	0.00700457	5 [2,3]	0 [0,0]	1	ID=B16_464-2,ID=LLC_168-1,ID=B16_474-3,ID=EL4_36_3,ID=EL4_62-1	NA	NA
Adam12	chr7	133883199	134225097	-	10	4.83092	0.000817954	0.00702274	9 [5,4]	1 [0,1]	1	ID=B16_463-1,ID=B16_488-3,ID=B16_464-1,ID=B16_498-1,ID=B16_4-2,ID=B16_474-3,ID=B16_474-4,ID=EL4_36_3,ID=B16_489-1,ID=B16_499-1	NA	NA
Pbx3	chr2	34171457	34372038	-	6	2.89855	0.0008188	0.00702324	6 [1,5]	0 [0,0]	1	ID=B16_485-1,ID=B16_498-1,ID=B16_474-3,ID=B16_486-3,ID=B16_451-5,ID=B16_451-3	NA	NA
Zfp317	chr9	19622128	19649731	+	9	4.34783	0.00082754	0.00709013	9 [4,5]	0 [0,0]	0.980676	ID=B16_502-3,ID=B16_474-3,ID=EL4_36_4,ID=EL4PD1_118-2,ID=B16_484-1,ID=EL4PD1_117-3,ID=EL4PD1_118-1,ID=B16_499-2,ID=EL4PD1_118-3	NA	NA
Akap9	chr5	3928274	4081310	+	2	0.966184	0.00082819	0.00709013	2 [1,1]	0 [0,0]	1	ID=B16_464-2,ID=EL4_48-4	NA	NA
AC079245.2	chr9	75964204	75964485	+	3	1.44928	0.000847035	0.00723756	1 [0,1]	2 [2,0]	1	ID=B16_488-3,ID=B16_474-5,ID=B16_462-4	NA	NA
Plscr1	chr9	92249750	92272278	+	8	3.86473	0.000848546	0.00724352	8 [6,2]	0 [0,0]	1	ID=EL4_60-2,ID=B16_488-3,ID=EL4_45-1,ID=B16_474-4,ID=B16_489-1,ID=EL4PD1_118-2,ID=B16_462-4,ID=B16_484-2	NA	NA
Klhl32	chr4	24612554	24851124	-	37	17.8744	0.000850352	0.007252	36 [19,17]	1 [-1,2]	0.98917	ID=B16_463-1,ID=B16_488-3,ID=B16_464-2,ID=B16_464-1,ID=EL4_60-1,ID=B16_485-1,ID=B16_487-4,ID=B16_485-3,ID=EL4PD1_114-3,ID=B16_450-1,ID=B16_502-3,ID=B16_460-1,ID=EL4_45-1,ID=B16_485-2,ID=B16_474-3,ID=B16_474-4,ID=B16_497-1,ID=EL4_32_3,ID=B16_486-3,ID=EL4_67-1,ID=B16_489-1,ID=B16_450-3,ID=EL4_24_1,ID=B16_451-5,ID=B16_451-3,ID=B16_518-2,ID=B16_462-4,ID=EL4PD1_152-2,ID=EL4_62-1,ID=B16_474-1,ID=B16_48…	NA	NA
Olfr135	chr17	38204335	38210915	+	5	2.41546	0.000851606	0.00725575	5 [1,4]	0 [0,0]	1	ID=B16_474-4,ID=B16_521-1,ID=B16_524-1,ID=B16_515-2,ID=B16_516-2	NA	NA
Nhsl2	chrX	101849385	102092055	+	4	1.93237	0.000861293	0.00732428	4 [1,3]	0 [0,0]	0.751876	ID=B16_463-1,ID=B16PD1_532_2,ID=B16_484-1,ID=B16_484-2	NA	NA
Cers6	chr2	68861441	69114282	+	7	3.38164	0.00086226	0.00732551	7 [5,2]	0 [0,0]	1	ID=B16_464-1,ID=B16_485-3,ID=B16_498-1,ID=B16_489-1,ID=B16_499-1,ID=B16_484-2,ID=B16_491-3	NA	NA
Megf11	chr9	64385626	64709205	+	6	2.89855	0.000867241	0.00736081	6 [3,3]	0 [0,0]	1	ID=B16_464-2,ID=B16_502-1,ID=B16_460-1,ID=B16_485-2,ID=B16_489-1,ID=B16_491-3	NA	NA
Cnn2	chr10	79988584	79996062	+	3	1.44928	0.00088388	0.00748777	0 [0,0]	3 [1,2]	1	ID=EL4_41-1,ID=B16_464-1,ID=EL4_45-1	NA	NA
CT010450.1	chr12	7417425	7418124	-	3	1.44928	0.00088388	0.00748777	0 [0,0]	3 [2,1]	1	ID=B16_502-3,ID=EL4_67-2,ID=B16_462-4	NA	NA
Ptprr	chr10	116018213	116274932	+	8	3.86473	0.000894025	0.00756652	8 [4,4]	0 [0,0]	1	ID=EL4_28_3,ID=B16_464-2,ID=B16_464-1,ID=B16PD1_533_2,ID=EL4_27_3,ID=B16_499-1,ID=B16_462-4,ID=EL4_62-1	NA	NA
Olfr889	chr9	38115198	38121245	+	5	2.41546	0.000897999	0.00759295	2 [1,1]	3 [2,1]	1	ID=B16_464-1,ID=B16_474-3,ID=EL4PD1_156-3,ID=B16_462-4,ID=EL4_72-3	NA	NA
Smap2	chr4	120968317	121017247	-	11	5.31401	0.000900665	0.00760827	10 [6,4]	1 [0,1]	1	ID=B16_463-1,ID=B16_464-2,ID=B16_464-1,ID=B16_460-1,ID=EL4_22_3,ID=B16_474-4,ID=B16_499-1,ID=EL4_62-1,ID=B16_484-4,ID=B16_484-1,ID=EL4_54-2	NA	NA
Baz2b	chr2	59899363	60125697	-	7	3.38164	0.000905735	0.00763663	7 [5,2]	0 [0,0]	1	ID=B16_463-1,ID=EL4_28_3,ID=EL4_60-2,ID=B16_450-1,ID=B16_489-1,ID=B16_474-1,ID=EL4_54-2	NA	NA
Col15a1	chr4	47208161	47313167	+	15	7.24638	0.00090975	0.00765786	10 [6,4]	5 [5,0]	0.922083	ID=EL4PD1_116-2,ID=EL4PD1_116-1,ID=B16_464-2,ID=B16_487-2,ID=EL4PD1_114-3,ID=EL4_49-1,ID=B16_474-4,ID=B16_486-3,ID=EL4PD1_115-3,ID=B16_485-4,ID=B16_489-1,ID=B16_450-3,ID=B16_499-1,ID=B16_451-3,ID=B16_499-2	NA	NA
Slc35f4	chr14	49298519	49525886	-	6	2.89855	0.000909973	0.00765786	5 [1,4]	1 [0,1]	1	ID=EL4_60-2,ID=B16PD1_537_1,ID=B16_474-3,ID=EL4_64-5,ID=B16_462-4,ID=B16_499-2	NA	NA
Megf10	chr18	57133090	57297467	+	2	0.966184	0.000913547	0.00768069	2 [2,0]	0 [0,0]	1	ID=EL4PD1_114-1,ID=B16_462-4	NA	NA
Fmn1	chr2	113327736	113716767	+	16	7.72947	0.000918798	0.00771029	14 [8,6]	2 [2,0]	1	ID=EL4_41-1,ID=B16_464-1,ID=B16_485-1,ID=B16_502-3,ID=B16_485-2,ID=B16_474-4,ID=B16_474-5,ID=B16_486-3,ID=B16_485-4,ID=EL4_67-2,ID=EL4_64-2,ID=EL4_64-1,ID=B16_489-1,ID=B16_499-1,ID=B16_484-4,ID=B16_499-2	NA	NA
Kcnt2	chr1	140246158	140612067	+	22	10.628	0.000920293	0.00771165	22 [9,13]	0 [0,0]	1	ID=B16_463-1,ID=B16_455-1,ID=B16_464-2,ID=B16_464-1,ID=B16_487-4,ID=B16_487-2,ID=B16_498-1,ID=B16_460-1,ID=EL4_45-1,ID=B16_474-3,ID=B16_474-4,ID=EL4PD1_114-1,ID=B16_486-3,ID=EL4_67-2,ID=B16_489-1,ID=B16_450-3,ID=B16_499-1,ID=B16_462-4,ID=EL4_65-1,ID=EL4_44-2,ID=EL4_54-2,ID=B16_491-3	NA	NA
1700008O03Rik	chr7	44362682	44385684	-	6	2.89855	0.000920691	0.00771165	6 [6,0]	0 [0,0]	1	ID=EL4_26_4,ID=B16_498-2,ID=B16PD1_533_3,ID=EL4_32_2,ID=B16_520-1,ID=LLC_167-1	NA	NA
Leprot	chr4	101647718	101659364	+	5	2.41546	0.000926787	0.00774815	4 [3,1]	1 [1,0]	1	ID=B16_487-2,ID=B16_474-4,ID=B16_450-3,ID=B16_462-4,ID=B16_491-3	NA	NA
Cntn1	chr15	92051165	92341967	+	12	5.7971	0.000930823	0.00777159	12 [4,8]	0 [0,0]	1	ID=B16_463-1,ID=B16_488-3,ID=B16_464-1,ID=B16_485-1,ID=B16_460-1,ID=B16_474-3,ID=B16_497-1,ID=B16_499-1,ID=B16_13-1,ID=EL4PD1_152-2,ID=B16_474-1,ID=B16_491-2	NA	NA
Sptlc3	chr2	139493920	139637674	+	2	0.966184	0.000931335	0.00777159	2 [2,0]	0 [0,0]	1	ID=B16_464-2,ID=B16_450-3	NA	NA
Serpinb3b	chr1	107153961	107278361	-	23	11.1111	0.000940654	0.00782667	23 [14,9]	0 [0,0]	0.999698	ID=B16_463-1,ID=EL4_28_4,ID=EL4_28_1,ID=B16_464-1,ID=B16_487-4,ID=B16_487-2,ID=B16_498-1,ID=B16_502-3,ID=EL4_49-1,ID=B16_460-1,ID=B16_474-4,ID=EL4_19_2,ID=EL4_27_3,ID=EL4_32_3,ID=EL4_33_2,ID=EL4_32_2,ID=B16_485-4,ID=B16_489-1,ID=B16_450-3,ID=B16_449-3,ID=B16_499-1,ID=B16_451-5,ID=EL4_29_2	NA	NA
Olfr986	chr9	40180920	40190134	+	5	2.41546	0.000946384	0.00786037	4 [4,0]	1 [0,1]	1	ID=B16_463-1,ID=B16_464-2,ID=B16_498-2,ID=EL4_55-2,ID=B16_450-3	NA	NA
Adam22	chr5	8072352	8368081	-	11	5.31401	0.000947629	0.00786338	11 [5,6]	0 [0,0]	1	ID=B16_485-1,ID=B16_485-3,ID=B16_460-1,ID=EL4PD1_104-1,ID=B16_474-3,ID=B16_485-4,ID=B16_450-3,ID=B16_462-4,ID=EL4_72-3,ID=B16_499-2,ID=B16_491-3	NA	NA
Eps8	chr6	137477245	137649285	-	2	0.966184	0.000952522	0.00789663	2 [1,1]	0 [0,0]	1	ID=B16_463-1,ID=EL4_62-1	NA	NA
Fars2	chr13	36117411	36537592	+	18	8.69565	0.000961098	0.00794693	18 [11,7]	0 [0,0]	1	ID=B16PD1_534_3,ID=B16PD1_534_2,ID=B16_464-2,ID=B16_464-1,ID=B16_498-1,ID=B16_502-3,ID=B16_460-1,ID=B16_16-3,ID=B16_474-4,ID=EL4PD1_150-2,ID=EL4PD1_157-2,ID=B16_489-1,ID=B16_450-3,ID=B16_499-1,ID=B16_462-4,ID=B16_499-2,ID=B16_491-3,ID=B16_516-2	NA	NA
Tmem268	chr4	63558781	63586357	+	6	2.89855	0.00095982	0.00794693	6 [1,5]	0 [0,0]	1	ID=B16_464-2,ID=B16_464-1,ID=B16_502-3,ID=B16_474-3,ID=B16_489-1,ID=B16_462-4	NA	NA
Cnbd1	chr4	18860454	19122526	-	44	21.256	0.00100124	0.00826213	42 [21,21]	2 [1,1]	0.999721	ID=B16_463-1,ID=EL4_28_4,ID=B16_488-3,ID=EL4PD1_116-1,ID=EL4_63-1,ID=B16_464-2,ID=B16_485-1,ID=B16_487-4,ID=B16_485-3,ID=B16_498-1,ID=LLC_168-1,ID=EL4_18_2,ID=B16_502-3,ID=B16_460-1,ID=B16_16-2,ID=B16_474-3,ID=B16_474-4,ID=B16_16-4,ID=B16_497-1,ID=B16_486-3,ID=EL4PD1_115-3,ID=B16_485-4,ID=EL4_64-1,ID=B16_517-1,ID=B16_1-2,ID=B16_489-1,ID=B16_450-3,ID=B16_449-4,ID=B16_451-5,ID=B16_451-3,ID=B16_462-…	NA	NA
Atp5o	chr16	91684398	91926982	-	4	1.93237	0.00100474	0.00828332	4 [1,3]	0 [0,0]	1	ID=B16_485-1,ID=B16_460-1,ID=B16_474-3,ID=B16_499-1	NA	NA
Zmat4	chr8	23669658	24156585	+	21	10.1449	0.00101382	0.00835045	21 [5,16]	0 [0,0]	0.980859	ID=EL4_28_2,ID=B16_488-3,ID=EL4_26_4,ID=B16_464-2,ID=B16_464-1,ID=B16_485-1,ID=B16_450-1,ID=B16_502-3,ID=B16_474-4,ID=B16_486-3,ID=B16_485-4,ID=EL4_67-2,ID=EL4_64-5,ID=B16_489-1,ID=B16_449-4,ID=B16_499-1,ID=B16_451-3,ID=B16_475-1,ID=EL4_65-1,ID=B16_499-2,ID=B16_516-2	NA	NA
Ak5	chr3	152462815	152668360	-	3	1.44928	0.00101858	0.00838188	3 [0,3]	0 [0,0]	1	ID=B16_464-1,ID=B16_502-3,ID=B16_462-4	NA	NA
Pramef6	chr4	143894237	143900380	-	4	1.93237	0.00102693	0.00842722	2 [1,1]	2 [2,0]	1	ID=B16_455-2,ID=B16_474-3,ID=EL4PD1_115-3,ID=B16_474-1	NA	NA
Cfap57	chr4	118554551	118620777	-	11	5.31401	0.00102913	0.00843667	11 [6,5]	0 [0,0]	1	ID=B16_485-1,ID=B16_498-1,ID=B16_502-3,ID=EL4PD1_115-2,ID=EL4_52-5,ID=B16_451-5,ID=EL4_62-1,ID=B16_474-1,ID=B16_484-4,ID=B16_484-1,ID=B16_499-2	NA	NA
Efhc2	chrX	17132049	17319368	-	6	2.89855	0.00102997	0.00843667	6 [2,4]	0 [0,0]	1	ID=B16_474-4,ID=EL4_64-2,ID=B16_462-4,ID=EL4_65-1,ID=B16_474-1,ID=B16_484-1	NA	NA
Col14a1	chr15	55307750	55520803	+	5	2.41546	0.00105437	0.00862068	5 [3,2]	0 [0,0]	1	ID=B16_498-1,ID=B16_460-1,ID=B16_474-5,ID=B16_497-1,ID=B16_484-4	NA	NA
Prkca	chr11	107933387	108343928	-	13	6.28019	0.00107837	0.0087847	13 [8,5]	0 [0,0]	1	ID=B16_488-3,ID=B16_464-1,ID=B16_485-1,ID=B16_498-1,ID=B16_502-3,ID=B16_485-2,ID=B16_474-3,ID=B16_474-4,ID=B16_486-3,ID=B16_499-1,ID=B16_451-5,ID=B16_484-1,ID=B16_499-2	NA	NA
Ehbp1	chr11	22005828	22286795	-	12	5.7971	0.00107789	0.0087847	12 [5,7]	0 [0,0]	1	ID=B16_463-1,ID=B16_464-1,ID=EL4PD1_116-3,ID=B16_485-3,ID=B16_487-2,ID=B16_502-3,ID=B16_474-5,ID=B16_499-1,ID=B16_451-3,ID=EL4_62-1,ID=LLC_170-1,ID=B16_484-2	NA	NA
Vwc2l	chr1	70725715	70885397	+	29	14.0097	0.00108941	0.00884225	28 [17,11]	1 [1,0]	0.981507	ID=B16_463-1,ID=EL4_28_3,ID=B16_488-3,ID=B16_464-2,ID=B16_464-1,ID=B16_485-1,ID=B16_487-4,ID=B16_498-2,ID=B16_498-1,ID=B16_519-3,ID=B16_519-1,ID=B16_460-1,ID=B16_474-4,ID=EL4_32_3,ID=EL4_55-2,ID=EL4PD1_113-1,ID=EL4_67-2,ID=EL4_64-5,ID=EL4_36_2,ID=B16_489-1,ID=B16_499-1,ID=B16_518-2,ID=B16_475-2,ID=EL4_65-1,ID=EL4_54-2,ID=B16_499-2,ID=B16_515-2,ID=LLC_167-1,ID=B16_474-2	NA	NA
Ccdc178	chr18	21810897	22171396	-	18	8.69565	0.00110629	0.00897108	18 [7,11]	0 [0,0]	1	ID=B16_463-1,ID=B16_488-3,ID=B16_464-1,ID=LLC_173-3,ID=B16_498-1,ID=B16_502-3,ID=B16_460-1,ID=B16_485-2,ID=B16_474-3,ID=B16_474-4,ID=B16_474-5,ID=B16_454-3,ID=B16_489-1,ID=EL4_70-2,ID=B16_499-1,ID=B16_451-5,ID=B16_462-4,ID=B16_474-1	NA	NA
Pole3	chr4	62522649	62525068	-	3	1.44928	0.0011091	0.00898569	3 [2,1]	0 [0,0]	1	ID=B16_464-1,ID=B16_498-1,ID=B16_502-1	NA	NA
App	chr16	84954440	85173707	-	5	2.41546	0.00112751	0.00912659	5 [2,3]	0 [0,0]	1	ID=B16_450-1,ID=B16_474-3,ID=EL4_64-5,ID=B16_491-3,ID=B16_474-2	NA	NA
Sdc3	chr4	130792537	130826319	+	6	2.89855	0.00112994	0.00913793	4 [2,2]	2 [1,1]	1	ID=B16_498-2,ID=EL4_48-4,ID=B16_450-3,ID=B16_449-4,ID=B16_13-3,ID=B16_451-3	NA	NA
AC162931.1	chr9	17501968	17502709	-	3	1.44928	0.00113156	0.00914274	0 [0,0]	3 [3,0]	1	ID=B16_464-2,ID=B16_460-1,ID=B16_474-3	NA	NA
Mad1l1	chr5	140008689	140321552	-	5	2.41546	0.00114255	0.00922316	5 [2,3]	0 [0,0]	1	ID=B16_485-3,ID=B16_474-3,ID=B16_499-1,ID=B16_499-2,ID=B16_491-3	NA	NA
Slc31a2	chr4	62262562	62297355	+	8	3.86473	0.00115163	0.00928808	8 [6,2]	0 [0,0]	1	ID=B16_502-3,ID=B16_12-3,ID=B16_16-2,ID=B16_474-3,ID=B16_16-4,ID=B16_13-3,ID=B16_484-2,ID=B16_515-1	NA	NA
2010111I01Rik	chr13	63015493	63302877	+	7	3.38164	0.00115808	0.00933166	7 [7,0]	0 [0,0]	1	ID=B16_464-2,ID=B16_502-3,ID=EL4_22_3,ID=B16_486-3,ID=B16_489-1,ID=B16_450-3,ID=EL4_61-2	NA	NA
Stxbp6	chr12	44852484	45074709	-	7	3.38164	0.00116784	0.00939333	7 [3,4]	0 [0,0]	1	ID=B16PD1_534_2,ID=B16_488-3,ID=B16_498-1,ID=B16PD1_537_2,ID=B16_474-4,ID=EL4_59-1,ID=B16_491-3	NA	NA
Syne2	chr12	75818318	76110926	+	8	3.86473	0.00116938	0.00939719	8 [4,4]	0 [0,0]	1	ID=B16_463-1,ID=B16_488-3,ID=B16_464-1,ID=B16_474-3,ID=B16PD1_531_1,ID=EL4_67-2,ID=B16_462-4,ID=EL4PD1_118-1	NA	NA
Adamts17	chr7	66839813	67153171	+	8	3.86473	0.00117735	0.00943712	8 [5,3]	0 [0,0]	1	ID=B16_463-1,ID=B16_464-1,ID=B16_487-4,ID=B16_450-1,ID=B16_498-1,ID=B16_474-4,ID=B16_462-4,ID=B16_491-3	NA	NA
Klf12	chr14	99874486	100149764	-	10	4.83092	0.00120273	0.00963048	10 [8,2]	0 [0,0]	1	ID=B16_488-3,ID=B16_485-1,ID=LLC_173-3,ID=B16_474-4,ID=EL4_67-2,ID=B16_449-4,ID=B16_499-1,ID=B16_484-2,ID=EL4PD1_117-1,ID=B16_499-2	NA	NA
Olfr1331	chr4	118864649	118871707	+	4	1.93237	0.00120749	0.00965992	3 [2,1]	1 [0,1]	1	ID=B16_502-3,ID=B16_474-3,ID=B16_462-4,ID=EL4_62-1	NA	NA
Grm3	chr5	9485541	9725170	-	9	4.34783	0.00120985	0.00967013	9 [3,6]	0 [0,0]	1	ID=EL4_41-1,ID=B16_463-1,ID=B16_464-2,ID=B16_460-1,ID=B16PD1_537_1,ID=B16_485-2,ID=B16_449-4,ID=B16_474-1,ID=B16_491-2	NA	NA
Nalcn	chr14	123276641	123627144	-	17	8.21256	0.0012167	0.00970744	17 [12,5]	0 [0,0]	1	ID=EL4_60-2,ID=B16_464-2,ID=B16_464-1,ID=B16_460-1,ID=B16PD1_537_4,ID=B16_474-3,ID=B16_474-4,ID=EL4_19_2,ID=B16_485-4,ID=EL4_67-2,ID=B16_489-1,ID=B16_522-2,ID=B16_499-1,ID=EL4_62-1,ID=B16_484-4,ID=B16_524-2,ID=B16_499-2	NA	NA
Ivns1abp	chr1	151344477	151364422	+	7	3.38164	0.0012209	0.00973226	6 [2,4]	1 [0,1]	0.999535	ID=B16_463-1,ID=B16PD1_161-4,ID=EL4PD1_154-1,ID=B16_499-1,ID=B16_462-4,ID=B16PD1_163-1,ID=EL4_65-1	NA	NA
4931428L18Rik	chr1	31135226	31222597	-	18	8.69565	0.00124995	0.00993715	17 [6,11]	1 [0,1]	1	ID=B16_463-1,ID=EL4_28_4,ID=EL4_28_1,ID=B16_488-3,ID=B16_464-1,ID=B16_485-1,ID=B16_498-1,ID=B16_460-1,ID=EL4_45-1,ID=B16PD1_537_4,ID=EL4_19_2,ID=EL4_32_3,ID=EL4PD1_150-2,ID=EL4_67-2,ID=B16_499-1,ID=B16_462-4,ID=EL4_29_2,ID=B16_491-3	NA	NA
Ppp2r2b	chr18	42645269	43059471	-	18	8.69565	0.00124943	0.00993715	18 [12,6]	0 [0,0]	1	ID=B16_488-3,ID=B16_464-2,ID=B16_464-1,ID=B16_487-4,ID=B16_485-3,ID=B16_487-2,ID=B16_498-1,ID=B16_502-3,ID=B16_460-1,ID=B16_474-3,ID=B16_474-4,ID=B16_451-5,ID=B16_451-3,ID=B16_518-2,ID=B16_462-4,ID=B16_484-4,ID=EL4_54-2,ID=B16_491-3	NA	NA
Spag17	chr3	99885417	100143322	+	8	3.86473	0.00124875	0.00993715	8 [4,4]	0 [0,0]	1	ID=B16_463-1,ID=B16_502-3,ID=B16_497-1,ID=EL4_36_3,ID=B16_489-1,ID=EL4PD1_105-2,ID=B16_484-2,ID=EL4_54-2	NA	NA
Prune2	chr19	16956118	17223932	+	8	3.86473	0.00126295	0.0100316	8 [3,5]	0 [0,0]	1	ID=B16_488-3,ID=B16_464-1,ID=B16_498-1,ID=B16_502-3,ID=B16_474-3,ID=B16_474-4,ID=B16_497-1,ID=EL4PD1_117-3	NA	NA
Gcm1	chr9	78051924	78065624	+	5	2.41546	0.00126942	0.010065	4 [4,0]	1 [0,1]	1	ID=EL4_28_3,ID=EL4_18_2,ID=B16_474-3,ID=EL4_27_3,ID=EL4_29_2	NA	NA
AW554918	chr18	25169010	25467316	+	13	6.28019	0.00127088	0.0100676	13 [5,8]	0 [0,0]	1	ID=B16_464-1,ID=B16_502-3,ID=B16_460-1,ID=EL4_46-2,ID=B16_474-4,ID=EL4PD1_114-1,ID=B16PD1_531_2,ID=EL4_39-4,ID=EL4_64-1,ID=B16_499-1,ID=EL4_47-1,ID=B16_484-2,ID=B16_491-3	NA	NA
Gabrb2	chr11	42419757	42629028	+	8	3.86473	0.00127442	0.0100778	8 [4,4]	0 [0,0]	1	ID=B16_463-1,ID=B16_498-1,ID=B16_485-2,ID=B16_474-3,ID=B16_499-1,ID=B16_462-4,ID=B16_484-1,ID=B16_491-3	NA	NA
Krtap6-1	chr16	89031699	89032292	+	3	1.44928	0.00127371	0.0100778	1 [1,0]	2 [0,2]	1	ID=B16_450-3,ID=B16_451-5,ID=B16_475-1	NA	NA
Slc44a5	chr3	153973436	154271722	+	9	4.34783	0.00129108	0.0101831	9 [6,3]	0 [0,0]	1	ID=B16_463-1,ID=B16_487-4,ID=B16_498-1,ID=B16_460-1,ID=B16_474-4,ID=EL4_67-3,ID=B16_475-1,ID=B16_524-1,ID=B16_499-2	NA	NA
Tfap2b	chr1	19208914	19238576	+	8	3.86473	0.00128949	0.0101831	8 [4,4]	0 [0,0]	1	ID=B16_464-1,ID=B16_485-1,ID=B16_498-1,ID=B16_486-3,ID=EL4PD1_157-1,ID=B16_489-1,ID=B16_499-1,ID=EL4_65-1	NA	NA
Nr3c2	chr8	76899772	77245012	+	14	6.76329	0.00130617	0.0102923	13 [6,7]	1 [1,0]	1	ID=B16_463-1,ID=B16_464-1,ID=B16_498-1,ID=B16_502-3,ID=B16_474-3,ID=B16_474-4,ID=EL4_32_3,ID=EL4_34_5,ID=B16_521-1,ID=B16_489-1,ID=B16_449-4,ID=B16_499-1,ID=B16_484-1,ID=EL4_54-2	NA	NA
Asap1	chr15	64088539	64382919	-	8	3.86473	0.00131638	0.0103636	8 [5,3]	0 [0,0]	1	ID=B16_464-1,ID=B16_502-3,ID=B16_489-1,ID=B16_450-3,ID=B16_499-1,ID=LLC_170-1,ID=EL4_54-3,ID=B16_491-2	NA	NA
Pou6f2	chr13	18121098	18382041	-	9	4.34783	0.00132621	0.0104226	8 [4,4]	1 [1,0]	1	ID=B16_464-1,ID=B16_487-4,ID=B16_450-1,ID=EL4_18_2,ID=B16_474-3,ID=B16_489-1,ID=B16_499-1,ID=EL4_62-1,ID=B16_484-2	NA	NA
Slc10a7	chr8	78509352	78734003	+	5	2.41546	0.00133589	0.0104894	5 [3,2]	0 [0,0]	1	ID=B16_464-2,ID=B16_487-4,ID=B16_474-3,ID=B16_499-1,ID=B16_451-5	NA	NA
Rfx3	chr19	27766441	28011048	-	11	5.31401	0.00134535	0.0105544	11 [7,4]	0 [0,0]	1	ID=B16_463-1,ID=B16_450-1,ID=B16_498-1,ID=B16_460-1,ID=B16_474-3,ID=B16_474-4,ID=EL4_59-1,ID=EL4_67-1,ID=B16_489-1,ID=B16_451-5,ID=B16_499-2	NA	NA
Usp9y	chrY	1298961	1459782	-	5	2.41546	0.00135469	0.010609	5 [1,4]	0 [0,0]	1	ID=B16_488-3,ID=B16_498-1,ID=B16_485-4,ID=B16_499-1,ID=B16_491-3	NA	NA
Gcm2	chr13	41101427	41109988	-	4	1.93237	0.00135841	0.0106288	1 [0,1]	3 [0,3]	1	ID=B16_463-1,ID=B16_455-1,ID=B16_101NT-3,ID=B16_456-4	NA	NA
Zfp521	chr18	13687013	13972733	-	9	4.34783	0.00136024	0.0106338	9 [5,4]	0 [0,0]	1	ID=B16_463-1,ID=B16_464-2,ID=B16_498-1,ID=B16_460-1,ID=B16_474-3,ID=B16_497-1,ID=EL4PD1_150-2,ID=B16_499-1,ID=B16_451-5	NA	NA
Olfr18	chr9	20312152	20336094	-	8	3.86473	0.00137085	0.0107073	8 [3,5]	0 [0,0]	1	ID=B16_474-3,ID=B16_474-4,ID=EL4_32_3,ID=B16PD1_531_1,ID=EL4_67-2,ID=EL4_36_3,ID=B16_449-4,ID=B16_462-4	NA	NA
Stk32b	chr5	37446825	37717171	-	6	2.89855	0.00138238	0.0107879	6 [3,3]	0 [0,0]	1	ID=B16_488-3,ID=B16_464-1,ID=EL4_18_2,ID=EL4PD1_150-2,ID=EL4_36_3,ID=EL4_62-1	NA	NA
Kif6	chr17	49615172	49909847	+	7	3.38164	0.00138497	0.0107978	7 [3,4]	0 [0,0]	1	ID=B16_488-3,ID=B16_502-3,ID=B16_460-1,ID=EL4_22_3,ID=B16_474-4,ID=B16_489-1,ID=B16_475-2	NA	NA
Nhsl1	chr10	18318985	18531973	+	4	1.93237	0.00138607	0.0107978	4 [3,1]	0 [0,0]	1	ID=B16_502-3,ID=B16_474-4,ID=B16_449-4,ID=EL4_61-2	NA	NA
Gas7	chr11	67455437	67683460	+	3	1.44928	0.0013907	0.0108244	3 [1,2]	0 [0,0]	1	ID=B16_463-1,ID=EL4_45-1,ID=B16_451-5	NA	NA
Igkv14-111	chr6	68256389	68256869	+	3	1.44928	0.00140222	0.0109045	0 [0,0]	3 [3,0]	1	ID=B16_475-1,ID=B16_484-2,ID=B16_491-2	NA	NA
Ncoa1	chr12	4247362	4477182	-	8	3.86473	0.0014299	0.0111004	8 [6,2]	0 [0,0]	1	ID=B16_463-1,ID=B16_464-1,ID=B16_502-3,ID=B16PD1_531_2,ID=B16_499-1,ID=EL4_44-2,ID=B16_484-1,ID=EL4_54-2	NA	NA
Olfr912	chr9	38580178	38586876	+	5	2.41546	0.00143986	0.011168	2 [1,1]	3 [2,1]	1	ID=B16_502-3,ID=B16_460-1,ID=EL4PD1_150-2,ID=B16_484-1,ID=B16_491-3	NA	NA
Col4a5	chrX	141475385	141689234	+	9	4.34783	0.00144691	0.0112129	9 [4,5]	0 [0,0]	1	ID=EL4PD1_114-3,ID=B16_498-1,ID=B16_485-2,ID=B16_474-3,ID=B16_474-4,ID=B16_486-3,ID=B16_517-1,ID=B16_489-1,ID=EL4_47-1	NA	NA
Ago1	chr4	126435012	126468583	-	8	3.86473	0.00144839	0.0112146	6 [5,1]	2 [1,1]	1	ID=B16_474-4,ID=B16_474-5,ID=EL4_67-3,ID=B16_462-4,ID=EL4_62-1,ID=B16_484-2,ID=B16_499-2,ID=B16_491-3	NA	NA
Cacnb2	chr2	14604306	14987908	+	18	8.69565	0.0014528	0.011239	18 [11,7]	0 [0,0]	0.947711	ID=B16_463-1,ID=B16_464-1,ID=B16_485-1,ID=EL4PD1_104-1,ID=B16_474-4,ID=B16_474-5,ID=EL4PD1_113-2,ID=EL4PD1_113-1,ID=EL4_67-2,ID=EL4_64-1,ID=B16_475-1,ID=B16_462-4,ID=EL4PD1_104-3,ID=B16PD1_160-3,ID=EL4PD1_105-2,ID=EL4PD1_119-1,ID=B16_499-2,ID=B16_491-3	NA	NA
Bhmt-ps1	chr4	26368984	26370207	-	3	1.44928	0.00145628	0.0112464	0 [0,0]	3 [1,2]	1	ID=B16_485-4,ID=B16_489-1,ID=B16_462-4	NA	NA
Hbb-bh1	chr7	103841637	103843164	-	3	1.44928	0.00145628	0.0112464	0 [0,0]	3 [1,2]	1	ID=B16_464-2,ID=B16_461-1,ID=B16_484-2	NA	NA
Plekhg1	chr10	3740364	3967303	+	6	2.89855	0.00147664	0.0113937	6 [4,2]	0 [0,0]	1	ID=B16_463-1,ID=B16_474-4,ID=B16_497-2,ID=B16_450-3,ID=B16_499-1,ID=B16_520-2	NA	NA
Olfr272	chr4	52910207	52919178	-	5	2.41546	0.00148163	0.0114224	2 [2,0]	3 [1,2]	1	ID=B16_502-3,ID=B16_474-4,ID=B16_499-1,ID=B16_462-4,ID=B16_491-3	NA	NA
D630023F18Rik	chr1	65105285	65123214	-	6	2.89855	0.00148516	0.0114397	5 [1,4]	1 [1,0]	0.998989	ID=B16_464-1,ID=B16_498-1,ID=B16_16-2,ID=EL4PD1_118-2,ID=B16_453-2,ID=B16_17-1	NA	NA
Ltbp1	chr17	75005568	75391767	+	15	7.24638	0.00148823	0.0114534	15 [8,7]	0 [0,0]	0.969402	ID=B16_463-1,ID=B16_464-2,ID=B16_464-1,ID=B16_498-1,ID=LLC_168-1,ID=B16_502-3,ID=B16PD1_537_2,ID=B16_474-3,ID=B16_474-4,ID=EL4_19_2,ID=B16_485-4,ID=B16_499-1,ID=B16_462-4,ID=B16_474-1,ID=B16_499-2	NA	NA
Ajap1	chr4	153373221	153482811	-	13	6.28019	0.00149127	0.011467	13 [7,6]	0 [0,0]	1	ID=B16_464-2,ID=B16_485-3,ID=B16_487-2,ID=B16_485-2,ID=B16_474-4,ID=B16_489-1,ID=B16_450-3,ID=B16_451-5,ID=B16_451-3,ID=B16_475-2,ID=B16_462-4,ID=EL4_62-1,ID=B16_491-3	NA	NA
Rbms1	chr2	60750193	60963192	-	5	2.41546	0.00149838	0.0115117	5 [3,2]	0 [0,0]	0.996613	ID=B16_463-1,ID=B16_474-4,ID=B16_499-1,ID=EL4_65-1,ID=B16_491-3	NA	NA
Thoc2	chrX	41794991	41911901	-	2	0.966184	0.0015015	0.0115257	2 [1,1]	0 [0,0]	1	ID=EL4PD1_114-1,ID=B16_491-3	NA	NA
Esrrg	chr1	187609029	188214386	+	29	14.0097	0.00150597	0.0115501	29 [14,15]	0 [0,0]	0.990361	ID=B16_463-1,ID=EL4_28_3,ID=EL4_60-2,ID=B16_488-3,ID=B16_464-2,ID=B16_464-1,ID=B16_456-4,ID=B16_487-4,ID=B16_487-2,ID=B16_498-1,ID=LLC_171-2,ID=B16_460-1,ID=EL4_45-1,ID=B16_474-4,ID=B16_497-1,ID=EL4_59-1,ID=B16_486-3,ID=EL4PD1_113-1,ID=EL4_32_2,ID=EL4_67-2,ID=B16_489-1,ID=EL4_70-3,ID=B16_499-1,ID=B16_462-4,ID=EL4_44-2,ID=LLC_170-1,ID=B16_484-4,ID=B16_484-1,ID=B16_499-2	NA	NA
Itpr2	chr6	146108299	146502178	-	13	6.28019	0.0015167	0.0116144	13 [7,6]	0 [0,0]	1	ID=B16_463-1,ID=B16_101NT-3,ID=B16_464-1,ID=B16_485-1,ID=B16_487-2,ID=B16_498-1,ID=EL4PD1_149-4,ID=EL4_49-1,ID=B16_460-1,ID=B16_485-4,ID=EL4_64-1,ID=B16_489-1,ID=B16_499-1	NA	NA
Zfhx4	chr3	5218554	5415855	+	7	3.38164	0.00151696	0.0116144	6 [4,2]	1 [1,0]	1	ID=B16_460-1,ID=B16_474-4,ID=EL4_59-1,ID=EL4_64-1,ID=EL4_70-3,ID=B16_499-1,ID=LLC_170-1	NA	NA
Cyp2j12	chr4	96099318	96141152	-	11	5.31401	0.001521	0.0116353	9 [5,4]	2 [0,2]	1	ID=B16_464-2,ID=B16_487-2,ID=B16_502-3,ID=B16_485-2,ID=B16_474-4,ID=B16_489-1,ID=B16_450-3,ID=EL4_62-1,ID=B16_484-1,ID=B16_484-2,ID=B16_491-3	NA	NA
Polr1e	chr4	45018663	45036565	+	5	2.41546	0.00152435	0.0116509	3 [0,3]	2 [0,2]	1	ID=B16_464-2,ID=B16_498-1,ID=B16_474-4,ID=B16_485-4,ID=EL4_65-1	NA	NA
Map3k20	chr2	72285637	72442610	+	2	0.966184	0.00153425	0.0117166	2 [0,2]	0 [0,0]	1	ID=B16_474-4,ID=B16_486-3	NA	NA
Igf1r	chr7	67952827	68233668	+	6	2.89855	0.00153782	0.0117227	6 [4,2]	0 [0,0]	1	ID=B16_463-1,ID=B16_502-3,ID=B16_460-1,ID=EL4_33_2,ID=B16_450-3,ID=B16_499-2	NA	NA
Yrdc	chr4	124850679	124855242	+	3	1.44928	0.00154032	0.0117227	3 [0,3]	0 [0,0]	1	ID=B16_464-2,ID=B16_474-3,ID=B16_499-1	NA	NA
Ldlrad4	chr18	67933257	68255549	+	10	4.83092	0.00156974	0.0119364	10 [7,3]	0 [0,0]	1	ID=B16_463-1,ID=B16_464-2,ID=B16_464-1,ID=B16_487-2,ID=EL4_68-1,ID=LLC_168-1,ID=B16_502-3,ID=EL4PD1_150-2,ID=B16_485-4,ID=B16_489-1	NA	NA
Gria1	chr11	57011810	57330244	+	9	4.34783	0.00157237	0.0119462	9 [5,4]	0 [0,0]	1	ID=B16_502-3,ID=B16_460-1,ID=EL4_67-3,ID=EL4_67-2,ID=B16_1-1,ID=B16_499-1,ID=B16_462-4,ID=B16_474-1,ID=LLC_170-1	NA	NA
Pex5l	chr3	32949954	33143082	-	4	1.93237	0.00157858	0.0119833	4 [2,2]	0 [0,0]	1	ID=B16_464-1,ID=B16_474-4,ID=B16_486-3,ID=B16_462-4	NA	NA
Pgr	chr9	8899833	8968611	+	15	7.24638	0.00158179	0.0119974	15 [12,3]	0 [0,0]	1	ID=B16_464-2,ID=B16_464-1,ID=B16_450-1,ID=B16_498-1,ID=B16_519-3,ID=B16_502-3,ID=B16_485-2,ID=B16_474-3,ID=B16_474-4,ID=B16_485-4,ID=EL4_64-1,ID=B16_489-1,ID=B16_450-3,ID=B16_484-1,ID=B16_491-3	NA	NA
Sema3a	chr5	13125593	13524707	+	26	12.5604	0.00158602	0.0120192	26 [15,11]	0 [0,0]	0.973006	ID=B16_463-1,ID=EL4_28_1,ID=B16_464-2,ID=B16_464-1,ID=EL4_60-1,ID=B16_456-4,ID=B16_487-4,ID=B16_498-2,ID=B16_502-3,ID=B16_460-1,ID=EL4_45-1,ID=EL4_22_3,ID=EL4PD1_104-1,ID=B16_474-3,ID=EL4_32_3,ID=EL4_55-2,ID=EL4_67-2,ID=EL4PD1_119-4,ID=EL4_25_3,ID=B16_450-3,ID=B16_449-4,ID=B16_484-1,ID=B16_484-2,ID=B16_499-2,ID=B16_491-3,ID=B16_491-2	NA	NA
Btrc	chr19	45363734	45533341	+	3	1.44928	0.00159487	0.012076	3 [2,1]	0 [0,0]	1	ID=B16_485-2,ID=B16PD1_161-4,ID=B16_474-4	NA	NA
Nxph1	chr6	8948614	9249032	+	14	6.76329	0.0016012	0.0121137	14 [5,9]	0 [0,0]	1	ID=B16_463-1,ID=EL4_18_2,ID=B16_460-1,ID=EL4_22_3,ID=B16_474-3,ID=EL4_27_3,ID=EL4_34_5,ID=EL4_55-2,ID=EL4_67-2,ID=EL4PD1_157-2,ID=B16_489-1,ID=B16_499-1,ID=B16_462-4,ID=B16_499-2	NA	NA
Phka1	chrX	102513975	102644246	-	2	0.966184	0.00162379	0.0122741	2 [1,1]	0 [0,0]	1	ID=B16_497-1,ID=B16_499-1	NA	NA
Apba2	chr7	64501706	64753878	+	5	2.41546	0.00164292	0.0123872	5 [3,2]	0 [0,0]	1	ID=B16_488-3,ID=B16_464-2,ID=B16_464-1,ID=B16_499-1,ID=B16_484-4	NA	NA
Best1	chr19	9985174	10001633	-	5	2.41546	0.00165833	0.0124815	1 [0,1]	4 [4,0]	1	ID=B16_12-3,ID=B16_16-2,ID=B16_525-2,ID=B16_2-2,ID=B16_13-3	NA	NA
Chchd6	chr6	89383146	89595652	-	4	1.93237	0.00165962	0.0124815	3 [1,2]	1 [0,1]	1	ID=B16_463-1,ID=EL4_28_4,ID=B16_499-1,ID=B16_462-4	NA	NA
Mcc	chr18	44425060	44812182	-	15	7.24638	0.00167629	0.012575	15 [9,6]	0 [-1,1]	1	ID=B16_463-1,ID=EL4_60-2,ID=B16_464-1,ID=EL4_60-1,ID=B16_485-1,ID=B16_450-1,ID=B16_498-1,ID=B16_502-1,ID=B16_474-3,ID=B16_474-4,ID=B16_499-1,ID=B16_451-5,ID=B16_484-1,ID=B16_520-1,ID=LLC_167-1	NA	NA
Myt1l	chr12	29528384	29923213	+	15	7.24638	0.00167512	0.012575	15 [9,6]	0 [0,0]	0.94787	ID=B16_464-2,ID=B16_487-4,ID=B16_460-1,ID=B16_474-4,ID=B16_486-3,ID=EL4PD1_113-1,ID=B16_521-1,ID=B16_489-1,ID=B16_499-1,ID=B16_451-5,ID=B16_451-3,ID=B16_462-4,ID=B16_474-1,ID=B16_484-2,ID=B16_499-2	NA	NA
Defb44-ps	chr1	18210053	18223564	-	6	2.89855	0.00167463	0.012575	2 [1,1]	4 [4,0]	1	ID=B16_463-1,ID=B16_498-1,ID=B16_474-4,ID=EL4PD1_154-1,ID=B16_489-1,ID=B16_499-1	NA	NA
Syt16	chr12	73997661	74273267	+	9	4.34783	0.00171465	0.0128412	9 [7,2]	0 [0,0]	1	ID=B16_464-1,ID=B16_460-1,ID=EL4_45-1,ID=B16_474-3,ID=EL4_67-2,ID=B16_450-3,ID=B16_451-5,ID=B16_475-2,ID=B16_499-2	NA	NA
Rap1gap2	chr11	74383487	74610915	-	3	1.44928	0.00171927	0.0128545	3 [0,3]	0 [0,0]	1	ID=B16_463-1,ID=B16_502-3,ID=B16_451-3	NA	NA
Olfr1537	chr9	39234412	39249994	-	7	3.38164	0.00173245	0.0129419	6 [1,5]	1 [0,1]	1	ID=B16_498-1,ID=EL4_18_2,ID=EL4_22_3,ID=B16_474-3,ID=EL4_64-1,ID=EL4_24_1,ID=B16_462-4	NA	NA
Fam120c	chrX	151344175	151471842	+	2	0.966184	0.00173503	0.0129503	2 [2,0]	0 [0,0]	1	ID=EL4PD1_114-3,ID=B16_484-2	NA	NA
Phldb2	chr16	45757142	45953598	-	5	2.41546	0.00174497	0.0130135	5 [3,2]	0 [0,0]	1	ID=B16_488-3,ID=B16_464-2,ID=B16_464-1,ID=B16_485-3,ID=B16_525-2	NA	NA
Phactr1	chr13	42680623	43138524	+	19	9.17874	0.00176156	0.0131153	19 [9,10]	0 [0,0]	1	ID=B16_463-1,ID=B16_464-1,ID=B16_487-2,ID=B16_450-1,ID=B16_498-2,ID=EL4_45-1,ID=B16_474-4,ID=B16_497-1,ID=B16_497-2,ID=EL4_36_3,ID=B16_489-1,ID=B16_449-4,ID=B16_499-1,ID=B16_451-3,ID=B16_475-1,ID=B16_475-2,ID=B16PD1_160-3,ID=B16_484-4,ID=B16_484-1	NA	NA
Tnfrsf1b	chr4	145213463	145246870	-	7	3.38164	0.00176465	0.0131273	5 [3,2]	2 [0,2]	1	ID=B16_464-2,ID=B16_460-1,ID=B16_474-3,ID=B16_451-3,ID=B16_462-4,ID=EL4_65-1,ID=B16_491-3	NA	NA
Wbscr17	chr5	130872082	131308497	-	17	8.21256	0.00176747	0.0131374	17 [10,7]	0 [0,0]	1	ID=EL4_28_4,ID=EL4_28_2,ID=B16_101NT-3,ID=B16_464-2,ID=B16_502-3,ID=B16_460-1,ID=B16_474-3,ID=B16_474-4,ID=B16_474-5,ID=EL4_27_3,ID=B16_489-1,ID=B16_450-3,ID=EL4_70-2,ID=B16_499-1,ID=EL4_29_2,ID=B16_491-3,ID=B16_491-2	NA	NA
Chm	chrX	113040593	113185517	-	4	1.93237	0.00177082	0.0131513	4 [2,2]	0 [0,0]	1	ID=B16_460-1,ID=B16PD1_537_1,ID=B16_462-4,ID=B16_474-1	NA	NA
Rnf11	chr4	109454284	109484728	-	9	4.34783	0.00178437	0.0132125	9 [6,3]	0 [0,0]	1	ID=B16_488-3,ID=EL4_26_4,ID=B16_464-2,ID=B16_474-4,ID=B16_450-3,ID=B16_451-5,ID=LLC_174-2,ID=EL4_29_2,ID=B16_491-3	NA	NA
AC073947.4	chr9	39084499	39095161	-	5	2.41546	0.001785	0.0132125	2 [2,0]	3 [3,0]	1	ID=EL4PD1_114-3,ID=EL4_45-1,ID=B16_484-1,ID=B16_499-2,ID=B16_491-3	NA	NA
Pramef25	chr4	143948580	143951016	-	3	1.44928	0.00178233	0.0132125	0 [0,0]	3 [2,1]	1	ID=B16_464-2,ID=B16_474-3,ID=B16_489-1	NA	NA
Adcy8	chr15	64699042	64922296	-	7	3.38164	0.00178737	0.0132191	6 [5,1]	1 [0,1]	1	ID=B16_464-1,ID=B16_498-1,ID=B16_460-1,ID=B16_489-1,ID=B16_451-5,ID=B16_462-4,ID=EL4_72-3	NA	NA
Me2	chr18	73770040	73815392	-	10	4.83092	0.00179943	0.0132973	10 [3,7]	0 [0,0]	0.974028	ID=EL4_26_4,ID=EL4_22_3,ID=EL4_19_2,ID=B16_497-2,ID=EL4_32_3,ID=EL4_32_2,ID=EL4_25_3,ID=B16_451-5,ID=B16_462-4,ID=EL4_29_2	NA	NA
Zfp560	chr9	20345136	20385177	-	10	4.83092	0.00182184	0.0134517	9 [5,4]	1 [0,1]	1	ID=B16_464-2,ID=B16_464-1,ID=B16_502-3,ID=EL4_45-1,ID=B16_474-3,ID=EL4PD1_153-3,ID=B16_450-3,ID=B16_499-1,ID=B16_451-5,ID=B16_499-2	NA	NA
Rps6ka5	chr12	100548439	100725120	-	5	2.41546	0.00183472	0.0135021	5 [3,2]	0 [0,0]	1	ID=B16_460-1,ID=B16_525-2,ID=B16_489-1,ID=B16_499-1,ID=B16_491-3	NA	NA
9130011E15Rik	chr19	45818144	45998488	-	3	1.44928	0.00183286	0.0135021	3 [2,1]	0 [0,0]	1	ID=B16_498-1,ID=B16_474-3,ID=EL4_64-1	NA	NA
Plscr5	chr9	92192936	92209772	+	7	3.38164	0.00184162	0.0135417	3 [1,2]	4 [0,4]	1	ID=EL4_49-1,ID=B16_474-3,ID=B16_474-4,ID=EL4PD1_157-2,ID=B16_489-1,ID=B16PD1_160-3,ID=B16_491-3	NA	NA
Olfr636-ps1	chr7	103989102	103990036	-	3	1.44928	0.00184705	0.0135544	1 [0,1]	2 [2,0]	1	ID=B16PD1_534_3,ID=B16_474-4,ID=EL4_36_3	NA	NA
Olfr850	chr9	19477301	19478248	-	3	1.44928	0.00184705	0.0135544	0 [0,0]	3 [1,2]	1	ID=B16_464-2,ID=B16_502-3,ID=B16_474-3	NA	NA
Ola1	chr2	73092801	73214447	-	2	0.966184	0.00184791	0.0135544	2 [0,2]	0 [0,0]	1	ID=B16_463-1,ID=B16_474-4	NA	NA
Fstl4	chr11	52764634	53188538	+	13	6.28019	0.00185601	0.0135874	13 [5,8]	0 [0,0]	1	ID=EL4_28_4,ID=B16_464-2,ID=B16_464-1,ID=B16_456-4,ID=B16_487-4,ID=B16_487-2,ID=B16_498-1,ID=B16_497-2,ID=B16_489-1,ID=B16_499-1,ID=B16_451-3,ID=B16_520-1,ID=B16_474-2	NA	NA
Chsy3	chr18	59175401	59410446	+	9	4.34783	0.00185699	0.0135874	9 [9,0]	0 [0,0]	1	ID=B16_464-1,ID=B16_450-1,ID=EL4PD1_115-3,ID=B16_485-4,ID=EL4_36_3,ID=B16_499-1,ID=EL4PD1_118-2,ID=B16_474-1,ID=B16_491-3	NA	NA
Yod1	chr1	130717327	130724358	+	4	1.93237	0.00185495	0.0135874	4 [3,1]	0 [0,0]	1	ID=B16_463-1,ID=B16_487-4,ID=B16_498-1,ID=B16_499-2	NA	NA
Ripk2	chr4	16122733	16163647	-	11	5.31401	0.00185918	0.0135923	11 [5,6]	0 [0,0]	1	ID=B16_464-2,ID=B16_464-1,ID=LLC_173-3,ID=EL4_70-1,ID=B16_485-2,ID=B16_474-3,ID=B16_521-2,ID=B16_462-4,ID=EL4PD1_117-3,ID=B16_499-2,ID=B16_491-3	NA	NA
Rttn	chr18	88971790	89131013	+	5	2.41546	0.00187043	0.0136522	5 [2,3]	0 [0,0]	1	ID=EL4_41-1,ID=B16_487-2,ID=B16_474-4,ID=EL4_36_3,ID=B16_462-4	NA	NA
Psip1	chr4	83455680	83486459	-	9	4.34783	0.00187706	0.0136893	8 [5,3]	1 [0,1]	0.826608	ID=B16_485-3,ID=B16_474-3,ID=B16_474-4,ID=B16_485-4,ID=B16_489-1,ID=B16_451-5,ID=B16_462-4,ID=EL4_72-3,ID=B16_491-3	NA	NA
Nebl	chr2	17343909	17731043	-	18	8.69565	0.00189614	0.0138172	18 [7,11]	0 [0,0]	1	ID=B16_463-1,ID=B16_464-2,ID=B16_519-3,ID=B16_474-3,ID=B16_474-4,ID=B16_497-1,ID=B16_486-3,ID=B16_525-1,ID=B16_521-1,ID=B16_489-1,ID=B16_522-2,ID=B16_450-3,ID=B16_499-1,ID=B16_451-5,ID=B16_518-2,ID=LLC_170-1,ID=EL4PD1_117-3,ID=B16_491-3	NA	NA
Dram2	chr3	106547798	106575890	+	9	4.34783	0.00190301	0.0138559	9 [7,2]	0 [0,0]	1	ID=B16_463-1,ID=B16_488-3,ID=B16_464-1,ID=B16_498-2,ID=EL4_18_2,ID=EL4_19_2,ID=B16_521-2,ID=EL4_36_2,ID=B16_461-1	NA	NA
Abca13	chr11	9191942	9684259	+	27	13.0435	0.00191159	0.013907	27 [17,10]	0 [0,0]	1	ID=B16_463-1,ID=B16_488-3,ID=EL4_26_4,ID=B16_464-2,ID=B16_464-1,ID=B16_487-4,ID=B16_485-3,ID=EL4_49-1,ID=B16_460-1,ID=B16_16-3,ID=B16_474-3,ID=B16_474-4,ID=B16_474-5,ID=B16_497-1,ID=EL4PD1_113-1,ID=EL4_32_2,ID=B16PD1_532_1,ID=EL4_38_3,ID=B16_489-1,ID=B16_451-5,ID=B16_453-2,ID=B16_451-3,ID=EL4_65-1,ID=B16_484-2,ID=B16_451-4,ID=B16_499-2,ID=B16_491-3	NA	NA
Olfr271-ps1	chr4	52935430	52936381	-	3	1.44928	0.00191352	0.0139097	0 [0,0]	3 [2,1]	1	ID=B16_464-2,ID=B16_462-4,ID=B16_484-2	NA	NA
Ar	chrX	98148769	98323215	+	6	2.89855	0.00191896	0.0139379	6 [1,5]	0 [0,0]	1	ID=B16_460-1,ID=EL4_70-1,ID=B16_474-3,ID=B16_489-1,ID=B16_474-1,ID=B16_516-2	NA	NA
Ralgps1	chr2	33133421	33371486	-	3	1.44928	0.00193237	0.0140239	3 [1,2]	0 [0,0]	1	ID=B16_463-1,ID=B16_464-1,ID=B16_498-1	NA	NA
Mef2c	chr13	83504240	83667078	+	5	2.41546	0.00194091	0.0140744	5 [3,2]	0 [0,0]	1	ID=B16_488-3,ID=B16_464-2,ID=B16_464-1,ID=LLC_171-2,ID=B16_499-1	NA	NA
Tbcc	chr17	46890684	46891847	+	2	0.966184	0.00195467	0.0141626	0 [0,0]	2 [1,1]	1	ID=B16_451-5,ID=EL4_48-1	NA	NA
Frmpd1	chr4	45184906	45285936	+	15	7.24638	0.00198996	0.0144066	15 [10,5]	0 [-1,1]	1	ID=B16_464-2,ID=B16_485-1,ID=B16_498-1,ID=B16_474-4,ID=EL4PD1_115-3,ID=EL4_64-2,ID=B16_489-1,ID=B16_450-3,ID=B16_499-1,ID=B16_451-5,ID=B16_462-4,ID=EL4_65-1,ID=EL4_47-1,ID=B16_484-4,ID=B16_499-2	NA	NA
Olfr648	chr7	104177598	104183392	-	4	1.93237	0.00201619	0.0145792	4 [4,0]	0 [0,0]	0.984536	ID=B16PD1_534_3,ID=B16PD1_533_3,ID=B16PD1_531_1,ID=EL4_36_4	NA	NA
Zdhhc25	chr15	88600302	88601669	+	2	0.966184	0.00201707	0.0145792	0 [0,0]	2 [0,2]	1	ID=B16_488-3,ID=B16_474-4	NA	NA
Ttc28	chr5	110879803	111289780	+	13	6.28019	0.00204247	0.0147508	12 [4,8]	1 [0,1]	1	ID=B16_463-1,ID=B16_464-2,ID=B16_464-1,ID=B16_485-1,ID=B16_474-4,ID=EL4_32_3,ID=B16_486-3,ID=B16_489-1,ID=B16_499-1,ID=B16_461-1,ID=B16_475-2,ID=B16_474-1,ID=B16_499-2	NA	NA
Tead1	chr7	112679320	112906807	+	4	1.93237	0.00207453	0.0149702	4 [3,1]	0 [0,0]	1	ID=B16_101NT-3,ID=B16_487-4,ID=B16_484-1,ID=B16_491-3	NA	NA
Il33	chr19	29925114	29960718	+	9	4.34783	0.00208353	0.0150108	9 [6,3]	0 [0,0]	0.909556	ID=B16_3-4,ID=B16_456-4,ID=B16_487-4,ID=B16_16-3,ID=B16_16-2,ID=EL4_32_3,ID=B16_453-2,ID=B16_5-2,ID=B16_14-1	NA	NA
Galnt18	chr7	111471661	111779977	-	8	3.86473	0.00208343	0.0150108	8 [3,5]	0 [0,0]	1	ID=B16_464-1,ID=B16_498-1,ID=B16_502-3,ID=B16_460-1,ID=B16_485-2,ID=B16_475-2,ID=B16_462-4,ID=B16_491-3	NA	NA
Mrpl37	chr4	107055874	107066868	-	4	1.93237	0.00208848	0.0150343	3 [2,1]	1 [0,1]	1	ID=B16_474-3,ID=B16_451-3,ID=B16_484-2,ID=B16_491-2	NA	NA
Megf9	chr4	70427065	70534928	-	22	10.628	0.00209824	0.0150746	20 [8,12]	2 [1,1]	0.978441	ID=EL4_28_3,ID=B16_488-3,ID=B16_464-2,ID=B16_485-1,ID=B16_485-3,ID=B16_502-3,ID=B16_485-2,ID=B16_474-3,ID=B16_474-4,ID=EL4_19_2,ID=EL4PD1_150-2,ID=B16_489-1,ID=B16_450-3,ID=B16_451-5,ID=B16_462-3,ID=B16_462-4,ID=EL4_62-1,ID=B16_484-1,ID=B16_484-2,ID=B16_499-2,ID=B16_491-3,ID=B16_491-2	NA	NA
Rdh11	chr12	79174337	79192293	-	6	2.89855	0.00209594	0.0150746	2 [1,1]	4 [2,2]	1	ID=B16_464-1,ID=B16_487-2,ID=B16_450-1,ID=B16_502-1,ID=B16_485-4,ID=B16_491-2	NA	NA
Srbd1	chr17	85984665	86145175	-	3	1.44928	0.00209914	0.0150746	3 [0,3]	0 [0,0]	1	ID=EL4_49-1,ID=B16_497-1,ID=B16_451-3	NA	NA
Elp4	chr2	105701027	105904564	-	8	3.86473	0.00210676	0.015107	8 [5,3]	0 [0,0]	1	ID=B16_463-1,ID=EL4_28_1,ID=EL4_68-1,ID=B16PD1_537_1,ID=B16_474-3,ID=B16_474-4,ID=B16_2-2,ID=EL4PD1_157-2	NA	NA
Ptp4a2	chr4	129820221	129849978	+	8	3.86473	0.00210704	0.015107	7 [2,5]	1 [1,0]	1	ID=B16_487-4,ID=B16_502-3,ID=B16_474-4,ID=EL4_67-4,ID=B16_451-5,ID=B16_475-2,ID=B16_462-4,ID=EL4_54-2	NA	NA
Slc44a1	chr4	53440413	53622478	+	28	13.5266	0.00212009	0.0151883	28 [16,12]	0 [0,0]	1	ID=B16_455-1,ID=EL4_63-1,ID=B16_464-2,ID=EL4_60-1,ID=B16_485-3,ID=B16_498-1,ID=B16_502-3,ID=B16_460-1,ID=EL4_70-1,ID=B16_474-3,ID=B16_474-4,ID=B16_485-4,ID=EL4_67-4,ID=EL4_67-3,ID=EL4_64-1,ID=B16_450-3,ID=B16_449-4,ID=B16_451-5,ID=B16_451-3,ID=B16_5-2,ID=B16_462-4,ID=EL4_47-1,ID=B16_484-1,ID=EL4_54-2,ID=B16_499-2,ID=B16_515-1,ID=B16_491-3,ID=B16_491-2	NA	NA
Olfr1478-ps1	chr19	13505325	13505715	+	3	1.44928	0.0021237	0.015202	0 [0,0]	3 [3,0]	1	ID=EL4PD1_116-3,ID=B16_502-3,ID=EL4_48-1	NA	NA
Phf21a	chr2	92093117	92364666	+	9	4.34783	0.00213089	0.0152412	9 [9,0]	0 [0,0]	1	ID=B16_101NT-3,ID=B16_485-1,ID=B16_450-1,ID=B16_486-3,ID=B16_485-4,ID=B16PD1_531_1,ID=EL4_36_3,ID=B16_449-3,ID=B16_499-1	predicted cancer driver	NA
Agmo	chr12	37241641	37582202	+	20	9.66184	0.00214483	0.0153258	20 [11,9]	0 [0,0]	1	ID=B16_464-2,ID=B16_485-1,ID=B16_450-1,ID=B16_498-2,ID=LLC_168-1,ID=B16_502-1,ID=B16_452-1,ID=B16_460-1,ID=B16_485-2,ID=B16_474-3,ID=B16_474-4,ID=B16_485-4,ID=B16_499-1,ID=B16_451-5,ID=B16_451-3,ID=B16_462-4,ID=B16_484-1,ID=EL4_72-3,ID=B16_499-2,ID=B16_491-3	NA	NA
AC160337.1	chr9	63898265	63898802	+	2	0.966184	0.00214616	0.0153258	0 [0,0]	2 [0,2]	1	ID=EL4PD1_149-2,ID=EL4_49-1	NA	NA
1500015O10Rik	chr1	43730602	43742578	+	5	2.41546	0.00215359	0.0153665	2 [2,0]	3 [1,2]	1	ID=B16_464-1,ID=B16_498-1,ID=B16_499-1,ID=B16_451-5,ID=B16_484-1	NA	NA
Tmem232	chr17	65256005	65540782	-	11	5.31401	0.00216052	0.0154037	11 [6,5]	0 [0,0]	1	ID=B16_463-1,ID=B16_464-2,ID=B16_485-1,ID=B16PD1_537_1,ID=B16_486-3,ID=B16_485-4,ID=EL4_36_3,ID=B16_450-3,ID=B16_451-3,ID=B16_462-4,ID=B16_484-2	NA	NA
Faf1	chr4	109676588	109963960	+	47	22.7053	0.00217104	0.0154539	47 [24,23]	0 [0,0]	0.996725	ID=EL4PD1_116-2,ID=B16_463-1,ID=B16_488-3,ID=B16_464-2,ID=B16_464-1,ID=B16_485-1,ID=B16_487-4,ID=B16_485-3,ID=B16_487-2,ID=EL4PD1_114-3,ID=B16_498-2,ID=B16_502-3,ID=B16_502-1,ID=B16_460-1,ID=EL4_46-2,ID=B16_12-3,ID=B16_485-2,ID=B16_474-3,ID=B16_474-4,ID=B16_474-5,ID=B16_16-4,ID=B16_497-1,ID=EL4_59-1,ID=B16_486-3,ID=EL4PD1_153-3,ID=B16_485-4,ID=EL4PD1_154-1,ID=EL4_67-4,ID=EL4_64-2,ID=EL4_64-1,ID=B…	NA	NA
C77370	chrX	104077434	104201185	-	2	0.966184	0.00217414	0.0154636	2 [1,1]	0 [0,0]	1	ID=B16_463-1,ID=B16_460-1	NA	NA
Rit2	chr18	30973489	31317290	-	19	9.17874	0.00219151	0.0155626	19 [9,10]	0 [1,-1]	1	ID=B16_464-2,ID=B16_464-1,ID=B16_502-3,ID=B16_460-1,ID=B16_474-3,ID=B16_474-4,ID=B16_474-5,ID=B16_497-1,ID=EL4PD1_150-2,ID=B16_489-1,ID=B16_450-3,ID=B16_522-1,ID=B16_451-5,ID=EL4_48-1,ID=B16_461-1,ID=B16_462-4,ID=LLC_174-1,ID=B16_484-1,ID=B16_491-3	NA	NA
Olfr853	chr9	19534202	19541076	-	5	2.41546	0.00219155	0.0155626	2 [1,1]	3 [1,2]	1	ID=EL4_28_3,ID=EL4_26_4,ID=B16_460-1,ID=B16_474-4,ID=B16_462-4	NA	NA
Ldlrad3	chr2	101950203	102186385	-	4	1.93237	0.00219751	0.0155801	3 [1,2]	1 [1,0]	1	ID=B16_101NT-3,ID=B16_474-4,ID=EL4_55-2,ID=EL4_54-2	NA	NA
Lipo3	chr19	33555167	33761951	-	7	3.38164	0.00221455	0.0156885	7 [2,5]	0 [0,0]	1	ID=B16_464-1,ID=B16_485-1,ID=EL4PD1_114-3,ID=LLC_172-2,ID=EL4_18_2,ID=B16_518-1,ID=B16_491-2	NA	NA
Mamdc2	chr19	23302609	23448322	-	2	0.966184	0.00222139	0.0157244	2 [1,1]	0 [0,0]	1	ID=B16_463-1,ID=B16_474-1	NA	NA
Rpe	chr1	66700831	66719805	+	7	3.38164	0.00222833	0.015761	7 [3,4]	0 [0,0]	0.857838	ID=B16_464-1,ID=B16_498-1,ID=EL4_64-5,ID=B16_521-2,ID=B16_449-3,ID=B16_499-1,ID=EL4_48-1	NA	NA
Crispld1	chr1	17727088	17766344	+	11	5.31401	0.00223264	0.015779	9 [5,4]	2 [0,2]	1	ID=B16_463-1,ID=B16_464-1,ID=EL4PD1_116-3,ID=B16_487-4,ID=B16_498-1,ID=EL4_27_3,ID=EL4_39-4,ID=EL4_67-2,ID=EL4_36_3,ID=B16_489-1,ID=B16_499-1	NA	NA
Gab2	chr7	97081586	97308946	+	8	3.86473	0.00226554	0.0159988	7 [2,5]	1 [0,1]	1	ID=B16_464-2,ID=B16_487-4,ID=B16_498-1,ID=EL4_18_2,ID=EL4_22_3,ID=EL4_59-1,ID=B16_451-3,ID=B16_462-4	NA	NA
Pcca	chr14	122534339	122889944	+	16	7.72947	0.00228567	0.0161027	16 [9,7]	0 [0,0]	1	ID=B16_463-1,ID=B16_488-3,ID=B16_464-2,ID=B16_464-1,ID=EL4PD1_156-2,ID=B16_498-2,ID=B16_502-3,ID=B16_460-1,ID=B16_474-3,ID=B16_474-4,ID=B16_489-1,ID=EL4_70-3,ID=B16_462-4,ID=B16_484-4,ID=B16_484-1,ID=B16_491-3	NA	NA
Pld1	chr3	27938695	28133239	+	4	1.93237	0.00229708	0.0161703	4 [1,3]	0 [0,0]	1	ID=EL4_37_2,ID=B16_489-1,ID=B16_499-1,ID=B16_462-4	NA	NA
Chd9	chr8	90828352	91054516	+	7	3.38164	0.00230254	0.0161959	7 [1,6]	0 [0,0]	1	ID=B16_463-1,ID=B16_464-1,ID=B16_474-3,ID=B16_474-4,ID=B16_450-3,ID=B16_499-1,ID=B16_499-2	predicted cancer driver	NA
Skint8	chr4	111919555	111950358	+	9	4.34783	0.002308	0.0162085	7 [4,3]	2 [2,0]	1	ID=B16_460-1,ID=B16_474-3,ID=B16_474-4,ID=EL4_59-1,ID=B16_489-1,ID=B16_450-3,ID=B16_474-1,ID=B16_484-2,ID=B16_499-2	NA	NA
Ppm1l	chr3	69316861	69560802	+	7	3.38164	0.00230944	0.0162085	6 [4,2]	1 [1,0]	1	ID=B16_488-3,ID=B16_464-2,ID=B16_464-1,ID=B16_502-3,ID=B16_474-3,ID=B16_522-1,ID=B16_475-1	NA	NA
Ccdc94	chr17	55959187	55967949	+	3	1.44928	0.00231161	0.0162085	1 [0,1]	2 [2,0]	1	ID=B16_502-3,ID=B16_485-4,ID=B16_489-1	NA	NA
AC123708.1	chr9	120521813	120522819	+	2	0.966184	0.00235082	0.0164705	0 [0,0]	2 [0,2]	1	ID=EL4_63-1,ID=EL4_45-1	NA	NA
Mcf2	chrX	60055956	60179089	-	2	0.966184	0.00236742	0.0165738	2 [2,0]	0 [0,0]	1	ID=EL4_67-2,ID=EL4_38_3	NA	NA
Ablim1	chr19	57037251	57314919	-	7	3.38164	0.00237963	0.0166462	7 [2,5]	0 [0,0]	1	ID=B16_464-2,ID=B16PD1_537_2,ID=EL4PD1_115-2,ID=B16_499-1,ID=B16PD1_163-1,ID=B16PD1_163-3,ID=B16_499-2	NA	NA
Tmcc3	chr10	94312024	94578796	+	7	3.38164	0.00239749	0.016758	7 [5,2]	0 [0,0]	1	ID=EL4_60-2,ID=B16_464-1,ID=B16_487-2,ID=B16_502-3,ID=B16_497-1,ID=EL4_64-5,ID=B16_451-3	NA	NA
Pde3a	chr6	141249269	141507448	+	10	4.83092	0.00242537	0.0169263	10 [8,2]	0 [0,0]	1	ID=B16_463-1,ID=B16_488-3,ID=B16_498-1,ID=B16_474-4,ID=EL4_48-4,ID=B16_489-1,ID=B16_462-4,ID=EL4_65-1,ID=B16_515-1,ID=B16_516-2	NA	NA
Ttk	chr9	83834690	83872389	+	10	4.83092	0.00243212	0.0169469	8 [3,5]	2 [2,0]	0.988042	ID=B16_485-1,ID=B16_485-3,ID=B16_450-1,ID=B16_502-3,ID=B16_474-4,ID=B16_474-5,ID=B16_485-4,ID=B16_489-1,ID=B16_450-3,ID=B16_474-1	NA	NA
Olfr839-ps1	chr9	19168407	19177312	-	5	2.41546	0.00243035	0.0169469	3 [2,1]	2 [1,1]	1	ID=B16_464-2,ID=B16_486-3,ID=EL4_55-2,ID=B16_489-1,ID=B16_499-1	NA	NA
Slc25a13	chr6	6041219	6217173	-	3	1.44928	0.00243774	0.0169728	3 [2,1]	0 [0,0]	1	ID=B16_498-2,ID=B16_474-3,ID=B16_451-4	NA	NA
Cntnap4	chr8	112570043	112882717	+	14	6.76329	0.0024752	0.0172067	14 [10,4]	0 [0,0]	1	ID=B16_463-1,ID=B16_488-3,ID=B16_450-1,ID=B16_498-2,ID=B16_498-1,ID=EL4_18_2,ID=B16_502-1,ID=B16_460-1,ID=B16_474-3,ID=B16_474-4,ID=B16_474-5,ID=EL4_34_5,ID=B16_462-4,ID=B16_491-2	NA	NA
a	chr2	154791402	155047727	+	8	3.86473	0.00247397	0.0172067	8 [4,4]	0 [0,0]	1	ID=EL4PD1_116-2,ID=B16_464-1,ID=EL4PD1_116-3,ID=EL4_49-1,ID=B16_474-3,ID=B16_489-1,ID=B16_451-3,ID=B16_474-1	NA	NA
Cep128	chr12	90998492	91384409	-	19	9.17874	0.00249849	0.0173446	19 [9,10]	0 [0,0]	1	ID=B16_464-2,ID=B16_464-1,ID=B16_485-1,ID=B16_502-3,ID=B16_502-1,ID=B16_460-1,ID=B16_16-3,ID=B16_474-3,ID=B16_474-4,ID=EL4_27_3,ID=EL4_36_2,ID=B16_489-1,ID=B16_450-3,ID=B16_499-1,ID=B16_451-3,ID=EL4_47-1,ID=B16_484-2,ID=B16_499-2,ID=B16_520-1	NA	NA
Rbfox2	chr15	77078990	77307053	-	6	2.89855	0.00249893	0.0173446	6 [4,2]	0 [0,0]	1	ID=B16_464-1,ID=B16_450-1,ID=B16_460-1,ID=B16_474-4,ID=EL4_43-2,ID=B16_451-3	NA	NA
Tpt1-ps2	chr4	54564623	54565143	+	3	1.44928	0.00251158	0.0173918	0 [0,0]	3 [1,2]	1	ID=B16_462-4,ID=LLC_174-2,ID=EL4_62-1	NA	NA
Myf6	chr10	107492853	107494737	-	3	1.44928	0.00251158	0.0173918	0 [0,0]	3 [2,1]	0.66687	ID=B16_454-3,ID=B16_453-2,ID=EL4_62-1	NA	NA
Cyp2b10	chr7	25897620	25926624	+	7	3.38164	0.00252968	0.0175035	4 [4,0]	3 [0,3]	1	ID=B16PD1_533_1,ID=B16PD1_533_3,ID=EL4_37_2,ID=B16PD1_531_1,ID=B16PD1_532_2,ID=EL4_36_2,ID=EL4_38_3	NA	NA
Samd4b	chr7	28399549	28598144	-	2	0.966184	0.00253502	0.0175269	2 [0,2]	0 [0,0]	1	ID=B16_485-3,ID=B16_450-3	NA	NA
Chst11	chr10	82985498	83195900	+	2	0.966184	0.00253704	0.0175272	2 [1,1]	0 [0,0]	1	ID=B16_502-3,ID=B16_489-1	predicted cancer driver	NA
Sh3bgrl2	chr9	83548327	83638801	+	15	7.24638	0.00254163	0.0175453	15 [8,7]	0 [0,0]	0.960936	ID=EL4_28_4,ID=B16_488-3,ID=B16_464-2,ID=EL4_18_2,ID=B16_460-1,ID=EL4_32_1,ID=B16PD1_537_4,ID=B16_474-3,ID=B16_474-5,ID=EL4_59-1,ID=EL4_64-5,ID=B16_489-1,ID=B16_449-4,ID=B16_451-3,ID=B16_491-3	NA	NA
Map3k5	chr10	19934472	20142753	+	5	2.41546	0.00256879	0.0177191	5 [0,5]	0 [0,0]	0.997141	ID=B16_485-1,ID=B16_487-4,ID=B16_498-1,ID=B16_489-1,ID=B16_475-1	predicted cancer driver	human T-ALL driver
Stard13	chr5	151063546	151233774	-	3	1.44928	0.00257763	0.0177663	3 [0,3]	0 [0,0]	1	ID=B16_498-1,ID=EL4PD1_115-3,ID=B16_489-1	NA	NA
Srprb	chr9	103188032	103202137	-	5	2.41546	0.00262227	0.01806	4 [4,0]	1 [1,0]	1	ID=B16_464-1,ID=EL4_64-5,ID=EL4_64-2,ID=EL4_64-1,ID=EL4_62-1	NA	NA
AC100406.3	chr9	17732670	17733931	+	3	1.44928	0.00263755	0.0181372	0 [0,0]	3 [1,2]	1	ID=B16_464-2,ID=B16_460-1,ID=B16_474-3	NA	NA
Upp2	chr2	58567387	58792971	+	6	2.89855	0.0026627	0.0182819	6 [2,4]	0 [0,0]	1	ID=B16_101NT-3,ID=B16_464-1,ID=B16PD1_537_1,ID=B16_474-3,ID=B16_451-5,ID=B16_474-1	NA	NA
Tmeff1	chr4	48585174	48663131	+	14	6.76329	0.00267386	0.0183444	13 [8,5]	1 [0,1]	0.944719	ID=B16_488-3,ID=B16_464-2,ID=B16_485-3,ID=B16_487-2,ID=B16_450-1,ID=EL4_22_3,ID=B16_474-3,ID=B16_474-4,ID=EL4_27_3,ID=EL4PD1_150-2,ID=B16_489-1,ID=B16_499-1,ID=EL4_47-2,ID=B16_474-1	NA	NA
Nfib	chr4	82290173	82505770	-	32	15.4589	0.0026763	0.0183471	32 [15,17]	0 [0,0]	0.999488	ID=EL4_28_2,ID=B16_488-3,ID=B16_464-2,ID=B16_464-1,ID=EL4PD1_116-3,ID=B16_487-4,ID=B16_487-2,ID=EL4PD1_114-3,ID=B16_450-1,ID=B16_502-3,ID=B16_460-1,ID=B16_474-3,ID=B16_474-4,ID=B16_497-1,ID=EL4PD1_150-2,ID=B16_485-4,ID=B16_489-1,ID=B16_450-3,ID=B16_499-1,ID=B16_451-5,ID=B16_462-4,ID=EL4_47-2,ID=EL4_47-1,ID=EL4PD1_152-2,ID=EL4_62-1,ID=B16_474-1,ID=B16_484-1,ID=B16_484-2,ID=EL4_72-3,ID=B16_499-2,ID…	NA	NA
Olfr147	chr9	38401698	38407997	+	5	2.41546	0.00268876	0.0184183	2 [1,1]	3 [1,2]	1	ID=B16_464-2,ID=B16_450-3,ID=B16_462-4,ID=EL4_62-1,ID=B16_474-1	NA	NA
Invs	chr4	48279802	48431954	+	25	12.0773	0.00270444	0.0185096	25 [17,8]	0 [0,0]	0.987458	ID=EL4_28_2,ID=EL4_26_4,ID=B16_464-2,ID=B16_485-1,ID=EL4_18_2,ID=B16_502-3,ID=B16_474-3,ID=B16_474-4,ID=B16_474-5,ID=EL4_32_3,ID=EL4_34_5,ID=B16_486-3,ID=EL4PD1_115-3,ID=B16_485-4,ID=B16PD1_532_1,ID=B16_489-1,ID=B16_450-3,ID=B16_449-4,ID=B16_499-1,ID=EL4_24_1,ID=B16_462-4,ID=B16_474-1,ID=B16_491-3,ID=B16_520-2,ID=B16_491-2	NA	NA
Vps41	chr13	18717290	18866811	+	3	1.44928	0.00270624	0.0185096	3 [2,1]	0 [0,0]	1	ID=B16_485-2,ID=B16_474-4,ID=B16_489-1	NA	NA
Lrriq1	chr10	103063198	103236322	-	7	3.38164	0.00271383	0.0185473	7 [4,3]	0 [0,0]	1	ID=B16_460-1,ID=B16_525-2,ID=EL4_67-2,ID=EL4_64-2,ID=B16_451-3,ID=B16_462-4,ID=B16_484-2	NA	NA
Cttnbp2	chr6	18366707	18514749	-	3	1.44928	0.00271689	0.0185539	3 [3,0]	0 [0,0]	1	ID=EL4_52-5,ID=B16_462-4,ID=B16_499-2	NA	NA
St3gal3	chr4	117932158	118134914	-	24	11.5942	0.00272059	0.018565	24 [14,10]	0 [0,0]	0.973237	ID=B16_463-1,ID=B16_455-1,ID=EL4_26_4,ID=B16_101NT-3,ID=B16_464-2,ID=B16_464-1,ID=B16_485-1,ID=B16_502-3,ID=B16_460-1,ID=B16_474-3,ID=B16_474-4,ID=B16_497-1,ID=B16_486-3,ID=EL4PD1_115-3,ID=EL4_36_3,ID=B16_489-1,ID=B16_451-5,ID=B16_475-2,ID=B16_462-4,ID=B16_484-2,ID=B16_515-1,ID=B16_491-3,ID=B16_516-2,ID=B16_520-1	NA	NA
Alcam	chr16	52248996	52454074	-	8	3.86473	0.00273091	0.0186212	8 [2,6]	0 [0,0]	1	ID=B16_463-1,ID=B16_485-1,ID=B16_502-3,ID=B16_460-1,ID=B16_474-4,ID=B16_450-3,ID=EL4_62-1,ID=B16_499-2	NA	NA
Arhgef9	chrX	95048935	95196502	-	4	1.93237	0.00273948	0.0186653	4 [3,1]	0 [0,0]	1	ID=B16_463-1,ID=B16_498-1,ID=B16PD1_533_2,ID=B16_449-4	NA	NA
Eif3a	chr19	60761116	60790693	-	9	4.34783	0.00275632	0.0187657	9 [7,2]	0 [0,0]	0.936736	ID=EL4_60-1,ID=B16_502-1,ID=EL4_46-2,ID=EL4PD1_153-3,ID=EL4_39-4,ID=EL4_67-2,ID=EL4PD1_119-4,ID=B16_462-4,ID=EL4_65-1	NA	NA
Ptk2	chr15	73205105	73423191	-	7	3.38164	0.00276279	0.0187954	7 [2,5]	0 [0,0]	0.857173	ID=B16_463-1,ID=B16_464-1,ID=B16_489-1,ID=B16_499-1,ID=B16_484-4,ID=EL4_54-2,ID=B16_491-2	NA	NA
Strbp	chr2	37483228	37647219	-	5	2.41546	0.00276662	0.0188071	5 [2,3]	0 [0,0]	1	ID=EL4_28_3,ID=EL4_18_2,ID=B16_474-3,ID=EL4_32_2,ID=B16_462-4	NA	NA
Lmbr1	chr5	29229802	29378384	-	3	1.44928	0.00277508	0.0188502	3 [1,2]	0 [0,0]	1	ID=B16_463-1,ID=B16_464-1,ID=B16_450-3	NA	NA
1190002N15Rik	chr9	94517864	94538081	-	7	3.38164	0.00278392	0.0188959	6 [4,2]	1 [0,1]	1	ID=B16_460-1,ID=B16_474-3,ID=B16_474-4,ID=EL4_64-1,ID=B16_499-1,ID=B16_462-4,ID=EL4_62-1	NA	NA
Plch1	chr3	63696731	63899472	-	6	2.89855	0.00279233	0.0189386	6 [4,2]	0 [0,0]	1	ID=B16_464-2,ID=EL4_32_3,ID=B16_499-1,ID=B16_451-3,ID=B16_462-4,ID=B16_474-1	NA	NA
Zdhhc14	chr17	5492600	5753891	+	6	2.89855	0.00285405	0.0193089	6 [4,2]	0 [0,0]	1	ID=B16_463-1,ID=B16_487-4,ID=B16_451-3,ID=B16_462-4,ID=B16_484-1,ID=B16_499-2	NA	NA
Clybl	chr14	122181694	122402232	+	5	2.41546	0.00285464	0.0193089	5 [2,3]	0 [0,0]	1	ID=B16_485-1,ID=B16_460-1,ID=EL4PD1_150-2,ID=EL4_36_3,ID=B16_450-3	NA	NA
Ccdc17	chr4	116596654	116600201	+	3	1.44928	0.00285776	0.0193089	0 [0,0]	3 [3,0]	1	ID=EL4_64-1,ID=B16_462-4,ID=B16_474-1	NA	NA
Lrrc24	chr15	76715276	76722173	-	3	1.44928	0.00285776	0.0193089	0 [0,0]	3 [3,0]	1	ID=B16_488-3,ID=B16_474-3,ID=B16_489-1	NA	NA
Prickle2	chr6	92370908	92706155	-	13	6.28019	0.00288983	0.0195107	13 [6,7]	0 [0,0]	0.999882	ID=B16_463-1,ID=B16_455-2,ID=B16_464-1,ID=B16_450-1,ID=B16_474-3,ID=B16_486-3,ID=B16PD1_531_2,ID=B16_521-2,ID=EL4_36_3,ID=B16_449-4,ID=EL4_70-3,ID=B16_462-4,ID=B16_520-2	NA	NA
Cdan1	chr2	120718186	120850128	-	2	0.966184	0.00289476	0.0195292	1 [1,0]	1 [0,1]	1	ID=B16_497-1,ID=B16_486-3	NA	NA
Ncoa7	chr10	30645584	30803107	-	4	1.93237	0.00294852	0.0198686	4 [1,3]	0 [0,0]	1	ID=EL4PD1_116-2,ID=B16_464-2,ID=B16_474-4,ID=B16_489-1	NA	NA
Tbx18	chr9	87702800	87731260	-	8	3.86473	0.00295891	0.0199168	7 [4,3]	1 [1,0]	0.889051	ID=B16_463-1,ID=B16_498-1,ID=B16_460-1,ID=B16_474-4,ID=B16_450-3,ID=B16_451-5,ID=B16_462-4,ID=B16_474-1	NA	NA
Iqcf3	chr9	106503225	106544689	-	9	4.34783	0.00298651	0.0200874	9 [5,4]	0 [0,0]	1	ID=B16_468-4,ID=B16_463-1,ID=B16_485-3,ID=B16_485-2,ID=B16_474-4,ID=B16_474-5,ID=B16_485-4,ID=B16_474-1,ID=B16_474-2	NA	NA
Mapk10	chr5	102907948	103211334	-	12	5.7971	0.00299788	0.0201268	12 [8,4]	0 [0,0]	1	ID=B16_488-3,ID=B16_464-2,ID=B16_464-1,ID=B16_485-1,ID=B16_485-2,ID=B16_474-3,ID=B16_474-4,ID=EL4PD1_153-3,ID=B16PD1_531_1,ID=B16_489-1,ID=B16_462-4,ID=B16_491-3	NA	NA
Sobp	chr10	43002500	43174530	-	3	1.44928	0.00299914	0.0201268	3 [3,0]	0 [0,0]	1	ID=B16_488-3,ID=B16_497-2,ID=B16_462-4	NA	NA
Alpi	chr1	87098002	87101606	-	3	1.44928	0.00299621	0.0201268	3 [2,1]	0 [0,0]	0.998972	ID=B16_487-4,ID=B16_460-1,ID=B16_499-1	NA	NA
Ctnna1	chr18	35118888	35254773	+	3	1.44928	0.00304891	0.02043	3 [1,2]	0 [0,0]	1	ID=B16_464-1,ID=B16_474-4,ID=B16_499-2	NA	NA
Khnyn	chr14	55884969	55896781	+	4	1.93237	0.00305298	0.0204419	4 [4,0]	0 [0,0]	1	ID=B16_450-1,ID=B16_460-1,ID=B16_485-4,ID=B16_451-5	NA	NA
Fgf12	chr16	28160120	28445227	-	13	6.28019	0.00306818	0.0205283	13 [4,9]	0 [0,0]	1	ID=B16_464-2,ID=B16_502-3,ID=B16_16-2,ID=B16_474-4,ID=B16_497-1,ID=EL4_64-1,ID=EL4_36_3,ID=B16_499-1,ID=B16_451-5,ID=EL4_47-1,ID=EL4_62-1,ID=B16_491-3,ID=B16_474-2	NA	NA
Rbpj	chr5	53466152	53649390	+	4	1.93237	0.003079	0.0205852	4 [2,2]	0 [0,0]	1	ID=B16_463-1,ID=B16_488-3,ID=B16_486-3,ID=EL4PD1_118-1	NA	NA
Smg6	chr11	74925823	75164448	+	8	3.86473	0.0030829	0.0205896	8 [6,2]	0 [0,0]	1	ID=B16_463-1,ID=B16_487-2,ID=B16_474-3,ID=B16PD1_531_1,ID=B16_451-3,ID=B16_461-1,ID=B16_484-1,ID=B16_499-2	predicted cancer driver	NA
Syt9	chr7	107370790	107548656	+	4	1.93237	0.00308853	0.0205896	4 [3,1]	0 [0,0]	1	ID=B16_464-2,ID=B16_474-3,ID=B16_474-4,ID=EL4_55-2	NA	NA
Psmb6-ps2	chr1	101385886	101386590	+	3	1.44928	0.00309121	0.0205896	2 [0,2]	1 [1,0]	1	ID=B16_463-1,ID=B16_464-1,ID=B16_499-1	NA	NA
Afdn	chr17	13760548	13906150	+	3	1.44928	0.00311899	0.0207591	3 [3,0]	0 [0,0]	1	ID=B16_463-1,ID=B16_451-3,ID=LLC_174-3	NA	NA
Hmcn1	chr1	150562524	150993051	-	24	11.5942	0.00312934	0.0208125	24 [14,10]	0 [0,0]	0.998555	ID=B16_463-1,ID=B16_488-3,ID=B16_464-1,ID=B16_487-4,ID=B16_498-1,ID=B16_502-3,ID=B16_502-1,ID=B16_474-3,ID=B16_474-4,ID=B16_474-5,ID=EL4_27_3,ID=EL4PD1_113-1,ID=EL4_64-2,ID=EL4_36_3,ID=EL4PD1_157-2,ID=B16_489-1,ID=B16_450-3,ID=B16_449-4,ID=B16_522-1,ID=B16_499-1,ID=B16_451-5,ID=B16_484-2,ID=B16_515-1,ID=B16_491-3	NA	NA
Rab3c	chr13	110054187	110280206	-	8	3.86473	0.00314453	0.0208667	8 [3,5]	0 [0,0]	1	ID=B16_464-2,ID=B16_464-1,ID=B16_487-4,ID=B16_450-1,ID=B16_498-1,ID=EL4_49-1,ID=B16_474-4,ID=B16_497-1	NA	NA
Pdlim5	chr3	142239590	142395693	-	5	2.41546	0.00314263	0.0208667	5 [2,3]	0 [0,0]	1	ID=B16_464-1,ID=EL4PD1_116-3,ID=B16_474-3,ID=B16_485-4,ID=B16_462-4	NA	NA
Mpped2	chr2	106693269	106868356	+	3	1.44928	0.00314845	0.0208772	3 [1,2]	0 [0,0]	1	ID=B16_474-4,ID=B16_486-3,ID=B16_454-3	NA	NA
Sh3rf1	chr8	61223872	61396071	+	3	1.44928	0.00318067	0.0210752	3 [1,2]	0 [0,0]	1	ID=EL4PD1_157-2,ID=B16_451-5,ID=B16_516-2	NA	NA
Pkp4	chr2	59160850	59355205	+	5	2.41546	0.00323	0.0213703	5 [2,3]	0 [0,0]	1	ID=B16_487-4,ID=B16_485-3,ID=B16_460-1,ID=B16_474-4,ID=B16_499-1	NA	NA
Slc4a4	chr5	88886818	89239653	+	16	7.72947	0.00326225	0.0215516	16 [6,10]	0 [0,0]	0.999571	ID=B16_463-1,ID=B16_488-3,ID=B16_450-1,ID=B16_498-2,ID=B16_502-3,ID=B16_474-3,ID=EL4_67-3,ID=B16_489-1,ID=B16_499-1,ID=B16_451-5,ID=B16_451-3,ID=B16_462-4,ID=B16PD1_160-2,ID=B16_499-2,ID=B16_491-2,ID=LLC_167-1	NA	NA
Sash1	chr10	8722219	8886070	-	2	0.966184	0.00326072	0.0215516	2 [0,2]	0 [0,0]	1	ID=B16_499-1,ID=B16_462-4	NA	NA
Itsn1	chr16	91729353	91920597	+	3	1.44928	0.00328444	0.0216822	3 [1,2]	0 [0,0]	1	ID=B16_485-1,ID=B16_460-1,ID=B16_499-1	NA	NA
Fam83d	chr2	158768093	158786637	+	5	2.41546	0.00329461	0.0217332	3 [0,3]	2 [1,1]	1	ID=B16_487-4,ID=B16_474-5,ID=B16_522-1,ID=B16_491-3,ID=B16_474-2	NA	NA
Tmcc1	chr6	116018611	116193486	-	5	2.41546	0.00329959	0.02175	5 [3,2]	0 [0,0]	1	ID=B16_460-1,ID=B16_489-1,ID=B16_450-3,ID=EL4_70-3,ID=B16_499-2	NA	NA
AI464131	chr4	41495604	41503076	-	3	1.44928	0.00333833	0.0219728	2 [0,2]	1 [1,0]	1	ID=B16_16-1,ID=B16_454-3,ID=B16_484-2	NA	NA
CT025680.3	chr9	38937489	38940102	-	3	1.44928	0.00333833	0.0219728	2 [1,1]	1 [1,0]	1	ID=B16_463-1,ID=B16_488-3,ID=B16_450-1	NA	NA
Mknk1	chr4	115839198	115879250	+	8	3.86473	0.00335866	0.0220903	8 [2,6]	0 [0,0]	0.987134	ID=B16_488-3,ID=B16_460-1,ID=B16_474-3,ID=EL4PD1_150-2,ID=B16_485-4,ID=EL4_64-1,ID=B16_484-4,ID=B16_499-2	NA	NA
Vstm2a	chr11	16257803	16427310	+	5	2.41546	0.00336296	0.0221023	4 [3,1]	1 [0,1]	1	ID=B16_486-3,ID=B16_525-2,ID=B16_517-1,ID=B16_499-1,ID=B16_462-4	NA	NA
Angpt1	chr15	42424727	42676977	-	12	5.7971	0.00337732	0.0221803	11 [4,7]	1 [0,1]	1	ID=B16_463-1,ID=LLC_173-3,ID=B16_502-3,ID=B16_474-3,ID=B16_474-4,ID=EL4_64-5,ID=EL4_36_3,ID=EL4_70-2,ID=B16_13-1,ID=B16_462-4,ID=B16_484-4,ID=B16_499-2	NA	NA
Thyn1	chr9	26999710	27007330	+	4	1.93237	0.00339182	0.0222592	0 [0,0]	4 [4,0]	0.792332	ID=EL4PD1_117-3,ID=EL4PD1_117-1,ID=EL4PD1_118-1,ID=EL4PD1_118-3	NA	NA
Rbm47	chr5	66016549	66173118	-	2	0.966184	0.00339801	0.0222833	2 [1,1]	0 [0,0]	1	ID=B16_464-1,ID=B16_497-2	NA	NA
Dnah11	chr12	117877982	118199043	-	14	6.76329	0.00341995	0.0224108	14 [8,6]	0 [0,0]	0.973313	ID=B16_464-2,ID=B16_485-1,ID=B16_450-1,ID=B16_460-1,ID=B16_474-3,ID=B16_474-4,ID=B16_497-1,ID=B16_485-4,ID=EL4_64-1,ID=B16_489-1,ID=B16_499-1,ID=B16_462-4,ID=EL4_62-1,ID=B16_491-2	NA	NA
Akap13	chr7	75455534	75754609	+	13	6.28019	0.00344501	0.0225584	13 [8,5]	0 [0,0]	0.947551	ID=B16_463-1,ID=B16_464-2,ID=B16_498-1,ID=B16_460-1,ID=B16_474-3,ID=B16_474-4,ID=B16_485-4,ID=EL4PD1_157-1,ID=EL4_38_3,ID=B16_450-3,ID=B16_499-1,ID=EL4_62-1,ID=EL4_54-2	NA	NA
Gnb1	chr4	155491361	155559269	+	13	6.28019	0.00346988	0.0226878	13 [5,8]	0 [0,0]	0.99986	ID=B16_488-3,ID=B16_464-1,ID=B16_485-1,ID=B16_487-4,ID=B16_498-1,ID=B16_502-3,ID=B16_474-4,ID=B16_489-1,ID=B16_451-5,ID=B16_451-3,ID=B16_462-4,ID=B16_484-1,ID=B16_491-3	NA	NA
Oog2	chr4	144190729	144196934	+	4	1.93237	0.00349876	0.0228432	2 [1,1]	2 [1,1]	1	ID=B16_464-2,ID=B16_474-3,ID=B16_474-4,ID=B16_475-1	NA	NA
Itga1	chr13	114958079	115101964	-	3	1.44928	0.00352133	0.0229737	3 [1,2]	0 [0,0]	1	ID=B16_485-2,ID=B16_489-1,ID=B16_451-3	NA	NA
Arhgap24	chr5	102481391	102897937	+	20	9.66184	0.00353369	0.0230375	20 [9,11]	0 [0,0]	0.999897	ID=B16_463-1,ID=B16_464-2,ID=B16_464-1,ID=B16_502-3,ID=B16_460-1,ID=B16_485-2,ID=B16_474-3,ID=EL4_27_3,ID=EL4PD1_114-1,ID=EL4_36_3,ID=EL4_38_3,ID=B16_489-1,ID=B16_450-3,ID=B16_499-1,ID=EL4_24_1,ID=B16_451-3,ID=B16_518-1,ID=EL4_65-1,ID=B16_484-2,ID=B16_491-3	NA	NA
Skint9	chr4	112385969	112433985	-	12	5.7971	0.00354161	0.0230723	11 [5,6]	1 [0,1]	1	ID=B16_464-2,ID=B16_464-1,ID=EL4PD1_114-3,ID=B16_498-1,ID=B16_502-3,ID=EL4_32_1,ID=B16_474-4,ID=B16_489-1,ID=B16_499-1,ID=B16_451-5,ID=B16_451-3,ID=B16_462-4	NA	NA
Frmd4a	chr2	4017744	4614041	+	28	13.5266	0.00356196	0.0231879	28 [18,10]	0 [0,0]	1	ID=B16_463-1,ID=EL4_28_4,ID=B16_488-3,ID=B16_464-2,ID=B16_464-1,ID=B16_485-1,ID=B16_487-4,ID=B16_487-2,ID=LLC_172-2,ID=B16_502-3,ID=B16_460-1,ID=EL4_32_1,ID=EL4_22_3,ID=EL4PD1_104-1,ID=B16_474-3,ID=B16_474-4,ID=B16_497-1,ID=EL4_32_3,ID=B16_486-3,ID=B16PD1_531_2,ID=B16PD1_532_2,ID=EL4_38_3,ID=B16_499-1,ID=B16_451-3,ID=B16_484-2,ID=EL4_29_2,ID=B16_520-1,ID=B16_474-2	NA	NA
Dcaf10	chr4	45342101	45379759	+	10	4.83092	0.00357067	0.0232107	10 [2,8]	0 [0,0]	1	ID=B16_3-4,ID=B16_464-2,ID=B16_502-3,ID=B16_474-3,ID=B16_474-4,ID=B16_497-1,ID=B16_485-4,ID=B16_489-1,ID=B16_13-1,ID=B16_462-4	NA	NA
Filip1l	chr16	57353093	57573126	+	7	3.38164	0.00356883	0.0232107	7 [4,3]	0 [0,0]	1	ID=B16_498-2,ID=B16_502-3,ID=B16_460-1,ID=B16_450-3,ID=B16_499-1,ID=B16_462-4,ID=B16_499-2	NA	NA
Ddi2	chr4	141677549	141723419	-	9	4.34783	0.00357893	0.0232474	9 [4,5]	0 [0,0]	1	ID=B16_464-2,ID=B16_464-1,ID=B16_474-3,ID=B16_474-4,ID=EL4_64-5,ID=B16_499-1,ID=B16_451-3,ID=EL4_61-2,ID=B16_491-3	NA	NA
Krtap21-1	chr16	89403027	89403774	-	3	1.44928	0.00359956	0.0233304	0 [0,0]	3 [0,3]	1	ID=B16_474-3,ID=B16_489-1,ID=B16_462-4	NA	NA
Cyp2j14-ps	chr4	96356311	96380211	-	7	3.38164	0.00361166	0.0233918	5 [3,2]	2 [1,1]	1	ID=B16_488-3,ID=B16_464-1,ID=B16_502-3,ID=B16_474-3,ID=B16_474-4,ID=EL4_32_3,ID=B16_489-1	NA	NA
Tal2	chr4	53779705	53788712	+	4	1.93237	0.00364523	0.023592	4 [1,3]	0 [0,0]	1	ID=B16_101NT-3,ID=B16_474-4,ID=B16_485-4,ID=B16_462-4	NA	NA
Dclk1	chr3	55242364	55539068	+	11	5.31401	0.00365306	0.0236115	10 [4,6]	1 [0,1]	1	ID=EL4PD1_116-2,ID=B16_463-1,ID=B16_488-3,ID=B16_464-1,ID=B16_498-1,ID=B16_474-4,ID=EL4PD1_153-3,ID=EL4PD1_157-2,ID=B16_489-1,ID=B16_450-3,ID=B16_462-4	NA	NA
Mup-ps13	chr4	61534230	61536973	+	3	1.44928	0.00365353	0.0236115	0 [0,0]	3 [1,2]	1	ID=LLC_173-3,ID=B16_474-4,ID=B16_485-4	NA	NA
Card19	chr13	49202951	49216026	-	4	1.93237	0.00368255	0.0237818	3 [0,3]	1 [0,1]	1	ID=B16_488-3,ID=B16_498-2,ID=B16_498-1,ID=B16_491-3	NA	NA
Pou3f2	chr4	22482780	22488366	-	3	1.44928	0.0037081	0.0239295	1 [1,0]	2 [1,1]	1	ID=B16_502-3,ID=B16_489-1,ID=B16_462-4	NA	NA
Socs6	chr18	88668695	88894339	-	9	4.34783	0.00373227	0.024068	9 [5,4]	0 [0,0]	1	ID=EL4_26_4,ID=EL4_22_3,ID=B16_474-4,ID=B16_497-1,ID=EL4_32_3,ID=EL4PD1_150-2,ID=B16_450-3,ID=B16_462-4,ID=EL4_62-1	NA	NA
Pdss2	chr10	43221600	43464882	+	8	3.86473	0.00374182	0.0241122	8 [4,4]	0 [0,0]	1	ID=B16_463-1,ID=B16_464-1,ID=B16_485-1,ID=B16_474-3,ID=B16_474-4,ID=B16_486-3,ID=B16_462-4,ID=B16_484-2	NA	NA
Aoah	chr13	20794113	21024252	+	8	3.86473	0.0037637	0.0241657	8 [5,3]	0 [0,0]	1	ID=B16_463-1,ID=B16_464-1,ID=B16_460-1,ID=B16_485-2,ID=B16_474-4,ID=EL4PD1_113-1,ID=B16_450-3,ID=B16_491-2	NA	NA
Cdc42bpa	chr1	179960585	180165603	+	8	3.86473	0.00375548	0.0241657	8 [2,6]	0 [0,0]	1	ID=B16_463-1,ID=B16_464-2,ID=B16_464-1,ID=B16_460-1,ID=B16_489-1,ID=B16_499-1,ID=EL4_65-1,ID=B16_499-2	NA	NA
D730048I06Rik	chr9	35788050	35790112	-	3	1.44928	0.00376325	0.0241657	0 [0,0]	3 [3,0]	1	ID=B16_460-1,ID=B16_451-5,ID=EL4_62-1	NA	NA
A1bg	chr15	60917589	60921270	-	3	1.44928	0.00376325	0.0241657	0 [0,0]	3 [0,3]	0.667455	ID=B16_464-1,ID=B16_502-3,ID=B16_499-1	NA	NA
Stk3	chr15	34875496	35155806	-	13	6.28019	0.00376854	0.0241674	13 [10,3]	0 [0,0]	1	ID=EL4_60-2,ID=EL4_26_4,ID=B16_487-2,ID=EL4_68-1,ID=EL4_70-1,ID=B16PD1_537_1,ID=B16_474-3,ID=B16_497-1,ID=EL4_67-3,ID=EL4_67-2,ID=EL4_70-2,ID=B16_13-3,ID=LLC_167-1	NA	NA
Glra2	chrX	165129017	165327393	-	9	4.34783	0.00377006	0.0241674	9 [5,4]	0 [0,0]	0.998893	ID=B16_488-3,ID=B16_464-2,ID=B16_464-1,ID=B16_497-1,ID=EL4_67-3,ID=B16_489-1,ID=B16_451-3,ID=B16_474-1,ID=B16_484-1	NA	NA
Ubr3	chr2	69897246	70024013	+	3	1.44928	0.00377208	0.0241674	3 [1,2]	0 [0,0]	1	ID=B16_463-1,ID=B16_462-4,ID=B16_491-3	NA	NA
Mmp16	chr4	17853458	18119145	+	44	21.256	0.00381768	0.0244153	44 [29,15]	0 [0,0]	0.995246	ID=B16_463-1,ID=B16_455-1,ID=B16_488-3,ID=EL4_63-1,ID=B16_464-2,ID=B16_464-1,ID=B16_485-1,ID=B16_487-4,ID=B16_485-3,ID=B16_487-2,ID=EL4PD1_114-3,ID=B16_450-1,ID=B16_4-2,ID=B16_502-3,ID=B16_460-1,ID=B16PD1_537_1,ID=B16_485-2,ID=B16_16-1,ID=B16_474-3,ID=B16_474-4,ID=B16_474-5,ID=B16_497-1,ID=EL4_59-1,ID=B16_485-4,ID=B16_454-3,ID=B16_489-1,ID=B16_450-3,ID=B16_449-4,ID=B16_13-3,ID=B16_499-1,ID=B16_45…	NA	NA
Ddost	chr4	138304730	138312628	+	3	1.44928	0.003819	0.0244153	0 [0,0]	3 [2,1]	1	ID=B16_463-1,ID=B16_502-3,ID=B16_474-4	NA	NA
Sbf2	chr7	110308013	110614922	-	16	7.72947	0.00385204	0.0246089	16 [7,9]	0 [0,0]	0.999827	ID=B16_463-1,ID=EL4_28_2,ID=EL4_28_3,ID=B16_488-3,ID=B16_464-1,ID=EL4PD1_116-3,ID=B16_474-4,ID=B16_497-1,ID=EL4_55-2,ID=B16_489-1,ID=EL4PD1_104-3,ID=B16_484-1,ID=B16_499-2,ID=EL4_29_2,ID=B16_515-1,ID=B16_491-3	NA	NA
Ldb2	chr5	44472132	44799680	-	14	6.76329	0.00385731	0.0246213	14 [10,4]	0 [0,0]	0.991528	ID=B16_464-2,ID=B16_464-1,ID=B16_487-4,ID=B16_498-2,ID=B16_502-3,ID=B16_474-4,ID=B16_497-2,ID=B16_449-4,ID=B16_462-4,ID=LLC_174-1,ID=B16_484-1,ID=B16_491-3,ID=EL4PD1_152-1,ID=B16_474-2	NA	NA
Snapc3	chr4	83417749	83467676	+	11	5.31401	0.00385951	0.0246213	11 [5,6]	0 [0,0]	0.903927	ID=B16_488-3,ID=B16_464-2,ID=B16_502-3,ID=B16_460-1,ID=B16_474-4,ID=B16_474-5,ID=B16_485-4,ID=B16_462-4,ID=EL4_47-1,ID=B16_484-1,ID=EL4_72-3	NA	NA
Srgap1	chr10	121780991	122047315	-	8	3.86473	0.00386928	0.024666	8 [3,5]	0 [0,0]	1	ID=B16_488-3,ID=B16_464-1,ID=B16_474-4,ID=B16_497-1,ID=B16_450-3,ID=B16_451-3,ID=B16_484-4,ID=B16_484-1	NA	NA
Rbp2	chr9	98486115	98509781	+	6	2.89855	0.00389829	0.02478	5 [1,4]	1 [1,0]	1	ID=B16_464-2,ID=B16_485-2,ID=B16_474-3,ID=B16_474-4,ID=B16_462-4,ID=B16_491-3	NA	NA
Gria2	chr3	80681450	80802835	-	3	1.44928	0.00389789	0.02478	3 [2,1]	0 [0,0]	1	ID=B16_463-1,ID=EL4_64-1,ID=B16_491-2	NA	NA
Ankrd31	chr13	96748272	96910039	+	5	2.41546	0.0039354	0.0249981	5 [3,2]	0 [0,0]	1	ID=B16_463-1,ID=B16_460-1,ID=B16_474-3,ID=B16_484-1,ID=EL4_72-3	NA	NA
Gdf6	chr4	9844372	9862345	+	5	2.41546	0.00393925	0.0250047	4 [1,3]	1 [1,0]	1	ID=EL4PD1_116-2,ID=EL4_28_2,ID=B16_464-2,ID=B16_485-1,ID=B16_474-3	NA	NA
Olfr972	chr9	39866422	39874651	+	5	2.41546	0.00396929	0.0251775	1 [0,1]	4 [3,1]	0.841636	ID=B16_463-1,ID=B16_450-3,ID=B16_462-4,ID=LLC_174-1,ID=B16_474-1	NA	NA
Sla2	chr2	156872457	156887078	-	4	1.93237	0.00399145	0.025282	1 [0,1]	3 [3,0]	1	ID=EL4PD1_149-2,ID=B16_474-4,ID=B16_497-2,ID=B16_484-1	NA	NA
Klf8	chrX	153237748	153396132	+	5	2.41546	0.00405343	0.0256564	5 [1,4]	0 [0,0]	1	ID=B16_464-1,ID=B16_460-1,ID=B16_451-5,ID=B16_453-2,ID=B16_518-1	NA	NA
Mbp	chr18	82475162	82585637	+	14	6.76329	0.00405678	0.0256594	14 [7,7]	0 [0,0]	1	ID=B16_464-2,ID=B16_464-1,ID=EL4_60-1,ID=EL4PD1_149-2,ID=B16_460-1,ID=B16_486-3,ID=EL4PD1_115-2,ID=EL4_52-5,ID=EL4_67-3,ID=EL4_67-2,ID=B16_450-3,ID=B16PD1_160-2,ID=B16_524-2,ID=EL4_54-2	NA	NA
Olfr894	chr9	38218055	38221706	+	4	1.93237	0.00407159	0.0257348	1 [1,0]	3 [3,0]	1	ID=B16_460-1,ID=B16_474-3,ID=B16_474-4,ID=B16_462-4	NA	NA
Zfp536	chr7	37479177	37772875	-	8	3.86473	0.00408317	0.0257897	8 [3,5]	0 [0,0]	0.999515	ID=B16_463-1,ID=B16_464-1,ID=B16_487-4,ID=B16_474-3,ID=B16_485-4,ID=B16_489-1,ID=B16_449-4,ID=B16_499-1	NA	NA
Vmn1r232	chr17	20913205	20914363	-	3	1.44928	0.00410673	0.0259201	0 [0,0]	3 [0,3]	1	ID=B16_450-3,ID=B16_462-4,ID=B16_491-3	NA	NA
Hacd1	chr2	13850282	14056036	-	7	3.38164	0.00411174	0.0259334	7 [4,3]	0 [0,0]	1	ID=EL4_63-1,ID=B16_464-1,ID=LLC_168-1,ID=B16PD1_537_2,ID=EL4_62-1,ID=B16_484-2,ID=B16_491-3	NA	NA
Pkhd1l1	chr15	44457553	44601369	+	5	2.41546	0.00413403	0.0260555	5 [5,0]	0 [0,0]	1	ID=EL4PD1_116-2,ID=B16_464-2,ID=B16_489-1,ID=B16_462-4,ID=B16_499-2	NA	NA
Car10	chr11	93098404	93601745	+	28	13.5266	0.00414514	0.0261071	28 [13,15]	0 [0,0]	0.999799	ID=B16_463-1,ID=B16_464-2,ID=EL4_60-1,ID=B16_485-1,ID=B16_485-3,ID=B16_487-2,ID=B16_502-3,ID=B16_460-1,ID=B16PD1_533_3,ID=B16_16-1,ID=B16_474-3,ID=B16_474-4,ID=EL4_19_2,ID=EL4_48-4,ID=EL4_67-3,ID=EL4_25_3,ID=EL4PD1_157-2,ID=B16_475-2,ID=B16_462-4,ID=B16_484-2,ID=EL4_54-2,ID=B16_499-2,ID=EL4_29_2,ID=EL4_61-2,ID=B16_491-3,ID=B16_516-2,ID=B16_520-2,ID=EL4PD1_118-3	NA	NA
1700057G04Rik	chr9	92309377	92357876	+	12	5.7971	0.00414958	0.0261166	11 [3,8]	1 [0,1]	1	ID=EL4PD1_116-2,ID=B16_488-3,ID=EL4_60-1,ID=B16_487-4,ID=B16_502-3,ID=B16_460-1,ID=B16_497-1,ID=EL4_27_3,ID=B16_489-1,ID=B16_499-1,ID=B16_499-2,ID=B16_491-3	NA	NA
Cwc27	chr13	104631140	104816953	-	7	3.38164	0.0041635	0.0261857	7 [4,3]	0 [0,0]	1	ID=EL4PD1_116-2,ID=B16_463-1,ID=B16_474-3,ID=B16_497-1,ID=B16PD1_531_1,ID=B16_450-3,ID=B16_462-4	NA	NA
Pik3cb	chr9	99036654	99140087	-	17	8.21256	0.00419643	0.026337	17 [8,9]	0 [0,0]	0.960014	ID=B16_463-1,ID=EL4_60-2,ID=EL4_63-1,ID=B16_464-1,ID=B16_498-2,ID=B16_460-1,ID=EL4_45-1,ID=B16_474-3,ID=B16_474-4,ID=EL4_67-3,ID=B16_489-1,ID=EL4_70-3,ID=EL4_62-1,ID=LLC_170-1,ID=EL4_72-3,ID=EL4_61-2,ID=B16_491-2	NA	NA
Dock2	chr11	34226815	34783892	-	17	8.21256	0.00420583	0.0263702	17 [6,11]	0 [0,0]	1	ID=B16_463-1,ID=B16_488-3,ID=B16_464-2,ID=B16_464-1,ID=B16_485-1,ID=B16_487-4,ID=B16_498-1,ID=B16_502-3,ID=B16_460-1,ID=B16_474-4,ID=EL4_32_2,ID=B16_489-1,ID=B16_450-3,ID=B16_499-1,ID=B16_462-4,ID=B16_484-1,ID=B16_516-2	NA	NA
Mup6	chr4	59964294	60007120	+	10	4.83092	0.00420764	0.0263702	9 [4,5]	1 [0,1]	1	ID=EL4PD1_116-2,ID=B16_463-1,ID=B16_488-3,ID=B16_464-2,ID=EL4PD1_116-3,ID=B16_474-4,ID=EL4_36_2,ID=B16_451-3,ID=EL4_54-2,ID=B16_491-3	NA	NA
Stac	chr9	111561437	111690348	-	19	9.17874	0.00422293	0.0264086	18 [8,10]	1 [1,0]	1	ID=B16_463-1,ID=B16_488-3,ID=B16_464-2,ID=B16_464-1,ID=EL4PD1_116-3,ID=B16_498-1,ID=B16_502-1,ID=B16_452-1,ID=B16_460-1,ID=B16_474-4,ID=EL4_36_2,ID=B16_450-3,ID=B16_451-3,ID=B16_462-4,ID=EL4_62-1,ID=B16_474-1,ID=B16_484-2,ID=B16_491-3,ID=B16_491-2	NA	NA
Zdhhc21	chr4	82798738	82859673	-	14	6.76329	0.00422562	0.0264086	14 [9,5]	0 [0,0]	0.99953	ID=B16_464-2,ID=B16_502-3,ID=B16_460-1,ID=B16_474-4,ID=B16_474-5,ID=B16_497-1,ID=EL4_64-1,ID=B16_489-1,ID=B16_451-3,ID=B16_462-4,ID=B16_484-1,ID=B16_499-2,ID=B16_491-3,ID=B16_491-2	NA	NA
Cyp4a30b	chr4	115452604	115471062	+	6	2.89855	0.00422036	0.0264086	6 [4,2]	0 [0,0]	1	ID=B16_488-3,ID=B16_464-2,ID=B16_497-1,ID=B16_489-1,ID=B16_449-4,ID=B16_462-4	NA	NA
Vwc2	chr11	11114744	11268931	+	4	1.93237	0.004223	0.0264086	3 [1,2]	1 [1,0]	1	ID=B16_464-1,ID=B16_474-3,ID=B16_474-4,ID=B16_499-2	NA	NA
Skint11	chr4	114163384	114245028	+	17	8.21256	0.00425045	0.0265356	16 [9,7]	1 [1,0]	1	ID=B16_464-2,ID=B16_485-1,ID=B16_485-3,ID=B16_450-1,ID=B16_498-1,ID=B16_460-1,ID=B16_485-2,ID=B16_474-3,ID=B16_474-4,ID=B16_497-1,ID=B16_486-3,ID=EL4_38_3,ID=B16_475-2,ID=B16_462-4,ID=EL4_62-1,ID=EL4_72-3,ID=B16_499-2	NA	NA
Cacna1b	chr2	24603887	24763152	-	2	0.966184	0.00425188	0.0265356	1 [0,1]	1 [0,1]	1	ID=B16_474-4,ID=B16_461-1	NA	NA
Olfr930	chr9	38929809	38931396	+	3	1.44928	0.00428671	0.0267342	0 [0,0]	3 [1,2]	1	ID=B16_488-3,ID=B16_460-1,ID=B16_489-1	NA	NA
Aaed1	chr13	64275572	64312593	-	8	3.86473	0.0043047	0.0268276	8 [6,2]	0 [0,0]	1	ID=B16_488-3,ID=EL4_26_4,ID=EL4_22_3,ID=EL4_37_2,ID=B16PD1_537_4,ID=B16_474-4,ID=B16_489-1,ID=EL4_48-1	NA	NA
Cds2	chr2	132263148	132312050	+	9	4.34783	0.00434502	0.02706	9 [1,8]	0 [0,0]	0.999577	ID=B16_455-1,ID=B16_456-4,ID=B16_502-1,ID=B16_521-2,ID=B16_521-1,ID=B16_449-3,ID=B16_518-1,ID=B16_524-2,ID=B16_516-2	NA	NA
Epha3	chr16	63543538	63864158	-	20	9.66184	0.00434988	0.0270713	19 [13,6]	1 [0,1]	0.912714	ID=B16_464-2,ID=B16_464-1,ID=B16_485-1,ID=B16_487-4,ID=B16_502-3,ID=B16_460-1,ID=B16_12-3,ID=B16_474-4,ID=B16_16-4,ID=B16_497-1,ID=EL4PD1_119-4,ID=B16_2-2,ID=B16_1-1,ID=B16_13-1,ID=B16_5-2,ID=B16_462-4,ID=EL4_65-1,ID=B16_17-3,ID=B16_474-1,ID=LLC_170-1	NA	NA
Wdr17	chr8	54693231	54887150	-	8	3.86473	0.00436821	0.0271664	8 [5,3]	0 [0,0]	1	ID=B16_463-1,ID=B16_485-1,ID=B16_474-3,ID=B16_474-4,ID=EL4PD1_115-2,ID=B16_489-1,ID=B16_450-3,ID=B16_451-5	NA	NA
Tbc1d2b	chr9	90202027	90270769	-	11	5.31401	0.004388	0.0272705	11 [1,10]	0 [0,0]	0.982773	ID=B16_463-1,ID=B16_464-2,ID=B16_487-2,ID=B16_450-1,ID=LLC_172-2,ID=B16_460-1,ID=B16_474-4,ID=B16PD1_531_1,ID=B16_451-5,ID=B16_451-3,ID=EL4_72-3	NA	NA
Tbc1d32	chr10	56014293	56228689	-	9	4.34783	0.00439255	0.0272797	9 [3,6]	0 [0,0]	0.99814	ID=B16_463-1,ID=B16_488-3,ID=B16_464-2,ID=B16_487-2,ID=B16_502-3,ID=B16_502-1,ID=B16_489-1,ID=B16_449-4,ID=B16_462-4	NA	NA
Morc1	chr16	48431237	48630905	+	6	2.89855	0.00440095	0.0273128	6 [4,2]	0 [0,0]	0.861255	ID=B16_488-3,ID=B16_474-4,ID=B16_451-5,ID=B16_462-4,ID=B16PD1_163-3,ID=EL4_65-1	NA	NA
AC073945.3	chr9	39383330	39384320	+	3	1.44928	0.00440981	0.0273298	0 [0,0]	3 [1,2]	1	ID=B16_450-3,ID=EL4_62-1,ID=EL4_61-2	NA	NA
Slc24a2	chr4	86983124	87230477	-	32	15.4589	0.00442921	0.0274309	31 [17,14]	1 [0,1]	0.996125	ID=B16_463-1,ID=B16_455-2,ID=EL4_28_1,ID=B16_488-3,ID=EL4_63-1,ID=B16_464-2,ID=B16_485-1,ID=B16_487-4,ID=B16_485-3,ID=B16_487-2,ID=B16_498-1,ID=B16_502-3,ID=B16_460-1,ID=B16_474-3,ID=B16_474-4,ID=B16_497-1,ID=EL4PD1_113-1,ID=EL4PD1_153-3,ID=B16_485-4,ID=EL4_64-1,ID=EL4PD1_157-1,ID=B16_489-1,ID=B16_450-3,ID=B16_451-3,ID=B16_462-4,ID=EL4PD1_104-3,ID=EL4_62-1,ID=B16_484-4,ID=B16_484-1,ID=B16_484-2,I…	NA	NA
Zfp462	chr4	54947976	55083563	+	19	9.17874	0.00446561	0.0276372	19 [4,15]	0 [0,0]	1	ID=B16_488-3,ID=EL4_26_4,ID=B16_464-2,ID=B16_485-3,ID=B16_450-1,ID=B16_498-1,ID=B16_502-3,ID=B16_474-3,ID=B16_474-4,ID=B16_16-4,ID=B16_486-3,ID=B16_485-4,ID=B16_489-1,ID=B16_449-4,ID=B16_451-3,ID=B16_462-4,ID=B16_499-2,ID=B16_491-3,ID=B16_491-2	NA	NA
Mcm2	chr6	88883474	88898780	-	4	1.93237	0.00449032	0.0277708	2 [1,1]	2 [2,0]	1	ID=B16_455-1,ID=B16_456-4,ID=B16_460-1,ID=B16_491-3	NA	NA
Ccdc141	chr2	77009902	77170635	-	4	1.93237	0.00449742	0.0277954	4 [0,4]	0 [0,0]	1	ID=B16_488-3,ID=B16_474-4,ID=EL4_55-2,ID=B16_484-2	NA	NA
Dmrta1	chr4	89679436	89691919	+	5	2.41546	0.00454034	0.0280412	3 [0,3]	2 [2,0]	1	ID=EL4PD1_116-2,ID=B16_474-3,ID=B16_474-4,ID=B16_450-3,ID=B16_474-1	NA	NA
Ptpro	chr6	137252334	137463227	+	6	2.89855	0.00456106	0.0281497	6 [5,1]	0 [0,0]	1	ID=B16_464-1,ID=B16_485-1,ID=B16_502-3,ID=B16_486-3,ID=B16_499-1,ID=B16_499-2	NA	NA
Hagh	chr17	24840143	24863724	+	6	2.89855	0.00458963	0.0283065	4 [1,3]	2 [2,0]	0.997015	ID=B16_488-3,ID=B16_487-2,ID=EL4PD1_104-3,ID=EL4PD1_152-2,ID=EL4PD1_105-2,ID=B16_491-3	NA	NA
Rorb	chr19	18930605	19111196	-	6	2.89855	0.00462255	0.0284504	6 [1,5]	0 [0,0]	1	ID=B16_450-1,ID=B16_498-1,ID=B16_485-4,ID=B16_489-1,ID=B16_462-3,ID=B16_491-3	NA	NA
Maob	chrX	16709282	16817366	-	2	0.966184	0.00462014	0.0284504	1 [1,0]	1 [1,0]	1	ID=EL4_28_1,ID=B16_498-1	NA	NA
Smyd3	chr1	178951960	179518034	-	27	13.0435	0.00463091	0.0284822	27 [13,14]	0 [0,0]	1	ID=B16_463-1,ID=B16_101NT-3,ID=B16_464-2,ID=B16_464-1,ID=B16_487-2,ID=B16_450-1,ID=B16_498-1,ID=EL4_18_2,ID=B16_460-1,ID=B16_485-2,ID=B16PD1_161-4,ID=B16_474-3,ID=B16_486-3,ID=EL4PD1_153-3,ID=B16_485-4,ID=EL4_64-5,ID=B16_489-1,ID=B16_499-1,ID=B16_451-3,ID=B16_462-4,ID=B16PD1_163-1,ID=B16PD1_160-3,ID=EL4_72-3,ID=EL4_54-3,ID=B16_499-2,ID=B16_491-3,ID=B16_520-1	NA	NA
Fgd4	chr16	16422563	16599978	-	6	2.89855	0.00465359	0.0286019	6 [3,3]	0 [0,0]	1	ID=B16_464-1,ID=B16_474-4,ID=EL4PD1_113-1,ID=B16_450-3,ID=B16_462-4,ID=B16_474-1	NA	NA
Ppm1e	chr11	87226906	87359023	-	2	0.966184	0.00471983	0.0289891	2 [0,2]	0 [0,0]	1	ID=B16_463-1,ID=B16_450-3	NA	NA
Pcdha4	chr18	36952648	37187657	+	9	4.34783	0.00473809	0.0290812	9 [2,7]	0 [0,0]	1	ID=B16_463-1,ID=B16_464-2,ID=B16_464-1,ID=B16_450-1,ID=B16_489-1,ID=B16_451-5,ID=B16_462-4,ID=B16PD1_163-3,ID=B16_484-1	NA	NA
Cdk5r2	chr1	74854934	74857732	+	2	0.966184	0.00474429	0.0290992	0 [0,0]	2 [2,0]	1	ID=EL4_45-1,ID=B16_449-4	NA	NA
Huwe1	chrX	151803327	151935417	+	4	1.93237	0.00475274	0.0291309	4 [3,1]	0 [0,0]	1	ID=B16_488-3,ID=B16_464-2,ID=B16_464-1,ID=B16_474-3	NA	NA
Ror1	chr4	100095791	100444765	+	41	19.8068	0.00478468	0.0292663	41 [21,20]	0 [0,0]	1	ID=EL4_41-1,ID=B16PD1_534_2,ID=B16_488-3,ID=B16_464-2,ID=B16_464-1,ID=B16_485-1,ID=B16_485-3,ID=B16_450-1,ID=B16_502-3,ID=B16_502-1,ID=B16_460-1,ID=B16PD1_537_1,ID=B16_485-2,ID=B16_474-3,ID=B16_474-4,ID=B16_474-5,ID=EL4_34_5,ID=EL4_59-1,ID=B16_486-3,ID=EL4PD1_150-2,ID=B16_485-4,ID=B16_489-1,ID=B16_450-3,ID=B16_499-1,ID=EL4_24_1,ID=B16_451-5,ID=EL4PD1_118-2,ID=B16_451-3,ID=B16_475-1,ID=B16_462-4,I…	NA	NA
Ssh2	chr11	77216287	77460220	+	11	5.31401	0.00478007	0.0292663	9 [4,5]	2 [0,2]	1	ID=B16_488-3,ID=B16_464-2,ID=B16_464-1,ID=B16_487-4,ID=B16_450-1,ID=B16_502-3,ID=B16_474-4,ID=B16_474-5,ID=EL4_32_3,ID=B16_489-1,ID=EL4_47-2	predicted cancer driver	NA
Dusp11	chr6	85942268	85961667	-	6	2.89855	0.00478329	0.0292663	6 [4,2]	0 [0,0]	1	ID=B16_464-2,ID=EL4PD1_156-2,ID=EL4_37_2,ID=B16PD1_160-2,ID=EL4PD1_152-2,ID=EL4PD1_152-3	NA	NA
Ppp1r1c	chr2	79708062	79818496	+	2	0.966184	0.00480644	0.0293592	2 [1,1]	0 [0,0]	1	ID=B16_474-4,ID=B16_486-3	NA	NA
Tiam2	chr17	3326573	3519397	+	25	12.0773	0.00483635	0.0295216	25 [18,7]	0 [-1,1]	0.956044	ID=EL4_28_1,ID=EL4_28_3,ID=B16_464-2,ID=B16_464-1,ID=B16_487-2,ID=EL4_18_2,ID=B16_502-3,ID=B16_460-1,ID=EL4_32_1,ID=EL4_22_3,ID=B16PD1_537_2,ID=EL4_19_2,ID=EL4_27_3,ID=EL4_32_3,ID=EL4_32_2,ID=B16_485-4,ID=EL4_25_3,ID=B16_449-4,ID=EL4_24_1,ID=B16_451-3,ID=B16_462-4,ID=EL4_62-1,ID=B16_474-1,ID=B16_499-2,ID=EL4_29_2	NA	NA
D430042O09Rik	chr7	125707915	125874793	+	2	0.966184	0.00485609	0.0296218	2 [1,1]	0 [0,0]	1	ID=B16_502-3,ID=EL4_49-1	NA	NA
Ttbk2	chr2	120732816	120850604	-	2	0.966184	0.00488303	0.0297454	1 [1,0]	1 [0,1]	1	ID=B16_497-1,ID=B16_486-3	NA	NA
2010109A12Rik	chr5	93206518	93213475	+	4	1.93237	0.00489363	0.0297897	1 [1,0]	3 [3,0]	1	ID=B16_487-4,ID=B16_485-2,ID=EL4_55-2,ID=EL4_54-2	NA	NA
Fancc	chr13	63347512	63497278	-	3	1.44928	0.00489825	0.0297974	3 [0,3]	0 [1,-1]	1	ID=B16_498-1,ID=B16_474-4,ID=EL4_32_2	NA	NA
4930452B06Rik	chr14	8431192	8666240	-	9	4.34783	0.00490303	0.0298061	8 [2,6]	1 [0,1]	1	ID=B16_464-2,ID=B16_485-2,ID=B16_474-3,ID=B16_474-4,ID=EL4_67-2,ID=EL4_64-5,ID=EL4_64-1,ID=B16_462-4,ID=B16_499-2	NA	NA
Prlr	chr15	10177646	10348556	+	5	2.41546	0.00491118	0.0298354	5 [2,3]	0 [0,0]	1	ID=B16_464-2,ID=B16_464-1,ID=B16_474-3,ID=EL4_27_3,ID=B16_451-4	NA	NA
Kank1	chr19	25236975	25434496	+	4	1.93237	0.00493079	0.0299137	4 [1,3]	0 [0,0]	1	ID=B16_502-3,ID=EL4_59-1,ID=B16_462-4,ID=EL4_47-2	NA	NA
Pdzrn3	chr6	101149609	101377897	-	6	2.89855	0.00496066	0.030054	6 [4,2]	0 [0,0]	1	ID=B16_463-1,ID=B16_487-4,ID=LLC_168-1,ID=B16_497-1,ID=B16_451-3,ID=B16_462-4	NA	NA
Ankrd28	chr14	31700015	31830415	-	4	1.93237	0.00499923	0.030226	4 [2,2]	0 [0,0]	1	ID=B16_474-3,ID=B16_497-1,ID=B16_462-4,ID=B16_484-2	NA	NA
Pcdha2	chr18	36939205	37187657	+	10	4.83092	0.00501277	0.0302873	10 [3,7]	0 [0,0]	1	ID=B16_463-1,ID=B16_464-2,ID=B16_464-1,ID=B16_450-1,ID=B16_474-3,ID=B16_489-1,ID=B16_451-5,ID=B16_462-4,ID=B16PD1_163-3,ID=B16_484-1	NA	NA
Foxn2	chr17	88440711	88490533	+	11	5.31401	0.00503481	0.0303999	11 [6,5]	0 [0,0]	1	ID=EL4_28_1,ID=EL4_28_3,ID=EL4_26_4,ID=EL4_18_2,ID=B16_460-1,ID=EL4_22_3,ID=B16PD1_537_2,ID=EL4_32_3,ID=B16_450-3,ID=B16_499-1,ID=B16_499-2	NA	NA
4933430I17Rik	chr4	62525369	62547993	+	6	2.89855	0.00504137	0.0304189	3 [0,3]	3 [2,1]	1	ID=B16_464-1,ID=B16_498-1,ID=B16_502-1,ID=B16_450-3,ID=B16_499-2,ID=B16_491-2	NA	NA
Rom1	chr19	8927382	8929356	-	2	0.966184	0.00509944	0.0307276	1 [0,1]	1 [1,0]	1	ID=B16_464-2,ID=B16_491-3	NA	NA
Rpl31-ps13	chr13	100415565	100415942	+	2	0.966184	0.00509944	0.0307276	0 [0,0]	2 [2,0]	1	ID=B16_455-1,ID=B16_451-4	NA	NA
Prkcb	chr7	122288751	122634399	+	11	5.31401	0.00512065	0.0308346	11 [5,6]	0 [1,-1]	1	ID=B16_463-1,ID=B16_488-3,ID=B16_464-2,ID=B16_464-1,ID=B16_498-1,ID=EL4_18_2,ID=B16_502-3,ID=B16_460-1,ID=B16_16-2,ID=B16_499-1,ID=B16_451-5	NA	NA
Trappc9	chr15	72589621	73061204	-	17	8.21256	0.0051775	0.0311559	17 [4,13]	0 [0,0]	1	ID=B16_463-1,ID=B16_464-2,ID=B16_464-1,ID=B16_485-1,ID=B16_450-1,ID=B16_519-1,ID=B16_486-3,ID=EL4PD1_113-1,ID=EL4_36_3,ID=B16_450-3,ID=B16_449-4,ID=B16_499-1,ID=EL4_48-1,ID=B16_462-4,ID=EL4PD1_105-2,ID=B16_491-3,ID=B16_491-2	NA	NA
St7	chr6	17693947	17943022	+	10	4.83092	0.00518834	0.0311604	10 [4,6]	0 [0,0]	1	ID=B16_464-2,ID=EL4PD1_116-3,ID=B16_487-4,ID=B16_498-2,ID=B16_460-1,ID=EL4_19_2,ID=EL4_34_5,ID=EL4_36_4,ID=B16_491-3,ID=B16_474-2	NA	NA
Tango6	chr8	106683068	106851439	+	3	1.44928	0.00518856	0.0311604	3 [1,2]	0 [0,0]	1	ID=B16_474-3,ID=B16_474-4,ID=B16_486-3	NA	NA
Ift80	chr3	68892499	69004559	-	2	0.966184	0.00519758	0.0311925	2 [1,1]	0 [0,0]	1	ID=B16_497-1,ID=B16_491-3	NA	NA
Phtf2	chr5	20758663	20882124	-	3	1.44928	0.00520878	0.0312386	3 [1,2]	0 [0,0]	1	ID=B16_463-1,ID=B16_499-2,ID=B16_491-3	NA	NA
Ksr2	chr5	117414000	117775003	+	10	4.83092	0.00521755	0.0312702	10 [5,5]	0 [0,0]	1	ID=B16_502-3,ID=B16_460-1,ID=B16_474-4,ID=B16_486-3,ID=B16_489-1,ID=B16_475-2,ID=B16_484-4,ID=B16_484-1,ID=EL4_54-2,ID=B16_491-3	NA	NA
Hrct1	chr4	43727188	43728639	+	2	0.966184	0.00522175	0.0312744	0 [0,0]	2 [0,2]	1	ID=B16_464-2,ID=B16_487-4	NA	NA
AC116589.5	chr13	65487439	65624203	+	3	1.44928	0.0052658	0.031517	2 [1,1]	1 [0,1]	1	ID=EL4_28_4,ID=B16_474-3,ID=B16_484-1	NA	NA
Gnaq	chr19	16132831	16387463	+	10	4.83092	0.00527276	0.0315234	10 [4,6]	0 [0,0]	1	ID=B16_464-1,ID=B16_485-1,ID=LLC_172-2,ID=EL4_38_3,ID=B16_489-1,ID=B16_450-3,ID=B16_451-5,ID=EL4_48-1,ID=B16_462-4,ID=B16_484-1	NA	NA
Cela2a	chr4	141814962	141826160	-	4	1.93237	0.00527395	0.0315234	1 [0,1]	3 [3,0]	1	ID=B16_464-1,ID=B16_460-1,ID=B16_474-4,ID=B16_462-4	NA	NA
Stk17b	chr1	53755506	53785224	-	9	4.34783	0.00531401	0.0317416	8 [5,3]	1 [0,1]	1	ID=B16_463-1,ID=B16_485-1,ID=EL4PD1_149-4,ID=B16_474-4,ID=B16_489-1,ID=B16_499-1,ID=B16_462-4,ID=EL4_65-1,ID=LLC_167-1	NA	NA
Parp8	chr13	116854824	117025516	-	5	2.41546	0.00540003	0.0322122	5 [2,3]	0 [0,0]	1	ID=B16_488-3,ID=B16_464-2,ID=B16_450-1,ID=B16_474-3,ID=B16_451-3	NA	NA
Nfyc	chr4	120757438	120831572	-	14	6.76329	0.00541531	0.0322818	14 [9,5]	0 [0,0]	1	ID=B16_488-3,ID=B16_464-2,ID=B16_485-3,ID=B16_450-1,ID=B16_502-3,ID=B16_502-1,ID=B16_460-1,ID=B16_474-3,ID=B16_474-4,ID=B16_489-1,ID=B16_450-3,ID=B16_462-4,ID=B16_484-1,ID=B16_491-2	NA	NA
Wls	chr3	159839737	159938664	+	2	0.966184	0.00542835	0.0323379	2 [1,1]	0 [0,0]	1	ID=EL4PD1_149-4,ID=B16_474-5	NA	NA
Dlc1	chr8	36570249	36952442	-	19	9.17874	0.00543269	0.0323421	19 [9,10]	0 [0,0]	1	ID=EL4_41-1,ID=B16_464-2,ID=B16_464-1,ID=B16_487-4,ID=B16_498-2,ID=B16_502-3,ID=B16_460-1,ID=B16_474-3,ID=B16_474-4,ID=B16_497-1,ID=EL4_33_2,ID=B16_489-1,ID=B16_450-3,ID=B16_499-1,ID=B16_462-4,ID=B16_484-1,ID=B16_499-2,ID=EL4_61-2,ID=B16_491-3	NA	NA
Kcnj6	chr16	94749266	94997696	-	6	2.89855	0.0054383	0.0323539	6 [3,3]	0 [0,0]	1	ID=B16_488-3,ID=B16_498-2,ID=B16_474-3,ID=EL4PD1_115-3,ID=B16_489-1,ID=B16_491-3	NA	NA
Kif26a	chr12	112146208	112181747	+	5	2.41546	0.00547169	0.0324482	5 [4,1]	0 [0,0]	1	ID=B16_455-2,ID=EL4_18_2,ID=EL4_59-1,ID=B16_449-4,ID=LLC_169-2	NA	NA
Olfr808	chr10	129765482	129771713	+	4	1.93237	0.00547202	0.0324482	1 [1,0]	3 [2,1]	1	ID=B16_463-1,ID=B16_487-4,ID=EL4_67-2,ID=B16_499-2	NA	NA
Rps11	chr7	45122379	45124439	-	2	0.966184	0.00547236	0.0324482	0 [0,0]	2 [0,2]	1	ID=B16_450-3,ID=B16_484-4	NA	NA
Ncoa2	chr1	13139159	13374083	-	30	14.4928	0.00548185	0.0324829	30 [17,13]	0 [0,0]	0.994635	ID=B16_463-1,ID=EL4_28_4,ID=B16_488-3,ID=B16_101NT-3,ID=B16_464-2,ID=B16_464-1,ID=B16_485-1,ID=B16_487-2,ID=EL4PD1_114-3,ID=B16_498-2,ID=B16_498-1,ID=B16_502-3,ID=EL4_49-1,ID=B16_460-1,ID=B16_474-3,ID=EL4PD1_113-2,ID=EL4_52-5,ID=EL4_39-4,ID=EL4_67-2,ID=EL4_64-5,ID=EL4PD1_157-1,ID=B16_489-1,ID=B16_499-1,ID=B16_451-3,ID=B16_474-1,ID=LLC_170-1,ID=B16_484-4,ID=EL4PD1_119-1,ID=EL4_54-4,ID=B16_499-2	predicted cancer driver	NA
Gp5	chr16	30307686	30310779	-	3	1.44928	0.00548763	0.0324955	0 [0,0]	3 [0,3]	1	ID=EL4_60-1,ID=EL4_39-4,ID=EL4_54-2	NA	NA
Opcml	chr9	27790947	28925410	+	80	38.6473	0.00552079	0.0326362	80 [38,42]	0 [0,0]	0.984797	ID=B16_463-1,ID=B16PD1_534_1,ID=EL4_28_2,ID=B16_488-3,ID=B16_464-2,ID=B16_464-1,ID=B16_485-1,ID=B16_487-4,ID=B16_485-3,ID=B16_487-2,ID=EL4PD1_114-3,ID=B16_450-1,ID=B16_498-2,ID=B16_498-1,ID=B16_519-3,ID=B16_502-3,ID=B16_502-1,ID=EL4_49-1,ID=B16_452-1,ID=B16_460-1,ID=EL4_45-1,ID=EL4_22_3,ID=EL4_37_2,ID=B16PD1_537_2,ID=B16_485-2,ID=B16PD1_161-4,ID=B16_474-3,ID=B16_474-4,ID=B16_474-5,ID=B16_497-1,ID…	NA	NA
Olfr979	chr9	39998003	40003465	-	4	1.93237	0.00552238	0.0326362	3 [1,2]	1 [0,1]	0.999576	ID=B16_488-3,ID=B16_502-3,ID=B16_450-3,ID=B16_462-4	NA	NA
Uggt2	chr14	118985039	119099430	-	2	0.966184	0.00551912	0.0326362	2 [2,0]	0 [0,0]	1	ID=B16_463-1,ID=B16_485-2	NA	NA
Ephb1	chr9	101922128	102354693	-	44	21.256	0.00555694	0.0327973	44 [9,35]	0 [0,0]	0.960331	ID=B16_463-1,ID=B16_455-2,ID=B16_455-1,ID=B16_488-3,ID=B16_464-2,ID=B16_456-4,ID=EL4PD1_116-3,ID=B16_485-1,ID=B16_485-3,ID=B16_487-2,ID=EL4PD1_114-3,ID=B16_519-1,ID=B16_502-3,ID=B16_460-1,ID=EL4_46-2,ID=B16PD1_537_4,ID=B16_474-3,ID=B16_474-4,ID=B16_497-1,ID=B16_525-2,ID=B16_525-1,ID=B16_485-4,ID=B16_521-1,ID=B16_454-3,ID=B16_517-1,ID=B16_489-1,ID=B16_450-3,ID=B16_449-4,ID=B16_522-1,ID=B16_499-1,I…	NA	NA
Olfr917	chr9	38664913	38665842	-	3	1.44928	0.00556067	0.0327973	0 [0,0]	3 [3,0]	1	ID=B16_502-1,ID=B16_474-3,ID=B16_491-2	NA	NA
Chrdl1	chrX	143285684	143394262	-	2	0.966184	0.00555849	0.0327973	2 [0,2]	0 [0,0]	1	ID=B16_502-3,ID=B16_474-4	NA	NA
Herc1	chr9	66350526	66508775	+	6	2.89855	0.00557276	0.0328468	6 [3,3]	0 [0,0]	1	ID=B16_464-1,ID=B16_474-4,ID=B16_474-5,ID=B16_485-4,ID=EL4_67-2,ID=B16_489-1	NA	NA
Mapk8ip3	chr17	24892153	24936938	-	8	3.86473	0.00558596	0.0329029	8 [4,4]	0 [0,0]	0.897863	ID=B16_498-2,ID=B16_519-3,ID=B16_452-1,ID=B16_521-2,ID=B16_517-1,ID=B16_484-4,ID=B16_524-1,ID=B16_491-3	NA	NA
Spata5	chr3	37419896	37579096	+	6	2.89855	0.00560999	0.0330226	6 [5,1]	0 [0,0]	1	ID=B16_463-1,ID=B16_488-3,ID=B16_464-2,ID=B16_464-1,ID=B16_485-4,ID=B16_474-1	NA	NA
Olfr679	chr7	105081205	105090642	+	5	2.41546	0.0057055	0.03356	4 [2,2]	1 [1,0]	1	ID=EL4PD1_116-2,ID=B16_460-1,ID=B16_474-4,ID=B16_491-2,ID=B16_520-1	NA	NA
AC155921.1	chr9	36672697	36676537	+	3	1.44928	0.00570881	0.03356	1 [0,1]	2 [1,1]	1	ID=EL4_36_4,ID=B16_474-1,ID=B16_491-2	NA	NA
1700029I15Rik	chr2	92382918	92385708	+	2	0.966184	0.00573104	0.0336463	0 [0,0]	2 [2,0]	1	ID=B16_502-3,ID=B16_499-2	NA	NA
Elmo1	chr13	20090619	20608353	+	26	12.5604	0.00574698	0.0337176	26 [15,11]	0 [0,0]	0.999853	ID=B16_463-1,ID=B16_488-3,ID=EL4_26_4,ID=B16_101NT-3,ID=B16_464-2,ID=B16_464-1,ID=B16_456-4,ID=B16_485-1,ID=B16_485-3,ID=B16_450-1,ID=B16_498-1,ID=B16_502-3,ID=B16_452-1,ID=B16_474-3,ID=B16_474-4,ID=B16_497-1,ID=EL4_27_3,ID=B16_485-4,ID=B16_1-1,ID=EL4_24_1,ID=B16_453-2,ID=B16_474-1,ID=B16_484-4,ID=B16_484-1,ID=EL4_54-2,ID=B16_499-2	predicted cancer driver	NA
Adamts2	chr11	50602084	50807573	+	3	1.44928	0.00577147	0.0338391	3 [1,2]	0 [0,0]	1	ID=B16_484-1,ID=B16_499-2,ID=B16_491-3	NA	NA
Upf2	chr2	5951469	6056703	+	2	0.966184	0.0058235	0.0340993	2 [0,2]	0 [0,0]	1	ID=B16_450-1,ID=B16_502-3	NA	NA
AC160114.3	chr13	63661797	63662161	+	2	0.966184	0.00586344	0.0343106	0 [0,0]	2 [0,2]	1	ID=B16_101NT-3,ID=B16_464-1	NA	NA
Fam135a	chr1	24011245	24100194	-	18	8.69565	0.0058896	0.034441	18 [8,10]	0 [0,0]	0.999809	ID=B16_463-1,ID=EL4_28_1,ID=B16_464-2,ID=B16_464-1,ID=B16_498-2,ID=B16_498-1,ID=LLC_172-2,ID=B16_460-1,ID=EL4_19_2,ID=B16_497-2,ID=EL4_32_3,ID=B16_486-3,ID=EL4_67-2,ID=B16_489-1,ID=B16_499-1,ID=B16_462-4,ID=B16_474-1,ID=LLC_170-1	NA	NA
Phactr2	chr10	13207717	13474412	-	10	4.83092	0.00589345	0.034441	9 [7,2]	1 [1,0]	1	ID=B16_463-1,ID=B16_464-1,ID=B16_502-3,ID=B16_460-1,ID=B16_489-1,ID=B16_499-1,ID=B16_451-5,ID=EL4_62-1,ID=B16_474-1,ID=B16_499-2	NA	NA
Olfr916	chr9	38655052	38659875	-	4	1.93237	0.0059375	0.0346756	0 [0,0]	4 [3,1]	1	ID=B16_464-2,ID=B16_502-3,ID=B16_489-1,ID=B16_450-3	NA	NA
Pik3c2g	chr6	139715861	139969284	+	10	4.83092	0.00595549	0.0347579	10 [5,5]	0 [0,0]	1	ID=B16_463-1,ID=B16_464-2,ID=B16_474-3,ID=B16_474-4,ID=EL4PD1_115-2,ID=B16_489-1,ID=B16_451-3,ID=B16_462-4,ID=EL4_54-2,ID=B16_499-2	NA	NA
Mrps28	chr3	8802146	8923918	-	2	0.966184	0.00596303	0.0347791	2 [0,2]	0 [0,0]	1	ID=B16_474-4,ID=B16_462-4	NA	NA
Grik1	chr16	87895902	88290258	-	22	10.628	0.00596857	0.0347887	22 [15,7]	0 [0,0]	1	ID=B16_455-1,ID=B16_464-2,ID=B16_464-1,ID=EL4PD1_116-3,ID=B16_450-1,ID=B16_498-2,ID=B16_502-3,ID=B16_460-1,ID=B16PD1_537_4,ID=B16_474-3,ID=B16_474-4,ID=B16_521-2,ID=EL4_36_3,ID=B16_489-1,ID=B16_450-3,ID=B16_499-1,ID=B16_453-2,ID=B16_461-1,ID=B16_462-4,ID=B16_474-1,ID=B16_499-2,ID=B16_491-2	NA	NA
Actn2	chr13	12269426	12340760	-	12	5.7971	0.00600257	0.034964	12 [7,5]	0 [0,0]	0.968967	ID=B16_488-3,ID=B16_101NT-3,ID=B16_485-1,ID=B16_498-2,ID=B16_498-1,ID=B16_497-1,ID=B16_497-2,ID=EL4_36_3,ID=B16_489-1,ID=B16_449-3,ID=B16_499-2,ID=B16_491-2	NA	NA
Dync1i1	chr6	5725639	6028039	+	13	6.28019	0.00602281	0.0350003	13 [7,6]	0 [0,0]	0.972633	ID=EL4_28_3,ID=B16_488-3,ID=EL4_63-1,ID=B16_498-1,ID=B16_502-3,ID=EL4_32_1,ID=B16PD1_537_4,ID=B16_474-4,ID=EL4_27_3,ID=EL4_67-2,ID=B16_489-1,ID=B16_484-4,ID=LLC_167-1	NA	NA
Ppm1h	chr10	122678782	122945795	+	8	3.86473	0.0060197	0.0350003	8 [6,2]	0 [0,0]	1	ID=EL4_41-1,ID=B16_485-1,ID=B16_450-1,ID=B16_485-2,ID=B16_474-5,ID=B16_497-1,ID=B16_499-1,ID=B16_462-4	NA	NA
Acaa1a	chr9	119341294	119350299	+	3	1.44928	0.00601344	0.0350003	2 [2,0]	1 [0,1]	1	ID=B16_463-1,ID=EL4_59-1,ID=EL4_55-2	NA	NA
Tspan7	chrX	10485158	10596605	+	2	0.966184	0.00602451	0.0350003	2 [0,2]	0 [0,0]	1	ID=EL4_28_4,ID=EL4_28_1	NA	NA
Sv2c	chr13	95954594	96132577	-	4	1.93237	0.00607492	0.0352472	4 [2,2]	0 [0,0]	1	ID=B16_474-3,ID=B16_474-4,ID=B16_450-3,ID=B16_462-4	NA	NA
Brip1	chr11	86058138	86201193	-	4	1.93237	0.00607492	0.0352472	4 [4,0]	0 [0,0]	0.816338	ID=B16_464-2,ID=B16_450-3,ID=B16_462-4,ID=EL4_29_2	NA	NA
Olfr856-ps1	chr9	19657057	19658647	-	3	1.44928	0.00609136	0.0353196	0 [0,0]	3 [1,2]	1	ID=B16_487-4,ID=B16_498-1,ID=B16_499-2	NA	NA
Apbb2	chr5	66298728	66618784	-	11	5.31401	0.00612064	0.035454	11 [6,5]	0 [0,0]	1	ID=B16_463-1,ID=EL4_28_4,ID=B16_488-3,ID=B16_464-2,ID=B16_460-1,ID=B16_474-4,ID=B16_497-1,ID=EL4_59-1,ID=B16_485-4,ID=B16_489-1,ID=B16_462-4	NA	NA
AC164161.3	chr9	102819861	102820950	-	2	0.966184	0.00613443	0.035454	0 [0,0]	2 [1,1]	1	ID=B16_502-3,ID=B16_474-4	NA	NA
Cyp2j7-ps3	chr4	96151653	96151858	-	2	0.966184	0.00613443	0.035454	0 [0,0]	2 [0,2]	1	ID=B16_474-3,ID=B16_451-3	NA	NA
Cdca8	chr4	124918465	124936917	-	5	2.41546	0.00615338	0.0355405	3 [1,2]	2 [0,2]	1	ID=B16_464-2,ID=B16_450-1,ID=B16_485-4,ID=B16_451-3,ID=B16_462-4	NA	NA
Lclat1	chr17	73107994	73243368	+	3	1.44928	0.00618907	0.0357234	2 [2,0]	1 [0,1]	1	ID=B16_450-1,ID=LLC_172-2,ID=B16_502-3	NA	NA
Slx4ip	chr2	136891608	137071950	+	6	2.89855	0.00619367	0.0357268	6 [3,3]	0 [0,0]	1	ID=B16_463-1,ID=B16PD1_537_1,ID=B16_474-3,ID=EL4_64-1,ID=B16_484-1,ID=EL4_61-2	NA	NA
Nlk	chr11	78567168	78697373	-	3	1.44928	0.00622277	0.0358715	3 [1,2]	0 [0,0]	1	ID=B16_464-2,ID=B16_498-1,ID=B16_462-4	predicted cancer driver	NA
Tmem241	chr18	11981478	12121468	-	2	0.966184	0.0062324	0.0359038	2 [1,1]	0 [0,0]	1	ID=B16_499-1,ID=B16_474-1	NA	NA
Dock1	chr7	134670687	135173639	+	21	10.1449	0.00626761	0.0359967	21 [9,12]	0 [0,0]	0.999518	ID=EL4_28_4,ID=B16_488-3,ID=B16_101NT-3,ID=B16_464-2,ID=B16_464-1,ID=B16_485-1,ID=B16_487-4,ID=B16_498-1,ID=B16_460-1,ID=EL4_45-1,ID=B16PD1_537_2,ID=B16_474-3,ID=B16_497-1,ID=B16_486-3,ID=B16_485-4,ID=B16_1-1,ID=B16_450-3,ID=EL4_44-2,ID=EL4_62-1,ID=EL4PD1_118-1,ID=B16_491-3	NA	NA
Gpr45	chr1	42952963	43035456	+	14	6.76329	0.00626521	0.0359967	13 [8,5]	1 [0,1]	1	ID=B16_463-1,ID=B16_464-1,ID=B16_498-1,ID=B16_460-1,ID=EL4_67-1,ID=EL4_64-5,ID=B16_489-1,ID=B16_499-1,ID=EL4_65-1,ID=EL4_44-2,ID=EL4_62-1,ID=B16_484-1,ID=B16_484-2,ID=B16_520-1	NA	NA
Gfral	chr9	76164102	76213657	-	11	5.31401	0.0062554	0.0359967	11 [6,5]	0 [0,0]	1	ID=B16_460-1,ID=B16_474-3,ID=B16_474-4,ID=EL4_27_3,ID=EL4_67-2,ID=EL4_64-1,ID=B16_489-1,ID=B16_13-3,ID=B16_453-2,ID=B16_462-4,ID=EL4_62-1	NA	NA
Stk25	chr1	93627132	93658659	-	7	3.38164	0.00626021	0.0359967	6 [4,2]	1 [1,0]	1	ID=B16_101NT-3,ID=B16_464-1,ID=B16_502-3,ID=B16_499-1,ID=B16_462-4,ID=B16_484-1,ID=B16_491-2	NA	NA
Slc16a2	chrX	103697414	103821983	-	2	0.966184	0.00627681	0.0359967	1 [0,1]	1 [0,1]	1	ID=B16_463-1,ID=B16_464-2	NA	NA
Neb	chr2	52136647	52338798	-	7	3.38164	0.00628276	0.0360077	7 [4,3]	0 [0,0]	1	ID=B16_498-2,ID=B16_498-1,ID=B16_502-3,ID=B16_474-3,ID=B16_499-1,ID=B16_462-4,ID=B16_499-2	NA	NA
Pcdha5	chr18	36960440	37187657	+	9	4.34783	0.00630617	0.0361186	9 [2,7]	0 [0,0]	1	ID=B16_463-1,ID=B16_464-2,ID=B16_464-1,ID=B16_450-1,ID=B16_489-1,ID=B16_451-5,ID=B16_462-4,ID=B16PD1_163-3,ID=B16_484-1	NA	NA
Stk39	chr2	68210445	68472268	-	9	4.34783	0.00631062	0.0361209	9 [6,3]	0 [0,0]	1	ID=B16_464-2,ID=B16_464-1,ID=B16_450-1,ID=EL4_64-1,ID=B16_450-3,ID=B16_451-5,ID=LLC_174-3,ID=B16_474-1,ID=EL4_54-2	predicted cancer driver	human T-ALL driver
Ppargc1a	chr5	51458180	51567704	-	2	0.966184	0.00635152	0.0363316	2 [1,1]	0 [0,0]	1	ID=B16_463-1,ID=B16_502-3	NA	NA
Fam19a4	chr6	96831203	97060413	-	8	3.86473	0.006379	0.0364655	6 [2,4]	2 [2,0]	1	ID=B16_464-2,ID=B16_464-1,ID=B16_460-1,ID=EL4_27_3,ID=B16_486-3,ID=EL4_38_3,ID=B16_469-1,ID=EL4_62-1	NA	NA
4932438A13Rik	chr3	36863106	37053033	+	9	4.34783	0.00640929	0.0366151	9 [6,3]	0 [0,0]	1	ID=B16_464-2,ID=B16_502-3,ID=B16_474-3,ID=B16_474-4,ID=B16_497-1,ID=EL4PD1_114-1,ID=B16_485-4,ID=B16_484-1,ID=EL4PD1_118-1	NA	NA
AC103936.1	chr9	94592196	94592508	+	2	0.966184	0.00641375	0.0366171	0 [0,0]	2 [0,2]	1	ID=B16_502-3,ID=B16_450-3	NA	NA
Unc79	chr12	102948859	103184001	+	8	3.86473	0.00648937	0.0370251	8 [4,4]	0 [0,0]	1	ID=B16_463-1,ID=B16_488-3,ID=B16_464-2,ID=B16_464-1,ID=B16_498-1,ID=EL4_48-4,ID=B16_499-1,ID=B16_491-3	NA	NA
1700012P22Rik	chr4	144418189	144438772	-	6	2.89855	0.0064942	0.037029	3 [2,1]	3 [2,1]	1	ID=B16_460-1,ID=B16_474-3,ID=B16_474-4,ID=B16_489-1,ID=B16_451-3,ID=B16_491-3	NA	NA
Tshz2	chr2	169633013	169913093	+	7	3.38164	0.00652903	0.0371919	7 [2,5]	0 [0,0]	1	ID=B16_463-1,ID=B16_464-2,ID=B16_486-3,ID=B16_489-1,ID=B16_499-2,ID=EL4_61-2,ID=B16_491-3	NA	NA
Tg	chr15	66670753	66850721	+	4	1.93237	0.00653112	0.0371919	4 [2,2]	0 [0,0]	1	ID=B16_464-1,ID=B16_474-3,ID=B16_499-1,ID=EL4_62-1	NA	NA
Tctex1d2	chr16	32419702	32429099	+	4	1.93237	0.00654478	0.0372459	3 [0,3]	1 [0,1]	1	ID=EL4PD1_114-3,ID=B16_474-4,ID=EL4_59-1,ID=EL4PD1_152-1	NA	NA
Fut1	chr7	45617606	45621059	+	2	0.966184	0.00655657	0.0372892	0 [0,0]	2 [0,2]	1	ID=B16_464-2,ID=B16_451-5	NA	NA
Pcdha8	chr18	36992371	37187657	+	7	3.38164	0.00657653	0.0373789	7 [2,5]	0 [0,0]	1	ID=B16_463-1,ID=B16_464-1,ID=B16_450-1,ID=B16_489-1,ID=B16_451-5,ID=B16PD1_163-3,ID=B16_484-1	NA	NA
Ndst4	chr3	125404076	125728899	+	20	9.66184	0.00660024	0.0374897	20 [13,7]	0 [0,0]	0.950953	ID=B16_463-1,ID=B16_488-3,ID=B16_101NT-3,ID=B16_464-2,ID=B16_464-1,ID=B16_485-3,ID=B16_502-3,ID=B16_460-1,ID=B16_474-3,ID=B16_474-4,ID=B16_497-1,ID=EL4_67-2,ID=EL4_64-5,ID=B16_489-1,ID=B16_450-3,ID=B16_449-3,ID=B16_499-1,ID=B16_462-4,ID=EL4_65-1,ID=B16_491-3	NA	NA
Olfr774	chr10	129236204	129239403	+	3	1.44928	0.00665683	0.037763	1 [0,1]	2 [0,2]	1	ID=EL4_32_3,ID=B16_499-1,ID=B16_451-5	NA	NA
Calcrl	chr2	84330626	84425411	-	2	0.966184	0.00675445	0.038268	2 [0,2]	0 [0,0]	0.52076	ID=B16_485-2,ID=B16_474-5	NA	NA
Il1rn	chr2	24336853	24351494	+	5	2.41546	0.00680554	0.0385086	5 [2,3]	0 [0,0]	1	ID=EL4_26_4,ID=B16_464-1,ID=B16_450-3,ID=EL4_65-1,ID=EL4_62-1	NA	NA
St6galnac5	chr3	152817081	152982246	-	3	1.44928	0.00680302	0.0385086	2 [1,1]	1 [0,1]	1	ID=EL4_18_2,ID=B16_474-3,ID=B16_499-2	NA	NA
Des	chr1	75360329	75368579	+	3	1.44928	0.0069101	0.0390258	2 [0,2]	1 [1,0]	1	ID=B16_463-1,ID=B16_464-1,ID=B16_499-1	NA	NA
Dlk1	chr12	109452849	109463336	+	3	1.44928	0.0069101	0.0390258	3 [0,3]	0 [0,0]	1	ID=B16_450-1,ID=B16_485-4,ID=B16_450-3	NA	NA
Slf1	chr13	77043088	77135473	-	2	0.966184	0.00697631	0.0393748	2 [2,0]	0 [0,0]	1	ID=B16_502-3,ID=B16_460-1	NA	NA
Tnp1	chr1	73015074	73015909	-	2	0.966184	0.00699781	0.0394712	1 [0,1]	1 [0,1]	1	ID=B16_463-1,ID=B16_487-4	NA	NA
Pcdha3	chr18	36946105	37187657	+	10	4.83092	0.00700813	0.0395044	9 [2,7]	1 [1,0]	1	ID=B16_463-1,ID=B16_464-2,ID=B16_464-1,ID=B16_450-1,ID=B16_474-3,ID=B16_489-1,ID=B16_451-5,ID=B16_462-4,ID=B16PD1_163-3,ID=B16_484-1	NA	NA
Khdrbs3	chr15	68928420	69093512	+	4	1.93237	0.0070906	0.0398684	4 [2,2]	0 [0,0]	0.806385	ID=B16_498-1,ID=B16_525-2,ID=EL4_65-1,ID=B16_14-1	NA	NA
Nupr1l	chr5	129908542	129913789	+	3	1.44928	0.00708264	0.0398684	2 [1,1]	1 [0,1]	1	ID=B16_455-1,ID=B16_16-2,ID=B16_486-3	NA	NA
Snx12	chrX	101097786	101222553	-	3	1.44928	0.00708809	0.0398684	3 [1,2]	0 [0,0]	1	ID=B16_474-4,ID=EL4PD1_115-3,ID=EL4_36_2	NA	NA
Ulk4	chr9	120964454	121277197	-	7	3.38164	0.00710616	0.0399307	7 [4,3]	0 [0,0]	1	ID=B16_464-1,ID=B16_487-2,ID=B16_474-3,ID=B16_489-1,ID=B16_450-3,ID=EL4_62-1,ID=B16_484-2	NA	NA
Frmd5	chr2	121545529	121807087	-	9	4.34783	0.00714762	0.0401384	9 [5,4]	0 [0,0]	1	ID=B16_464-2,ID=B16_464-1,ID=B16_450-1,ID=B16_498-1,ID=B16_474-3,ID=B16_474-4,ID=EL4_48-4,ID=B16_522-1,ID=B16_451-5	NA	NA
Mnat1	chr12	73123717	73273988	+	5	2.41546	0.0071849	0.0403223	5 [4,1]	0 [0,0]	1	ID=B16_463-1,ID=EL4_28_1,ID=B16_464-2,ID=B16_464-1,ID=B16_499-1	NA	NA
Fbxo28	chr1	182313102	182341618	-	7	3.38164	0.00724725	0.0406466	7 [4,3]	0 [0,0]	0.885613	ID=B16_4-2,ID=B16_12-3,ID=B16_486-3,ID=B16_454-3,ID=EL4_36_3,ID=B16_2-2,ID=B16_499-1	NA	NA
Sgpp2	chr1	78310345	78420289	+	16	7.72947	0.00728806	0.0408498	16 [9,7]	0 [0,0]	0.941131	ID=B16_463-1,ID=B16_464-1,ID=B16_487-4,ID=B16_498-1,ID=B16_519-1,ID=B16_502-1,ID=B16_474-3,ID=B16_474-5,ID=EL4_67-2,ID=EL4_64-5,ID=B16_521-1,ID=B16_489-1,ID=B16_499-1,ID=B16_484-2,ID=EL4PD1_118-1,ID=B16_524-1	NA	NA
Ndufaf6	chr4	11051045	11076204	-	6	2.89855	0.00730979	0.0409201	6 [4,2]	0 [0,0]	1	ID=B16_464-2,ID=B16_474-4,ID=B16_499-1,ID=B16_475-1,ID=B16_462-4,ID=B16_484-4	NA	NA
Tspear	chr10	77686569	77886769	+	3	1.44928	0.00730535	0.0409201	3 [2,1]	0 [0,0]	1	ID=B16_455-1,ID=B16_464-1,ID=EL4_62-1	NA	NA
Crim1	chr17	78200248	78376592	+	4	1.93237	0.00732619	0.0409862	4 [1,3]	0 [0,0]	1	ID=B16_464-2,ID=B16_485-1,ID=B16_502-3,ID=B16_13-1	NA	NA
Kiz	chr2	146855864	146970097	+	2	0.966184	0.00733718	0.0410219	1 [1,0]	1 [1,0]	0.691127	ID=B16_488-3,ID=B16_462-4	NA	NA
Sorcs2	chr5	36017180	36398124	-	9	4.34783	0.00738717	0.0412755	9 [3,6]	0 [0,0]	1	ID=B16_450-1,ID=B16_498-1,ID=B16_519-3,ID=B16_502-3,ID=B16_521-1,ID=EL4_36_3,ID=B16_518-1,ID=B16_462-4,ID=B16_484-2	NA	NA
Gabrg1	chr5	70751047	70842617	-	2	0.966184	0.00740687	0.0413597	2 [2,0]	0 [0,0]	1	ID=B16_474-4,ID=EL4PD1_157-2	NA	NA
Dock3	chr9	106892825	107231909	-	18	8.69565	0.00742528	0.0414365	18 [6,12]	0 [0,0]	1	ID=B16PD1_534_3,ID=B16_464-1,ID=B16_487-4,ID=EL4_68-1,ID=EL4_18_2,ID=B16_502-1,ID=EL4_49-1,ID=B16_474-4,ID=B16_497-1,ID=B16_489-1,ID=B16_450-3,ID=EL4PD1_118-2,ID=B16_451-3,ID=EL4_48-1,ID=B16_462-4,ID=B16_484-4,ID=B16_484-1,ID=B16_491-3	NA	NA
Cadps	chr14	12372563	12823079	-	23	11.1111	0.00743216	0.0414427	23 [16,7]	0 [0,0]	1	ID=B16_464-2,ID=B16_464-1,ID=EL4PD1_156-2,ID=B16_450-1,ID=B16_460-1,ID=B16_474-3,ID=B16_474-4,ID=EL4PD1_153-3,ID=EL4PD1_154-1,ID=B16_517-1,ID=B16_450-3,ID=B16_499-1,ID=B16_451-3,ID=B16PD1_160-2,ID=EL4PD1_117-1,ID=B16_524-2,ID=B16_524-1,ID=EL4_54-2,ID=B16_499-2,ID=B16_515-2,ID=EL4PD1_152-1,ID=B16_516-2,ID=B16_491-2	NA	NA
Kcnc2	chr10	112271121	112466304	+	8	3.86473	0.00743569	0.0414427	8 [8,0]	0 [0,0]	1	ID=B16_463-1,ID=B16_488-3,ID=B16_464-2,ID=B16_499-1,ID=B16_451-5,ID=B16_462-4,ID=B16_491-3,ID=B16_491-2	NA	NA
Osbpl6	chr2	76406538	76600647	+	6	2.89855	0.00749337	0.041712	6 [5,1]	0 [0,0]	1	ID=B16_464-1,ID=B16_450-1,ID=EL4_22_3,ID=B16_521-1,ID=B16_499-1,ID=B16_484-1	NA	NA
A4gnt	chr9	99612502	99622367	+	4	1.93237	0.00750667	0.0417339	2 [1,1]	2 [0,2]	1	ID=B16_488-3,ID=EL4_22_3,ID=B16_474-4,ID=B16_450-3	NA	NA
Marveld3	chr8	109947914	109962168	-	4	1.93237	0.00750667	0.0417339	3 [1,2]	1 [1,0]	1	ID=EL4_28_4,ID=EL4_19_2,ID=EL4_32_3,ID=B16_474-1	NA	NA
Mboat2	chr12	24831609	24964397	+	2	0.966184	0.00753043	0.0418399	2 [2,0]	0 [0,0]	1	ID=B16_474-4,ID=B16_462-4	NA	NA
Rimbp2	chr5	128760401	128953362	-	3	1.44928	0.0075525	0.0419364	3 [2,1]	0 [0,0]	1	ID=B16_488-3,ID=B16_462-4,ID=B16_491-3	NA	NA
Nr1h2-ps	chr9	74364586	74365063	-	2	0.966184	0.00761641	0.0422123	0 [0,0]	2 [0,2]	1	ID=B16_474-3,ID=B16_449-3	NA	NA
Tmem158	chr9	123259053	123260764	-	2	0.966184	0.00761641	0.0422123	0 [0,0]	2 [0,2]	1	ID=B16_498-1,ID=B16_475-2	NA	NA
Tcaim	chr9	122805539	122836334	+	8	3.86473	0.00763479	0.0422879	8 [5,3]	0 [0,0]	1	ID=B16_488-3,ID=B16_101NT-3,ID=B16_474-3,ID=B16_450-3,ID=B16_499-1,ID=B16_499-2,ID=B16_491-3,ID=B16_491-2	NA	NA
Lgsn	chr1	31176401	31204725	+	8	3.86473	0.00766435	0.0424253	8 [3,5]	0 [0,0]	1	ID=B16_463-1,ID=B16_488-3,ID=B16_464-1,ID=B16_498-1,ID=B16_460-1,ID=EL4_45-1,ID=EL4PD1_150-2,ID=B16_499-1	NA	NA
Atg4c	chr4	99193934	99259787	+	13	6.28019	0.00769927	0.0425921	13 [5,8]	0 [1,-1]	1	ID=B16_464-2,ID=B16_464-1,ID=B16_485-1,ID=B16_502-3,ID=B16_460-1,ID=B16_474-3,ID=B16_474-4,ID=B16_486-3,ID=EL4_64-1,ID=B16_489-1,ID=B16_462-4,ID=EL4_47-1,ID=B16_499-2	NA	NA
Shc3	chr13	51431041	51567084	-	2	0.966184	0.00772264	0.0426949	2 [1,1]	0 [0,0]	1	ID=EL4_26_4,ID=B16_474-1	NA	NA
Ntn1	chr11	68209364	68400823	-	3	1.44928	0.00775974	0.0428734	2 [1,1]	1 [1,0]	1	ID=B16_463-1,ID=B16_498-1,ID=B16_474-4	NA	NA
Lypd6	chr2	50066429	50193569	+	2	0.966184	0.00777145	0.0428865	2 [0,2]	0 [0,0]	1	ID=B16_485-1,ID=EL4_64-1	NA	NA
Irak1bp1	chr9	82829540	82847687	+	6	2.89855	0.00778577	0.0429108	2 [2,0]	4 [0,4]	1	ID=B16_464-2,ID=EL4_45-1,ID=B16_449-3,ID=B16_518-1,ID=B16_461-1,ID=B16_462-3	NA	NA
Faim	chr9	98986373	99002021	+	5	2.41546	0.00780256	0.0429524	4 [4,0]	1 [0,1]	1	ID=B16_487-4,ID=B16_498-2,ID=B16_489-1,ID=B16_499-1,ID=B16_484-4	NA	NA
Ralgapa2	chr2	146239879	146512004	-	12	5.7971	0.00791143	0.0435226	12 [6,6]	0 [0,0]	1	ID=B16_463-1,ID=B16_464-2,ID=B16_464-1,ID=LLC_168-1,ID=B16_502-3,ID=B16_474-4,ID=B16_486-3,ID=EL4PD1_115-3,ID=EL4_55-2,ID=B16_499-1,ID=B16PD1_163-2,ID=EL4PD1_118-1	NA	NA
Plaa	chr4	94569167	94603244	-	9	4.34783	0.00791635	0.0435229	9 [4,5]	0 [0,0]	1	ID=B16_488-3,ID=B16_464-2,ID=B16_485-1,ID=EL4_49-1,ID=B16_474-3,ID=B16_450-3,ID=B16_499-1,ID=B16_484-2,ID=B16_499-2	NA	NA
Gad2	chr2	22622205	22693874	+	13	6.28019	0.0079253	0.0435452	10 [10,0]	3 [0,3]	0.999356	ID=EL4_28_4,ID=B16_488-3,ID=B16_101NT-3,ID=B16_485-1,ID=B16_487-4,ID=B16_497-1,ID=B16_450-3,ID=B16_13-3,ID=B16_499-1,ID=B16_13-1,ID=B16_475-1,ID=B16_484-2,ID=B16_499-2	NA	NA
Eml5	chr12	98786805	98901172	-	3	1.44928	0.00793569	0.0435485	3 [2,1]	0 [0,0]	1	ID=B16_460-1,ID=B16_450-3,ID=EL4_65-1	NA	NA
Map7	chr10	20148471	20281522	+	2	0.966184	0.00793221	0.0435485	2 [0,2]	0 [0,0]	1	ID=B16_485-4,ID=EL4_36_3	NA	NA
Cps1	chr1	67123026	67231259	+	20	9.66184	0.00796561	0.0436859	20 [11,9]	0 [0,0]	1	ID=B16_463-1,ID=B16_488-3,ID=B16_464-1,ID=EL4PD1_156-2,ID=EL4PD1_116-3,ID=B16_487-4,ID=B16_498-2,ID=B16_498-1,ID=LLC_168-1,ID=EL4_45-1,ID=B16_497-2,ID=B16_486-3,ID=EL4PD1_115-2,ID=EL4_67-2,ID=EL4_38_3,ID=B16_499-1,ID=B16_451-5,ID=B16_484-1,ID=B16_499-2,ID=B16_491-3	NA	NA
Kynu	chr2	43555329	43682715	+	4	1.93237	0.00798247	0.0437514	4 [2,2]	0 [0,0]	1	ID=B16_488-3,ID=B16_462-4,ID=B16_474-1,ID=B16_474-2	NA	NA
Cep126	chr9	8076461	8134294	-	13	6.28019	0.0080018	0.0438304	12 [7,5]	1 [1,0]	1	ID=B16_464-2,ID=B16_485-1,ID=B16_474-3,ID=B16_497-1,ID=B16_485-4,ID=EL4PD1_154-1,ID=EL4_64-1,ID=B16_451-3,ID=B16_462-4,ID=EL4PD1_152-2,ID=B16_484-1,ID=B16_499-2,ID=B16_491-3	NA	NA
Nipsnap3a	chr4	52989418	53001162	+	5	2.41546	0.00805494	0.0440944	4 [3,1]	1 [1,0]	1	ID=B16_463-1,ID=B16_464-2,ID=B16_464-1,ID=B16_502-3,ID=B16_484-4	NA	NA
Olfr418	chr1	173266001	173273994	+	4	1.93237	0.00809031	0.0442608	3 [0,3]	1 [1,0]	1	ID=B16_463-1,ID=B16_464-1,ID=EL4_64-5,ID=B16_451-3	NA	NA
Mef2a	chr7	67231163	67372858	-	5	2.41546	0.00809538	0.0442613	5 [3,2]	0 [0,0]	1	ID=B16_463-1,ID=B16_487-2,ID=B16_474-4,ID=B16_485-4,ID=B16_499-2	NA	NA
Rnf111	chr9	70425429	70503725	-	15	7.24638	0.00813152	0.0444091	15 [7,8]	0 [0,0]	1	ID=EL4_41-1,ID=B16_463-1,ID=B16_464-2,ID=B16_464-1,ID=B16_502-3,ID=EL4_49-1,ID=B16_460-1,ID=EL4_45-1,ID=B16_474-4,ID=EL4_64-1,ID=EL4_43-2,ID=B16_489-1,ID=EL4_70-3,ID=B16_499-1,ID=B16PD1_160-3	NA	NA
Plce1	chr19	38481121	38783430	+	12	5.7971	0.00813236	0.0444091	11 [5,6]	1 [1,0]	1	ID=EL4PD1_116-2,ID=B16_463-1,ID=B16_464-1,ID=B16_502-3,ID=B16_474-3,ID=B16_497-1,ID=B16_485-4,ID=B16_450-3,ID=B16_499-1,ID=EL4_62-1,ID=EL4_61-2,ID=B16_491-2	NA	NA
Serpinb11	chr1	107361929	107380475	+	6	2.89855	0.00815768	0.04452	6 [4,2]	0 [0,0]	1	ID=B16_464-1,ID=B16_498-2,ID=B16_498-1,ID=EL4_67-2,ID=B16_499-1,ID=B16_462-4	NA	NA
Bri3	chr5	144255225	144446757	+	4	1.93237	0.00819096	0.0446743	4 [3,1]	0 [0,0]	1	ID=B16_464-1,ID=B16_474-4,ID=B16_499-1,ID=B16_484-4	NA	NA
Slc8a3	chr12	81197915	81333164	-	2	0.966184	0.00820536	0.0447255	2 [0,2]	0 [0,0]	1	ID=B16_464-2,ID=B16_489-1	NA	NA
Itga8	chr2	12106632	12301922	-	7	3.38164	0.00823821	0.0448771	7 [4,3]	0 [0,0]	1	ID=B16_488-3,ID=B16_464-2,ID=B16_464-1,ID=B16_502-3,ID=B16_497-1,ID=B16_489-1,ID=B16_499-1	NA	NA
Mup4	chr4	59956804	59960710	-	3	1.44928	0.00827814	0.0450121	2 [1,1]	1 [0,1]	1	ID=B16_474-4,ID=B16_484-4,ID=B16_491-3	NA	NA
Wdr49	chr3	75274988	75481740	-	9	4.34783	0.00831373	0.045123	6 [5,1]	3 [2,1]	0.999235	ID=B16_463-1,ID=B16_487-4,ID=B16_498-1,ID=B16_519-3,ID=B16_502-3,ID=B16_474-4,ID=B16_486-3,ID=EL4_36_3,ID=B16_2-2	NA	NA
Slc28a2	chr2	122426477	122461137	+	8	3.86473	0.00830554	0.045123	7 [3,4]	1 [0,1]	1	ID=EL4_28_4,ID=B16_485-3,ID=EL4_18_2,ID=EL4_33_2,ID=EL4_67-2,ID=EL4_24_1,ID=EL4_65-1,ID=B16_484-1	NA	NA
Ppfibp1	chr6	146888487	147032025	+	3	1.44928	0.0083123	0.045123	3 [0,3]	0 [0,0]	1	ID=B16_487-2,ID=B16_460-1,ID=B16_474-4	NA	NA
Cxadr	chr16	78301756	78359785	+	11	5.31401	0.0083503	0.0452939	11 [8,3]	0 [0,0]	1	ID=B16_463-1,ID=B16_3-4,ID=EL4_60-2,ID=B16_498-1,ID=B16_16-3,ID=B16_16-2,ID=B16_16-1,ID=B16_474-4,ID=B16_16-4,ID=B16_2-2,ID=B16_453-2	NA	NA
Disc1	chr8	125054195	125261858	+	4	1.93237	0.00836666	0.0453551	4 [2,2]	0 [0,0]	1	ID=B16_463-1,ID=B16_464-2,ID=B16_498-2,ID=B16_491-3	NA	NA
Mipol1	chr12	57230446	57497199	+	15	7.24638	0.00842353	0.0456283	15 [10,5]	0 [0,0]	1	ID=B16_463-1,ID=B16_488-3,ID=B16_464-2,ID=B16_464-1,ID=EL4_60-1,ID=B16_485-1,ID=B16_487-2,ID=B16_450-1,ID=B16_502-3,ID=B16_485-4,ID=B16_450-3,ID=B16_451-5,ID=B16_462-4,ID=B16_474-1,ID=B16_491-3	NA	NA
Apba1	chr19	23758876	23949597	+	5	2.41546	0.00842731	0.0456283	5 [2,3]	0 [0,0]	1	ID=B16_463-1,ID=B16_464-2,ID=B16_464-1,ID=B16_489-1,ID=EL4_65-1	NA	NA
Nradd	chr9	110621135	110624452	-	2	0.966184	0.00843936	0.0456658	1 [0,1]	1 [1,0]	1	ID=EL4_36_3,ID=B16_491-3	NA	NA
D10Wsu102e	chr10	83360221	83488505	+	2	0.966184	0.00845451	0.04572	2 [1,1]	0 [0,0]	1	ID=B16_474-4,ID=B16_491-3	NA	NA
Pcdha9	chr18	36997880	37187657	+	7	3.38164	0.00846636	0.0457405	7 [2,5]	0 [0,0]	1	ID=B16_463-1,ID=B16_464-1,ID=B16_450-1,ID=B16_489-1,ID=B16_451-5,ID=B16PD1_163-3,ID=B16_484-1	NA	NA
Penk	chr4	4133531	4138477	-	3	1.44928	0.0084737	0.0457405	1 [1,0]	2 [1,1]	1	ID=EL4_28_2,ID=B16_485-1,ID=B16_474-3	NA	NA
Prkaa2	chr4	105029874	105109890	-	15	7.24638	0.00851533	0.0459374	15 [8,7]	0 [0,0]	1	ID=B16_488-3,ID=B16_464-2,ID=B16_498-2,ID=B16_452-1,ID=B16_460-1,ID=B16_474-3,ID=B16_474-4,ID=B16_489-1,ID=B16_450-3,ID=B16_13-3,ID=B16_451-5,ID=B16_462-4,ID=EL4_62-1,ID=B16_499-2,ID=B16_491-2	NA	NA
Gpm6b	chrX	166238911	166388988	+	4	1.93237	0.00853311	0.0459864	4 [1,3]	0 [0,0]	1	ID=B16_502-3,ID=B16_485-2,ID=B16_462-4,ID=EL4_47-2	NA	NA
Stk32a	chr18	43207697	43317481	+	2	0.966184	0.00853473	0.0459864	2 [1,1]	0 [0,0]	1	ID=B16_488-3,ID=B16_489-1	NA	NA
Ppp1r9a	chr6	4903320	5165661	+	11	5.31401	0.0085549	0.0460672	10 [3,7]	1 [0,1]	1	ID=B16_463-1,ID=B16PD1_534_2,ID=B16_488-3,ID=B16_485-1,ID=EL4_18_2,ID=EL4_45-1,ID=B16_474-4,ID=B16_489-1,ID=B16_451-3,ID=B16_499-2,ID=B16_515-1	NA	NA
Klhl36	chr8	119862272	119876995	+	4	1.93237	0.00856618	0.0461001	3 [1,2]	1 [0,1]	1	ID=EL4_67-3,ID=B16_462-4,ID=LLC_170-1,ID=B16_499-2	NA	NA
Zfp609	chr9	65692391	65827564	-	3	1.44928	0.00860627	0.04626	3 [0,3]	0 [0,0]	1	ID=B16_464-2,ID=B16_474-4,ID=B16_489-1	NA	NA
Fbxw15	chr9	109552602	109568262	-	5	2.41546	0.00863116	0.0463658	5 [2,3]	0 [0,0]	1	ID=B16_464-2,ID=B16_460-1,ID=B16_474-4,ID=B16_489-1,ID=B16_474-1	NA	NA
Flt1	chr5	147561604	147726011	-	3	1.44928	0.00863956	0.046383	3 [1,2]	0 [0,0]	1	ID=B16_101NT-3,ID=EL4_45-1,ID=B16_499-2	NA	NA
Wnk3	chrX	151198140	151318309	+	4	1.93237	0.00865024	0.0464124	4 [2,2]	0 [0,0]	1	ID=B16_485-1,ID=B16_497-1,ID=B16_462-4,ID=B16_491-3	NA	NA
Kif13a	chr13	46749087	46929718	-	4	1.93237	0.00866992	0.046462	4 [3,1]	0 [0,0]	1	ID=B16PD1_534_1,ID=B16_464-1,ID=B16_498-1,ID=B16_450-3	NA	NA
Zfat	chr15	68083766	68258856	-	4	1.93237	0.00866992	0.046462	4 [3,1]	0 [0,0]	1	ID=B16_487-4,ID=B16_474-4,ID=EL4_65-1,ID=B16_484-1	NA	NA
Man2a1	chr17	64600736	64755110	+	4	1.93237	0.00868306	0.0465045	4 [3,1]	0 [0,0]	1	ID=B16_464-1,ID=B16_474-4,ID=B16_450-3,ID=B16_499-2	NA	NA
Pcdha6	chr18	36967631	37187657	+	9	4.34783	0.00870499	0.0465939	9 [2,7]	0 [0,0]	1	ID=B16_463-1,ID=B16_464-2,ID=B16_464-1,ID=B16_450-1,ID=B16_489-1,ID=B16_451-5,ID=B16_462-4,ID=B16PD1_163-3,ID=B16_484-1	NA	NA
Hdx	chrX	111569931	111697079	-	5	2.41546	0.00872049	0.0466489	5 [0,5]	0 [0,0]	1	ID=EL4_52-5,ID=B16_489-1,ID=B16_449-4,ID=B16_451-3,ID=B16_484-1	NA	NA
Arpc5	chr1	152766542	152775597	+	4	1.93237	0.0087761	0.046862	4 [1,3]	0 [0,0]	1	ID=B16_487-4,ID=B16_498-1,ID=B16_474-3,ID=B16_516-2	NA	NA
Tysnd1	chr10	61695514	61702773	+	3	1.44928	0.00877298	0.046862	3 [0,3]	0 [0,0]	1	ID=EL4_28_1,ID=EL4_28_2,ID=EL4_26_4	NA	NA
Srsf9	chr5	115327177	115333080	+	3	1.44928	0.00877298	0.046862	2 [2,0]	1 [0,1]	0.750858	ID=B16_455-2,ID=B16_456-4,ID=EL4PD1_150-2	NA	NA
Hsd17b12	chr2	94032689	94157964	-	3	1.44928	0.00878754	0.0468669	3 [1,2]	0 [0,0]	1	ID=B16_498-1,ID=B16_517-1,ID=B16_489-1	NA	NA
Olfr1375	chr11	51048109	51049050	+	2	0.966184	0.00878429	0.0468669	1 [1,0]	1 [0,1]	1	ID=B16_464-1,ID=B16_487-2	NA	NA
Mmp1a	chr9	7464141	7476869	+	5	2.41546	0.00890278	0.0474248	4 [3,1]	1 [0,1]	1	ID=B16_464-2,ID=B16_487-2,ID=B16_460-1,ID=B16_451-3,ID=B16_491-2	NA	NA
Cdh11	chr8	102632095	102785642	-	5	2.41546	0.00892364	0.0475075	5 [2,3]	0 [0,0]	1	ID=B16_464-2,ID=B16_474-3,ID=B16_474-4,ID=EL4_67-4,ID=EL4_62-1	NA	NA
Rnf150	chr8	82863356	83091268	+	8	3.86473	0.00893304	0.0475291	8 [4,4]	0 [0,0]	1	ID=EL4PD1_116-2,ID=B16_463-1,ID=B16_464-2,ID=B16_487-4,ID=B16_485-2,ID=B16_474-4,ID=EL4PD1_115-3,ID=B16_1-2	NA	NA
Iqcj	chr3	67892220	68056593	+	5	2.41546	0.00895019	0.0475599	5 [3,2]	0 [0,0]	1	ID=B16_464-1,ID=EL4_18_2,ID=B16_460-1,ID=B16_474-3,ID=B16_489-1	NA	NA
Phf8	chrX	151520672	151633857	+	3	1.44928	0.00895183	0.0475599	3 [1,2]	0 [0,0]	1	ID=B16_502-3,ID=B16_474-3,ID=B16_485-4	NA	NA
AC160403.2	chr10	39662089	39663420	+	2	0.966184	0.00896018	0.0475599	0 [0,0]	2 [2,0]	1	ID=B16_463-1,ID=B16_485-2	NA	NA
Kdm4dl	chr9	14450836	14452022	-	2	0.966184	0.00896018	0.0475599	0 [0,0]	2 [1,1]	1	ID=B16_474-4,ID=B16_462-4	NA	NA
Olfr904	chr9	38463144	38468995	+	4	1.93237	0.00906167	0.0480128	3 [2,1]	1 [0,1]	1	ID=B16_488-3,ID=B16_464-2,ID=B16_462-4,ID=B16_499-2	NA	NA
Panx3	chr9	37659902	37669235	-	4	1.93237	0.00906167	0.0480128	2 [1,1]	2 [0,2]	1	ID=B16_460-1,ID=B16_474-4,ID=B16_462-4,ID=B16_499-2	NA	NA
Prdx6	chr1	161240112	161251219	-	4	1.93237	0.00906167	0.0480128	4 [0,4]	0 [0,0]	1	ID=EL4_63-1,ID=EL4_60-1,ID=EL4_49-1,ID=B16_499-1	NA	NA
Pde8b	chr13	95024454	95250336	-	7	3.38164	0.00908323	0.0480414	7 [5,2]	0 [0,0]	1	ID=B16_464-1,ID=B16_487-4,ID=EL4PD1_150-2,ID=B16_489-1,ID=B16_451-3,ID=B16_462-4,ID=B16_484-1	NA	NA
Pja1	chrX	99465734	99471273	-	3	1.44928	0.00907947	0.0480414	0 [0,0]	3 [3,0]	1	ID=EL4_60-2,ID=B16_474-5,ID=EL4_43-2	NA	NA
Adamts6	chr13	104287873	104494763	+	11	5.31401	0.00911078	0.0481585	11 [4,7]	0 [0,0]	1	ID=B16_464-1,ID=B16_485-1,ID=B16_502-3,ID=B16_474-4,ID=B16_485-4,ID=B16_499-1,ID=B16_451-3,ID=B16_462-4,ID=LLC_174-2,ID=EL4_62-1,ID=B16_491-3	NA	NA
Lgr5	chr10	115450311	115587780	-	3	1.44928	0.00911915	0.0481742	3 [0,3]	0 [0,0]	1	ID=B16_487-4,ID=B16_474-4,ID=B16_484-4	NA	NA
Stag2	chrX	42149317	42277185	+	5	2.41546	0.00924733	0.0487646	5 [2,3]	0 [0,0]	1	ID=B16_463-1,ID=B16_474-3,ID=B16_450-3,ID=B16_499-1,ID=B16_474-2	NA	NA
Brwd3	chrX	108737016	108834348	-	3	1.44928	0.00925379	0.0487698	3 [1,2]	0 [0,0]	1	ID=B16_464-1,ID=B16_474-3,ID=B16_451-3	NA	NA
Olfr1146-ps1	chr2	87816534	87817476	+	3	1.44928	0.00928783	0.0488914	0 [0,0]	3 [3,0]	1	ID=B16_464-2,ID=B16_519-1,ID=B16_449-4	NA	NA
Pop5	chr5	115238032	115245351	+	3	1.44928	0.00928783	0.0488914	0 [0,0]	3 [2,1]	1	ID=B16_463-1,ID=B16_498-2,ID=EL4_52-5	NA	NA
Ythdf2	chr4	132184912	132212303	-	7	3.38164	0.00933228	0.0490964	7 [4,3]	0 [0,0]	1	ID=B16_464-2,ID=B16_450-1,ID=B16_502-3,ID=B16_474-4,ID=EL4_59-1,ID=LLC_174-1,ID=B16_491-3	NA	NA
Ybx1	chr4	119277981	119294604	-	5	2.41546	0.00946463	0.0497047	5 [0,5]	0 [0,0]	1	ID=B16_488-3,ID=B16_485-3,ID=EL4PD1_114-3,ID=B16_474-3,ID=B16_462-4	NA	NA
Zbbx	chr3	75037907	75143772	-	3	1.44928	0.00946307	0.0497047	3 [2,1]	0 [0,0]	1	ID=B16_502-3,ID=B16_474-3,ID=B16_462-4	NA	NA
Svep1	chr4	58042442	58206596	-	23	11.1111	0.00950033	0.0497815	23 [9,14]	0 [1,-1]	1	ID=EL4_63-1,ID=B16_464-2,ID=B16_464-1,ID=B16_485-1,ID=B16_450-1,ID=B16_502-3,ID=B16_460-1,ID=B16_474-3,ID=B16_474-4,ID=B16_474-5,ID=EL4PD1_150-2,ID=EL4_64-1,ID=B16_489-1,ID=B16_449-3,ID=B16_451-3,ID=B16_475-1,ID=B16_462-4,ID=LLC_174-1,ID=EL4_62-1,ID=B16_484-4,ID=B16_484-2,ID=B16_499-2,ID=B16_491-3	NA	NA
G0s2	chr1	193272161	193273217	-	2	0.966184	0.00950161	0.0497815	0 [0,0]	2 [0,2]	1	ID=B16_485-1,ID=B16_486-3	NA	NA
Gpc4	chrX	52053021	52165252	-	2	0.966184	0.00949855	0.0497815	2 [0,2]	0 [0,0]	1	ID=B16_474-3,ID=B16_451-5	NA	NA
Med27	chr2	29346819	29524793	+	3	1.44928	0.0095584	0.0500496	3 [2,1]	0 [0,0]	1	ID=B16_485-3,ID=B16_499-1,ID=EL4_65-1	NA	NA
Myom3	chr4	135759715	135815564	+	8	3.86473	0.00956903	0.0500759	7 [5,2]	1 [1,0]	1	ID=EL4_28_2,ID=B16_460-1,ID=EL4_32_1,ID=EL4_27_3,ID=EL4_33_2,ID=EL4_32_2,ID=EL4_24_1,ID=B16_462-4	NA	NA
Tbl1x	chrX	77511013	77662983	+	23	11.1111	0.00961002	0.0502608	23 [18,5]	0 [0,0]	0.926363	ID=B16_468-4,ID=B16_455-2,ID=B16_455-1,ID=B16_485-1,ID=B16_498-1,ID=B16_502-1,ID=B16_452-1,ID=B16_460-1,ID=B16_474-3,ID=EL4PD1_157-3,ID=B16_521-1,ID=B16_449-3,ID=B16_522-1,ID=B16_499-1,ID=B16_518-1,ID=B16_461-1,ID=B16_475-1,ID=B16_462-3,ID=B16_462-4,ID=B16_469-1,ID=B16_474-1,ID=B16_451-4,ID=B16_516-2	NA	NA
9230110F15Rik	chr9	35838329	35844150	-	4	1.93237	0.0096525	0.0504534	2 [1,1]	2 [1,1]	1	ID=B16PD1_537_4,ID=B16_474-3,ID=B16_489-1,ID=B16_475-2	NA	NA
Msi2	chr11	88339382	88718229	-	12	5.7971	0.0097403	0.0508527	12 [7,5]	0 [0,0]	0.999833	ID=EL4_28_4,ID=EL4_28_1,ID=EL4_26_4,ID=EL4_18_2,ID=B16_502-3,ID=B16PD1_537_1,ID=B16_474-3,ID=B16_525-2,ID=B16_489-1,ID=B16_462-4,ID=B16_474-1,ID=B16_520-1	NA	NA
Atp2b2	chr6	113743831	114042026	-	7	3.38164	0.00975727	0.0509115	7 [6,1]	0 [0,0]	1	ID=B16_488-3,ID=B16_464-2,ID=B16_502-3,ID=B16_485-2,ID=B16_499-1,ID=B16_499-2,ID=B16_520-1	NA	NA
Errfi1	chr4	150853919	150868892	+	5	2.41546	0.0099323	0.0517655	4 [0,4]	1 [0,1]	1	ID=EL4_55-2,ID=EL4PD1_113-1,ID=EL4_67-4,ID=B16_484-2,ID=EL4PD1_118-3	NA	NA
Tspan9	chr6	127961396	128143563	-	2	0.966184	0.0099496	0.051824	2 [2,0]	0 [0,0]	1	ID=EL4_36_2,ID=B16_489-1	NA	NA
Ccdc148	chr2	58821697	59160683	-	12	5.7971	0.0100227	0.0521742	12 [5,7]	0 [0,0]	0.934403	ID=B16_468-4,ID=B16PD1_534_3,ID=EL4_28_2,ID=B16_464-2,ID=EL4_68-1,ID=B16_498-2,ID=B16_502-1,ID=EL4_32_3,ID=EL4_34_5,ID=B16PD1_532_2,ID=EL4_36_3,ID=B16_518-2	NA	NA
Fgf10	chr13	118669791	118789334	+	4	1.93237	0.0100928	0.0525086	4 [1,3]	0 [0,0]	1	ID=B16_502-3,ID=EL4_38_3,ID=EL4_24_1,ID=B16_451-5	NA	NA
Rap1gds1	chr3	138925902	139075201	-	5	2.41546	0.0101148	0.0525617	5 [2,3]	0 [0,0]	1	ID=B16_488-3,ID=B16_464-2,ID=B16_485-3,ID=B16_485-4,ID=B16_450-3	NA	NA
Olfr959	chr9	39569383	39575569	-	4	1.93237	0.0101132	0.0525617	3 [0,3]	1 [1,0]	0.838462	ID=B16_460-1,ID=B16_474-3,ID=B16_474-5,ID=B16_484-2	NA	NA
Mycbp2	chr14	103113411	103346800	-	13	6.28019	0.0101297	0.0526085	13 [7,6]	0 [0,0]	1	ID=B16_464-1,ID=B16_460-1,ID=B16_16-3,ID=B16_474-3,ID=B16_474-4,ID=EL4_67-2,ID=EL4PD1_157-1,ID=B16_489-1,ID=B16_450-3,ID=B16_499-1,ID=B16_462-4,ID=B16_499-2,ID=B16_491-3	NA	NA
2310035C23Rik	chr1	105663913	105755191	+	19	9.17874	0.0101498	0.0526279	19 [13,6]	0 [0,0]	0.97473	ID=EL4_41-1,ID=B16_463-1,ID=B16_455-2,ID=B16_488-3,ID=B16_101NT-3,ID=B16_464-1,ID=B16_456-4,ID=B16_487-4,ID=B16_450-1,ID=B16_498-1,ID=EL4_70-1,ID=EL4PD1_115-2,ID=EL4_55-2,ID=B16_525-1,ID=EL4_67-2,ID=B16_499-1,ID=B16_484-1,ID=B16_499-2,ID=LLC_167-1	NA	NA
Arid1b	chr17	4995074	5347656	+	13	6.28019	0.010163	0.0526279	13 [3,10]	0 [0,0]	1	ID=EL4_28_3,ID=B16_464-1,ID=B16_485-1,ID=B16_487-4,ID=B16_485-3,ID=EL4PD1_114-3,ID=EL4_32_1,ID=EL4_19_2,ID=EL4_32_3,ID=EL4_55-2,ID=B16_489-1,ID=B16_462-4,ID=B16_491-3	NA	human T-ALL driver
Tbc1d1	chr5	64159451	64351486	+	5	2.41546	0.0101598	0.0526279	5 [3,2]	0 [0,0]	1	ID=B16_498-2,ID=B16_485-2,ID=B16_474-3,ID=B16_484-2,ID=LLC_167-1	NA	NA
Miip	chr4	147860786	147868816	-	3	1.44928	0.0101541	0.0526279	3 [2,1]	0 [0,0]	1	ID=B16_464-2,ID=B16_449-4,ID=B16_499-1	NA	NA
Ppef1	chrX	160623094	160719972	-	2	0.966184	0.0101471	0.0526279	1 [0,1]	1 [0,1]	1	ID=B16_502-3,ID=B16_450-3	NA	NA
Kif4	chrX	100625737	100727214	+	2	0.966184	0.010179	0.0526498	2 [1,1]	0 [0,0]	1	ID=B16_485-3,ID=B16_498-1	NA	NA
Olfr905	chr9	38471107	38477013	+	4	1.93237	0.0101914	0.0526832	3 [0,3]	1 [1,0]	1	ID=B16_464-2,ID=B16_498-1,ID=B16_474-4,ID=B16_462-4	NA	NA
Obox4-ps7	chr7	14947537	14948041	-	2	0.966184	0.0102561	0.0529868	0 [0,0]	2 [2,0]	1	ID=EL4_28_1,ID=EL4_38_3	NA	NA
Fam71b	chr11	46396559	46406615	+	4	1.93237	0.0102701	0.0529977	1 [1,0]	3 [0,3]	1	ID=B16_488-3,ID=B16_464-2,ID=EL4PD1_104-1,ID=EL4_67-3	NA	NA
Mup-ps19	chr4	61957149	61959911	-	3	1.44928	0.0102661	0.0529977	1 [0,1]	2 [2,0]	1	ID=B16_488-3,ID=B16_487-4,ID=B16_475-2	NA	NA
Nr6a1	chr2	38723370	38927688	-	9	4.34783	0.0103816	0.0535421	9 [1,8]	0 [0,0]	1	ID=B16_463-1,ID=EL4PD1_156-2,ID=B16_485-3,ID=EL4_55-2,ID=EL4_64-2,ID=EL4_43-2,ID=EL4PD1_118-2,ID=EL4PD1_117-1,ID=EL4_54-2	NA	NA
Zfyve9	chr4	108637466	108780798	-	23	11.1111	0.0103925	0.0535535	23 [10,13]	0 [0,0]	0.999377	ID=B16_463-1,ID=B16_488-3,ID=B16_464-2,ID=B16_487-4,ID=B16_485-3,ID=B16_450-1,ID=EL4_18_2,ID=B16_502-3,ID=B16_460-1,ID=B16_485-2,ID=B16_474-3,ID=B16_474-4,ID=B16_474-5,ID=B16_497-2,ID=EL4_32_2,ID=EL4_38_3,ID=B16_450-3,ID=B16_499-1,ID=B16_451-3,ID=B16_462-4,ID=B16_474-1,ID=B16_451-4,ID=B16_499-2	NA	NA
Taf3	chr2	9914552	10048596	-	3	1.44928	0.0103958	0.0535535	3 [2,1]	0 [0,0]	0.997793	ID=B16_463-1,ID=B16_474-5,ID=B16_450-3	NA	NA
Spidr	chr16	15889227	16146851	-	12	5.7971	0.0104435	0.0537682	12 [8,4]	0 [0,0]	1	ID=B16_463-1,ID=B16_464-2,ID=EL4_45-1,ID=B16_474-4,ID=B16_525-1,ID=B16_485-4,ID=B16_489-1,ID=B16_450-3,ID=B16_499-1,ID=B16_451-3,ID=EL4_62-1,ID=B16_484-2	NA	NA
Zcchc2	chr1	105990406	106034074	+	9	4.34783	0.0104769	0.0539088	9 [1,8]	0 [0,0]	0.887929	ID=B16PD1_534_3,ID=B16PD1_534_2,ID=B16_101NT-3,ID=B16_464-1,ID=B16_454-3,ID=EL4_36_3,ID=B16_489-1,ID=B16_499-1,ID=B16_453-2	NA	NA
Pparg	chr6	115360951	115490399	+	4	1.93237	0.0104967	0.0539795	4 [3,1]	0 [0,0]	1	ID=B16_498-1,ID=B16_485-2,ID=B16_489-1,ID=B16_475-2	NA	NA
Myo3a	chr2	22227503	22618252	+	14	6.76329	0.0105154	0.0540446	14 [7,7]	0 [0,0]	1	ID=EL4_28_4,ID=B16_485-1,ID=EL4_18_2,ID=B16_460-1,ID=B16_474-4,ID=EL4PD1_115-3,ID=B16_485-4,ID=EL4_36_2,ID=EL4_38_3,ID=B16_450-3,ID=B16_475-1,ID=B16_462-4,ID=B16_484-1,ID=B16_499-2	NA	NA
Pcdha12	chr18	37020149	37187657	+	6	2.89855	0.0105426	0.0541534	6 [1,5]	0 [0,0]	1	ID=B16_464-1,ID=B16_450-1,ID=B16_489-1,ID=B16_451-5,ID=B16PD1_163-3,ID=B16_484-1	NA	NA
Nrcam	chr12	44328886	44600760	+	13	6.28019	0.0105496	0.0541577	13 [5,8]	0 [0,0]	1	ID=B16_488-3,ID=B16_464-1,ID=B16_487-4,ID=EL4PD1_114-3,ID=B16_498-1,ID=B16_474-3,ID=B16_497-2,ID=EL4_67-2,ID=B16_454-3,ID=B16_462-4,ID=EL4_62-1,ID=B16_474-1,ID=B16_515-1	NA	NA
Abcb7	chrX	104280657	104413846	-	5	2.41546	0.0105582	0.054171	5 [2,3]	0 [0,0]	1	ID=B16_498-1,ID=B16_502-3,ID=B16_485-4,ID=B16_462-4,ID=B16_491-3	NA	NA
Umad1	chr6	8259288	8459470	+	9	4.34783	0.0106062	0.0543858	9 [3,6]	0 [0,0]	1	ID=B16_463-1,ID=B16_464-1,ID=EL4_49-1,ID=EL4_46-2,ID=EL4_36_2,ID=B16_489-1,ID=B16_499-1,ID=EL4_62-1,ID=B16_491-2	NA	NA
Birc2	chr9	7818227	7837057	-	6	2.89855	0.0106218	0.0544347	5 [2,3]	1 [1,0]	1	ID=B16_463-1,ID=B16_464-1,ID=B16_474-3,ID=B16_450-3,ID=EL4_62-1,ID=B16_499-2	NA	NA
2810006K23Rik	chr5	124328098	124341844	+	4	1.93237	0.0107512	0.0549577	3 [0,3]	1 [1,0]	1	ID=B16_488-3,ID=B16_464-1,ID=B16_502-3,ID=B16_499-1	NA	NA
Hook3	chr8	26021421	26119224	-	2	0.966184	0.0107547	0.0549577	2 [0,2]	0 [0,0]	1	ID=B16_474-4,ID=EL4PD1_150-2	NA	NA
Ipcef1	chr10	6911543	7052478	-	4	1.93237	0.0107612	0.0549589	4 [3,1]	0 [0,0]	1	ID=B16_463-1,ID=B16_489-1,ID=B16_450-3,ID=LLC_170-1	NA	NA
Pcdha11	chr18	37005203	37187657	+	7	3.38164	0.0107901	0.0550752	6 [1,5]	1 [1,0]	1	ID=B16_463-1,ID=B16_464-1,ID=B16_450-1,ID=B16_489-1,ID=B16_451-5,ID=B16PD1_163-3,ID=B16_484-1	NA	NA
Fer	chr17	63896018	64139494	+	12	5.7971	0.0108022	0.0551054	12 [6,6]	0 [0,0]	1	ID=B16_463-1,ID=B16_464-1,ID=B16_485-3,ID=B16_498-1,ID=B16_502-3,ID=B16_486-3,ID=EL4_55-2,ID=EL4_25_3,ID=B16_450-3,ID=B16_462-4,ID=EL4_54-4,ID=B16_491-3	NA	NA
Myl6	chr10	128490997	128494051	-	2	0.966184	0.0108467	0.055269	0 [0,0]	2 [2,0]	1	ID=B16_485-1,ID=B16_485-4	NA	NA
Ppp1cb	chr5	32459152	32517433	+	12	5.7971	0.0108762	0.0553881	12 [8,4]	0 [0,0]	1	ID=EL4_28_2,ID=B16_464-2,ID=B16_464-1,ID=EL4_60-1,ID=B16_502-3,ID=B16_502-1,ID=B16_460-1,ID=B16_497-1,ID=B16_499-1,ID=B16_451-3,ID=B16_474-1,ID=B16_499-2	NA	NA
3632451O06Rik	chr14	49681560	49783383	-	2	0.966184	0.0108994	0.0554741	2 [1,1]	0 [0,0]	1	ID=B16_463-1,ID=EL4_22_3	NA	NA
Dab1	chr4	103619665	104680382	+	70	33.8164	0.0109427	0.055663	70 [36,34]	0 [0,0]	0.991539	ID=EL4PD1_116-2,ID=EL4_41-1,ID=B16_463-1,ID=B16PD1_534_1,ID=EL4_28_3,ID=B16_488-3,ID=EL4_63-1,ID=B16_464-2,ID=B16_464-1,ID=B16_485-1,ID=B16_485-3,ID=B16_487-2,ID=EL4PD1_114-3,ID=B16_450-1,ID=B16_498-2,ID=B16_498-1,ID=LLC_172-2,ID=EL4PD1_149-2,ID=EL4_18_2,ID=B16_502-3,ID=B16_502-1,ID=B16_460-1,ID=EL4_70-1,ID=B16_485-2,ID=B16_16-2,ID=B16_474-3,ID=B16_474-4,ID=B16_474-5,ID=B16_497-1,ID=EL4_19_2,ID=B…	NA	NA
Fbn2	chr18	58008623	58209926	-	7	3.38164	0.0109605	0.0556896	6 [2,4]	1 [0,1]	1	ID=B16_464-1,ID=B16_485-2,ID=B16_451-5,ID=B16_462-4,ID=B16_484-4,ID=B16_484-1,ID=B16_499-2	NA	NA
Mup16	chr4	61515592	61519531	-	3	1.44928	0.0109559	0.0556896	1 [1,0]	2 [0,2]	1	ID=B16_485-3,ID=B16_450-1,ID=B16_462-4	NA	NA
Cyp4a31	chr4	115563649	115579015	+	5	2.41546	0.0109813	0.0557636	4 [2,2]	1 [1,0]	1	ID=B16_460-1,ID=B16_474-4,ID=EL4_67-2,ID=B16_484-1,ID=B16_491-3	NA	NA
Triqk	chr4	12906858	12983553	+	16	7.72947	0.0110051	0.0558493	16 [9,7]	0 [1,-1]	1	ID=B16_463-1,ID=B16_464-2,ID=B16_502-3,ID=B16_460-1,ID=B16PD1_537_4,ID=B16_474-3,ID=B16_474-4,ID=EL4_32_3,ID=B16_489-1,ID=B16_450-3,ID=B16_499-1,ID=B16_451-5,ID=B16_462-4,ID=EL4_65-1,ID=B16_484-1,ID=B16_491-3	NA	NA
AC153840.2	chr10	100651630	100651942	+	2	0.966184	0.0110483	0.0558493	0 [0,0]	2 [1,1]	1	ID=EL4_18_2,ID=EL4_45-1	NA	NA
CT030247.6	chr9	14807774	14808040	-	2	0.966184	0.0110483	0.0558493	0 [0,0]	2 [0,2]	1	ID=B16_450-3,ID=B16_451-5	NA	NA
Olfr159	chr4	43770050	43771009	-	2	0.966184	0.0110483	0.0558493	0 [0,0]	2 [0,2]	1	ID=EL4PD1_157-2,ID=B16_462-4	NA	NA
Rpl31-ps21	chr5	21119149	21119522	-	2	0.966184	0.0110483	0.0558493	0 [0,0]	2 [1,1]	1	ID=B16_485-3,ID=B16_485-2	NA	NA
Fam227b	chr2	125983483	126152004	-	6	2.89855	0.0110594	0.0558737	6 [3,3]	0 [0,0]	1	ID=B16_487-4,ID=B16_502-3,ID=B16_485-2,ID=B16_474-4,ID=EL4_34_5,ID=B16_474-2	NA	NA
Mup19	chr4	61778324	61782269	-	3	1.44928	0.0110739	0.0559153	0 [0,0]	3 [2,1]	1	ID=EL4_64-1,ID=EL4_62-1,ID=EL4PD1_152-1	NA	NA
Dmxl1	chr18	49832997	49965473	+	6	2.89855	0.0111398	0.0562162	6 [1,5]	0 [0,0]	0.855743	ID=B16_463-1,ID=B16_464-2,ID=EL4PD1_104-1,ID=B16_474-4,ID=B16_462-4,ID=LLC_174-1	NA	NA
Ubr1	chr2	120860269	120970715	-	3	1.44928	0.0112275	0.0566266	3 [2,1]	0 [0,0]	1	ID=B16_464-2,ID=B16_460-1,ID=B16_489-1	NA	NA
Rpsa-ps11	chr4	59162268	59163156	-	2	0.966184	0.0112523	0.0566556	0 [0,0]	2 [2,0]	1	ID=B16_460-1,ID=B16_489-1	NA	NA
Usp29	chr7	6730583	6967219	+	8	3.86473	0.0112639	0.056682	8 [5,3]	0 [0,0]	1	ID=B16_463-1,ID=B16_498-1,ID=B16_502-3,ID=B16_474-3,ID=EL4_27_3,ID=B16_486-3,ID=B16_451-5,ID=B16_491-3	NA	NA
CT025680.2	chr9	38945914	38949211	+	3	1.44928	0.0113124	0.0568296	1 [1,0]	2 [2,0]	1	ID=B16_487-4,ID=B16_450-1,ID=B16_474-4	NA	NA
R3hdm2	chr10	127380662	127499360	+	2	0.966184	0.0113093	0.0568296	2 [0,2]	0 [0,0]	1	ID=B16_460-1,ID=B16PD1_533_1	NA	NA
Aadacl3	chr4	144453771	144463756	-	4	1.93237	0.0113322	0.0568974	3 [2,1]	1 [0,1]	1	ID=B16_460-1,ID=B16_474-4,ID=EL4_59-1,ID=B16_462-4	NA	NA
Tanc1	chr2	59612044	59846149	+	7	3.38164	0.0113412	0.0569103	7 [5,2]	0 [0,0]	1	ID=B16_463-1,ID=B16_488-3,ID=B16_464-2,ID=B16_489-1,ID=B16_462-4,ID=B16PD1_160-2,ID=B16_499-2	NA	NA
Gfra1	chr19	58235604	58455398	-	6	2.89855	0.0113844	0.057095	6 [3,3]	0 [0,0]	1	ID=B16_463-1,ID=B16_485-1,ID=B16_474-5,ID=EL4PD1_115-2,ID=B16_450-3,ID=B16_451-5	NA	NA
Astn2	chr4	65380803	66404611	-	75	36.2319	0.0114472	0.0573064	75 [36,39]	0 [0,0]	0.997178	ID=B16_463-1,ID=EL4_28_4,ID=B16_455-2,ID=EL4_28_1,ID=EL4_28_2,ID=B16_488-3,ID=EL4PD1_116-1,ID=B16_464-2,ID=B16_464-1,ID=B16_485-1,ID=B16_487-4,ID=B16_485-3,ID=B16_487-2,ID=EL4PD1_114-3,ID=B16_450-1,ID=B16_498-2,ID=B16_498-1,ID=B16_502-3,ID=B16_502-1,ID=B16_460-1,ID=EL4_22_3,ID=B16_485-2,ID=B16_16-2,ID=B16_474-3,ID=B16_474-4,ID=B16_474-5,ID=B16_16-4,ID=B16_497-1,ID=EL4_19_2,ID=B16_497-2,ID=EL4_27_…	NA	NA
Tbpl2	chr2	24071721	24096595	-	7	3.38164	0.011466	0.0573108	6 [1,5]	1 [1,0]	1	ID=B16_488-3,ID=B16_460-1,ID=B16_449-3,ID=B16_522-1,ID=B16_451-3,ID=B16_461-1,ID=B16_516-2	NA	NA
Rapgef5	chr12	117516479	117759737	+	10	4.83092	0.0115887	0.0578868	10 [4,6]	0 [0,0]	1	ID=B16_463-1,ID=B16PD1_534_1,ID=B16_498-1,ID=B16_474-3,ID=B16_474-4,ID=B16_486-3,ID=B16PD1_163-2,ID=EL4_62-1,ID=EL4_72-3,ID=B16_499-2	NA	NA
Tacr1	chr6	82402475	82560099	+	4	1.93237	0.0115943	0.0578868	4 [0,4]	0 [0,0]	1	ID=B16_488-3,ID=B16_474-4,ID=EL4_62-1,ID=B16_484-1	NA	NA
Dock8	chr19	24999529	25202432	+	6	2.89855	0.0116174	0.0579698	6 [3,3]	0 [0,0]	1	ID=B16_464-2,ID=B16_464-1,ID=B16_474-4,ID=B16_486-3,ID=EL4_52-5,ID=B16_499-1	NA	NA
Pde4dip	chr3	97689824	97888707	-	6	2.89855	0.0116258	0.0579793	6 [5,1]	0 [0,0]	1	ID=B16_464-2,ID=B16_450-1,ID=B16_460-1,ID=B16_451-5,ID=EL4_54-2,ID=B16_499-2	NA	NA
CT030170.6	chr12	17900734	18062464	+	4	1.93237	0.0116467	0.0580512	4 [1,3]	0 [0,0]	1	ID=B16_485-3,ID=B16_474-3,ID=EL4_34_5,ID=B16_499-2	NA	NA
Rab3a	chr8	70754679	70758677	+	2	0.966184	0.0116675	0.05809	2 [0,2]	0 [0,0]	1	ID=EL4_52-5,ID=EL4_54-4	NA	NA
Zfp689	chr7	127442136	127449158	-	3	1.44928	0.0116765	0.0581023	0 [0,0]	3 [3,0]	1	ID=EL4_46-2,ID=EL4_27_3,ID=B16_521-1	NA	NA
Tbc1d19	chr5	53809627	53903965	+	2	0.966184	0.0116978	0.0581759	2 [2,0]	0 [0,0]	1	ID=B16_474-4,ID=B16_516-2	NA	NA
Pip5k1b	chr19	24294794	24555872	-	10	4.83092	0.0117229	0.0582353	10 [7,3]	0 [0,0]	1	ID=B16PD1_534_1,ID=B16_450-1,ID=B16_498-1,ID=B16_502-3,ID=B16PD1_537_2,ID=B16_474-3,ID=B16_474-4,ID=B16_485-4,ID=B16_499-2,ID=B16_491-3	NA	NA
Cacnb4	chr2	52428325	52676831	-	9	4.34783	0.0117199	0.0582353	9 [3,6]	0 [0,0]	1	ID=B16_464-1,ID=B16_485-1,ID=B16_450-1,ID=B16_502-3,ID=B16_474-4,ID=B16_486-3,ID=B16_489-1,ID=B16_499-1,ID=B16_491-3	NA	NA
Fkbp15	chr4	62300342	62360470	-	11	5.31401	0.0117532	0.0583537	11 [9,2]	0 [0,0]	0.990835	ID=B16_463-1,ID=B16_464-2,ID=EL4_68-1,ID=B16_502-3,ID=B16_460-1,ID=B16_474-3,ID=B16_474-4,ID=B16_489-1,ID=B16_462-4,ID=EL4PD1_104-3,ID=B16_491-3	NA	NA
Olfr270	chr4	52964547	52972474	+	4	1.93237	0.0117605	0.0583572	4 [4,0]	0 [0,0]	1	ID=B16_498-2,ID=B16_497-1,ID=B16_489-1,ID=B16_474-1	NA	NA
Adamts12	chr15	11064790	11346867	+	13	6.28019	0.0117713	0.0583711	13 [9,4]	0 [0,0]	0.992524	ID=B16_463-1,ID=B16_488-3,ID=B16_487-4,ID=EL4_18_2,ID=B16_485-2,ID=B16_474-3,ID=B16_474-4,ID=EL4_32_3,ID=B16_521-1,ID=B16_489-1,ID=B16_451-3,ID=B16_499-2,ID=B16_491-3	NA	NA
Trio	chr15	27730652	28025848	-	9	4.34783	0.0117764	0.0583711	9 [4,5]	0 [0,0]	1	ID=B16_463-1,ID=B16_488-3,ID=B16_464-1,ID=B16_487-2,ID=B16_474-4,ID=B16_474-5,ID=B16_474-1,ID=LLC_170-1,ID=B16_491-3	NA	NA
Tbck	chr3	132684144	132841688	+	6	2.89855	0.0118293	0.0586007	6 [2,4]	0 [0,0]	1	ID=B16_464-1,ID=B16_474-3,ID=B16_497-1,ID=B16_451-5,ID=B16_451-3,ID=B16_491-2	NA	NA
St8sia1	chr6	142821545	142964452	-	3	1.44928	0.0118574	0.0587074	3 [3,0]	0 [0,0]	1	ID=B16_463-1,ID=B16_460-1,ID=EL4_62-1	NA	NA
Cecr2	chr6	120666421	120771190	+	2	0.966184	0.0118737	0.0587554	2 [2,0]	0 [0,0]	1	ID=B16_464-1,ID=EL4PD1_157-2	NA	NA
Ptpre	chr7	135537481	135686293	+	2	0.966184	0.011883	0.0587689	2 [0,2]	0 [0,0]	1	ID=B16_463-1,ID=B16_464-2	NA	NA
Pcdha7	chr18	36973802	37187657	+	9	4.34783	0.0119967	0.0592327	8 [2,6]	1 [0,1]	1	ID=B16_463-1,ID=B16_464-2,ID=B16_464-1,ID=B16_450-1,ID=B16_489-1,ID=B16_451-5,ID=B16_462-4,ID=B16PD1_163-3,ID=B16_484-1	NA	NA
Zfand3	chr17	30005087	30210019	+	7	3.38164	0.0119872	0.0592327	7 [2,5]	0 [0,0]	1	ID=B16_463-1,ID=B16_488-3,ID=EL4PD1_116-1,ID=B16_464-2,ID=B16_485-1,ID=B16_499-1,ID=B16_484-1	predicted cancer driver	human T-ALL driver
Srgap3	chr6	112717971	112947266	-	6	2.89855	0.0119928	0.0592327	6 [2,4]	0 [0,0]	1	ID=B16_488-3,ID=B16_464-2,ID=B16_464-1,ID=B16_450-1,ID=B16_460-1,ID=B16_474-4	NA	NA
Abcc9	chr6	142587862	142702274	-	2	0.966184	0.0120238	0.0593336	1 [1,0]	1 [1,0]	1	ID=B16_464-2,ID=B16_498-1	NA	NA
AC119894.1	chr10	73372332	73376033	-	3	1.44928	0.0120485	0.0594225	2 [0,2]	1 [1,0]	1	ID=B16_485-1,ID=B16_487-4,ID=B16_518-2	NA	NA
Pcdha1	chr18	36930184	37187661	+	12	5.7971	0.0120758	0.0594746	10 [3,7]	2 [1,1]	1	ID=B16_463-1,ID=B16_464-2,ID=B16_464-1,ID=B16_450-1,ID=B16_474-3,ID=EL4_59-1,ID=B16_489-1,ID=B16_450-3,ID=B16_451-5,ID=B16_462-4,ID=B16PD1_163-3,ID=B16_484-1	NA	NA
Lekr1	chr3	65684053	65831159	+	5	2.41546	0.0121115	0.0595026	5 [5,0]	0 [0,0]	1	ID=B16_498-1,ID=B16_474-3,ID=B16_474-4,ID=B16_497-1,ID=B16_499-1	NA	NA
Olfr718-ps1	chr5	143134014	143147557	-	4	1.93237	0.0121112	0.0595026	3 [2,1]	1 [1,0]	1	ID=B16_464-2,ID=B16_502-3,ID=B16_474-4,ID=B16_462-4	NA	NA
Rab2b	chr14	52261759	52279545	-	5	2.41546	0.0121764	0.0597557	0 [0,0]	5 [2,3]	0.937609	ID=B16_463-1,ID=B16_464-2,ID=B16_485-1,ID=B16_486-3,ID=B16_499-1	NA	NA
Dnah12	chr14	26693274	26816334	+	3	1.44928	0.0122087	0.0598813	3 [1,2]	0 [0,0]	1	ID=B16_463-1,ID=B16_464-1,ID=B16_474-3	NA	NA
Ranbp17	chr11	33211795	33513746	-	16	7.72947	0.012251	0.0600556	16 [9,7]	0 [0,0]	1	ID=B16_463-1,ID=EL4_28_1,ID=B16_464-2,ID=B16_464-1,ID=B16_498-2,ID=B16_474-3,ID=B16_474-4,ID=B16_497-1,ID=EL4_32_2,ID=B16_450-3,ID=B16_449-4,ID=B16_451-5,ID=B16_474-1,ID=B16_484-1,ID=B16_499-2,ID=B16_491-3	NA	NA
Mcu	chr10	59446984	59616692	-	5	2.41546	0.0122641	0.0600865	5 [1,4]	0 [0,0]	1	ID=B16_464-1,ID=EL4_45-1,ID=B16_474-3,ID=EL4_70-3,ID=B16_499-1	NA	NA
Olfr867	chr9	20050955	20057562	-	4	1.93237	0.0122892	0.0601434	4 [3,1]	0 [0,0]	1	ID=B16_464-2,ID=B16_498-2,ID=B16_485-4,ID=LLC_174-1	NA	NA
AC069561.5	chr9	38647486	38658393	-	5	2.41546	0.0123147	0.0602023	2 [1,1]	3 [2,1]	1	ID=B16_464-2,ID=B16_502-3,ID=B16_474-3,ID=B16_474-4,ID=B16_450-3	NA	NA
Olfr851	chr9	19493295	19502815	+	5	2.41546	0.0123147	0.0602023	5 [2,3]	0 [0,0]	1	ID=B16_485-1,ID=B16_485-3,ID=B16_474-3,ID=B16_462-4,ID=B16_499-2	NA	NA
Lrch2	chrX	147470380	147554081	-	2	0.966184	0.0123686	0.0604323	2 [1,1]	0 [0,0]	1	ID=B16_463-1,ID=B16_460-1	NA	NA
Bag1	chr4	40936399	40948294	-	4	1.93237	0.0123789	0.0604496	3 [2,1]	1 [1,0]	1	ID=B16_460-1,ID=EL4_55-2,ID=B16_484-1,ID=B16_499-2	NA	NA
Tacr3	chr3	134829007	134934579	+	3	1.44928	0.0123977	0.0605086	3 [1,2]	0 [0,0]	1	ID=B16_463-1,ID=B16_488-3,ID=B16_474-3	NA	NA
Dab2	chr15	6299788	6440712	+	4	1.93237	0.0124529	0.0607444	3 [2,1]	1 [1,0]	1	ID=B16_463-1,ID=B16_498-1,ID=B16_484-1,ID=EL4PD1_117-1	NA	NA
Mbip	chr12	56328303	56345894	-	6	2.89855	0.0124665	0.0607777	6 [5,1]	0 [0,0]	0.856285	ID=EL4PD1_116-2,ID=EL4PD1_114-1,ID=EL4PD1_118-2,ID=EL4PD1_117-3,ID=EL4PD1_117-1,ID=EL4PD1_118-1	NA	NA
Itgb8	chr12	119158022	119238802	-	16	7.72947	0.012481	0.0608151	16 [6,10]	0 [0,0]	0.999981	ID=B16_463-1,ID=EL4_28_4,ID=EL4_28_3,ID=B16_488-3,ID=B16_464-1,ID=B16_502-3,ID=B16PD1_537_1,ID=B16_474-3,ID=EL4_19_2,ID=B16_497-2,ID=EL4_32_3,ID=EL4_59-1,ID=EL4_33_2,ID=B16_489-1,ID=B16_450-3,ID=EL4_29_2	NA	NA
Cradd	chr10	95174746	95324108	-	3	1.44928	0.0126575	0.0616076	3 [2,1]	0 [0,0]	1	ID=B16_464-1,ID=EL4_45-1,ID=B16_518-1	NA	NA
Ikbkap	chr4	56749680	56802331	-	10	4.83092	0.0127088	0.0618234	10 [7,3]	0 [0,0]	1	ID=B16_488-3,ID=B16_464-1,ID=B16_498-1,ID=B16_460-1,ID=B16_16-1,ID=B16_474-3,ID=B16_450-3,ID=B16_451-3,ID=B16_462-4,ID=B16_484-1	NA	NA
Gnal	chr18	67088336	67226792	+	3	1.44928	0.0128336	0.0623627	3 [2,1]	0 [0,0]	1	ID=B16_464-1,ID=B16_450-3,ID=EL4_47-1	NA	NA
Rchy1	chr5	91948904	91963068	-	5	2.41546	0.0128792	0.0625159	5 [3,2]	0 [0,0]	1	ID=EL4_18_2,ID=EL4_32_1,ID=EL4_32_3,ID=EL4_24_1,ID=EL4_29_2	NA	NA
Cdh9	chr15	16778101	16857094	+	2	0.966184	0.0128738	0.0625159	2 [1,1]	0 [0,0]	1	ID=B16_460-1,ID=B16_474-4	NA	NA
St5	chr7	109553013	109703605	-	4	1.93237	0.0128907	0.0625376	4 [2,2]	0 [0,0]	1	ID=B16_488-3,ID=B16_464-1,ID=B16_498-1,ID=B16_451-5	NA	NA
Sh3bgrl	chrX	109095509	109197873	+	3	1.44928	0.0129127	0.0626103	3 [3,0]	0 [0,0]	1	ID=EL4_67-2,ID=EL4PD1_118-2,ID=EL4_54-2	NA	NA
Snx2	chr18	53176365	53220860	+	10	4.83092	0.0129204	0.0626136	10 [2,8]	0 [0,0]	1	ID=B16_463-1,ID=B16_464-2,ID=B16_464-1,ID=EL4PD1_116-3,ID=B16_502-3,ID=B16_474-3,ID=EL4PD1_115-2,ID=EL4_55-2,ID=EL4_38_3,ID=B16_462-4	NA	NA
Gja5	chr3	96904693	97077416	+	4	1.93237	0.0129392	0.0626705	4 [2,2]	0 [0,0]	1	ID=B16_498-1,ID=B16_474-4,ID=B16_497-1,ID=B16_499-1	NA	NA
Ptprq	chr10	107517049	107720051	-	11	5.31401	0.0129511	0.0626941	11 [6,5]	0 [1,-1]	1	ID=B16PD1_534_1,ID=B16_464-1,ID=B16_485-3,ID=EL4_18_2,ID=B16_485-2,ID=B16_474-4,ID=B16PD1_531_1,ID=B16_499-1,ID=B16_474-1,ID=EL4_29_2,ID=B16_491-3	NA	NA
Ccni	chr5	93181933	93206495	-	7	3.38164	0.0129592	0.0626994	6 [3,3]	1 [1,0]	1	ID=B16_463-1,ID=B16_464-2,ID=B16_487-4,ID=B16_485-2,ID=B16_474-3,ID=EL4_55-2,ID=EL4_54-2	NA	NA
1810049J17Rik	chr15	12321438	12321899	-	2	0.966184	0.0129716	0.0627252	0 [0,0]	2 [2,0]	1	ID=B16_464-1,ID=B16_499-1	NA	NA
Mrps9	chr1	42851233	42905682	+	11	5.31401	0.0130434	0.0630384	11 [1,10]	0 [0,0]	0.934924	ID=B16_463-1,ID=B16_455-2,ID=B16_464-1,ID=B16_456-4,ID=B16_487-4,ID=B16_498-1,ID=B16_12-3,ID=B16_16-1,ID=B16_525-2,ID=B16_13-3,ID=B16_499-1	NA	NA
Evi5	chr5	107744795	107875107	-	4	1.93237	0.0131053	0.0633034	4 [3,1]	0 [0,0]	1	ID=B16_464-1,ID=B16_474-3,ID=EL4PD1_157-3,ID=B16_462-4	NA	NA
Rlf	chr4	121145883	121215084	-	13	6.28019	0.0131142	0.0633117	13 [6,7]	0 [0,0]	1	ID=B16_488-3,ID=B16_464-2,ID=B16_464-1,ID=B16_502-3,ID=B16_460-1,ID=B16_474-3,ID=B16_474-5,ID=B16_450-3,ID=B16_462-4,ID=EL4PD1_152-2,ID=B16_484-1,ID=B16_499-2,ID=B16_491-3	NA	NA
Klhl13	chrX	23219271	23365082	-	7	3.38164	0.0131805	0.0635973	7 [3,4]	0 [0,0]	1	ID=EL4_28_2,ID=B16_464-2,ID=EL4_49-1,ID=B16PD1_537_4,ID=B16_485-4,ID=B16_462-4,ID=B16_484-1	NA	NA
Slc22a23	chr13	34179158	34345182	-	4	1.93237	0.0132041	0.0636551	4 [1,3]	0 [0,0]	1	ID=B16_474-3,ID=B16_485-4,ID=EL4PD1_154-1,ID=EL4_47-2	NA	NA
Snapc4	chr2	26362765	26380649	-	4	1.93237	0.0132067	0.0636551	4 [0,4]	0 [0,0]	1	ID=B16_485-2,ID=EL4_27_3,ID=EL4_32_3,ID=EL4_29_2	NA	NA
Podn	chr4	108014797	108096445	-	12	5.7971	0.0132343	0.0637522	12 [7,5]	0 [0,0]	1	ID=B16_464-2,ID=B16_464-1,ID=B16_460-1,ID=B16_474-4,ID=B16_486-3,ID=EL4_67-4,ID=EL4_64-1,ID=EL4_70-3,ID=B16_462-4,ID=EL4_44-2,ID=EL4_72-3,ID=B16_491-3	NA	NA
AC119987.1	chr9	19219070	19232174	-	5	2.41546	0.0132412	0.0637522	2 [1,1]	3 [2,1]	1	ID=B16_450-1,ID=B16_502-3,ID=EL4_52-5,ID=B16_451-3,ID=B16_462-4	NA	NA
Pknox2	chr9	36890982	37147407	-	28	13.5266	0.0132519	0.0637696	28 [11,17]	0 [1,-1]	1	ID=EL4_28_4,ID=EL4_28_1,ID=B16_488-3,ID=B16_464-2,ID=B16_464-1,ID=B16_485-1,ID=B16_487-4,ID=B16_485-3,ID=B16_487-2,ID=B16_502-3,ID=B16_460-1,ID=EL4_45-1,ID=EL4_22_3,ID=B16_485-2,ID=B16_474-3,ID=B16_474-4,ID=EL4_27_3,ID=EL4_59-1,ID=EL4_32_2,ID=EL4PD1_150-2,ID=B16_489-1,ID=B16_451-5,ID=B16_451-3,ID=B16_475-1,ID=B16_462-4,ID=LLC_170-1,ID=EL4_72-3,ID=B16_491-3	NA	NA
Nrk	chrX	138914431	139010532	+	3	1.44928	0.0132744	0.0638432	3 [1,2]	0 [0,0]	1	ID=B16_463-1,ID=B16_474-3,ID=EL4_64-5	NA	NA
Myh10	chr11	68691915	68816632	+	2	0.966184	0.0132844	0.0638567	2 [0,2]	0 [0,0]	1	ID=EL4PD1_115-3,ID=B16_484-4	NA	NA
Itpr1	chr6	108213096	108551109	+	14	6.76329	0.0133366	0.0640732	14 [10,4]	0 [0,0]	1	ID=B16_464-1,ID=B16_498-1,ID=B16_502-3,ID=B16_474-3,ID=B16_474-4,ID=B16_497-1,ID=B16_486-3,ID=B16_450-3,ID=B16_449-4,ID=B16_499-1,ID=B16_451-5,ID=B16_462-4,ID=EL4_62-1,ID=B16_491-3	NA	NA
Olfr969	chr9	39790945	39796635	+	4	1.93237	0.0133958	0.064295	1 [1,0]	3 [0,3]	1	ID=B16_460-1,ID=B16_474-4,ID=B16_499-1,ID=B16_499-2	NA	NA
Homer1	chr13	93304799	93403681	+	3	1.44928	0.0133972	0.064295	3 [1,2]	0 [0,0]	1	ID=B16_474-4,ID=EL4_55-2,ID=LLC_174-1	NA	NA
Ralgapa1	chr12	55602899	55821167	-	12	5.7971	0.0134377	0.0644549	12 [6,6]	0 [0,0]	1	ID=B16_463-1,ID=B16_488-3,ID=B16_464-1,ID=B16_485-1,ID=B16_502-3,ID=EL4_27_3,ID=B16_485-4,ID=EL4_64-5,ID=B16_450-3,ID=B16_451-3,ID=LLC_170-1,ID=B16_499-2	NA	NA
Ica1	chr6	8630527	8778484	-	4	1.93237	0.0134541	0.0644985	4 [3,1]	0 [0,0]	1	ID=B16_464-2,ID=B16_460-1,ID=B16_474-3,ID=EL4PD1_150-3	NA	NA
Carmil1	chr13	24012659	24280795	-	10	4.83092	0.0134795	0.0645517	10 [3,7]	0 [0,0]	1	ID=B16_464-2,ID=B16_485-1,ID=EL4_45-1,ID=B16PD1_533_1,ID=B16_497-2,ID=EL4PD1_154-1,ID=B16_489-1,ID=B16_462-4,ID=B16_474-1,ID=EL4_54-2	NA	NA
Dyrk1a	chr16	94570010	94695067	+	3	1.44928	0.0134797	0.0645517	3 [3,0]	0 [0,0]	1	ID=B16_464-1,ID=B16_449-4,ID=B16_499-1	NA	NA
Mamld1	chrX	71050256	71156056	+	2	0.966184	0.0135051	0.0646389	2 [2,0]	0 [0,0]	1	ID=B16_464-2,ID=B16_498-1	NA	NA
Tex14	chr11	87405065	87555823	+	4	1.93237	0.0135249	0.0646989	3 [0,3]	1 [1,0]	1	ID=B16_464-1,ID=B16_16-4,ID=B16_489-1,ID=B16_499-2	NA	NA
Rars2	chr4	34614957	34660167	+	10	4.83092	0.0135345	0.0647102	10 [5,5]	0 [0,0]	0.928486	ID=B16_485-1,ID=B16_498-2,ID=B16_474-3,ID=B16_474-4,ID=B16_450-3,ID=B16_451-5,ID=B16_451-3,ID=B16_462-4,ID=B16_474-1,ID=B16_491-3	NA	NA
Grin3a	chr4	49661611	49845549	-	27	13.0435	0.0135678	0.0647353	27 [18,9]	0 [0,0]	0.999134	ID=B16_488-3,ID=B16_464-2,ID=EL4PD1_116-3,ID=B16_485-1,ID=B16_450-1,ID=B16_502-3,ID=B16_460-1,ID=B16_485-2,ID=B16_474-3,ID=B16_474-4,ID=B16_497-1,ID=B16_497-2,ID=EL4_59-1,ID=EL4PD1_150-2,ID=B16_485-4,ID=EL4_52-5,ID=B16_489-1,ID=B16_450-3,ID=B16_449-4,ID=B16_451-3,ID=B16_475-1,ID=B16_462-4,ID=EL4_44-2,ID=B16_474-1,ID=B16_484-4,ID=B16_499-2,ID=B16_491-3	NA	NA
Pate2	chr9	35570284	35690318	+	19	9.17874	0.0135519	0.0647353	19 [6,13]	0 [0,0]	1	ID=B16_456-4,ID=B16_502-3,ID=EL4_49-1,ID=B16_452-1,ID=B16_460-1,ID=B16_485-2,ID=B16_474-4,ID=B16_489-1,ID=B16_450-3,ID=B16_449-3,ID=B16_449-4,ID=B16_499-1,ID=B16_451-5,ID=B16_453-2,ID=B16_462-4,ID=B16_484-1,ID=EL4_54-2,ID=B16_499-2,ID=B16_491-3	NA	NA
Dcdc2a	chr13	25056253	25210706	+	4	1.93237	0.0135655	0.0647353	4 [2,2]	0 [0,0]	1	ID=B16_464-1,ID=B16_498-1,ID=B16_486-3,ID=B16_491-3	NA	NA
Sh3d19	chr3	85971109	86083538	+	2	0.966184	0.0135688	0.0647353	2 [1,1]	0 [0,0]	1	ID=B16_474-3,ID=B16_450-3	NA	NA
Cdc26	chr4	62383654	62408642	-	6	2.89855	0.0135936	0.0648186	6 [2,4]	0 [0,0]	1	ID=B16_488-3,ID=B16_474-4,ID=EL4_55-2,ID=B16_489-1,ID=B16_462-4,ID=EL4_54-2	NA	NA
Evc	chr5	37289098	37333566	-	7	3.38164	0.0136263	0.0649398	7 [5,2]	0 [0,0]	1	ID=EL4_22_3,ID=B16PD1_537_4,ID=EL4_32_3,ID=B16_14-1,ID=B16_484-2,ID=B16_516-2,ID=B16_474-2	NA	NA
Rnf144b	chr13	47122720	47247991	+	2	0.966184	0.0136436	0.0649875	2 [0,2]	0 [0,0]	1	ID=B16_487-4,ID=B16_486-3	NA	NA
Abtb2	chr2	103566310	103718423	+	3	1.44928	0.0137301	0.0653298	3 [1,2]	0 [0,0]	1	ID=B16_464-1,ID=B16_485-1,ID=B16_460-1	NA	NA
Rhox4g	chrX	37646500	37651327	-	3	1.44928	0.0137526	0.0654018	2 [0,2]	1 [1,0]	1	ID=B16_498-2,ID=B16_474-3,ID=B16_451-3	NA	NA
Htr7	chr19	35958734	36057360	-	2	0.966184	0.0137943	0.0655652	2 [1,1]	0 [0,0]	1	ID=B16_474-4,ID=LLC_174-1	NA	NA
Ccdc85a	chr11	28385692	28584324	-	10	4.83092	0.0138558	0.0658227	9 [5,4]	1 [1,0]	1	ID=B16_463-1,ID=B16_498-1,ID=B16_460-1,ID=EL4_37_2,ID=EL4PD1_114-1,ID=B16PD1_531_2,ID=B16PD1_531_1,ID=EL4_62-1,ID=B16_499-2,ID=EL4_61-2	NA	NA
Klhl21	chr4	152008803	152017680	+	3	1.44928	0.0138899	0.0659149	2 [1,1]	1 [0,1]	1	ID=B16_488-3,ID=B16_502-1,ID=B16_489-1	NA	NA
Mmp3	chr9	7445822	7455975	+	4	1.93237	0.0140721	0.0667434	4 [3,1]	0 [0,0]	1	ID=B16_460-1,ID=B16_474-3,ID=B16_474-4,ID=B16_462-4	NA	NA
Pak7	chr2	136081104	136387938	-	18	8.69565	0.014162	0.066875	17 [8,9]	1 [0,1]	0.993739	ID=B16_463-1,ID=B16_464-1,ID=EL4_60-1,ID=B16_487-2,ID=EL4PD1_114-3,ID=LLC_172-2,ID=EL4_49-1,ID=EL4_22_3,ID=B16_474-4,ID=B16_486-3,ID=EL4PD1_115-3,ID=EL4_64-1,ID=EL4_36_3,ID=EL4_36_2,ID=EL4_38_3,ID=B16_462-4,ID=B16_484-1,ID=B16_499-2	NA	NA
Disp3	chr4	148240264	148287965	-	7	3.38164	0.0141563	0.066875	5 [3,2]	2 [1,1]	1	ID=B16_464-2,ID=B16_460-1,ID=B16_474-3,ID=B16_497-1,ID=B16_451-5,ID=LLC_174-1,ID=B16_491-3	NA	NA
Samsn1	chr16	75858794	76022270	-	7	3.38164	0.0141545	0.066875	7 [3,4]	0 [0,0]	1	ID=B16_488-3,ID=B16_464-2,ID=B16_487-2,ID=B16_460-1,ID=B16_474-4,ID=B16_499-2,ID=B16_491-3	NA	NA
Prdx1	chr4	116685544	116700822	+	5	2.41546	0.0141394	0.066875	5 [3,2]	0 [0,0]	1	ID=B16_485-1,ID=B16_474-3,ID=B16_485-4,ID=EL4_64-1,ID=B16_450-3	NA	NA
Dact2	chr17	14195231	14203831	-	3	1.44928	0.0141674	0.066875	3 [0,3]	0 [0,0]	1	ID=B16_502-3,ID=B16_489-1,ID=B16_462-4	NA	NA
Cebpa	chr7	35119293	35121928	+	2	0.966184	0.0141259	0.066875	1 [1,0]	1 [1,0]	1	ID=B16_498-1,ID=B16_474-1	NA	NA
Slc16a7	chr10	125227485	125389465	-	6	2.89855	0.0142462	0.0672115	6 [5,1]	0 [0,0]	1	ID=B16_502-3,ID=B16_474-4,ID=EL4_52-5,ID=B16_462-4,ID=EL4PD1_152-2,ID=EL4PD1_117-3	NA	NA
Scn9a	chr2	66480080	66634952	-	7	3.38164	0.0142647	0.0672629	7 [4,3]	0 [0,0]	1	ID=B16_464-1,ID=B16_487-4,ID=B16_502-3,ID=B16_474-3,ID=B16_474-4,ID=EL4_36_3,ID=B16_499-1	NA	NA
Rps6ka3	chrX	159210307	159364502	+	7	3.38164	0.0143049	0.0674171	7 [2,5]	0 [0,0]	1	ID=B16_450-1,ID=B16_502-3,ID=B16_474-3,ID=EL4_32_2,ID=EL4_67-1,ID=B16_499-1,ID=B16_451-3	NA	NA
Chd3os	chr11	69340461	69342641	+	2	0.966184	0.0143642	0.0675892	2 [0,2]	0 [0,0]	1	ID=B16_489-1,ID=B16_499-2	NA	NA
Ifna4	chr4	88841861	88842421	+	2	0.966184	0.0143642	0.0675892	0 [0,0]	2 [2,0]	1	ID=LLC_172-2,ID=B16_491-3	NA	NA
Fntb	chr12	76765589	76920659	+	3	1.44928	0.0143875	0.0676628	3 [2,1]	0 [-1,1]	1	ID=EL4PD1_149-4,ID=B16_460-1,ID=B16_474-3	NA	NA
Foxj3	chr4	119539661	119629119	+	16	7.72947	0.014439	0.0678693	16 [12,4]	0 [0,0]	1	ID=B16_463-1,ID=B16_488-3,ID=B16_464-2,ID=B16_464-1,ID=B16_485-1,ID=B16_498-2,ID=B16_498-1,ID=B16_502-3,ID=B16_460-1,ID=B16_474-3,ID=B16_474-4,ID=B16_450-3,ID=B16_462-4,ID=B16_474-1,ID=B16_499-2,ID=B16_491-3	NA	NA
Rundc3b	chr5	8490334	8622952	-	5	2.41546	0.014468	0.06797	5 [4,1]	0 [0,0]	1	ID=B16_464-2,ID=B16_474-4,ID=B16_450-3,ID=B16_499-1,ID=B16_524-2	NA	NA
Inpp5b	chr4	124741850	124801511	+	9	4.34783	0.0145038	0.0681023	9 [3,6]	0 [0,0]	1	ID=B16_464-2,ID=B16_474-3,ID=B16_474-4,ID=B16_485-4,ID=EL4_64-2,ID=EL4_64-1,ID=B16_451-3,ID=B16_462-4,ID=EL4_72-3	NA	NA
Wdr36	chr18	32837225	32866420	+	8	3.86473	0.0145271	0.0681755	8 [7,1]	0 [0,0]	1	ID=B16_464-2,ID=B16_485-1,ID=B16_450-1,ID=B16_502-3,ID=B16_502-1,ID=B16_474-3,ID=B16_451-3,ID=B16_484-2	NA	NA
Cyp4a14	chr4	115486200	115496142	-	4	1.93237	0.0145694	0.0683384	1 [1,0]	3 [1,2]	1	ID=EL4_64-5,ID=B16_462-4,ID=EL4_65-1,ID=EL4_62-1	NA	NA
Nbas	chr12	13269133	13583811	+	16	7.72947	0.0145793	0.0683486	16 [10,6]	0 [0,0]	0.999529	ID=B16_463-1,ID=B16_488-3,ID=B16_101NT-3,ID=B16_464-2,ID=EL4_60-1,ID=B16_498-1,ID=B16_460-1,ID=B16_474-3,ID=B16_474-4,ID=EL4PD1_115-3,ID=B16PD1_531_2,ID=EL4_64-1,ID=EL4_36_3,ID=EL4_38_3,ID=B16_484-2,ID=B16_491-3	NA	NA
Olfr919	chr9	38696804	38703673	-	4	1.93237	0.0146703	0.0687392	3 [0,3]	1 [1,0]	1	ID=B16_485-4,ID=B16_521-1,ID=B16_451-5,ID=B16_474-1	NA	NA
Adamts20	chr15	94270163	94404258	-	4	1.93237	0.014698	0.0688328	4 [2,2]	0 [0,0]	1	ID=B16_463-1,ID=B16_3-4,ID=B16_464-2,ID=EL4_49-1	NA	NA
Macc1	chr12	119314270	119466934	+	7	3.38164	0.0147448	0.0690153	7 [0,7]	0 [0,0]	1	ID=B16_463-1,ID=EL4_60-2,ID=B16_464-1,ID=EL4_60-1,ID=B16_497-2,ID=B16_499-1,ID=B16_491-3	NA	NA
Shisa6	chr11	66211725	66525795	-	14	6.76329	0.0147647	0.0690726	14 [10,4]	0 [0,0]	1	ID=B16_463-1,ID=EL4_60-2,ID=B16_101NT-3,ID=B16_464-2,ID=B16_464-1,ID=B16_498-1,ID=B16_502-3,ID=B16_460-1,ID=EL4_46-2,ID=B16PD1_537_4,ID=EL4_36_3,ID=B16_451-5,ID=B16_462-4,ID=B16_491-3	NA	NA
Tacc2	chr7	130577484	130764784	+	4	1.93237	0.0149086	0.0696723	4 [4,0]	0 [0,0]	1	ID=B16PD1_533_3,ID=EL4_33_2,ID=EL4_36_4,ID=B16_491-2	NA	NA
Msra	chr14	64122625	64455903	-	13	6.28019	0.014977	0.0698824	13 [6,7]	0 [0,0]	1	ID=B16_463-1,ID=B16_464-2,ID=B16_485-3,ID=B16_460-1,ID=B16_474-3,ID=B16_497-1,ID=B16_485-4,ID=B16_489-1,ID=B16_499-1,ID=EL4PD1_118-2,ID=B16_462-4,ID=B16_499-2,ID=B16_491-3	NA	NA
Reps2	chrX	162411954	162643649	-	11	5.31401	0.0149695	0.0698824	11 [7,4]	0 [0,0]	1	ID=B16_488-3,ID=B16_464-2,ID=B16_487-2,ID=B16_502-3,ID=B16_460-1,ID=B16_474-3,ID=EL4_34_5,ID=B16PD1_532_1,ID=EL4PD1_157-2,ID=B16_489-1,ID=B16_462-4	NA	NA
Top1mt	chr15	75657035	75678800	-	4	1.93237	0.0149759	0.0698824	3 [0,3]	1 [0,1]	1	ID=B16_502-3,ID=B16_450-3,ID=B16_462-4,ID=EL4_47-2	NA	NA
Nox4	chr7	87246649	87398710	+	7	3.38164	0.0150064	0.0699461	7 [4,3]	0 [0,0]	1	ID=B16_463-1,ID=B16_488-3,ID=B16_502-3,ID=B16_474-3,ID=B16_450-3,ID=B16_499-1,ID=EL4_62-1	NA	NA
Plekhh2	chr17	84511895	84622142	+	2	0.966184	0.0150021	0.0699461	2 [1,1]	0 [0,0]	1	ID=B16_464-1,ID=B16_491-3	NA	NA
AC161829.1	chr10	5091006	5091286	-	2	0.966184	0.0150943	0.0701722	0 [0,0]	2 [2,0]	1	ID=EL4_28_3,ID=EL4_18_2	NA	NA
Atf7	chr15	102525946	102625073	-	2	0.966184	0.0150847	0.0701722	2 [0,2]	0 [0,0]	1	ID=B16_474-4,ID=B16_499-1	NA	NA
Hoxb1	chr11	96365752	96368256	+	2	0.966184	0.0150943	0.0701722	0 [0,0]	2 [1,1]	1	ID=B16_462-4,ID=B16_474-1	NA	NA
Tmem229b	chr12	78961795	79007627	-	8	3.86473	0.0151113	0.0702148	8 [2,6]	0 [2,-2]	1	ID=B16_463-1,ID=B16_464-1,ID=B16_498-1,ID=B16_499-1,ID=EL4_24_1,ID=B16_462-4,ID=B16_484-1,ID=B16_484-2	NA	NA
Ppp1r12a	chr10	108162400	108277575	+	4	1.93237	0.0151674	0.0704019	4 [1,3]	0 [0,0]	1	ID=B16_464-1,ID=B16_460-1,ID=B16PD1_533_3,ID=B16_491-3	NA	NA
Itgbl1	chr14	123659971	123975618	+	19	9.17874	0.0152621	0.0708048	18 [14,4]	1 [1,0]	1	ID=B16PD1_534_3,ID=EL4_28_4,ID=EL4_28_3,ID=B16_464-2,ID=B16_464-1,ID=EL4_18_2,ID=B16PD1_533_2,ID=B16_474-3,ID=B16_474-4,ID=B16_474-5,ID=B16_486-3,ID=EL4_55-2,ID=EL4_36_3,ID=B16_499-1,ID=B16_484-2,ID=EL4_72-3,ID=EL4_54-2,ID=B16_520-2,ID=B16_491-2	NA	NA
Olfr902	chr9	38447652	38450576	+	3	1.44928	0.015314	0.0710085	0 [0,0]	3 [2,1]	1	ID=B16_464-2,ID=EL4_60-1,ID=B16_474-4	NA	NA
Vwa5a	chr9	38718268	38743337	+	7	3.38164	0.0153756	0.0711459	6 [2,4]	1 [1,0]	1	ID=EL4PD1_116-2,ID=B16_502-3,ID=B16_474-4,ID=B16_462-4,ID=EL4_47-2,ID=B16_499-2,ID=EL4PD1_152-1	NA	NA
Tcf12	chr9	71842688	72111847	-	16	7.72947	0.0154812	0.0715977	16 [6,10]	0 [0,0]	1	ID=B16_463-1,ID=B16_464-2,ID=B16_464-1,ID=EL4PD1_116-3,ID=B16_485-3,ID=EL4PD1_114-3,ID=B16_498-1,ID=B16_460-1,ID=B16_474-3,ID=B16_474-4,ID=B16_449-4,ID=B16_499-1,ID=B16_451-3,ID=LLC_174-1,ID=EL4_62-1,ID=B16_499-2	NA	NA
Poln	chr5	34007198	34169448	-	6	2.89855	0.0155045	0.0716311	6 [5,1]	0 [0,0]	1	ID=B16_485-1,ID=B16_474-3,ID=B16_497-1,ID=B16_485-4,ID=EL4_65-1,ID=EL4_62-1	NA	NA
Hivep1	chr13	42052021	42185026	+	3	1.44928	0.0155209	0.0716695	2 [1,1]	1 [0,1]	1	ID=B16_521-1,ID=B16_489-1,ID=B16PD1_160-3	NA	NA
Pak1	chr7	97788541	97911883	+	4	1.93237	0.0155464	0.0717501	4 [2,2]	0 [0,0]	1	ID=B16_463-1,ID=EL4PD1_116-3,ID=B16PD1_533_2,ID=EL4PD1_157-1	NA	NA
Wdr31	chr4	62448653	62468888	-	5	2.41546	0.0155663	0.0718049	4 [2,2]	1 [0,1]	1	ID=B16_464-2,ID=B16_474-4,ID=B16_486-3,ID=EL4PD1_150-2,ID=B16_484-2	NA	NA
Ntrk3	chr7	78175959	78578408	-	19	9.17874	0.0155857	0.071838	19 [14,5]	0 [0,0]	1	ID=B16_463-1,ID=B16_464-2,ID=B16_464-1,ID=B16_487-2,ID=B16_498-2,ID=B16_498-1,ID=EL4_22_3,ID=B16_474-3,ID=B16_497-1,ID=B16_485-4,ID=B16PD1_531_2,ID=B16_489-1,ID=B16_450-3,ID=B16_449-4,ID=B16_451-3,ID=B16_461-1,ID=B16_462-4,ID=B16_499-2,ID=B16_491-2	NA	NA
Atrx	chrX	105797615	105929403	-	5	2.41546	0.0155896	0.071838	5 [5,0]	0 [0,0]	1	ID=B16_464-2,ID=EL4_60-1,ID=B16_460-1,ID=B16_474-4,ID=B16_491-3	NA	NA
Fbn1	chr2	125300627	125507993	-	7	3.38164	0.0156087	0.0718572	7 [3,4]	0 [0,0]	1	ID=B16_464-2,ID=B16_450-1,ID=B16_502-3,ID=B16_452-1,ID=B16_474-4,ID=EL4_64-1,ID=B16_451-4	NA	NA
Fam46a	chr9	85320439	85327348	-	3	1.44928	0.0156099	0.0718572	1 [1,0]	2 [0,2]	1	ID=B16_464-2,ID=B16_485-4,ID=B16_462-4	NA	NA
AC136640.1	chr12	101216840	101373116	+	6	2.89855	0.0157959	0.0726756	6 [1,5]	0 [0,0]	1	ID=B16_463-1,ID=B16_488-3,ID=B16_474-3,ID=B16_474-4,ID=B16_484-4,ID=B16_474-2	NA	NA
Crtac1	chr19	42283037	42431783	-	2	0.966184	0.0158984	0.0730718	2 [1,1]	0 [0,0]	1	ID=EL4_60-2,ID=B16_487-2	NA	NA
Ext2	chr2	93661028	93822549	-	3	1.44928	0.0159545	0.073292	3 [2,1]	0 [0,0]	1	ID=B16_464-1,ID=B16_498-1,ID=EL4_72-3	NA	NA
Lama4	chr10	38965515	39110188	+	5	2.41546	0.016017	0.073541	5 [3,2]	0 [0,0]	1	ID=B16_464-2,ID=B16_485-1,ID=B16_450-1,ID=B16_489-1,ID=B16PD1_163-3	NA	NA
Cfap54	chr10	92775619	93081618	-	14	6.76329	0.0161104	0.0738941	14 [7,7]	0 [0,0]	1	ID=B16_464-2,ID=B16_487-4,ID=B16_498-1,ID=B16_502-3,ID=B16_474-3,ID=B16_474-4,ID=EL4_32_3,ID=B16_525-2,ID=B16_485-4,ID=B16_499-1,ID=B16_453-2,ID=B16_462-4,ID=EL4_65-1,ID=EL4_62-1	NA	NA
Slc5a9	chr4	111875375	111902918	-	6	2.89855	0.0161352	0.0739697	4 [3,1]	2 [1,1]	1	ID=B16_487-2,ID=B16_474-4,ID=B16_497-1,ID=B16_451-3,ID=EL4_47-1,ID=EL4_61-2	NA	NA
Alkbh8	chr9	3335478	3391154	+	12	5.7971	0.0162185	0.0742369	11 [8,3]	1 [1,0]	1	ID=B16_3-4,ID=B16_450-1,ID=B16_502-3,ID=B16_474-3,ID=B16_497-1,ID=EL4_34_5,ID=B16_485-4,ID=B16_449-4,ID=B16_451-5,ID=B16_451-3,ID=B16_474-1,ID=B16_499-2	NA	NA
Galnt12	chr4	47091909	47123070	+	6	2.89855	0.0162046	0.0742369	6 [1,5]	0 [0,0]	1	ID=B16_464-2,ID=B16_474-4,ID=B16_489-1,ID=B16_462-4,ID=B16_499-2,ID=B16_491-3	NA	NA
Olfr433	chr1	174040705	174044411	+	3	1.44928	0.016213	0.0742369	0 [0,0]	3 [2,1]	1	ID=B16_463-1,ID=B16_464-1,ID=EL4_72-3	NA	NA
Col4a3bp	chr13	96542735	96640167	+	3	1.44928	0.0162626	0.0744006	3 [2,1]	0 [0,0]	1	ID=B16_464-1,ID=B16_502-3,ID=B16PD1_160-3	NA	NA
Htr4	chr18	62324204	62467802	+	5	2.41546	0.0162764	0.0744256	5 [2,3]	0 [0,0]	1	ID=B16_463-1,ID=EL4_28_2,ID=B16_474-3,ID=EL4PD1_150-2,ID=B16_491-3	NA	NA
Epb41l3	chr17	69156810	69289989	+	3	1.44928	0.0163249	0.0746091	2 [2,0]	1 [1,0]	1	ID=B16_502-1,ID=B16_489-1,ID=B16_451-5	NA	NA
Trim2	chr3	84160439	84304809	-	3	1.44928	0.0164377	0.0750476	3 [1,2]	0 [0,0]	1	ID=B16_464-1,ID=EL4_67-2,ID=B16_449-4	NA	NA
Nek10	chr14	14820815	15006693	+	7	3.38164	0.0165096	0.0753374	6 [5,1]	1 [0,1]	1	ID=B16_463-1,ID=B16_488-3,ID=B16_464-1,ID=B16_474-5,ID=EL4_36_3,ID=B16_450-3,ID=B16_499-1	NA	NA
Atp2c1	chr9	105403539	105521147	-	19	9.17874	0.0165572	0.0755157	19 [11,8]	0 [0,0]	0.951198	ID=EL4_28_1,ID=EL4_28_2,ID=EL4_28_3,ID=EL4_26_4,ID=B16_464-2,ID=EL4PD1_116-3,ID=EL4_18_2,ID=EL4_32_1,ID=B16PD1_537_2,ID=B16_474-3,ID=B16_474-4,ID=EL4_59-1,ID=EL4_32_2,ID=EL4_52-5,ID=B16_489-1,ID=EL4_70-2,ID=EL4_24_1,ID=B16_462-4,ID=EL4_29_2	NA	NA
Zdhhc15	chrX	104536969	104671064	-	5	2.41546	0.016649	0.0758955	5 [5,0]	0 [0,0]	1	ID=B16_488-3,ID=B16_464-2,ID=B16_485-1,ID=EL4_48-4,ID=EL4_48-1	NA	NA
Itga2	chr13	114835916	114932041	-	2	0.966184	0.016664	0.0759252	1 [1,0]	1 [0,1]	1	ID=B16_463-1,ID=EL4_36_4	NA	NA
Olfr955	chr9	39465801	39471944	-	4	1.93237	0.0166794	0.0759567	2 [2,0]	2 [0,2]	1	ID=B16_485-3,ID=B16_460-1,ID=B16_474-4,ID=B16_484-2	NA	NA
Syncrip	chr9	88447009	88482559	-	9	4.34783	0.0167161	0.0760847	9 [5,4]	0 [0,0]	1	ID=B16_463-1,ID=B16_488-3,ID=B16_485-2,ID=B16_474-3,ID=B16_474-4,ID=B16_497-1,ID=B16_489-1,ID=B16_449-4,ID=B16_462-4	NA	NA
Mapkap1	chr2	34407183	34624949	+	8	3.86473	0.0167813	0.0763427	8 [5,3]	0 [0,0]	1	ID=B16_488-3,ID=B16_464-1,ID=B16_502-3,ID=B16_474-3,ID=B16_450-3,ID=B16_499-1,ID=B16_462-4,ID=B16_491-3	NA	NA
Topors	chr4	40259601	40269850	-	4	1.93237	0.0167901	0.0763436	3 [1,2]	1 [0,1]	1	ID=B16_502-3,ID=B16_474-3,ID=B16_450-3,ID=B16_475-2	NA	NA
Acnat1	chr4	49450966	49473912	-	6	2.89855	0.0168383	0.0765236	5 [1,4]	1 [0,1]	1	ID=EL4_60-2,ID=B16_474-4,ID=B16_489-1,ID=B16_450-3,ID=B16_451-3,ID=EL4_47-2	NA	NA
Twist2	chr1	91801461	91848028	+	7	3.38164	0.0168522	0.0765478	7 [4,3]	0 [0,0]	1	ID=B16_463-1,ID=B16_464-1,ID=B16_487-4,ID=B16_450-1,ID=B16PD1_537_1,ID=B16_486-3,ID=B16_489-1	NA	NA
Zbtb7c	chr18	75820178	76148561	+	11	5.31401	0.0169249	0.0766826	11 [6,5]	0 [0,0]	1	ID=B16_464-2,ID=B16_464-1,ID=B16_498-1,ID=B16_474-4,ID=B16_489-1,ID=B16_450-3,ID=B16_499-1,ID=B16_451-3,ID=EL4_62-1,ID=B16_499-2,ID=B16_491-3	NA	NA
Smg7	chr1	152836995	152902622	-	13	6.28019	0.0169389	0.0767071	12 [6,6]	1 [1,0]	1	ID=B16_464-1,ID=B16_450-1,ID=B16_502-3,ID=B16_474-3,ID=EL4_55-2,ID=EL4_67-2,ID=B16_2-2,ID=B16_1-1,ID=B16_499-1,ID=LLC_174-2,ID=B16_474-1,ID=B16_499-2,ID=B16_491-2	NA	NA
Gpatch3	chr4	133574745	133584243	+	3	1.44928	0.016988	0.0768905	3 [2,1]	0 [0,0]	1	ID=B16_464-2,ID=B16_498-2,ID=B16_502-3	NA	NA
Olfr951	chr9	39387410	39395633	+	5	2.41546	0.0170042	0.0769247	4 [1,3]	1 [1,0]	1	ID=B16_474-3,ID=B16_474-4,ID=B16_497-1,ID=B16_462-4,ID=B16_491-3	NA	NA
Slc22a22	chr15	57243771	57477625	-	12	5.7971	0.017075	0.0771663	12 [4,8]	0 [0,0]	1	ID=B16_463-1,ID=EL4_60-1,ID=B16_485-1,ID=B16_502-3,ID=EL4_27_3,ID=EL4_64-1,ID=EL4_36_2,ID=B16_489-1,ID=B16_450-3,ID=EL4_62-1,ID=B16_474-1,ID=LLC_170-1	NA	NA
Rgs17	chr10	5825663	5922400	-	2	0.966184	0.0170739	0.0771663	2 [2,0]	0 [0,0]	1	ID=B16_4-2,ID=B16_484-2	NA	NA
Hoxb7	chr11	96286623	96290162	+	2	0.966184	0.0171523	0.0774765	0 [0,0]	2 [0,2]	1	ID=B16_485-1,ID=B16_486-3	NA	NA
Eloc	chr1	16641725	16656884	-	5	2.41546	0.0171793	0.0775592	5 [4,1]	0 [0,0]	1	ID=B16_463-1,ID=B16_489-1,ID=B16_450-3,ID=B16_499-1,ID=B16_515-1	NA	NA
Spink13	chr18	62607539	62741387	-	4	1.93237	0.0171956	0.0775937	4 [3,1]	0 [0,0]	1	ID=B16_502-3,ID=B16PD1_537_1,ID=B16PD1_531_2,ID=B16_2-2	NA	NA
Bhlhb9	chrX	135797594	135890864	+	2	0.966184	0.0172352	0.0777328	2 [2,0]	0 [0,0]	1	ID=B16_502-3,ID=B16_462-4	NA	NA
Map3k15	chrX	159988433	160123351	+	5	2.41546	0.0172548	0.0777424	5 [4,1]	0 [0,0]	1	ID=B16_463-1,ID=EL4_28_4,ID=B16_487-4,ID=B16_450-1,ID=B16_485-4	NA	NA
Rspo3	chr10	29452418	29535867	-	2	0.966184	0.0172487	0.0777424	2 [0,2]	0 [0,0]	1	ID=B16_464-2,ID=B16_460-1	NA	NA
Iqch	chr9	63421455	63602493	-	7	3.38164	0.0172902	0.0778629	5 [1,4]	2 [0,2]	1	ID=B16_488-3,ID=B16_464-1,ID=B16_460-1,ID=B16PD1_532_2,ID=EL4_36_3,ID=EL4PD1_156-3,ID=B16_484-1	NA	NA
Pdzrn4	chr15	92396915	92771819	+	21	10.1449	0.0173037	0.0778843	21 [10,11]	0 [0,0]	1	ID=B16_463-1,ID=EL4_28_4,ID=B16_455-1,ID=B16_488-3,ID=B16_464-2,ID=B16_464-1,ID=EL4_22_3,ID=B16PD1_537_4,ID=B16_474-3,ID=B16_474-4,ID=B16_474-5,ID=EL4PD1_150-3,ID=B16_2-2,ID=B16_1-2,ID=B16_499-1,ID=B16_451-3,ID=B16_484-4,ID=B16_484-2,ID=B16_451-4,ID=B16_515-1,ID=B16_491-3	NA	NA
Greb1l	chr18	10325179	10562934	+	11	5.31401	0.0174188	0.0782935	10 [7,3]	1 [-1,2]	0.997708	ID=EL4_41-1,ID=B16_464-1,ID=B16_519-1,ID=B16_474-4,ID=B16_489-1,ID=B16_450-3,ID=B16_499-1,ID=B16_518-1,ID=B16_462-4,ID=LLC_174-1,ID=EL4PD1_152-1	NA	NA
AC151843.2	chr10	92223004	92223474	-	2	0.966184	0.017421	0.0782935	0 [0,0]	2 [0,2]	1	ID=B16_463-1,ID=B16_462-4	NA	NA
Anp32b-ps1	chr4	143389659	143390416	+	2	0.966184	0.017421	0.0782935	0 [0,0]	2 [2,0]	1	ID=EL4_49-1,ID=B16_491-3	NA	NA
Lcorl	chr5	45697181	45857615	-	8	3.86473	0.0174392	0.078336	8 [4,4]	0 [0,0]	1	ID=B16_464-2,ID=B16_464-1,ID=B16_487-4,ID=B16_498-1,ID=LLC_172-2,ID=B16_449-4,ID=LLC_174-1,ID=B16_491-3	NA	NA
Cux1	chr5	136248135	136567264	-	12	5.7971	0.0174756	0.0784597	11 [10,1]	1 [0,1]	1	ID=B16_488-3,ID=B16_464-1,ID=B16_485-1,ID=B16_502-3,ID=B16_474-3,ID=EL4_55-2,ID=B16_454-3,ID=B16_450-3,ID=B16_499-1,ID=B16_453-2,ID=B16_462-4,ID=EL4_65-1	NA	NA
Acot12	chr13	91741512	91786148	+	9	4.34783	0.0174902	0.0784857	9 [4,5]	0 [0,0]	1	ID=EL4_28_1,ID=EL4_28_3,ID=EL4_26_4,ID=B16_498-2,ID=B16PD1_537_1,ID=EL4_27_3,ID=EL4_32_2,ID=EL4_64-2,ID=EL4_24_1	NA	NA
Rgs7	chr1	175059087	175492500	-	26	12.5604	0.0175106	0.078498	26 [16,10]	0 [0,0]	0.999967	ID=B16_463-1,ID=EL4_28_4,ID=B16_488-3,ID=B16_464-1,ID=B16_487-4,ID=B16_487-2,ID=B16_498-1,ID=LLC_172-2,ID=EL4_45-1,ID=B16_474-3,ID=B16_474-5,ID=B16_497-1,ID=B16_486-3,ID=EL4_55-2,ID=B16_525-2,ID=EL4_52-5,ID=EL4PD1_119-4,ID=B16_489-1,ID=B16_499-1,ID=B16_462-4,ID=EL4_65-1,ID=B16PD1_160-3,ID=B16_474-1,ID=B16_484-1,ID=B16_484-2,ID=B16_499-2	NA	NA
Sel1l2	chr2	140229855	140389704	-	6	2.89855	0.0175075	0.078498	6 [2,4]	0 [0,0]	1	ID=B16_463-1,ID=B16PD1_534_3,ID=B16_488-3,ID=B16_464-2,ID=B16_487-4,ID=B16_13-1	NA	NA
Atp9b	chr18	80734143	80934058	-	9	4.34783	0.0175706	0.0787276	9 [5,4]	0 [0,0]	0.902616	ID=B16_463-1,ID=B16_498-2,ID=B16_460-1,ID=B16_474-3,ID=B16_489-1,ID=B16_499-1,ID=B16_462-4,ID=LLC_174-1,ID=B16_491-3	NA	NA
Zfp335	chr2	164891882	164911757	-	4	1.93237	0.0176934	0.0791982	4 [3,1]	0 [0,0]	1	ID=B16_455-1,ID=B16_456-4,ID=B16_498-2,ID=B16_525-2	NA	NA
Lonp2	chr8	86624043	86723873	+	2	0.966184	0.0177701	0.0794615	2 [1,1]	0 [0,0]	1	ID=B16_502-3,ID=B16_499-1	NA	NA
Tox4	chr14	52279146	52296391	+	5	2.41546	0.0178019	0.079564	5 [2,3]	0 [0,0]	0.937609	ID=B16_463-1,ID=B16_464-2,ID=B16_485-1,ID=B16_486-3,ID=B16_499-1	NA	NA
Uty	chrY	1096861	1245691	-	7	3.38164	0.0178551	0.0797218	7 [3,4]	0 [0,0]	1	ID=EL4_28_4,ID=B16_464-1,ID=B16_489-1,ID=B16_499-1,ID=B16_451-5,ID=B16_451-3,ID=B16_475-2	NA	NA
Cdh6	chr15	13034200	13173639	-	4	1.93237	0.0178489	0.0797218	4 [2,2]	0 [0,0]	1	ID=B16_463-1,ID=B16_464-2,ID=B16_487-4,ID=B16_502-3	NA	NA
Cmya5	chr13	93040713	93144724	-	2	0.966184	0.0179379	0.0799772	2 [1,1]	0 [0,0]	1	ID=B16_498-2,ID=B16_499-1	NA	NA
Rps2-ps10	chr18	61259008	61259972	-	2	0.966184	0.0179662	0.0799772	0 [0,0]	2 [0,2]	1	ID=EL4_34_5,ID=B16PD1_531_2	NA	NA
AC159747.1	chr10	78699609	78699873	+	2	0.966184	0.0179662	0.0799772	0 [0,0]	2 [1,1]	0.500891	ID=B16_488-3,ID=EL4_72-3	NA	NA
Cnot2	chr10	116485161	116581511	-	3	1.44928	0.0180995	0.0804503	3 [2,1]	0 [0,0]	1	ID=B16_463-1,ID=B16_449-4,ID=B16_13-3	NA	NA
Tcf7l1	chr6	72626378	72789254	-	3	1.44928	0.0181272	0.0805332	3 [0,3]	0 [0,0]	1	ID=B16_474-4,ID=B16_489-1,ID=B16_484-2	NA	NA
Sh3gl2	chr4	85205469	85639195	+	52	25.1208	0.0181384	0.0805429	52 [26,26]	0 [0,0]	0.999936	ID=EL4PD1_116-2,ID=B16_463-1,ID=B16_488-3,ID=B16_464-2,ID=B16_464-1,ID=B16_485-1,ID=B16_487-4,ID=B16_485-3,ID=B16_487-2,ID=B16_450-1,ID=B16_502-3,ID=B16_502-1,ID=EL4_49-1,ID=B16_460-1,ID=EL4_70-1,ID=B16_485-2,ID=B16_474-3,ID=B16_474-4,ID=B16_16-4,ID=B16_497-1,ID=EL4_48-4,ID=EL4PD1_114-1,ID=B16_486-3,ID=B16_485-4,ID=EL4_52-5,ID=EL4_36_3,ID=B16_489-1,ID=B16_450-3,ID=B16_449-4,ID=B16_522-1,ID=B16_45…	NA	NA
Snrpn	chr7	59982502	60140219	-	8	3.86473	0.0181963	0.0806839	8 [6,2]	0 [0,0]	1	ID=B16_463-1,ID=B16_456-4,ID=B16_498-1,ID=EL4_46-2,ID=B16_486-3,ID=EL4_64-1,ID=B16_489-1,ID=B16_462-4	NA	NA
Atad2b	chr12	4917404	5047394	+	5	2.41546	0.0182236	0.0806839	5 [4,1]	0 [0,0]	1	ID=B16_463-1,ID=EL4PD1_116-3,ID=EL4PD1_114-1,ID=B16_489-1,ID=EL4_47-2	NA	NA
Scgb1b1-ps	chr7	31255891	31256277	-	2	0.966184	0.0182426	0.0806839	0 [0,0]	2 [2,0]	1	ID=EL4_32_1,ID=EL4_29_2	NA	NA
Scgb1b5-ps	chr7	31507441	31507834	+	2	0.966184	0.0182426	0.0806839	0 [0,0]	2 [2,0]	1	ID=EL4_28_4,ID=EL4_22_3	NA	NA
Trbv13-2	chr6	41121396	41121832	+	2	0.966184	0.0182426	0.0806839	0 [0,0]	2 [0,2]	1	ID=B16_464-1,ID=B16_487-4	NA	NA
Lin7a	chr10	107271686	107421474	+	6	2.89855	0.0182592	0.0807174	6 [3,3]	0 [0,0]	0.857389	ID=B16_464-1,ID=B16_502-3,ID=B16_474-3,ID=B16_499-1,ID=B16_484-1,ID=B16_474-2	NA	NA
Zic4	chr9	91368970	91387793	+	4	1.93237	0.0183921	0.0812644	2 [1,1]	2 [0,2]	1	ID=EL4_60-1,ID=B16_450-1,ID=B16_474-4,ID=B16_485-4	NA	NA
Olfr872	chr9	20237119	20261643	+	7	3.38164	0.0184292	0.0813294	6 [3,3]	1 [1,0]	1	ID=B16_464-2,ID=B16_485-3,ID=B16_474-3,ID=B16_474-4,ID=B16_497-1,ID=B16_484-1,ID=B16_491-3	NA	NA
Pcdh19	chrX	133582860	133688987	-	3	1.44928	0.0184202	0.0813294	2 [1,1]	1 [0,1]	1	ID=B16_463-1,ID=B16_464-2,ID=B16_462-4	NA	NA
Gsap	chr5	21186267	21291701	+	2	0.966184	0.0184366	0.0813294	2 [0,2]	0 [0,0]	1	ID=B16_464-2,ID=B16_474-4	NA	NA
Fer1l6	chr15	58510048	58662933	+	4	1.93237	0.0184575	0.0813516	4 [4,0]	0 [0,0]	1	ID=B16_487-4,ID=B16_487-2,ID=EL4_36_2,ID=B16_474-1	NA	NA
Mtus1	chr8	40990914	41133726	-	4	1.93237	0.018485	0.0814326	4 [4,0]	0 [0,0]	1	ID=EL4_41-1,ID=B16_485-1,ID=EL4_64-5,ID=B16_489-1	NA	NA
Htr1f	chr16	64924729	65105784	-	8	3.86473	0.0185357	0.0815353	8 [4,4]	0 [0,0]	1	ID=B16_463-1,ID=EL4_18_2,ID=B16_460-1,ID=B16_474-3,ID=B16_474-4,ID=B16_451-3,ID=B16_474-1,ID=B16_499-2	NA	NA
Ppp3ca	chr3	136670124	136937727	+	13	6.28019	0.0185512	0.0815631	13 [3,10]	0 [0,0]	0.945115	ID=B16_463-1,ID=B16_488-3,ID=EL4_63-1,ID=B16_464-1,ID=B16_474-3,ID=B16_474-4,ID=B16_489-1,ID=B16_451-5,ID=B16_462-4,ID=LLC_174-1,ID=EL4_62-1,ID=B16_499-2,ID=B16_491-3	NA	NA
Fktn	chr4	53714163	53777890	+	12	5.7971	0.018596	0.0816401	12 [5,7]	0 [0,0]	1	ID=B16_463-1,ID=B16_455-1,ID=B16_488-3,ID=B16_464-2,ID=B16_502-3,ID=B16_460-1,ID=B16_474-4,ID=EL4_59-1,ID=B16_521-1,ID=B16_518-1,ID=B16_462-4,ID=B16_491-3	NA	NA
Clnk	chr5	38706462	38876812	-	5	2.41546	0.0185852	0.0816401	5 [3,2]	0 [0,0]	1	ID=B16_463-1,ID=EL4_18_2,ID=B16_489-1,ID=EL4_47-1,ID=B16_484-2	NA	NA
Epsti1	chr14	77904239	78002656	+	2	0.966184	0.0185962	0.0816401	2 [2,0]	0 [0,0]	1	ID=B16PD1_160-2,ID=B16_499-2	NA	NA
Plcg2	chr8	117498291	117635142	+	2	0.966184	0.01864	0.0817516	2 [1,1]	0 [0,0]	1	ID=B16_485-3,ID=B16_474-3	NA	NA
Alpk1	chr3	127670310	127780527	-	2	0.966184	0.0186692	0.0818395	2 [0,2]	0 [0,0]	1	ID=B16_485-1,ID=B16_499-2	NA	NA
Sfmbt1	chr14	30715615	30822713	+	3	1.44928	0.0187037	0.0819505	3 [2,1]	0 [0,0]	1	ID=B16_464-2,ID=EL4PD1_114-3,ID=B16_460-1	NA	NA
Lnpep	chr17	17527723	17624489	-	3	1.44928	0.0187752	0.0822235	3 [3,0]	0 [0,0]	1	ID=B16_474-4,ID=B16_451-5,ID=B16_462-4	NA	NA
Col22a1	chr15	71795795	72034227	-	9	4.34783	0.0188694	0.0825141	9 [4,5]	0 [0,0]	1	ID=EL4_41-1,ID=B16_488-3,ID=B16_464-2,ID=B16_464-1,ID=EL4_22_3,ID=B16_499-1,ID=B16_475-1,ID=EL4_47-1,ID=B16_499-2	NA	NA
Adcy5	chr16	35154877	35305737	+	2	0.966184	0.0188603	0.0825141	2 [1,1]	0 [0,0]	1	ID=B16_464-2,ID=B16_520-2	NA	NA
Mpp6	chr6	50110278	50198939	+	2	0.966184	0.0189047	0.0826279	2 [2,0]	0 [0,0]	1	ID=EL4_64-1,ID=B16_491-3	NA	NA
Inpp5a	chr7	139389109	139579652	+	4	1.93237	0.0189448	0.0827627	4 [0,4]	0 [0,0]	1	ID=B16_474-3,ID=B16_474-4,ID=B16_497-1,ID=B16_499-2	NA	NA
Birc6	chr17	74528295	74703356	+	8	3.86473	0.0189717	0.0828398	8 [5,3]	0 [0,0]	1	ID=B16_488-3,ID=B16_498-1,ID=B16_474-3,ID=B16_474-4,ID=B16_485-4,ID=B16_499-1,ID=B16_14-1,ID=EL4PD1_118-1	NA	human T-ALL driver
AC113082.1	chr9	24952973	24953299	+	2	0.966184	0.0190874	0.0831411	0 [0,0]	2 [1,1]	1	ID=B16_474-3,ID=EL4_62-1	NA	NA
Hmgb3-ps	chr14	9863102	9863702	+	2	0.966184	0.0190874	0.0831411	0 [0,0]	2 [0,2]	1	ID=B16_484-4,ID=B16_484-2	NA	NA
Olfr985	chr9	40126308	40130184	-	3	1.44928	0.0191152	0.0832216	3 [3,0]	0 [0,0]	1	ID=B16_484-2,ID=B16_499-2,ID=B16_491-3	NA	NA
Dnah9	chr11	65831282	66168533	-	17	8.21256	0.0192153	0.0836165	16 [7,9]	1 [0,1]	1	ID=B16_488-3,ID=B16_464-2,ID=B16_485-1,ID=B16_450-1,ID=B16_498-1,ID=B16_460-1,ID=B16PD1_537_4,ID=B16_474-3,ID=B16_474-4,ID=B16_485-4,ID=EL4_36_4,ID=B16_489-1,ID=B16_450-3,ID=B16_499-1,ID=B16_451-3,ID=B16_462-4,ID=B16_499-2	NA	NA
6030498E09Rik	chrX	38772671	38962686	+	9	4.34783	0.0192919	0.0838682	9 [5,4]	0 [0,0]	1	ID=EL4_28_1,ID=B16_464-2,ID=B16_464-1,ID=B16_502-3,ID=EL4_49-1,ID=EL4_24_1,ID=B16_462-4,ID=B16PD1_160-3,ID=EL4PD1_152-2	NA	NA
Baz1a	chr12	54892989	54986336	-	2	0.966184	0.0193239	0.083966	2 [2,0]	0 [0,0]	1	ID=B16_464-2,ID=B16_502-3	NA	NA
Srpk2	chr5	23505452	23676448	-	6	2.89855	0.0193972	0.0841205	6 [3,3]	0 [0,0]	1	ID=B16_498-1,ID=EL4_45-1,ID=B16_474-4,ID=B16_489-1,ID=B16_484-2,ID=B16_499-2	NA	NA
Phkb	chr8	85841002	86061376	+	11	5.31401	0.0194074	0.0841239	9 [4,5]	2 [0,2]	1	ID=EL4PD1_116-2,ID=EL4PD1_114-3,ID=B16_498-1,ID=B16_502-3,ID=B16_460-1,ID=B16_474-3,ID=B16_474-4,ID=EL4_36_4,ID=B16_499-1,ID=B16_491-3,ID=B16_491-2	NA	NA
Med14	chrX	12675369	12762073	-	2	0.966184	0.0194453	0.0842474	2 [1,1]	0 [0,0]	1	ID=B16_460-1,ID=EL4_59-1	NA	NA
Dusp26	chr8	31089471	31097047	+	3	1.44928	0.019457	0.0842569	1 [0,1]	2 [1,1]	1	ID=B16_464-1,ID=B16_489-1,ID=B16_451-5	NA	NA
Olfr836	chr9	19120382	19125938	+	4	1.93237	0.0194746	0.0842924	3 [2,1]	1 [0,1]	1	ID=B16_485-1,ID=B16_497-1,ID=B16_462-4,ID=EL4PD1_152-1	NA	NA
Minos1	chr4	139101814	139131113	-	6	2.89855	0.0195505	0.0845798	5 [2,3]	1 [1,0]	1	ID=B16_460-1,ID=B16_485-2,ID=B16_485-4,ID=B16_450-3,ID=B16_451-3,ID=B16_491-2	NA	NA
Dtna	chr18	23415442	23659715	+	12	5.7971	0.0198164	0.0856467	12 [7,5]	0 [0,0]	1	ID=B16_463-1,ID=B16_101NT-3,ID=B16_464-2,ID=B16_464-1,ID=B16_498-2,ID=B16_502-1,ID=EL4PD1_150-2,ID=EL4PD1_157-2,ID=B16_462-4,ID=B16_474-1,ID=B16_484-2,ID=EL4_72-3	NA	NA
AC161256.2	chr9	78765388	78765600	-	2	0.966184	0.0199555	0.0860808	0 [0,0]	2 [1,1]	1	ID=B16_474-4,ID=B16_491-3	NA	NA
Skap2	chr6	51857422	52012549	-	7	3.38164	0.0200164	0.0863018	7 [4,3]	0 [0,0]	1	ID=B16_463-1,ID=B16_464-2,ID=B16_487-2,ID=B16_474-3,ID=EL4_36_3,ID=EL4_54-2,ID=B16_499-2	NA	NA
Fancl	chr11	26386135	26471876	+	2	0.966184	0.0200328	0.0863307	2 [1,1]	0 [0,0]	1	ID=B16_485-1,ID=EL4_65-1	NA	NA
Olfr150	chr9	39730978	39738456	+	4	1.93237	0.0200942	0.0865536	2 [0,2]	2 [1,1]	1	ID=B16_464-2,ID=B16_460-1,ID=B16_5-2,ID=B16_462-4	NA	NA
Nox1	chrX	134107733	134221956	-	3	1.44928	0.0201866	0.0869097	3 [2,1]	0 [0,0]	1	ID=EL4PD1_114-3,ID=EL4_67-2,ID=B16_451-3	NA	NA
Olfr914	chr9	38605102	38610978	+	4	1.93237	0.0202196	0.0870099	3 [3,0]	1 [0,1]	1	ID=B16_474-4,ID=B16_499-1,ID=B16_462-4,ID=B16_491-3	NA	NA
AC157353.1	chr12	97677055	97677541	-	2	0.966184	0.02025	0.0870145	0 [0,0]	2 [0,2]	1	ID=B16PD1_534_1,ID=B16_487-2	NA	NA
Efcab5	chr11	77089915	77188968	-	2	0.966184	0.0204128	0.0876719	2 [2,0]	0 [0,0]	1	ID=B16_488-3,ID=EL4_32_3	NA	NA
Prr16	chr18	51117898	51304641	+	10	4.83092	0.0205194	0.088082	10 [6,4]	0 [0,0]	1	ID=B16_463-1,ID=B16_464-2,ID=B16_464-1,ID=B16_502-3,ID=B16_460-1,ID=B16_485-2,ID=EL4PD1_157-1,ID=B16_489-1,ID=B16_499-1,ID=B16_462-4	NA	NA
Gng12	chr6	66896397	67021350	+	3	1.44928	0.0205281	0.088082	3 [1,2]	0 [0,0]	1	ID=B16PD1_534_3,ID=B16_488-3,ID=B16_474-1	NA	NA
Atg7	chr6	114643097	114860614	+	6	2.89855	0.0206618	0.088613	5 [3,2]	1 [0,1]	1	ID=B16_485-3,ID=B16_460-1,ID=B16_497-1,ID=B16_451-3,ID=B16_462-4,ID=LLC_174-1	NA	NA
Abi2	chr1	60409619	60481158	+	14	6.76329	0.020687	0.0886786	14 [7,7]	0 [0,0]	1	ID=B16_463-1,ID=B16_3-4,ID=B16_464-2,ID=B16_464-1,ID=B16_498-1,ID=B16_502-3,ID=B16PD1_533_3,ID=B16PD1_537_4,ID=B16PD1_537_2,ID=B16_16-2,ID=B16PD1_531_1,ID=B16_454-3,ID=EL4_36_3,ID=B16_499-1	NA	NA
Hnrnpu	chr1	178323074	178337728	-	5	2.41546	0.0208487	0.0891999	5 [5,0]	0 [0,0]	1	ID=B16_464-1,ID=B16_487-4,ID=B16_497-1,ID=B16_450-3,ID=B16_484-1	NA	NA
AC107819.1	chr9	56021340	56022174	+	2	0.966184	0.0208469	0.0891999	0 [0,0]	2 [0,2]	0.668363	ID=EL4_63-1,ID=B16_474-2	NA	NA
Synpo2	chr3	123076519	123236147	-	5	2.41546	0.0208746	0.089268	5 [1,4]	0 [0,0]	1	ID=B16_502-3,ID=B16_499-1,ID=B16_462-4,ID=B16_499-2,ID=B16_515-2	NA	NA
Senp7	chr16	56075409	56190011	+	4	1.93237	0.0209449	0.0895256	4 [4,0]	0 [0,0]	1	ID=EL4_28_2,ID=EL4_52-5,ID=B16_489-1,ID=B16_462-4	NA	NA
Acvr1c	chr2	58267453	58357895	-	2	0.966184	0.0210129	0.0897731	2 [1,1]	0 [0,0]	1	ID=B16_498-1,ID=B16_491-3	NA	NA
Hecw2	chr1	53806882	54195034	-	22	10.628	0.0210789	0.0899688	22 [13,9]	0 [0,0]	1	ID=B16_463-1,ID=EL4_28_4,ID=EL4_28_2,ID=B16_464-1,ID=B16_485-1,ID=B16_498-1,ID=B16_502-3,ID=EL4_45-1,ID=B16PD1_533_1,ID=B16_474-4,ID=B16_486-3,ID=EL4_33_2,ID=EL4_67-2,ID=EL4_36_4,ID=EL4_36_3,ID=B16_489-1,ID=B16_499-1,ID=B16_451-3,ID=B16_462-4,ID=EL4_44-2,ID=B16_499-2,ID=B16_491-3	NA	NA
AC158992.1	chr9	69792604	69793151	-	2	0.966184	0.0211493	0.0901398	1 [0,1]	1 [0,1]	1	ID=B16_450-3,ID=B16_462-4	NA	NA
Ighv8-1	chr12	114332796	114333086	-	2	0.966184	0.0211493	0.0901398	0 [0,0]	2 [1,1]	1	ID=B16_485-3,ID=B16_462-4	NA	NA
Tmem64	chr4	15265831	15286753	+	6	2.89855	0.021268	0.0905848	4 [2,2]	2 [1,1]	1	ID=B16_464-2,ID=B16_502-3,ID=B16_460-1,ID=B16_474-4,ID=B16_489-1,ID=EL4PD1_118-2	NA	NA
Cdyl2	chr8	116574400	116732991	-	4	1.93237	0.021274	0.0905848	4 [3,1]	0 [0,0]	1	ID=EL4PD1_116-2,ID=B16_463-1,ID=B16_474-4,ID=EL4_67-2	NA	NA
Bicc1	chr10	70922832	71159700	-	9	4.34783	0.0213001	0.0906526	9 [3,6]	0 [0,0]	1	ID=B16_463-1,ID=B16_464-2,ID=B16_464-1,ID=B16_487-4,ID=B16_485-2,ID=B16_474-4,ID=B16_499-1,ID=B16_462-4,ID=B16_474-1	NA	NA
Sntb1	chr15	55638843	55906949	-	13	6.28019	0.0213489	0.0907723	13 [3,10]	0 [0,0]	1	ID=B16_488-3,ID=EL4PD1_116-1,ID=B16_464-1,ID=B16_460-1,ID=B16_474-3,ID=B16_497-2,ID=EL4_64-1,ID=B16_489-1,ID=EL4_70-2,ID=B16_451-3,ID=B16_462-4,ID=EL4PD1_117-3,ID=EL4PD1_119-1	NA	NA
Tmem245	chr4	56866923	56947437	-	13	6.28019	0.0213614	0.0907723	13 [9,4]	0 [0,0]	1	ID=B16_488-3,ID=B16_464-2,ID=B16_464-1,ID=B16_485-3,ID=B16_474-5,ID=B16_497-1,ID=B16_475-2,ID=EL4_62-1,ID=B16_484-1,ID=B16_484-2,ID=B16_491-3,ID=B16_491-2,ID=B16_474-2	NA	NA
Arsb	chr13	93771630	93943016	+	5	2.41546	0.0213488	0.0907723	5 [1,4]	0 [0,0]	1	ID=B16_464-1,ID=B16_474-4,ID=EL4_67-2,ID=EL4_62-1,ID=B16_499-2	NA	NA
Rai14	chr15	10568979	10714631	-	4	1.93237	0.021369	0.0907723	4 [1,3]	0 [0,0]	1	ID=B16_474-4,ID=EL4_55-2,ID=B16_499-1,ID=EL4_44-2	NA	NA
Ccdc34	chr2	110017962	110173360	+	6	2.89855	0.0213915	0.0908248	6 [4,2]	0 [0,0]	1	ID=B16_463-1,ID=B16_488-3,ID=B16_487-2,ID=EL4_27_3,ID=EL4_34_5,ID=EL4_54-2	NA	NA
Ankhd1	chr18	36560678	36665917	+	4	1.93237	0.0214325	0.0909554	4 [2,2]	0 [0,0]	1	ID=B16_463-1,ID=B16_498-1,ID=EL4_34_5,ID=B16_484-2	NA	NA
Nup93	chr8	94214601	94315066	+	2	0.966184	0.0215123	0.0912072	2 [2,0]	0 [0,0]	1	ID=EL4PD1_150-2,ID=EL4_54-2	NA	NA
Angptl3	chr4	99033203	99046111	+	5	2.41546	0.0215601	0.0913662	4 [1,3]	1 [1,0]	0.801682	ID=B16_502-3,ID=B16_502-1,ID=B16_474-4,ID=B16_489-1,ID=B16_462-4	NA	NA
Cntnap3	chr13	64736182	64903955	-	8	3.86473	0.0215938	0.0914222	8 [3,5]	0 [0,0]	1	ID=B16_463-1,ID=EL4_60-2,ID=B16_464-2,ID=B16_474-3,ID=B16_474-4,ID=B16_485-4,ID=B16_499-1,ID=B16_451-3	NA	NA
Ppfibp2	chr7	107595266	107744885	+	4	1.93237	0.0215921	0.0914222	3 [2,1]	1 [0,1]	1	ID=B16_488-3,ID=B16_464-2,ID=B16_464-1,ID=EL4PD1_150-2	NA	NA
Nnmt	chr9	48591877	48605153	-	4	1.93237	0.0216346	0.0915514	1 [0,1]	3 [0,3]	1	ID=B16_498-1,ID=B16_502-3,ID=B16_449-4,ID=B16_462-4	NA	NA
Klhl29	chr12	5077472	5375682	-	10	4.83092	0.021768	0.0918824	9 [8,1]	1 [0,1]	1	ID=B16_463-1,ID=B16_488-3,ID=B16_498-1,ID=B16_502-3,ID=B16_497-1,ID=B16_486-3,ID=B16_489-1,ID=B16_499-1,ID=B16_491-3,ID=B16_520-1	NA	NA
Mrps15	chr4	126046925	126055532	+	3	1.44928	0.0217746	0.0918824	2 [1,1]	1 [0,1]	1	ID=B16_460-1,ID=B16_474-5,ID=B16_462-4	NA	NA
Igkv1-35	chr6	70010949	70011673	-	2	0.966184	0.0217618	0.0918824	0 [0,0]	2 [2,0]	1	ID=B16_497-2,ID=B16_474-1	NA	NA
Rpl13a	chr7	45125558	45128761	-	2	0.966184	0.0217618	0.0918824	2 [0,2]	0 [0,0]	1	ID=B16_450-3,ID=B16_484-4	NA	NA
Mctp2	chr7	72077830	72306608	-	12	5.7971	0.0218587	0.0921695	11 [9,2]	1 [0,1]	0.997289	ID=B16_463-1,ID=B16_487-4,ID=B16_485-3,ID=B16_498-1,ID=B16PD1_537_1,ID=B16_474-3,ID=EL4_52-5,ID=B16_449-4,ID=B16_499-1,ID=B16_451-3,ID=EL4PD1_118-1,ID=EL4_61-2	NA	NA
Olfr27	chr9	39128132	39145072	+	6	2.89855	0.0218634	0.0921695	5 [1,4]	1 [0,1]	1	ID=B16_485-3,ID=B16_474-4,ID=EL4_59-1,ID=B16_462-4,ID=LLC_174-1,ID=B16_491-3	NA	NA
Cald1	chr6	34598500	34775454	+	6	2.89855	0.0219434	0.0924194	5 [3,2]	1 [1,0]	1	ID=B16_485-1,ID=B16_487-2,ID=B16_460-1,ID=B16_474-4,ID=B16_499-2,ID=B16_491-3	NA	NA
Col5a1	chr2	27886425	28039514	+	2	0.966184	0.0219375	0.0924194	2 [2,0]	0 [0,0]	1	ID=B16_460-1,ID=B16_484-2	NA	NA
Thada	chr17	84190056	84466196	-	12	5.7971	0.02197	0.0924877	12 [6,6]	0 [0,0]	1	ID=B16_464-2,ID=B16_464-1,ID=B16_487-4,ID=B16_487-2,ID=EL4_45-1,ID=B16_486-3,ID=B16_489-1,ID=B16_451-3,ID=EL4_65-1,ID=EL4PD1_152-2,ID=B16_484-1,ID=B16_491-2	NA	NA
Kif26b	chr1	178529125	178939200	+	18	8.69565	0.0220364	0.0927236	18 [7,11]	0 [0,0]	1	ID=EL4_41-1,ID=B16_463-1,ID=B16_464-2,ID=B16_464-1,ID=B16_487-2,ID=B16_498-1,ID=B16_460-1,ID=B16_474-4,ID=EL4PD1_114-1,ID=EL4_55-2,ID=EL4_67-2,ID=B16PD1_532_1,ID=EL4PD1_157-2,ID=B16_489-1,ID=B16_499-1,ID=EL4_44-2,ID=B16_484-1,ID=B16_491-3	NA	NA
AC158600.4	chr10	118340847	118343255	-	2	0.966184	0.022072	0.0927858	0 [0,0]	2 [2,0]	1	ID=EL4_55-2,ID=EL4PD1_156-4	NA	NA
Igkv12-67	chr6	69324177	69324652	-	2	0.966184	0.022072	0.0927858	1 [0,1]	1 [1,0]	1	ID=B16_464-2,ID=B16_464-1	NA	NA
Sdcbp	chr4	6365713	6408423	+	9	4.34783	0.0221145	0.0929206	8 [5,3]	1 [0,1]	1	ID=B16_464-1,ID=B16_450-1,ID=B16_474-3,ID=B16_474-4,ID=B16_497-1,ID=EL4_59-1,ID=B16_451-5,ID=B16_462-4,ID=B16_484-2	NA	NA
Amph	chr13	18948205	19150921	+	9	4.34783	0.0221694	0.0931072	9 [4,5]	0 [0,0]	1	ID=B16_455-1,ID=B16_464-2,ID=B16_498-1,ID=EL4_45-1,ID=B16_497-1,ID=EL4PD1_113-1,ID=B16_485-4,ID=EL4_44-2,ID=B16_491-3	NA	NA
Syn3	chr10	86055125	86498856	-	20	9.66184	0.0222143	0.0931643	20 [8,12]	0 [0,0]	1	ID=EL4_41-1,ID=B16_463-1,ID=EL4_28_4,ID=EL4_28_2,ID=EL4_28_3,ID=B16_464-2,ID=B16_485-1,ID=LLC_173-3,ID=EL4_32_1,ID=EL4_45-1,ID=B16_474-4,ID=EL4_55-2,ID=B16_450-3,ID=B16_499-1,ID=B16_451-5,ID=B16_462-4,ID=EL4_44-2,ID=B16_484-1,ID=EL4PD1_117-1,ID=B16_491-3	NA	NA
Asxl3	chr18	22345089	22530227	+	9	4.34783	0.0222137	0.0931643	9 [6,3]	0 [0,0]	1	ID=B16_463-1,ID=B16_464-2,ID=B16_502-3,ID=B16_474-3,ID=B16_449-4,ID=B16_499-1,ID=B16_462-4,ID=B16_484-4,ID=B16_499-2	NA	NA
Ankrd36	chr11	5569684	5689337	+	3	1.44928	0.022204	0.0931643	3 [0,3]	0 [0,0]	1	ID=B16_464-1,ID=EL4PD1_116-3,ID=B16_462-4	NA	NA
Wdr1	chr5	38526813	38561806	-	6	2.89855	0.0222957	0.0934175	6 [1,5]	0 [0,0]	1	ID=EL4PD1_114-1,ID=EL4PD1_115-2,ID=LLC_169-2,ID=EL4PD1_117-3,ID=EL4_72-3,ID=B16_499-2	NA	NA
Hmgb1	chr5	149048793	149184489	-	3	1.44928	0.0222887	0.0934175	3 [1,2]	0 [0,0]	1	ID=B16_488-3,ID=B16_464-2,ID=B16_464-1	NA	NA
Rnf217	chr10	31493193	31609184	-	4	1.93237	0.0223581	0.0935958	4 [1,3]	0 [0,0]	1	ID=B16_464-2,ID=B16_487-4,ID=B16_474-3,ID=B16_521-2	NA	NA
Osbp2	chr11	3703731	3863903	-	3	1.44928	0.0223907	0.0935958	3 [2,1]	0 [0,0]	1	ID=B16_463-1,ID=B16_498-1,ID=B16_450-3	NA	NA
AC124744.2	chr13	3298887	3299667	+	2	0.966184	0.0223849	0.0935958	0 [0,0]	2 [1,1]	1	ID=B16_464-2,ID=EL4PD1_113-1	NA	NA
AC158600.3	chr10	118346271	118348679	-	2	0.966184	0.0223849	0.0935958	2 [2,0]	0 [0,0]	1	ID=EL4_55-2,ID=EL4PD1_156-4	NA	NA
Cnnm2	chr19	46761596	46878795	+	2	0.966184	0.022371	0.0935958	2 [1,1]	0 [0,0]	1	ID=B16_485-3,ID=B16_460-1	NA	NA
Zeb1	chr18	5591860	5775467	+	26	12.5604	0.0224757	0.0939068	26 [18,8]	0 [0,0]	0.993843	ID=B16_463-1,ID=B16_464-2,ID=B16_464-1,ID=B16_502-3,ID=B16_12-3,ID=B16_16-3,ID=B16_474-3,ID=B16_16-4,ID=B16_497-1,ID=EL4_36_2,ID=B16_1-2,ID=B16_489-1,ID=B16_1-1,ID=B16_450-3,ID=B16_13-3,ID=B16_499-1,ID=B16_13-1,ID=B16_451-5,ID=B16_453-2,ID=B16_5-2,ID=B16_462-4,ID=LLC_174-1,ID=B16_17-3,ID=B16_515-1,ID=B16_491-3,ID=B16_491-2	NA	NA
Chst10	chr1	38863877	38898161	-	6	2.89855	0.0225579	0.0942063	6 [3,3]	0 [0,0]	1	ID=B16_463-1,ID=B16_464-2,ID=B16_464-1,ID=B16_474-4,ID=EL4_65-1,ID=EL4_44-2	NA	NA
Tek	chr4	94739289	94874976	+	20	9.66184	0.0225721	0.0942212	20 [11,9]	0 [0,0]	1	ID=EL4_28_3,ID=B16_488-3,ID=B16_464-2,ID=B16_464-1,ID=B16_485-3,ID=B16_487-2,ID=B16_498-1,ID=B16_502-1,ID=B16_460-1,ID=B16PD1_537_2,ID=B16_474-3,ID=B16_474-4,ID=EL4_32_2,ID=B16_489-1,ID=B16_450-3,ID=B16_449-4,ID=B16_451-5,ID=B16_462-4,ID=B16_484-1,ID=B16_491-3	NA	NA
[truncated: 6,253 more rows]

## Sheet: transcription_factors_only
gene_symbol	# of samples	p-value
Aff2	15	9.23e-10
[truncated: 58 more rows]
